# Supplementary material for: Transcriptome Analysis of Wheat Roots Reveals a Differential Regulation of Stress Responses Related to Arbuscular Mycorrhizal Fungi and Soil Disturbance
Source: MDPI journal article supplement (doi:10.3390/biology8040093), 2019-12-11
Supplement: s1 [file s1]

1

## Supplementary Information

2

3 **Transcriptome analysis of wheat roots reveals a differential regulation of stress**  
4 **responses related to arbuscular mycorrhizal fungi and soil disturbance**

5

6 Catarina Campos, Tânia Nobre, Michael J. Goss, Jorge Faria, Pedro Barrulas, Mário Carvalho

7

8

9

10

11

12

13

14

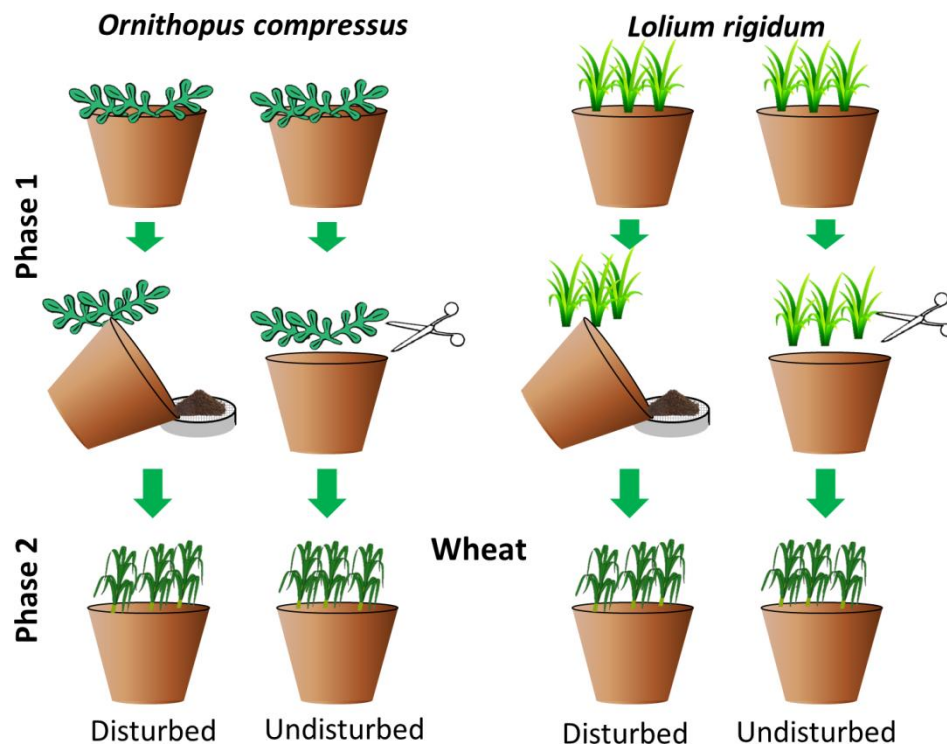

**Supplementary Fig. S1.** Experimental scheme. In Phase 1 of the experiment *O. compressus* or *L. rigidum* seedlings were planted and grown in pots. At the end of Phase 1, the plant shoots were excised. In half of the replicates of each system the soil was sieved (Disturbed regime). In the remaining pots, soil was kept undisturbed. In Phase 2, wheat seedlings were planted in the same pots as before. Living plants of *L. rigidum* or *O. compressus* were never present during this phase of the experiment, only roots or root fragments remained (for Undisturbed and Disturbed regimes, respectively).

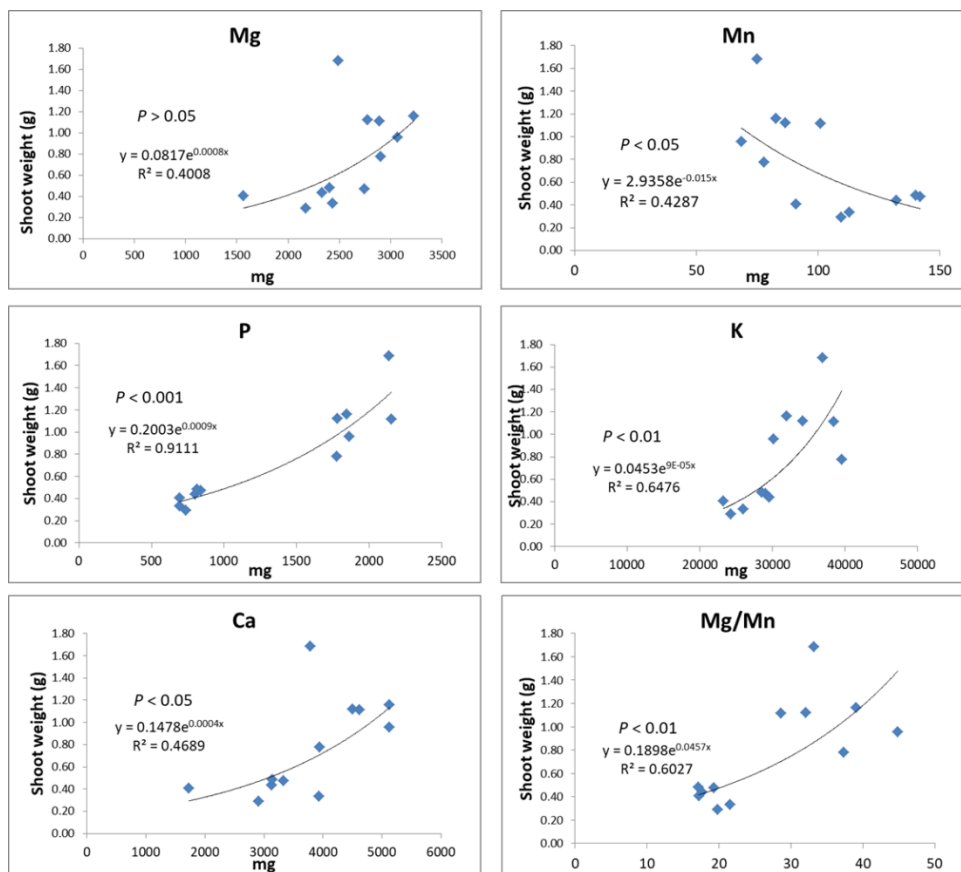

**Supplementary Fig. S2.** Elemental concentration was correlated with wheat shoot weight through exponential correlation at 5 weeks post-planting. Shoot weight increased exponentially with shoot P, Ca and K concentrations, decreasing in the case of Mn. The concentration of Mg was not significantly correlated with shoot weight; however, the ratio of Mg/Mn was significantly correlated with shoot weight.

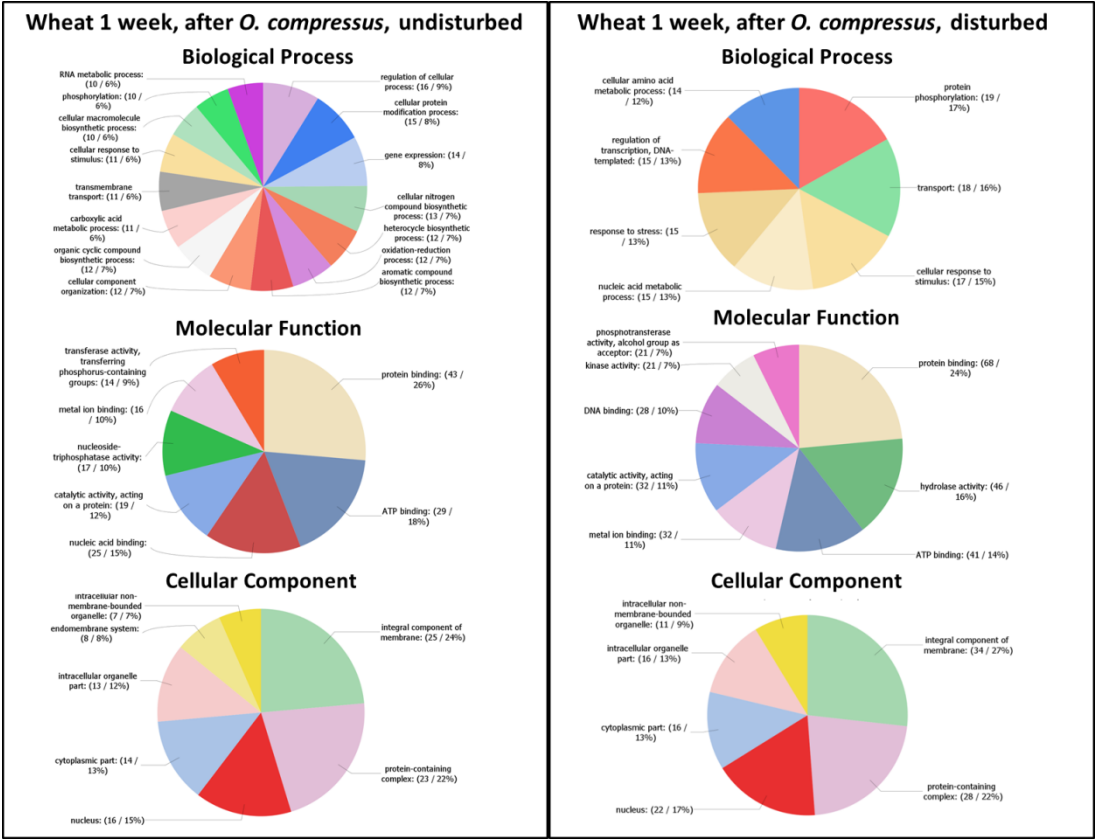

**Supplementary Fig. S3.** Gene Ontology enrichment of the Biological Process, Molecular Function and Cellular Component classes in wheat roots at 1 week post-planting, in the *Ornithopus compressus* system, between the Undisturbed and Disturbed regimes.

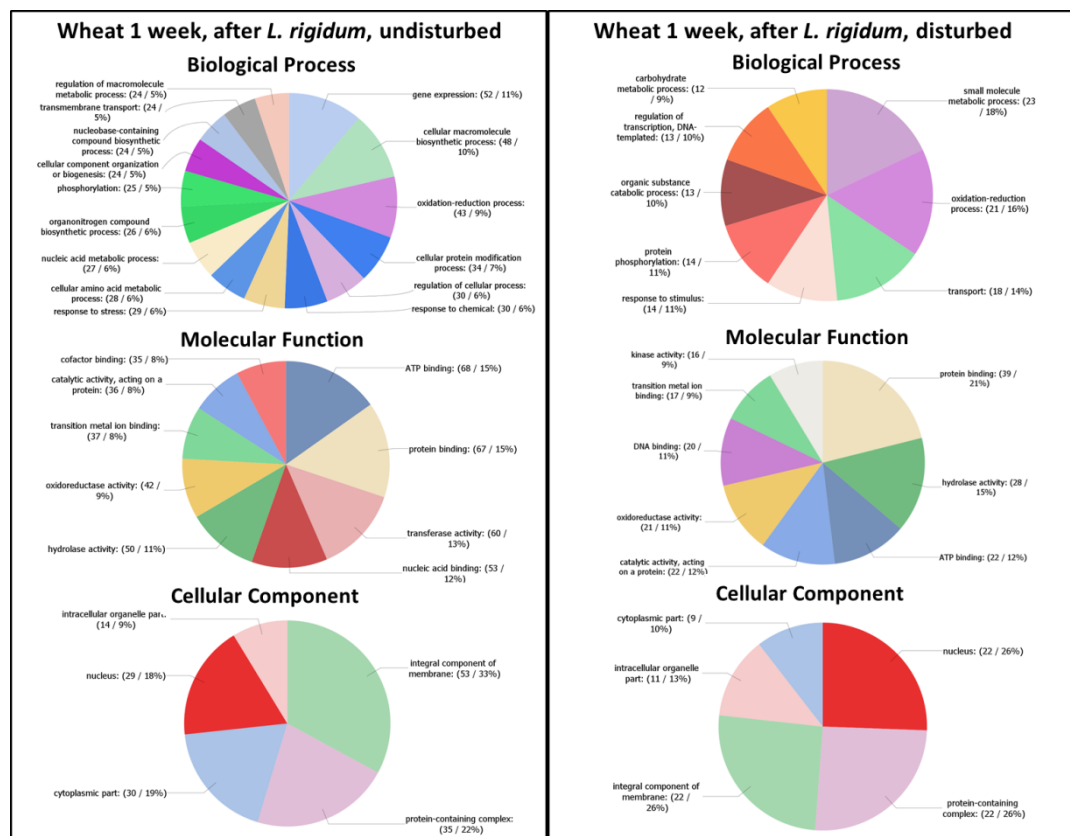

**Supplementary Fig. S4.** Gene Ontology enrichment of the Biological Process, Molecular Function and Cellular Component classes in wheat roots at 1 week post-planting, in the *Lolium rigidum* system, between the Undisturbed and Disturbed regimes.

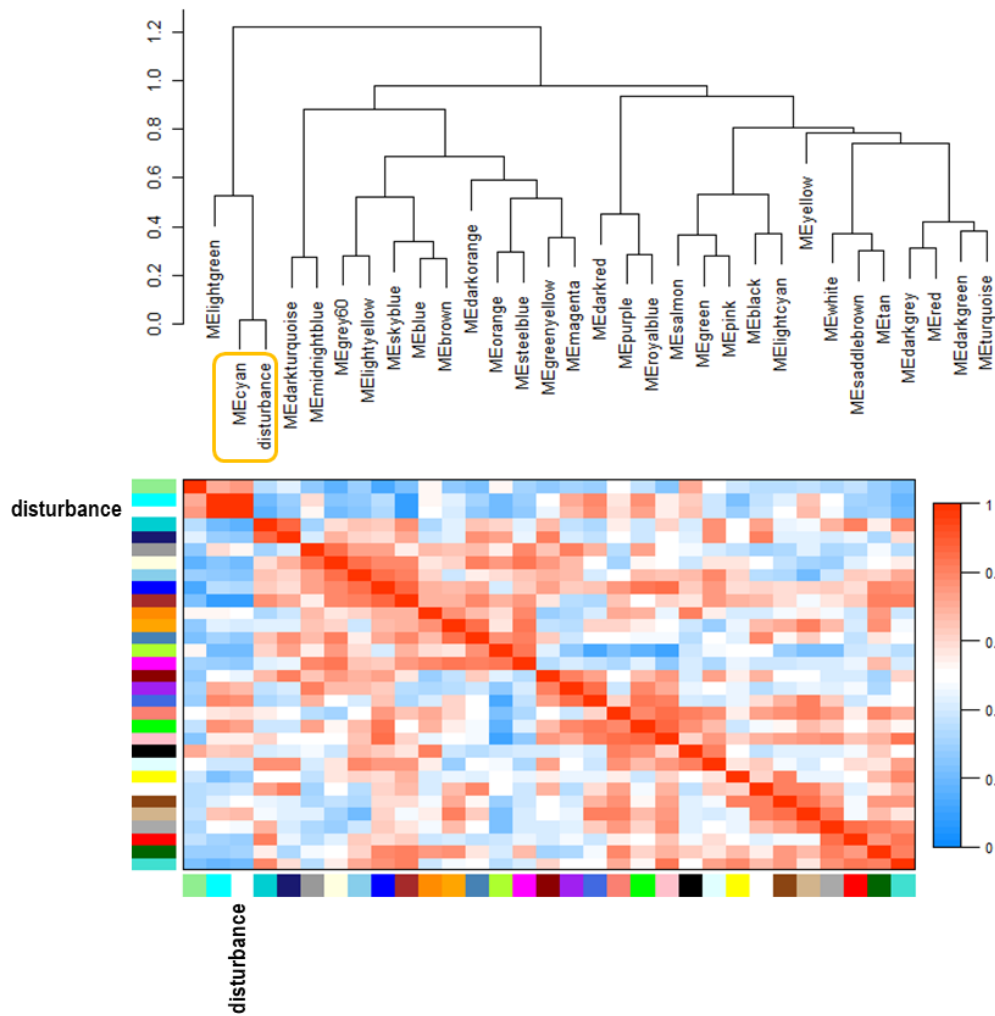

**Supplementary Fig. S5.** Wheat genes at 5 weeks post-planting differentially transcribed between the Undisturbed and Disturbed regimes were clustered into 30 modules using WGCNA. Different colours represent different modules. Dendrogram of module-trait correlation showed that module “cyan” was tightly correlated with disturbance.

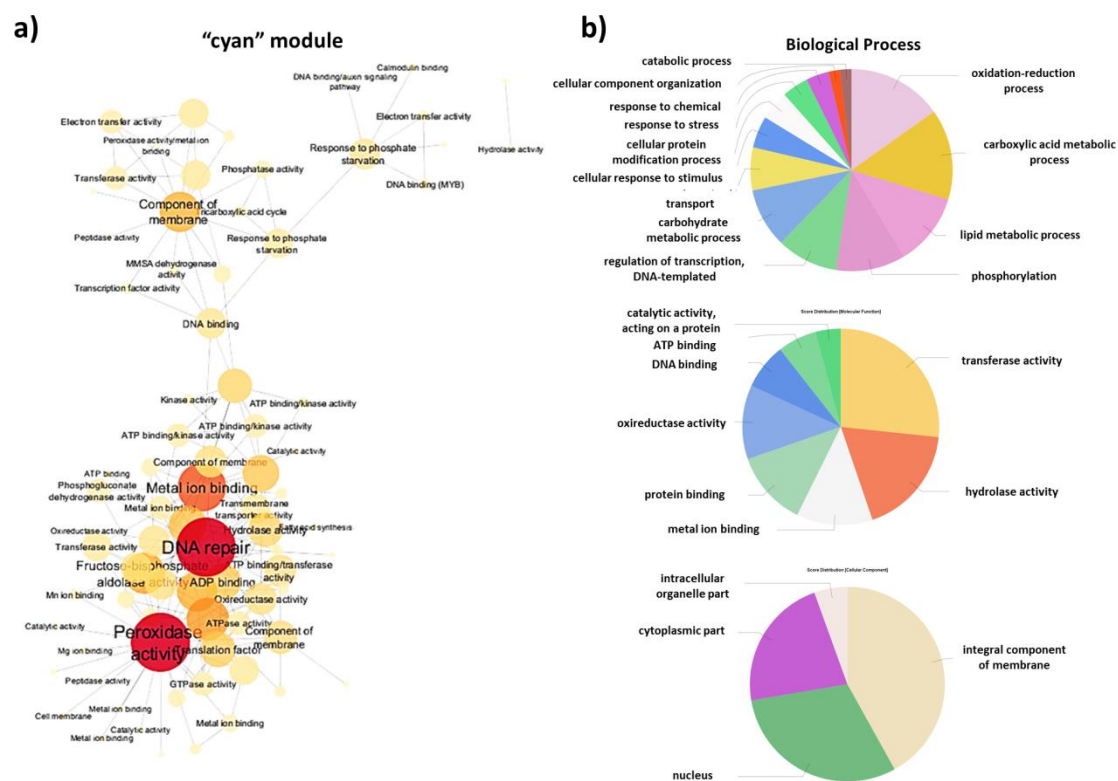

**Supplementary Fig. S6.** Gene co-expression modules showed that module "cyan" was tightly correlated with soil disturbance. a) Hub genes, which have the most connections in a network, were identified in this module, and were mostly related to "peroxidase activity", "DNA repair", "metal ion binding" and "response to phosphate starvation. b) Gene Ontology enrichment of the Biological Process, Molecular Function and Cellular Component classes in the "cyan" module.

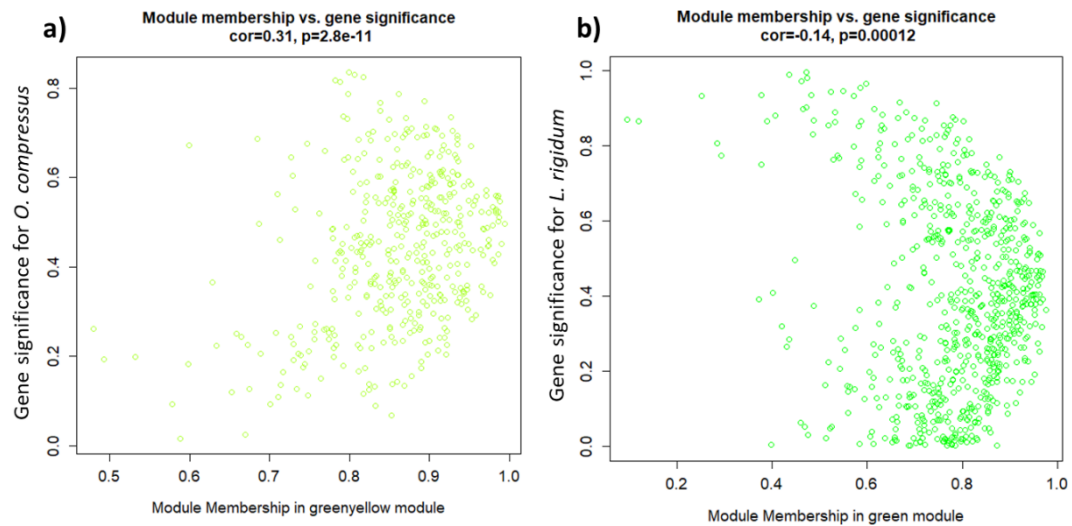

**Supplementary Fig. S7.** Scatterplot of Gene Significance (GS) for *Ornithopus compressus* (a) and *Lolium rigidum* (b) treatments vs. Module Membership (MM) in the “greenyellow” and “green” modules. There is a highly significant correlation between GS and MM for both modules.



99

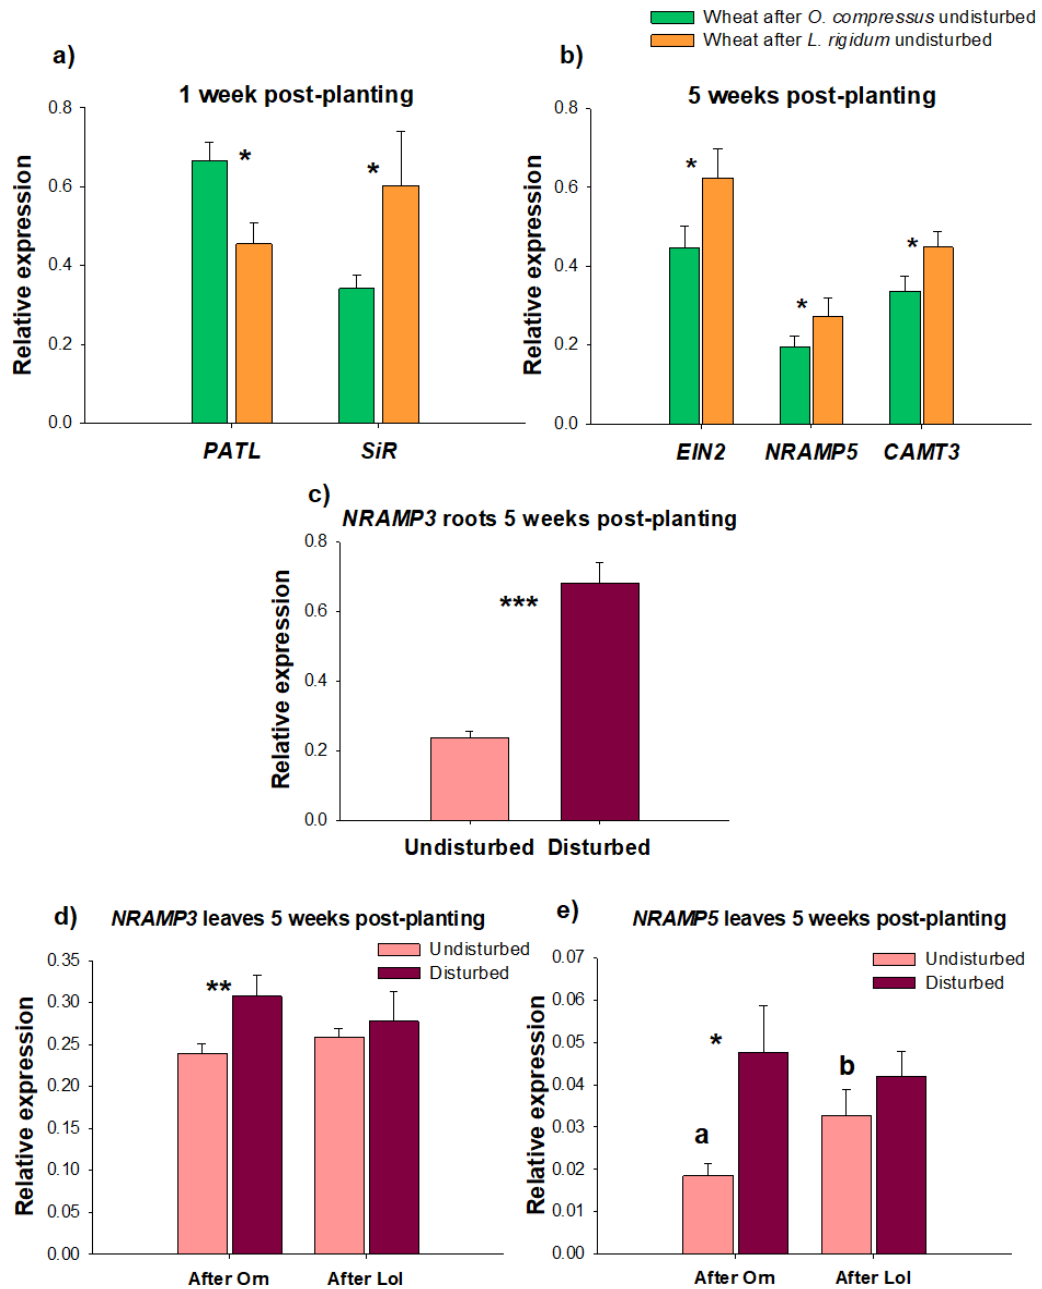

**Supplementary Fig. S9.** The expression of six wheat genes selected among those differentially expressed between Disturbed and Undisturbed regimes or between *O. compressus* and *L. rigidum* treatments were analysed by qRT-PCR.

107

108

**Table S1.** Primers used for validation of wheat (*Triticum aestivum*) selected genes by RT-qPCR

| Gene                                       | Accession #          | Forward sequence (5'→3')  | Reverse sequence (5'→3') | Amplicon size (bp) | E (%) |
|--------------------------------------------|----------------------|---------------------------|--------------------------|--------------------|-------|
| <i>PATL</i>                                | TraesCS1A02G268500.2 | ATCGCCAAGAAGGTGTTTCATC    | AAGAGGGTCTCGGCGGTC       | 134                | 102   |
| <i>SiR</i>                                 | TraesCS1A02G323400.1 | CGTCTCCACGCCTCTGAAG       | CAGCAGTCTCGTTGACATTGG    | 140                | 104   |
| <i>CAMT3</i>                               | TraesCS4D02G304500.3 | AAGTCAAGGCTGGAAAATCAAG    | ACCGTCTGTACTTTGTGAAGGC   | 110                | 100   |
| <i>NRAMP3</i>                              | TraesCS7D02G451900.1 | ACAATATGGGGTCCGTAAACTG    | GCCTCGCACAACCTCTGAAG     | 118                | 90    |
| <i>NRAMP5</i>                              | TraesCS4B02G300600.1 | TTGGCGTGGTTACAGGAAAG      | ACCTCCGCAAGAAGCCAG       | 91                 | 97    |
| <i>EIN2</i>                                | TraesCS4D02G036000.3 | CCATGATTTTCAGGCATAGCAGTTG | CCGAGGGGATAAGAGATATGG    | 119                | 104   |
| <i>Act</i>                                 | TraesCS5D02G132200.1 | AGTGGACGCACAACAGGTATC     | CATCAAACAGTCAGTTAGGTCGC  | 138                | 89    |
| <i>Peptidyl-prolyl cis-trans isomerase</i> | TraesCS6B02G093100.2 | CACTACAAGGGCAGCTCGTT      | AACTTCTCGCCGTAGATGGA     | 110                | 97    |
| <i>GAPDH</i>                               | TraesCS6D02G196300.2 | ATTAAGGGTGGTGCCAAGAAG     | CAGACTTGATTCTTCTCATTGAC  | 94                 | 95    |

For each gene, accession number, amplicon size (bp) and amplification efficiency are indicated. The annealing temperature of all primer pairs is 60 °C.

109

110

111

112

**Table S2.** Concentration values of Mg, Mn, P, K and Ca on wheat shoots at 5 weeks post-planting.

| Treatment                                               | Samples | Mg       | Mn      | P        | K         | Ca       | Mg/Mn |
|---------------------------------------------------------|---------|----------|---------|----------|-----------|----------|-------|
| Undisturbed <i>O. compressus</i>                        | 1       | 2491.877 | 74.961  | 2136.747 | 36932.333 | 3781.351 | 33.24 |
|                                                         | 2       | 2777.252 | 86.509  | 1782.305 | 34181.187 | 4497.694 | 32.10 |
|                                                         | 3       | 2889.840 | 100.853 | 2154.022 | 38441.969 | 4619.767 | 28.65 |
| Disturbed <i>O. compressus</i>                          | 4       | 2171.168 | 109.538 | 735.281  | 24282.427 | 2911.190 | 19.82 |
|                                                         | 5       | 2742.591 | 141.893 | 838.876  | 29066.666 | 3326.379 | 19.33 |
|                                                         | 6       | 2331.476 | 132.128 | 800.637  | 29589.606 | 3129.916 | 17.65 |
| Undisturbed <i>L. rigidum</i>                           | 7       | 3065.997 | 68.386  | 1864.398 | 30186.110 | 5121.524 | 44.83 |
|                                                         | 8       | 3228.353 | 82.648  | 1847.791 | 31990.785 | 5128.294 | 39.06 |
|                                                         | 9       | 2902.809 | 77.755  | 1777.235 | 39545.710 | 3945.554 | 37.33 |
| Disturbed <i>L. rigidum</i>                             | 10      | 2431.807 | 112.756 | 696.658  | 26023.788 | 3933.681 | 21.57 |
|                                                         | 11      | 2401.700 | 140.128 | 815.367  | 28529.659 | 3144.122 | 17.14 |
|                                                         | 12      | 1565.599 | 90.943  | 693.801  | 23245.586 | 1729.663 | 17.22 |
| Concentrations of cations are given by mg / Kg shoot DW |         |          |         |          |           |          |       |

**Table S3.** Read numbers obtained from the *Triticum aestivum* transcriptome during the bioinformatic analysis.

| Treatment |                      |     | Library | # raw reads | # reads after trimming | # mapped reads | % of mapped reads |
|-----------|----------------------|-----|---------|-------------|------------------------|----------------|-------------------|
| 1 week    | <i>O. compressus</i> | Und | 1WOU1   | 29 869 174  | 29 359 660             | 24 643 745     | 83.88             |
|           |                      |     | 1WOU2   | 54 601 724  | 52 939 464             | 45 587 590     | 86.13             |
|           |                      | Dis | 1WOD1   | 29 202 166  | 25 342 166             | 21 332 897     | 84.20             |
|           |                      |     | 1WOD2   | 44 430 030  | 42 683 398             | 36 500 400     | 85.49             |
|           | <i>L. rigidum</i>    | Und | 1WLU1   | 56 065 052  | 53 666 040             | 41 005 808     | 76.42             |
|           |                      |     | 1WLU2   | 48 114 410  | 46 471 632             | 37 666 586     | 81.05             |
|           |                      | Dis | 1WLD1   | 36 136 020  | 35 000 464             | 30 117 769     | 86.04             |
|           |                      |     | 1WLD2   | 44 304 746  | 42 896 220             | 36 740 543     | 85.63             |
| 5 weeks   | <i>O. compressus</i> | Und | 5WOU1   | 48 660 686  | 47 183 672             | 27 561 183     | 58.45             |
|           |                      |     | 5WOU2   | 37 458 178  | 35 575 338             | 21 215 105     | 59.65             |
|           |                      | Dis | 5WOD1   | 13 584 462  | 10 507 628             | 6 662 774      | 63.43             |
|           |                      |     | 5WOD2   | 52 987 650  | 51 227 340             | 32 254 489     | 62.97             |
|           | <i>L. rigidum</i>    | Und | 5WLU1   | 48 791 424  | 47 393 518             | 29 009 663     | 61.22             |
|           |                      |     | 5WLU2   | 55 838 398  | 54 231 896             | 38 561 288     | 71.16             |
|           |                      | Dis | 5WLD1   | 37 588 434  | 36 747 452             | 20 672 419     | 56.21             |
|           |                      |     | 5WLD2   | 42 773 886  | 41 768 400             | 24 058 698     | 57.60             |

**Table S4.** Read numbers obtained from the *Rhizoglossus irregulare* transcriptome during the bioinformatic analysis.

|                |                      |     | Library | # mapped reads | # genes |
|----------------|----------------------|-----|---------|----------------|---------|
| <b>5 weeks</b> | <i>O. compressus</i> | Und | 5WOU1   | 225 958        | 7195    |
|                |                      |     | 5WOU2   | 122 052        | 3960    |
|                |                      | Dis | 5WOD1   | 33 442         | 975     |
|                |                      |     | 5WOD2   | 223 236        | 7009    |
|                | <i>L. rigidum</i>    | Und | 5WLU1   | 315 838        | 9492    |
|                |                      |     | 5WLU2   | 119 866        | 5624    |
|                |                      | Dis | 5WLD1   | 208 311        | 6793    |
|                |                      |     | 5WLD2   | 211 960        | 7107    |

Und – Undisturbed; Dis – Disturbed
