# Supplementary material for: Transcriptome Analysis of Wheat Roots Reveals a Differential Regulation of Stress Responses Related to Arbuscular Mycorrhizal Fungi and Soil Disturbance
Source: Biology (Basel). 2019 Dec 11;8(4):93. doi: 10.3390/biology8040093 (PMC6956056; doi:10.3390/biology8040093)
Supplement: Supplementary file 1 [file biology-08-00093-s001.zip]

Archive with 4 entries (4 files):
- Supplementary Information.pdf
- Table S5.xlsx
- Table S6.xlsx
- Table S7.xlsx
