# Supplementary material for: Transcriptome Analysis of Wheat Roots Reveals a Differential Regulation of Stress Responses Related to Arbuscular Mycorrhizal Fungi and Soil Disturbance
Source: Biology (Basel). 2019 Dec 11;8(4):93. doi: 10.3390/biology8040093 (PMC6956056; doi:10.3390/biology8040093)
Supplement: Supplementary file 1 [file biology-08-00093-s001.zip › Table S5.xlsx]

## Sheet: 1Week only Undisturbed
Tags	Week	Previous host	Disturbance	Name	logFC	FDR	Description
Up-regulated	1	O. compressus	Undisturbed	TraesCS2B02G292000.1	13.2522	8.53229e-45	importin beta-like SAD2
Up-regulated	1	O. compressus	Undisturbed	TraesCS4D02G358800.2	13.161	2.98615e-42	Metacaspase-1
Up-regulated	1	O. compressus	Undisturbed	TraesCS1A02G438600.1	13.1041	2.93853e-27	eukaryotic translation initiation factor 5B-like
Up-regulated	1	O. compressus	Undisturbed	TraesCS4B02G220900.2	12.9681	2.69067e-35	TOPLESS
Up-regulated	1	O. compressus	Undisturbed	TraesCS1B02G279100.1	12.7128	2.28584e-29	isoflavone reductase homolog IRL
Up-regulated	1	O. compressus	Undisturbed	TraesCS6B02G194700.2	12.4908	0.000141781	Citrate synthase
Up-regulated	1	O. compressus	Undisturbed	TraesCS4D02G147700.4	12.4798	2.93853e-27	sister-chromatid cohesion protein 3
Up-regulated	1	O. compressus	Undisturbed	TraesCS3A02G192400.2	12.2275	2.05261e-26	Coatomer subunit beta [Source:UniProtKB/TrEMBL;Acc:A0A341RYE1]
Up-regulated	1	O. compressus	Undisturbed	TraesCS2A02G280700.1	12.0847	2.93853e-27	Acyl-[acyl-carrier-protein] desaturase
Up-regulated	1	O. compressus	Undisturbed	TraesCS2B02G505400.1	11.808	1.49506e-20	Kinesin-like protein
Up-regulated	1	O. compressus	Undisturbed	TraesCS3B02G255800.1	11.7546	3.13095e-21	Beta-adaptin-like protein
Up-regulated	1	O. compressus	Undisturbed	TraesCS2D02G430700.2	11.7323	1.27812e-06	Calcium-transporting ATPase
Up-regulated	1	O. compressus	Undisturbed	TraesCS7B02G186300.2	11.6766	2.20185e-08	Transmembrane 9 superfamily member
Up-regulated	1	O. compressus	Undisturbed	TraesCS2D02G212800.1	11.6523	1.56118e-07	brefeldin A-inhibited guanine nucleotide-exchange protein 5
Up-regulated	1	O. compressus	Undisturbed	TraesCS2A02G185500.1	11.6311	3.31978e-09	Tubulin alpha chain
Up-regulated	1	O. compressus	Undisturbed	TraesCS3D02G197700.2	11.6299	1.7485e-11	kinesin-like protein
Up-regulated	1	O. compressus	Undisturbed	TraesCS1D02G132600.3	11.572	0.0158698	ubiquitin carboxyl-terminal hydrolase 9
Up-regulated	1	O. compressus	Undisturbed	TraesCS7D02G289400.3	11.495	2.13253e-20	Structural maintenance of chromosomes protein
Up-regulated	1	O. compressus	Undisturbed	TraesCS5D02G175100.3	11.4085	1.73431e-18	GBF-interacting protein 1-like
Up-regulated	1	O. compressus	Undisturbed	TraesCS2A02G410800.2	11.3689	2.26351e-06	BEACH domain-containing protein C2 isoform X2
Up-regulated	1	O. compressus	Undisturbed	TraesCS3A02G251000.4	11.3634	2.22855e-16	receptor-like serine/threonine-protein kinase
Up-regulated	1	O. compressus	Undisturbed	TraesCS2D02G385000.3	11.2894	4.93425e-15	Kinesin-like protein
Up-regulated	1	O. compressus	Undisturbed	TraesCS5D02G292700.1	11.2785	6.28769e-18	Uridine kinase
Up-regulated	1	O. compressus	Undisturbed	TraesCS7A02G215200.4	11.2184	3.59594e-08	sister chromatid cohesion protein PDS5 homolog A
Up-regulated	1	O. compressus	Undisturbed	TraesCS2D02G225200.1	11.1844	6.1595e-17	pre-rRNA-processing protein ESF1-like
Up-regulated	1	O. compressus	Undisturbed	TraesCS1A02G268500.2	11.165	4.2263e-16	patellin
Up-regulated	1	O. compressus	Undisturbed	TraesCS1A02G131000.1	11.0805	7.27065e-10	uncharacterized protein
Up-regulated	1	O. compressus	Undisturbed	TraesCS6D02G127600.1	11.0443	5.29008e-16	Auxin response factor
Up-regulated	1	O. compressus	Undisturbed	TraesCS1B02G156800.1	11.0397	4.15231e-14	RNA-binding protein 39-like
Up-regulated	1	O. compressus	Undisturbed	TraesCS5A02G123200.1	10.9847	2.55557e-15	protein FAM135B
Up-regulated	1	O. compressus	Undisturbed	TraesCS4A02G067700.2	10.9824	5.81651e-12	filament-like plant protein 4
Up-regulated	1	O. compressus	Undisturbed	TraesCS4D02G193100.2	10.9505	1.64297e-14	rab3 GTPase-activating protein catalytic subunit
Up-regulated	1	O. compressus	Undisturbed	TraesCS5B02G371800.2	10.8873	4.66953e-14	serine/threonine-protein kinase
Up-regulated	1	O. compressus	Undisturbed	TraesCS7B02G102800.3	10.8769	0.000223001	uncharacterized protein
Up-regulated	1	O. compressus	Undisturbed	TraesCS3D02G178300.2	10.8595	2.25274e-07	proline-rich receptor-like protein kinase
Up-regulated	1	O. compressus	Undisturbed	TraesCS1D02G202800.1	10.8452	6.24477e-05	phagocyte signaling-impaired protein
Up-regulated	1	O. compressus	Undisturbed	TraesCS7D02G449900.3	10.844	1.93856e-11	Auxin response factor
Up-regulated	1	O. compressus	Undisturbed	TraesCS4B02G109700.2	10.829	1.95682e-14	FHA domain-containing protein
Up-regulated	1	O. compressus	Undisturbed	TraesCSU02G068100.1	10.8219	0.0239355	U2 snRNP auxiliary factor large subunit
Up-regulated	1	O. compressus	Undisturbed	TraesCS1D02G224400.1	10.7964	1.41032e-13	importin subunit beta-1
Up-regulated	1	O. compressus	Undisturbed	TraesCS1A02G278100.1	10.7789	1.2554e-13	Arginyl-tRNA--protein transferase
Up-regulated	1	O. compressus	Undisturbed	TraesCS6A02G131300.1	10.7723	0.000690661	EH domain-containing protein
Up-regulated	1	O. compressus	Undisturbed	TraesCS1D02G176100.3	10.7634	5.66704e-06	kinesin-like protein
Up-regulated	1	O. compressus	Undisturbed	TraesCS3D02G196800.5	10.7458	2.3327e-11	lisH domain and HEAT repeat-containing protein
Up-regulated	1	O. compressus	Undisturbed	TraesCS3B02G297900.2	10.7099	5.13931e-05	65-kDa microtubule-associated protein 3
Up-regulated	1	O. compressus	Undisturbed	TraesCS3D02G362200.2	10.6727	2.4799e-06	nuclear pore complex protein NUP62
Up-regulated	1	O. compressus	Undisturbed	TraesCSU02G121900.2	10.6701	0.000109954	AUGMIN subunit 4
Up-regulated	1	O. compressus	Undisturbed	TraesCS3B02G191900.1	10.667	6.56139e-09	uncharacterized protein
Up-regulated	1	O. compressus	Undisturbed	TraesCS4B02G137800.3	10.6395	4.94342e-13	nuclear pore complex protein NUP98A
Up-regulated	1	O. compressus	Undisturbed	TraesCS2A02G419900.3	10.6251	2.85093e-12	argonaute 2
Up-regulated	1	O. compressus	Undisturbed	TraesCS3A02G023200.1	10.5893	4.66659e-12	plasma membrane Na+/H+ antiporter
Up-regulated	1	O. compressus	Undisturbed	TraesCS1D02G255700.1	10.5879	2.53763e-10	uncharacterized protein
Up-regulated	1	O. compressus	Undisturbed	TraesCS1D02G225300.2	10.5788	1.08334e-11	uncharacterized protein
Up-regulated	1	O. compressus	Undisturbed	TraesCS4D02G240200.2	10.5595	1.8133e-10	nuclear pore complex protein NUP155
Up-regulated	1	O. compressus	Undisturbed	TraesCS6B02G208900.3	10.55	3.63894e-06	peptidyl-prolyl cis-trans isomerase CYP95 isoform X2
Up-regulated	1	O. compressus	Undisturbed	TraesCS2D02G554500.2	10.5356	2.91592e-06	microtubule-associated protein 70-1
Up-regulated	1	O. compressus	Undisturbed	TraesCS3B02G238300.2	10.5154	6.13337e-12	N/A
Up-regulated	1	O. compressus	Undisturbed	TraesCS1B02G237000.2	10.5117	4.23663e-12	uncharacterized protein
Up-regulated	1	O. compressus	Undisturbed	TraesCS1D02G161000.3	10.5055	2.98589e-05	ALG-2 interacting protein X-like
Up-regulated	1	O. compressus	Undisturbed	TraesCS7A02G231400.1	10.5012	1.17191e-08	tRNA(adenine(34)) deaminase, chloroplastic
Up-regulated	1	O. compressus	Undisturbed	TraesCS6D02G132500.1	10.4919	6.54694e-11	porphobilinogen deaminase
Up-regulated	1	O. compressus	Undisturbed	TraesCS3D02G357200.2	10.4444	0.000590611	Delta-1-pyrroline-5-carboxylate synthase
Up-regulated	1	O. compressus	Undisturbed	TraesCS3B02G394100.7	10.4369	2.38038e-06	pumilio homolog 1-like
Up-regulated	1	O. compressus	Undisturbed	TraesCS7D02G388400.3	10.4326	1.42214e-05	tryptophan synthase beta chain 2
Up-regulated	1	O. compressus	Undisturbed	TraesCS4B02G201800.3	10.3955	3.21889e-11	DNA (cytosine-5)-methyltransferase
Up-regulated	1	O. compressus	Undisturbed	TraesCS2D02G419000.1	10.3835	7.19394e-09	Potassium transporter
Up-regulated	1	O. compressus	Undisturbed	TraesCS2B02G099700.2	10.3714	1.10879e-07	uncharacterized protein
Up-regulated	1	O. compressus	Undisturbed	TraesCS7A02G409200.1	10.357	2.23551e-08	Poly [ADP-ribose] polymerase
Up-regulated	1	O. compressus	Undisturbed	TraesCS2D02G458300.1	10.3325	2.14087e-08	peroxisome biogenesis protein 6
Up-regulated	1	O. compressus	Undisturbed	TraesCS5A02G497000.2	10.2721	0.00644135	epidermal growth factor receptor substrate 15
Up-regulated	1	O. compressus	Undisturbed	TraesCS4D02G184600.2	10.2697	0.00512431	Histone-lysine N-methyltransferase
Up-regulated	1	O. compressus	Undisturbed	TraesCS1D02G148800.3	10.2697	1.68803e-08	WD repeat-containing protein 91 homolog isoform X1
Up-regulated	1	O. compressus	Undisturbed	TraesCS7B02G177500.3	10.2432	1.86217e-09	mediator of RNA polymerase II transcription subunit 15a
Up-regulated	1	O. compressus	Undisturbed	TraesCS2B02G584000.2	10.2401	2.301e-10	pentatricopeptide repeat-containing protein At4g01990, mitochondrial
Up-regulated	1	O. compressus	Undisturbed	TraesCS1D02G405300.2	10.2245	4.14473e-07	Splicing factor U2af small subunit B
Up-regulated	1	O. compressus	Undisturbed	TraesCS5B02G177300.3	10.2136	1.39104e-09	mediator complex subunit 25
Up-regulated	1	O. compressus	Undisturbed	TraesCS7A02G040700.3	10.2022	1.98743e-05	Argonaute
Up-regulated	1	O. compressus	Undisturbed	TraesCS1A02G126300.2	10.1893	1.03666e-08	alpha-1,2-Mannosidase
Up-regulated	1	O. compressus	Undisturbed	TraesCS6D02G258000.3	10.171	0.00611303	protease Do-like 7
Up-regulated	1	O. compressus	Undisturbed	TraesCS2A02G430100.5	10.1641	0.0142577	26S proteasome non-ATPase regulatory subunit 1 homolog
Up-regulated	1	O. compressus	Undisturbed	TraesCS6A02G146200.4	10.1303	0.0214653	Two-component response regulator
Up-regulated	1	O. compressus	Undisturbed	TraesCS6A02G103200.1	10.1126	1.60943e-06	kinesin-like protein
Up-regulated	1	O. compressus	Undisturbed	TraesCS2B02G147300.2	10.0779	5.23038e-05	homeobox-DDT domain protein
Up-regulated	1	O. compressus	Undisturbed	TraesCS4B02G037700.2	10.0655	7.02269e-09	Lipoxygenase
Up-regulated	1	O. compressus	Undisturbed	TraesCS1A02G223700.2	10.0608	9.43724e-09	hypothetical protein
Up-regulated	1	O. compressus	Undisturbed	TraesCS6B02G222900.1	10.024	3.76202e-05	cytosolic invertase 1
Up-regulated	1	O. compressus	Undisturbed	TraesCS7B02G197700.1	10.0209	4.75756e-09	histone-lysine N-methyltransferase ATXR3
Up-regulated	1	O. compressus	Undisturbed	TraesCS7A02G398600.3	9.99969	6.03911e-09	cell division cycle protein 27 homolog B
Up-regulated	1	O. compressus	Undisturbed	TraesCS2D02G362700.2	9.96777	9.05423e-09	endoribonuclease Dicer homolog 4
Up-regulated	1	O. compressus	Undisturbed	TraesCS5B02G002600.1	9.96597	5.78539e-08	CCD-B1
Up-regulated	1	O. compressus	Undisturbed	TraesCS2D02G114500.2	9.9585	5.98994e-05	uncharacterized protein LOC109783382
Up-regulated	1	O. compressus	Undisturbed	TraesCS5B02G413900.1	9.94354	2.75834e-08	predicted protein
Up-regulated	1	O. compressus	Undisturbed	TraesCS2D02G269800.7	9.89216	4.61321e-08	uncharacterized protein LOC109786668
Up-regulated	1	O. compressus	Undisturbed	TraesCS3D02G258300.3	9.87918	1.59625e-07	ABC transporter B family member 5-like
Up-regulated	1	O. compressus	Undisturbed	TraesCS5A02G490200.2	9.85866	7.85525e-06	calcium-dependent protein kinase 7-like
Up-regulated	1	O. compressus	Undisturbed	TraesCS4B02G142300.1	9.8476	3.55689e-08	probable GTP-binding protein OBGM, mitochondrial
Up-regulated	1	O. compressus	Undisturbed	TraesCS2A02G422600.2	9.81727	9.74014e-08	Potassium transporter
Up-regulated	1	O. compressus	Undisturbed	TraesCS3B02G233000.1	9.80598	0.000207561	vacuolar processing enzyme 4
Up-regulated	1	O. compressus	Undisturbed	TraesCS2D02G117800.2	9.78945	5.42675e-07	DNA polymerase zeta catalytic subunit
Up-regulated	1	O. compressus	Undisturbed	TraesCS2B02G253600.4	9.789	7.41374e-06	COP9 signalosome complex subunit 7
Up-regulated	1	O. compressus	Undisturbed	TraesCS7B02G176900.6	9.78159	3.48708e-05	uncharacterized membrane protein At1g16860-like
Up-regulated	1	O. compressus	Undisturbed	TraesCS4B02G101900.2	9.76259	0.000435973	target of Myb protein 1
Up-regulated	1	O. compressus	Undisturbed	TraesCS1D02G202800.2	9.75418	0.000484583	phagocyte signaling-impaired protein
Up-regulated	1	O. compressus	Undisturbed	TraesCS2A02G129600.2	9.74775	9.4721e-08	uncharacterized protein LOC109744178
Up-regulated	1	O. compressus	Undisturbed	TraesCS5B02G115600.2	9.74594	3.53289e-06	Defective in cullin neddylation protein [Source:UniProtKB/TrEMBL;Acc:W5G2J7]
Up-regulated	1	O. compressus	Undisturbed	TraesCS6A02G088200.1	9.72342	1.76897e-07	symplekin
Up-regulated	1	O. compressus	Undisturbed	TraesCSU02G035900.1	9.71781	3.46441e-07	receptor protein kinase TMK1-like
Up-regulated	1	O. compressus	Undisturbed	TraesCS2A02G261100.1	9.69641	1.60943e-06	unnamed protein product
Up-regulated	1	O. compressus	Undisturbed	TraesCS3A02G175700.2	9.59493	1.56559e-06	zinc finger CCCH domain-containing protein 4
Up-regulated	1	O. compressus	Undisturbed	TraesCS3A02G446500.2	9.59057	2.09688e-06	unnamed protein product
Up-regulated	1	O. compressus	Undisturbed	TraesCS2A02G473900.2	9.58007	5.19631e-07	uncharacterized protein LOC109784997
Up-regulated	1	O. compressus	Undisturbed	TraesCS1B02G460600.2	9.57806	0.00967002	putative polyol transporter 1
Up-regulated	1	O. compressus	Undisturbed	TraesCS5A02G313200.2	9.57504	9.63682e-06	plant UBX domain-containing protein 13-like
Up-regulated	1	O. compressus	Undisturbed	TraesCS7A02G380900.2	9.57253	6.01661e-07	ABCB26
Up-regulated	1	O. compressus	Undisturbed	TraesCS2B02G376100.1	9.55777	0.00145632	trafficking protein particle complex II-specific subunit 120
Up-regulated	1	O. compressus	Undisturbed	TraesCS1B02G329600.2	9.53903	0.000340322	B2 protein
Up-regulated	1	O. compressus	Undisturbed	TraesCS5A02G233900.2	9.52452	3.18232e-06	65-kDa microtubule-associated protein 6-like
Up-regulated	1	O. compressus	Undisturbed	TraesCS2D02G286200.6	9.51897	0.00034379	protein MEI2-like 4
Up-regulated	1	O. compressus	Undisturbed	TraesCS4A02G407100.3	9.51504	3.36202e-06	calmodulin-binding transcription activator 3-like
Up-regulated	1	O. compressus	Undisturbed	TraesCS6B02G139300.2	9.51181	6.80827e-07	protein ABC transporter 1, mitochondrial
Up-regulated	1	O. compressus	Undisturbed	TraesCS4B02G228300.2	9.49336	0.00118399	triadin-like
Up-regulated	1	O. compressus	Undisturbed	TraesCS4D02G234900.1	9.48004	8.97213e-07	uncharacterized protein LOC109732965
Up-regulated	1	O. compressus	Undisturbed	TraesCS1A02G236600.1	9.47376	2.34127e-06	myb family transcription factor EFM-like
Up-regulated	1	O. compressus	Undisturbed	TraesCS7B02G005700.1	9.45865	6.98414e-06	Ubiquitin-like modifier-activating enzyme 5
Up-regulated	1	O. compressus	Undisturbed	TraesCS2B02G397200.2	9.45185	3.28053e-06	endoplasmic reticulum metallopeptidase 1
Up-regulated	1	O. compressus	Undisturbed	TraesCS7B02G060100.3	9.43496	7.5707e-05	uncharacterized protein LOC109778722
Up-regulated	1	O. compressus	Undisturbed	TraesCS6B02G333700.3	9.42666	0.00153501	uncharacterized protein LOC109746218
Up-regulated	1	O. compressus	Undisturbed	TraesCS4A02G013700.2	9.42242	1.48727e-06	putative glucuronoxylan glucuronosyltransferase F8H
Up-regulated	1	O. compressus	Undisturbed	TraesCS5D02G497400.2	9.41624	2.57935e-05	protein KTI12 homolog
Up-regulated	1	O. compressus	Undisturbed	TraesCS3B02G215900.1	9.40567	0.000684572	BSD domain-containing protein 1-like
Up-regulated	1	O. compressus	Undisturbed	TraesCS6B02G177000.2	9.39967	3.85393e-06	autophagy-related protein 11
Up-regulated	1	O. compressus	Undisturbed	TraesCS4A02G169300.8	9.38326	0.000775583	uncharacterized protein LOC109768951
Up-regulated	1	O. compressus	Undisturbed	TraesCS5D02G037300.2	9.37754	0.000741209	protein IQ-DOMAIN 1-like
Up-regulated	1	O. compressus	Undisturbed	TraesCS2D02G426000.1	9.351	7.87026e-06	uncharacterized protein LOC109759269
Up-regulated	1	O. compressus	Undisturbed	TraesCS3D02G285700.3	9.34736	5.46751e-06	Malic enzyme [Source:UniProtKB/TrEMBL;Acc:A0A1D5WEU7]
Up-regulated	1	O. compressus	Undisturbed	TraesCS4A02G063700.4	9.30727	7.54753e-06	protein VAC14 homolog
Up-regulated	1	O. compressus	Undisturbed	TraesCS5D02G371100.9	9.29146	5.26185e-05	uncharacterized protein LOC109755277
Up-regulated	1	O. compressus	Undisturbed	TraesCS5D02G256300.1	9.24972	1.43925e-05	protein SCAI homolog
Up-regulated	1	O. compressus	Undisturbed	TraesCS5D02G548600.2	9.24651	2.47181e-05	putative disease resistance RPP13-like protein 3
Up-regulated	1	O. compressus	Undisturbed	TraesCS6A02G111200.3	9.24525	5.35879e-05	protein ABC transporter 1, mitochondrial
Up-regulated	1	O. compressus	Undisturbed	TraesCS5D02G140400.1	9.22147	2.72876e-05	L-galactono-1,4-lactone dehydrogenase
Up-regulated	1	O. compressus	Undisturbed	TraesCS7A02G291700.3	9.21001	0.0141239	uncharacterized protein LOC109757700
Up-regulated	1	O. compressus	Undisturbed	TraesCS1B02G187000.2	9.20713	5.37318e-06	trafficking protein particle complex subunit 13
Up-regulated	1	O. compressus	Undisturbed	TraesCS5A02G107600.2	9.20217	0.000106023	uncharacterized protein LOC109741306
Up-regulated	1	O. compressus	Undisturbed	TraesCS1D02G222600.1	9.19962	2.24816e-05	D-3-phosphoglycerate dehydrogenase
Up-regulated	1	O. compressus	Undisturbed	TraesCS3A02G233800.2	9.19244	5.19007e-05	AKT1-like potassium channel [Source:UniProtKB/TrEMBL;Acc:Q9M671]
Up-regulated	1	O. compressus	Undisturbed	TraesCS7B02G076100.1	9.12083	8.88422e-06	fucosyltransferase 2-like
Up-regulated	1	O. compressus	Undisturbed	TraesCS5A02G159200.1	9.11711	2.75127e-05	RNA pseudourine synthase 4, mitochondrial
Up-regulated	1	O. compressus	Undisturbed	TraesCS6A02G384000.1	9.10862	1.19588e-05	F-box protein PP2-B10-like
Up-regulated	1	O. compressus	Undisturbed	TraesCS1B02G327300.2	9.09263	0.000154699	putative E3 ubiquitin-protein ligase RING1a
Up-regulated	1	O. compressus	Undisturbed	TraesCS4A02G457600.3	9.08546	7.48701e-05	membrane protein of ER body-like protein
Up-regulated	1	O. compressus	Undisturbed	TraesCSU02G110800.2	9.07645	2.9803e-05	disease resistance protein RGA2-like
Up-regulated	1	O. compressus	Undisturbed	TraesCS4A02G165300.1	9.06925	0.00548726	E3 ubiquitin-protein ligase RHF2A
Up-regulated	1	O. compressus	Undisturbed	TraesCS5A02G234300.2	9.05788	2.69338e-05	1-aminocyclopropane-1-carboxylate oxidase 1-like
Up-regulated	1	O. compressus	Undisturbed	TraesCS7D02G408000.3	9.05132	2.22617e-05	Delta-aminolevulinic acid dehydratase [Source:UniProtKB/TrEMBL;Acc:A0A1D6CUN0]
Up-regulated	1	O. compressus	Undisturbed	TraesCS6D02G031700.1	9.0207	0.00606715	uncharacterized protein LOC109777234
Up-regulated	1	O. compressus	Undisturbed	TraesCS1D02G190900.3	9.01522	6.25559e-05	protein RRC1-like
Up-regulated	1	O. compressus	Undisturbed	TraesCS4A02G216100.2	9.01012	1.23184e-05	lipase-like PAD4
Up-regulated	1	O. compressus	Undisturbed	TraesCS5D02G071900.2	8.96312	2.38572e-05	putative serine/threonine-protein kinase
Up-regulated	1	O. compressus	Undisturbed	TraesCS2D02G082200.2	8.95983	0.0111263	ribose-phosphate pyrophosphokinase 1, chloroplastic
Up-regulated	1	O. compressus	Undisturbed	TraesCS6A02G148500.3	8.94354	0.000507968	U2 snRNP-associated SURP motif-containing protein
Up-regulated	1	O. compressus	Undisturbed	TraesCS1A02G409600.4	8.93209	0.000491597	protein timeless homolog
Up-regulated	1	O. compressus	Undisturbed	TraesCS7D02G486900.2	8.92269	6.52049e-05	uncharacterized protein LOC109785922
Up-regulated	1	O. compressus	Undisturbed	TraesCS3A02G414100.3	8.92037	1.98743e-05	MYB-related protein
Up-regulated	1	O. compressus	Undisturbed	TraesCS1D02G266700.1	8.90297	6.63951e-05	Hexosyltransferase [Source:UniProtKB/TrEMBL;Acc:A0A1D5SU05]
Up-regulated	1	O. compressus	Undisturbed	TraesCS5A02G556400.2	8.89288	0.000200216	germinal center kinase 1-like
Up-regulated	1	O. compressus	Undisturbed	TraesCS3B02G385500.2	8.88553	2.37688e-05	V-type proton ATPase subunit a [Source:UniProtKB/TrEMBL;Acc:W5D6A6]
Up-regulated	1	O. compressus	Undisturbed	TraesCS2B02G367600.3	8.87774	0.000355132	GCN2-type protein kinase [Source:UniProtKB/TrEMBL;Acc:F4NAR5]
Up-regulated	1	O. compressus	Undisturbed	TraesCS4B02G209500.3	8.84081	3.74592e-05	uncharacterized protein
Up-regulated	1	O. compressus	Undisturbed	TraesCS5A02G068900.1	8.8315	8.03562e-05	myb family transcription factor EFM-like
Up-regulated	1	O. compressus	Undisturbed	TraesCS1D02G168300.2	8.83108	2.76824e-05	AB hydrolase superfamily protein yfhM
Up-regulated	1	O. compressus	Undisturbed	TraesCS5D02G074400.4	8.82969	0.000346809	Serine/threonine-protein kinase CTR1
Up-regulated	1	O. compressus	Undisturbed	TraesCS4D02G295000.1	8.82898	0.000108473	polyadenylate-binding protein-interacting protein 7-like
Up-regulated	1	O. compressus	Undisturbed	TraesCS1B02G176100.1	8.79987	4.93425e-15	pre-mRNA-processing protein 40C
Up-regulated	1	O. compressus	Undisturbed	TraesCS4D02G237100.2	8.7978	0.000330602	transcription factor bHLH137-like
Up-regulated	1	O. compressus	Undisturbed	TraesCS3B02G335100.2	8.79281	0.0016677	unnamed protein product
Up-regulated	1	O. compressus	Undisturbed	TraesCS7B02G062100.1	8.78499	0.000130782	Transcription factor bHLH82
Up-regulated	1	O. compressus	Undisturbed	TraesCS4A02G177800.4	8.78275	0.00455587	Nuclear pore complex protein Nup98-Nup96
Up-regulated	1	O. compressus	Undisturbed	TraesCS4A02G376900.2	8.7774	6.63951e-05	uncharacterized protein LOC109742552
Up-regulated	1	O. compressus	Undisturbed	TraesCS6D02G189700.3	8.72936	6.75053e-05	probable serine/threonine-protein kinase
Up-regulated	1	O. compressus	Undisturbed	TraesCS7A02G394500.4	8.71566	0.000530952	stromal processing peptidase, chloroplastic
Up-regulated	1	O. compressus	Undisturbed	TraesCS3B02G306400.3	8.70721	7.89733e-05	ABC transporter G family member 32-like
Up-regulated	1	O. compressus	Undisturbed	TraesCS5D02G314200.5	8.70688	4.26918e-05	uncharacterized protein LOC109751772
Up-regulated	1	O. compressus	Undisturbed	TraesCS1B02G283500.2	8.68679	0.00420798	uncharacterized protein LOC109753146
Up-regulated	1	O. compressus	Undisturbed	TraesCS6D02G028500.1	8.67697	0.000121026	disease resistance protein RPM1-like
Up-regulated	1	O. compressus	Undisturbed	TraesCS5B02G092900.2	8.66846	4.98183e-05	predicted protein
Up-regulated	1	O. compressus	Undisturbed	TraesCS1A02G063600.3	8.65586	0.00021753	uncharacterized protein LOC109762700
Up-regulated	1	O. compressus	Undisturbed	TraesCS2A02G426200.3	8.62426	0.000130668	putative ethylene constitutive triple response protein
Up-regulated	1	O. compressus	Undisturbed	TraesCS2B02G338300.4	8.6072	9.63212e-05	synaptonemal complex protein ZEP1-like
Up-regulated	1	O. compressus	Undisturbed	TraesCS5D02G292800.1	8.5879	7.03785e-05	Ribulose-phosphate 3-epimerase [Source:UniProtKB/TrEMBL;Acc:W5FW69]
Up-regulated	1	O. compressus	Undisturbed	TraesCS1B02G278600.3	8.57144	0.000119489	potassium channel AKT2
Up-regulated	1	O. compressus	Undisturbed	TraesCS5B02G570200.2	8.56881	0.000148914	4-hydroxyphenylacetaldehyde oxime monooxygenase-like
Up-regulated	1	O. compressus	Undisturbed	TraesCS3B02G113500.2	8.56115	0.000179793	probable staphylococcal-like nuclease CAN1
Up-regulated	1	O. compressus	Undisturbed	TraesCSU02G219600.1	8.54481	0.000490257	uncharacterized protein LOC107305514
Up-regulated	1	O. compressus	Undisturbed	TraesCS7B02G359400.2	8.54332	0.000128444	Mediator of RNA polymerase II transcription subunit 17 [Source:UniProtKB/TrEMBL;Acc:A0A341YVQ7]
Up-regulated	1	O. compressus	Undisturbed	TraesCS6B02G117100.1	8.54332	0.000128444	putative disease resistance protein RGA3
Up-regulated	1	O. compressus	Undisturbed	TraesCS7D02G326700.3	8.5416	7.98551e-05	uncharacterized protein LOC109785830
Up-regulated	1	O. compressus	Undisturbed	TraesCS7A02G096700.1	8.54147	0.000198832	Iron-sulfur assembly protein IscA, chloroplastic
Up-regulated	1	O. compressus	Undisturbed	TraesCS2B02G528900.1	8.52665	0.000331437	ABC transporter C family member 10-like
Up-regulated	1	O. compressus	Undisturbed	TraesCS2D02G378500.1	8.50106	9.73189e-05	histone-lysine N-methyltransferase SUVR4-lik
Up-regulated	1	O. compressus	Undisturbed	TraesCS2D02G018000.3	8.49514	0.000249619	Pectate lyase [Source:UniProtKB/TrEMBL;Acc:A0A1D5V059]
Up-regulated	1	O. compressus	Undisturbed	TraesCS7B02G183200.1	8.47499	0.00010022	protein SMAX1-like
Up-regulated	1	O. compressus	Undisturbed	TraesCS6B02G013700.11	8.45938	0.000113043	hypothetical protein TRIUR3_03439
Up-regulated	1	O. compressus	Undisturbed	TraesCS5B02G121500.1	8.43864	0.00814644	3'(2'),5'-bisphosphate nucleotidase-like
Up-regulated	1	O. compressus	Undisturbed	TraesCS2D02G455600.3	8.4365	0.000238636	Glutamate receptor [Source:UniProtKB/TrEMBL;Acc:A0A1D5URP8]
Up-regulated	1	O. compressus	Undisturbed	TraesCS3A02G033400.10	8.43369	0.000200962	N/A
Up-regulated	1	O. compressus	Undisturbed	TraesCS6A02G052100.2	8.43253	0.000122888	probable serine/threonine-protein kinase
Up-regulated	1	O. compressus	Undisturbed	TraesCS1D02G276100.5	8.39579	0.00087064	transcription factor TGAL5-like
Up-regulated	1	O. compressus	Undisturbed	TraesCS5A02G144600.1	8.38964	0.00553241	probable serine/threonine-protein kinase PBL8
Up-regulated	1	O. compressus	Undisturbed	TraesCS5A02G095100.2	8.36777	0.000153864	Conserved oligomeric Golgi complex subunit 8 [Source:UniProtKB/TrEMBL;Acc:A0A1D5YSC0]
Up-regulated	1	O. compressus	Undisturbed	TraesCS5B02G080300.3	8.32699	0.000231838	Hexosyltransferase [Source:UniProtKB/TrEMBL;Acc:A0A341VAG7]
Up-regulated	1	O. compressus	Undisturbed	TraesCS5B02G228300.1	8.32398	0.000261202	fructose-bisphosphate aldolase-lysine N-methyltransferase, chloroplastic
Up-regulated	1	O. compressus	Undisturbed	TraesCS1A02G384200.1	8.30393	0.00175564	DNA replication complex GINS protein PSF2 [Source:UniProtKB/TrEMBL;Acc:A0A1D5RZZ3]
Up-regulated	1	O. compressus	Undisturbed	TraesCS6B02G421000.2	8.28849	0.000527103	translation initiation factor eIF-2B subunit epsilon-like
Up-regulated	1	O. compressus	Undisturbed	TraesCS7A02G296900.2	8.27461	0.00179308	helicase-like transcription factor CHR28
Up-regulated	1	O. compressus	Undisturbed	TraesCS1B02G393400.1	8.26959	0.000223001	E3 ubiquitin ligase BIG BROTHER-related protein
Up-regulated	1	O. compressus	Undisturbed	TraesCS4D02G180900.1	8.25443	0.00216676	light-mediated development protein DET1-like
Up-regulated	1	O. compressus	Undisturbed	TraesCS5D02G260800.1	8.23125	0.00132005	cellulose synthase-like protein E6
Up-regulated	1	O. compressus	Undisturbed	TraesCS3A02G012800.1	8.23071	0.000324111	pentatricopeptide repeat-containing protein At1g63070, mitochondrial-like
Up-regulated	1	O. compressus	Undisturbed	TraesCS6B02G084500.2	8.20235	0.00839665	serine/threonine-protein kinase Nek3-like
Up-regulated	1	O. compressus	Undisturbed	TraesCS5A02G466100.2	8.20105	0.00556029	Mg-protoporphyrin IX chelatase [Source:UniProtKB/TrEMBL;Acc:A0A1D5YP74]
Up-regulated	1	O. compressus	Undisturbed	TraesCS5D02G013600.3	8.17244	0.000335724	uncharacterized protein LOC109753229
Up-regulated	1	O. compressus	Undisturbed	TraesCS2B02G255700.3	8.16989	0.000358765	WD40-repeat protein B
Up-regulated	1	O. compressus	Undisturbed	TraesCS7D02G323000.1	8.15806	0.00093715	S-acyltransferase [Source:UniProtKB/TrEMBL;Acc:A0A1D6CTA0]
Up-regulated	1	O. compressus	Undisturbed	TraesCS4B02G182100.2	8.15346	0.000382135	protein high chlorophyll fluorescent 107
Up-regulated	1	O. compressus	Undisturbed	TraesCS4A02G126800.2	8.15219	0.0029628	Non-specific serine/threonine protein kinase [Source:UniProtKB/TrEMBL;Acc:A0A1D5XAP3]
Up-regulated	1	O. compressus	Undisturbed	TraesCS7A02G148600.2	8.1472	0.00047545	Receptor-like protein kinase
Up-regulated	1	O. compressus	Undisturbed	TraesCS6A02G063300.1	8.13936	0.000389221	serine/threonine-protein kinase Nek3-like
Up-regulated	1	O. compressus	Undisturbed	TraesCS5D02G568300.4	8.13222	4.93425e-15	protein EXPORTIN 1A-like
Up-regulated	1	O. compressus	Undisturbed	TraesCS7A02G458000.3	8.13143	0.000545433	uncharacterized protein LOC109761820
Up-regulated	1	O. compressus	Undisturbed	TraesCS5A02G158800.3	8.09148	0.000974442	uncharacterized protein LOC109787646
Up-regulated	1	O. compressus	Undisturbed	TraesCS5A02G412100.2	8.06302	0.00261135	uncharacterized protein LOC109781376
Up-regulated	1	O. compressus	Undisturbed	TraesCS5B02G416900.2	8.04788	0.000587682	calmodulin-binding protein 60 F-like
Up-regulated	1	O. compressus	Undisturbed	TraesCS3A02G351500.2	8.03157	0.00818653	Dual specificity protein kinase pom1
Up-regulated	1	O. compressus	Undisturbed	TraesCS2B02G267300.1	8.01556	0.00255768	differentially expressed in FDCP 6
Up-regulated	1	O. compressus	Undisturbed	TraesCS7B02G348600.2	7.99329	0.000702988	external alternative NAD(P)H-ubiquinone oxidoreductase B1, mitochondria
Up-regulated	1	O. compressus	Undisturbed	TraesCS2D02G235300.1	7.9888	0.00691424	E3 ubiquitin protein ligase RIN2-like
Up-regulated	1	O. compressus	Undisturbed	TraesCS2B02G272600.1	7.94187	0.00107615	WPP domain-associated protein-like
Up-regulated	1	O. compressus	Undisturbed	TraesCS5B02G182800.2	7.94138	0.00839344	isoform X2 [Aegilops tauschii subsp. tauschii]
Up-regulated	1	O. compressus	Undisturbed	TraesCS1B02G019100.2	7.93642	0.000872728	ras-related protein RABD1-like
Up-regulated	1	O. compressus	Undisturbed	TraesCS1B02G466300.2	7.92919	0.00199513	phosphoglucan phosphatase LSF1, chloroplastic
Up-regulated	1	O. compressus	Undisturbed	TraesCS4B02G124100.3	7.92566	0.00153543	uncharacterized protein LOC109761925
Up-regulated	1	O. compressus	Undisturbed	TraesCS5D02G299600.2	7.91777	0.0027341	uncharacterized protein At4g22758
Up-regulated	1	O. compressus	Undisturbed	TraesCS1D02G289200.4	7.90874	0.00556554	ecotropic viral integration site 5 protein homolog
Up-regulated	1	O. compressus	Undisturbed	TraesCS7B02G143600.2	7.86481	0.00850692	plant intracellular Ras-group-related LRR protein 4-like
Up-regulated	1	O. compressus	Undisturbed	TraesCS3A02G408200.2	7.84883	0.00138263	Bidirectional sugar transporter SWEET [Source:UniProtKB/TrEMBL;Acc:A0A1D5VCJ6]
Up-regulated	1	O. compressus	Undisturbed	TraesCS5D02G314200.6	7.83473	0.00388966	uncharacterized protein LOC109751772
Up-regulated	1	O. compressus	Undisturbed	TraesCS7D02G366300.1	7.80443	0.00366397	tRNA A64-2'-O-ribosylphosphate transferase
Up-regulated	1	O. compressus	Undisturbed	TraesCS7B02G150600.7	7.78592	0.00155354	Calcium-transporting ATPase [Source:UniProtKB/TrEMBL;Acc:A0A341YSV0]
Up-regulated	1	O. compressus	Undisturbed	TraesCS2B02G240800.1	7.78592	0.00155354	cysteine-rich receptor kinase
Up-regulated	1	O. compressus	Undisturbed	TraesCS2D02G312800.2	7.78317	0.00176927	uncharacterized protein LOC109747607
Up-regulated	1	O. compressus	Undisturbed	TraesCS3B02G345700.1	7.75513	0.00288478	WD repeat-containing protein 13
Up-regulated	1	O. compressus	Undisturbed	TraesCS2B02G187800.1	7.72812	0.00246118	leucine-rich repeat extensin-like protein 6
Up-regulated	1	O. compressus	Undisturbed	TraesCS3A02G255000.7	7.72241	0.00183941	phosphatidylinositol/phosphatidylcholine transfer protein SFH6-like
Up-regulated	1	O. compressus	Undisturbed	TraesCSU02G068800.1	7.71988	0.00195778	probable protein phosphatase 2C 12
Up-regulated	1	O. compressus	Undisturbed	TraesCS1A02G159500.1	7.69796	0.00842789	putative receptor-like protein kinase At4g00960
Up-regulated	1	O. compressus	Undisturbed	TraesCS4D02G114200.1	7.68861	0.00319638	HVA22-like protein [Source:UniProtKB/TrEMBL;Acc:W5ERX9]
Up-regulated	1	O. compressus	Undisturbed	TraesCS3D02G176600.3	7.6559	0.00303043	5'-nucleotidase domain-containing protein 4
Up-regulated	1	O. compressus	Undisturbed	TraesCS3D02G100200.1	7.65299	0.002599	unnamed protein product
Up-regulated	1	O. compressus	Undisturbed	TraesCS5B02G160000.1	7.64941	4.80353e-09	CCR4-NOT transcription complex subunit 10
Up-regulated	1	O. compressus	Undisturbed	TraesCS5B02G153900.3	7.64231	0.00321124	Glucan endo-1,3-beta-glucosidase 4
Up-regulated	1	O. compressus	Undisturbed	TraesCSU02G034700.1	7.63209	0.00354183	uncharacterized protein LOC109783076
Up-regulated	1	O. compressus	Undisturbed	TraesCS3D02G164900.2	7.62907	0.00292823	putative ubiquitin-conjugating enzyme E2 38
Up-regulated	1	O. compressus	Undisturbed	TraesCS7D02G391600.2	7.61853	0.00337932	histone-lysine N-methyltransferase ATXR4
Up-regulated	1	O. compressus	Undisturbed	TraesCS6A02G181300.1	7.61163	0.00497787	DEAD-box ATP-dependent RNA helicase 41
Up-regulated	1	O. compressus	Undisturbed	TraesCS3D02G042300.2	7.59958	0.00286794	deoxyhypusine synthase
Up-regulated	1	O. compressus	Undisturbed	TraesCS7A02G371200.2	7.53765	0.00599665	protein argonaute PNH1
Up-regulated	1	O. compressus	Undisturbed	TraesCS5B02G141100.2	7.53729	0.00800862	probable inactive serine/threonine-protein kinase bub1
Up-regulated	1	O. compressus	Undisturbed	TraesCS4B02G090100.2	7.52617	0.00395186	GTPase Der
Up-regulated	1	O. compressus	Undisturbed	TraesCS7A02G286700.4	7.48073	0.00833757	peptidyl-prolyl cis-trans isomerase, chloroplastic
Up-regulated	1	O. compressus	Undisturbed	TraesCS6B02G367400.2	7.46592	0.00455587	uncharacterized protein LOC109751341
Up-regulated	1	O. compressus	Undisturbed	TraesCS3D02G182300.3	7.43612	0.00517461	probable serine/threonine-protein kinase PBL7
Up-regulated	1	O. compressus	Undisturbed	TraesCS5B02G054200.1	7.36131	0.00943246	NAC transcription factor 6A [Source:UniProtKB/TrEMBL;Acc:A0A088AX61]
Up-regulated	1	O. compressus	Undisturbed	TraesCS1A02G313500.4	7.35328	0.0060129	polyubiquitin-like
Up-regulated	1	O. compressus	Undisturbed	TraesCS1B02G243900.1	7.34503	0.00999404	putative E3 ubiquitin-protein ligase LIN-1
Up-regulated	1	O. compressus	Undisturbed	TraesCS2A02G510800.1	7.33199	0.0103599	probable isoaspartyl peptidase/L-asparaginase 2
Up-regulated	1	O. compressus	Undisturbed	TraesCS2D02G131900.2	7.33199	0.0103599	unnamed protein product
Up-regulated	1	O. compressus	Undisturbed	TraesCS6B02G328900.1	7.29532	0.00765088	nicastrin
Up-regulated	1	O. compressus	Undisturbed	TraesCS4A02G177900.1	7.29124	0.00693319	protein CHUP1, chloroplastic-like
Up-regulated	1	O. compressus	Undisturbed	TraesCS1D02G048200.1	7.19186	0.0119783	Potassium transporter [Source:UniProtKB/TrEMBL;Acc:A0A341PNN5]
Up-regulated	1	O. compressus	Undisturbed	TraesCS5B02G261000.2	7.16097	0.0110853	E3 ubiquitin-protein ligase UPL5
Up-regulated	1	O. compressus	Undisturbed	TraesCS4B02G178100.2	7.15891	0.0128442	Non-specific serine/threonine protein kinase [Source:UniProtKB/TrEMBL;Acc:A0A0D3R0R3]
Up-regulated	1	O. compressus	Undisturbed	TraesCS4B02G143600.1	7.13022	0.0127329	uncharacterized protein LOC109741933
Up-regulated	1	O. compressus	Undisturbed	TraesCS2B02G067300.3	7.12509	0.0125097	uncharacterized protein LOC109781546
Up-regulated	1	O. compressus	Undisturbed	TraesCS3D02G543400.3	6.27685	0.0008888	E3 SUMO-protein ligase SIZ1-like
Up-regulated	1	O. compressus	Undisturbed	TraesCS2A02G128100.1	6.22878	0.000721877	RNA pseudourine synthase 6, chloroplastic
Up-regulated	1	O. compressus	Undisturbed	TraesCS5B02G260000.1	5.99308	0.018631	Eukaryotic translation initiation factor 3 subunit E [Source:UniProtKB/TrEMBL;Acc:W5F8V5]
Up-regulated	1	O. compressus	Undisturbed	TraesCS5B02G132600.2	5.97296	4.24919e-05	L-galactono-1,4-lactone dehydrogenase [Source:UniProtKB/TrEMBL;Acc:W5FJN8]
Up-regulated	1	O. compressus	Undisturbed	TraesCS5B02G182500.2	5.89025	0.0168886	Glucose-6-phosphate 1-epimerase [Source:UniProtKB/TrEMBL;Acc:W5FCH4]
Up-regulated	1	O. compressus	Undisturbed	TraesCS6B02G215100.3	5.86505	0.000200856	serine/threonine-protein kinase EDR1
Up-regulated	1	O. compressus	Undisturbed	TraesCS1A02G001900.8	5.7352	0.00092518	peroxisomal membrane protein PEX14-like
Up-regulated	1	O. compressus	Undisturbed	TraesCS6B02G344100.1	5.73514	1.83961e-13	Peptidylprolyl isomerase [Source:UniProtKB/TrEMBL;Acc:A0A341X1J7]
Up-regulated	1	O. compressus	Undisturbed	TraesCS4B02G148500.2	5.71489	0.00206747	probable pre-mRNA-splicing factor ATP-dependent RNA helicase DEAH5
Up-regulated	1	O. compressus	Undisturbed	TraesCS4B02G127400.3	5.63758	0.00784606	RGS domain-containing serine/threonine-protein kinase A-like
Up-regulated	1	O. compressus	Undisturbed	TraesCS3B02G312900.1	5.59492	0.0168757	polynucleotide 3'-phosphatase ZDP
Up-regulated	1	O. compressus	Undisturbed	TraesCS2D02G217100.2	5.54603	0.00422481	mixed-linked glucan synthase 3
Up-regulated	1	O. compressus	Undisturbed	TraesCS3B02G210800.2	5.46613	0.0255433	putative F-box protein At2g02030
Up-regulated	1	O. compressus	Undisturbed	TraesCS5D02G333700.2	5.45768	0.0146886	DNA-(apurinic or apyrimidinic site) lyase 2
Up-regulated	1	O. compressus	Undisturbed	TraesCS2D02G401800.3	5.43705	0.0120039	protein LAZ1-like
Up-regulated	1	O. compressus	Undisturbed	TraesCS5B02G295000.2	5.2959	0.0226843	beta-glucosidase 32
Up-regulated	1	O. compressus	Undisturbed	TraesCS4A02G183400.3	5.25809	0.0143973	transcription factor TGAL4-like
Up-regulated	1	O. compressus	Undisturbed	TraesCS3A02G424900.3	5.18677	0.00207968	protein CPR-5-like
Up-regulated	1	O. compressus	Undisturbed	TraesCS2A02G349200.2	5.14628	0.049134	eIF-2-alpha kinase GCN2
Up-regulated	1	O. compressus	Undisturbed	TraesCS4B02G235400.2	4.98834	0.0346204	Branched-chain-amino-acid aminotransferase [Source:UniProtKB/TrEMBL;Acc:A0A1D5XL05]
Up-regulated	1	O. compressus	Undisturbed	TraesCS3B02G276100.2	4.96177	0.0047196	probable inactive tRNA-specific adenosine deaminase-like protein 3
Up-regulated	1	O. compressus	Undisturbed	TraesCS7D02G447100.2	4.65523	0.0168067	Mediator of RNA polymerase II transcription subunit 17 [Source:UniProtKB/TrEMBL;Acc:A0A1D6CU38]
Up-regulated	1	O. compressus	Undisturbed	TraesCS3D02G330500.1	4.5559	9.93578e-06	ADP-ribosylation factor 2
Up-regulated	1	O. compressus	Undisturbed	TraesCS1B02G094300.2	4.47611	0.0264097	triose phosphate/phosphate translocator, chloroplastic-like
Up-regulated	1	O. compressus	Undisturbed	TraesCS3D02G482500.2	4.43396	6.3953e-07	crossover junction endonuclease MUS81-like
Up-regulated	1	O. compressus	Undisturbed	TraesCS3D02G237200.1	3.97395	0.0163105	membrane-bound transcription factor site-2 protease homolog
Up-regulated	1	O. compressus	Undisturbed	TraesCS7D02G219800.1	3.86754	0.0278403	uncharacterized membrane protein At1g06890-like
Up-regulated	1	O. compressus	Undisturbed	TraesCS4A02G177900.2	3.71791	0.0469277	protein CHUP1, chloroplastic-like
Up-regulated	1	O. compressus	Undisturbed	TraesCS1A02G072000.2	3.59717	0.00538403	Glutamate--cysteine ligase B, chloroplastic
Up-regulated	1	O. compressus	Undisturbed	TraesCS2D02G388800.1	3.56366	5.88824e-08	Glutamate dehydrogenase [Source:UniProtKB/TrEMBL;Acc:A0A341REK8]
Up-regulated	1	O. compressus	Undisturbed	TraesCS3B02G363300.1	3.43335	0.0257698	stomatal closure-related actin-binding protein 1
Up-regulated	1	O. compressus	Undisturbed	TraesCS5B02G200600.3	3.42223	0.0480478	Phospholipase D [Source:UniProtKB/TrEMBL;Acc:A0A341VUR5]
Up-regulated	1	O. compressus	Undisturbed	TraesCS4A02G141000.2	3.3374	0.0012461	Nuclear pore protein [Source:UniProtKB/TrEMBL;Acc:A0A1D6RW56]
Up-regulated	1	O. compressus	Undisturbed	TraesCS5D02G211200.1	3.28542	0.000141781	protein TIFY 6b
Up-regulated	1	O. compressus	Undisturbed	TraesCS4A02G046800.1	3.26669	0.00102663	Calcium-transporting ATPase
Up-regulated	1	O. compressus	Undisturbed	TraesCS6A02G109100.2	2.97079	1.68129e-05	Protein arginine N-methyltransferase [Source:UniProtKB/TrEMBL;Acc:W5GEQ9]
Up-regulated	1	O. compressus	Undisturbed	TraesCS5A02G484200.2	2.88884	0.000430522	Urease [Source:UniProtKB/TrEMBL;Acc:A0A1D5YGP1]
Up-regulated	1	O. compressus	Undisturbed	TraesCS1B02G158300.1	2.85555	0.00619994	protein GDAP2 homolog
Up-regulated	1	O. compressus	Undisturbed	TraesCS1D02G084000.1	2.82271	0.029075	chromatin structure-remodeling complex protein BSH
Up-regulated	1	O. compressus	Undisturbed	TraesCS1D02G303900.4	2.79606	0.000467782	probable NOT transcription complex subunit VIP2
Up-regulated	1	O. compressus	Undisturbed	TraesCS1D02G164800.2	2.7926	0.0147224	Malic enzyme [Source:UniProtKB/TrEMBL;Acc:A0A1D5SWJ9]
Up-regulated	1	O. compressus	Undisturbed	TraesCS1B02G215800.3	2.5047	1.84036e-07	Monosaccharide-sensing protein 2
Up-regulated	1	O. compressus	Undisturbed	TraesCS2A02G565800.2	2.4763	0.0228092	disease resistance protein RPM1-like
Up-regulated	1	O. compressus	Undisturbed	TraesCS5B02G085400.2	2.36789	2.78044e-05	Nuclear/nucleolar GTPase 2 [Source:UniProtKB/TrEMBL;Acc:A0A341VQ60]
Up-regulated	1	O. compressus	Undisturbed	TraesCS7D02G373100.1	2.3417	0.0371644	Thiamine thiazole synthase, chloroplastic [Source:UniProtKB/TrEMBL;Acc:W5HZJ1]
Up-regulated	1	O. compressus	Undisturbed	TraesCS3B02G139700.1	2.33897	0.00814812	valine--tRNA ligase, mitochondrial 1-like
Up-regulated	1	O. compressus	Undisturbed	TraesCS2D02G000600.1	2.33359	0.0239454	polycomb group protein EMBRYONIC FLOWER 2-like
Up-regulated	1	O. compressus	Undisturbed	TraesCS5B02G290900.4	2.3194	0.0412141	uncharacterized protein LOC109744522
Up-regulated	1	O. compressus	Undisturbed	TraesCS3A02G496300.1	2.29145	0.0291976	THO complex subunit 2-like
Up-regulated	1	O. compressus	Undisturbed	TraesCS5A02G132300.1	2.23102	0.0362973	L-galactono-1,4-lactone dehydrogenase
Up-regulated	1	O. compressus	Undisturbed	TraesCS1D02G438000.2	2.20911	0.0127329	Structural maintenance of chromosomes protein [Source:UniProtKB/TrEMBL;Acc:A0A341Q231]
Up-regulated	1	O. compressus	Undisturbed	TraesCS6B02G231700.1	2.20774	0.0264097	ubiquitin carboxyl-terminal hydrolase 15-like
Up-regulated	1	O. compressus	Undisturbed	TraesCS4A02G388200.3	2.14929	0.0108968	Coatomer subunit beta' [Source:UniProtKB/TrEMBL;Acc:A0A1D6D921]
Up-regulated	1	O. compressus	Undisturbed	TraesCS3D02G237300.2	2.14493	0.00902184	Arp2/3 complex 34 kDa subunit [Source:UniProtKB/TrEMBL;Acc:W5D8K2]
Up-regulated	1	O. compressus	Undisturbed	TraesCS7D02G288100.1	2.12698	0.00259005	glucose-6-phosphate/phosphate translocator 2, chloroplastic-like
Up-regulated	1	O. compressus	Undisturbed	TraesCSU02G065300.3	1.94411	0.00108975	protein argonaute 1B-like
Up-regulated	1	O. compressus	Undisturbed	TraesCS6B02G236800.2	1.9433	0.0206945	protein NBR1 homolog
Up-regulated	1	O. compressus	Undisturbed	TraesCS2B02G408600.1	1.93811	0.00286225	Poly(U)-specific endoribonuclease-B
Up-regulated	1	O. compressus	Undisturbed	TraesCS7B02G269000.5	1.84815	0.0270961	cell division cycle and apoptosis regulator protein 1-like
Up-regulated	1	O. compressus	Undisturbed	TraesCS2A02G352800.4	1.84734	0.0218214	Endoglucanase [Source:UniProtKB/TrEMBL;Acc:A0A341Q8R4]
Up-regulated	1	O. compressus	Undisturbed	TraesCS7B02G183300.2	1.79089	0.00321135	Glucose-1-phosphate adenylyltransferase [Source:UniProtKB/TrEMBL;Acc:C0KWE8]
Up-regulated	1	O. compressus	Undisturbed	TraesCS7A02G478100.3	1.63313	0.0167042	Glyceraldehyde-3-phosphate dehydrogenase [Source:UniProtKB/TrEMBL;Acc:A0A1D6BHY6]
Up-regulated	1	O. compressus	Undisturbed	TraesCS7D02G403300.2	1.44353	0.0463464	Peptidyl-prolyl cis-trans isomerase [Source:UniProtKB/TrEMBL;Acc:A0A1D6CMR8]
Up-regulated	1	O. compressus	Undisturbed	TraesCS6D02G167200.6	1.44301	0.0346204	peptidyl-prolyl cis-trans isomerase CYP95
Up-regulated	1	O. compressus	Undisturbed	TraesCS2A02G132900.5	1.33443	0.0176033	protein transport protein SEC31 homolog B
Up-regulated	1	O. compressus	Undisturbed	TraesCS7A02G020200.2	1.25797	0.0429734	60S ribosomal protein L9
Up-regulated	1	O. compressus	Undisturbed	TraesCS1B02G273900.1	1.20382	0.0482649	cytochrome c
Up-regulated	1	O. compressus	Undisturbed	TraesCS2B02G052400.1	1.08279	0.0496606	disease resistance protein Pik-2
Tags	Week	Previous host	Disturbance	Name	logFC	FDR	Description
Up-regulated	1	L. rigidum	Undisturbed	TraesCS5B02G022800.1	13.6032	2.63186e-47	5-methyltetrahydropteroyltriglutamate--homocysteine methyltransferase 1-like
Up-regulated	1	L. rigidum	Undisturbed	TraesCS1A02G323400.1	12.6552	5.91525e-33	sulfite reductase
Up-regulated	1	L. rigidum	Undisturbed	TraesCS7D02G299500.1	12.394	7.02269e-09	chloroplast MDAR6 protein
Up-regulated	1	L. rigidum	Undisturbed	TraesCS6D02G376900.2	12.3109	8.01009e-29	Acetyl-coenzyme A synthetase
Up-regulated	1	L. rigidum	Undisturbed	TraesCS5B02G376200.2	12.1782	7.80894e-16	DNA-directed RNA polymerase subunit beta
Up-regulated	1	L. rigidum	Undisturbed	TraesCS4A02G083300.2	12.1725	4.56349e-10	TOPLESS
Up-regulated	1	L. rigidum	Undisturbed	TraesCS1B02G234400.4	11.8765	1.97216e-19	uncharacterized protein
Up-regulated	1	L. rigidum	Undisturbed	TraesCS5A02G532500.2	11.8174	1.76538e-20	mediator of RNA polymerase II transcription subunit 12
Up-regulated	1	L. rigidum	Undisturbed	TraesCS3D02G197700.1	11.6796	1.18736e-20	Kinesin-like protein
Up-regulated	1	L. rigidum	Undisturbed	TraesCS3D02G302800.2	11.6714	3.13095e-21	DExH-box ATP-dependent RNA helicase DExH6
Up-regulated	1	L. rigidum	Undisturbed	TraesCS5D02G283100.2	11.6497	1.34523e-20	spindle pole body component 110-like
Up-regulated	1	L. rigidum	Undisturbed	TraesCS4D02G306200.4	11.6143	2.53845e-20	protein PIR
Up-regulated	1	L. rigidum	Undisturbed	TraesCS7D02G365600.1	11.5345	7.65073e-13	nuclear poly(A) polymerase 4-like
Up-regulated	1	L. rigidum	Undisturbed	TraesCS2B02G408600.2	11.5189	2.12337e-19	Poly(U)-specific endoribonuclease-B
Up-regulated	1	L. rigidum	Undisturbed	TraesCS2D02G141500.2	11.4724	8.66926e-19	RNA ligase isoform 1
Up-regulated	1	L. rigidum	Undisturbed	TraesCS3D02G195600.1	11.4724	5.8355e-14	Coatomer subunit beta
Up-regulated	1	L. rigidum	Undisturbed	TraesCS4B02G181400.3	11.4582	1.18977e-18	Histone-lysine N-methyltransferase
Up-regulated	1	L. rigidum	Undisturbed	TraesCS5D02G328300.2	11.4484	1.97296e-14	Lon protease homolog 2, peroxisomal
Up-regulated	1	L. rigidum	Undisturbed	TraesCS7D02G269500.1	11.4307	1.16826e-16	putative protein NAP1
Up-regulated	1	L. rigidum	Undisturbed	TraesCS3A02G317700.1	11.4223	1.30237e-18	helicase-like transcription factor CHR28
Up-regulated	1	L. rigidum	Undisturbed	TraesCS7A02G360700.2	11.4126	4.40845e-15	Phospholipid-transporting ATPase
Up-regulated	1	L. rigidum	Undisturbed	TraesCS7D02G206700.3	11.4044	8.51782e-15	uncharacterized protein
Up-regulated	1	L. rigidum	Undisturbed	TraesCS2D02G114500.4	11.3625	4.68893e-09	uncharacterized protein
Up-regulated	1	L. rigidum	Undisturbed	TraesCS4B02G037700.3	11.3561	6.70457e-18	Lipoxygenase
Up-regulated	1	L. rigidum	Undisturbed	TraesCS6D02G127600.2	11.3204	1.69425e-16	Auxin response factor
Up-regulated	1	L. rigidum	Undisturbed	TraesCS5B02G183500.1	11.1647	5.37292e-10	ABC transporter G family member 53
Up-regulated	1	L. rigidum	Undisturbed	TraesCS7A02G049000.1	11.1302	5.54053e-08	Cyclin-dependent kinase F-4
Up-regulated	1	L. rigidum	Undisturbed	TraesCS6B02G161800.5	11.048	3.49281e-15	DExH-box ATP-dependent RNA helicase DExH11
Up-regulated	1	L. rigidum	Undisturbed	TraesCS1A02G001900.9	11.0391	3.49281e-15	peroxisomal membrane protein PEX14
Up-regulated	1	L. rigidum	Undisturbed	TraesCS5D02G292700.2	11.0336	4.90311e-15	Uridine kinase
Up-regulated	1	L. rigidum	Undisturbed	TraesCS3A02G342500.2	11.0165	3.95953e-11	Ubiquitin-conjugating enzyme E2-17 kDa
Up-regulated	1	L. rigidum	Undisturbed	TraesCS5B02G371800.1	11.0084	1.38338e-12	serine/threonine-protein kinase AFC2-like
Up-regulated	1	L. rigidum	Undisturbed	TraesCS1D02G245900.1	11.0081	2.23316e-07	argininosuccinate synthase, chloroplastic
Up-regulated	1	L. rigidum	Undisturbed	TraesCS3A02G391200.1	10.9868	8.51782e-15	fructose-1,6-bisphosphate aldolase 10
Up-regulated	1	L. rigidum	Undisturbed	TraesCS7D02G288100.2	10.984	1.94957e-14	glucose-6-phosphate/phosphate translocator 2, chloroplastic-like
Up-regulated	1	L. rigidum	Undisturbed	TraesCS7D02G449900.2	10.9393	8.74579e-14	Auxin response factor
Up-regulated	1	L. rigidum	Undisturbed	TraesCS1B02G267000.2	10.9195	1.44694e-11	uncharacterized protein
Up-regulated	1	L. rigidum	Undisturbed	TraesCS3A02G251000.2	10.8773	4.60073e-11	receptor-like serine/threonine-protein kinase
Up-regulated	1	L. rigidum	Undisturbed	TraesCS1A02G107800.4	10.8326	2.78883e-11	arginine--tRNA ligase, cytoplasmic-like
Up-regulated	1	L. rigidum	Undisturbed	TraesCS6B02G208900.6	10.7868	4.49836e-09	peptidyl-prolyl cis-trans isomerase CYP95
Up-regulated	1	L. rigidum	Undisturbed	TraesCS7D02G535400.2	10.78	1.62442e-12	Starch branching enzyme 1
Up-regulated	1	L. rigidum	Undisturbed	TraesCS4D02G193100.1	10.7697	4.3196e-13	rab3 GTPase-activating protein catalytic subunit
Up-regulated	1	L. rigidum	Undisturbed	TraesCS3A02G251000.3	10.7524	2.52878e-06	receptor-like serine/threonine-protein kinase
Up-regulated	1	L. rigidum	Undisturbed	TraesCS1D02G255700.2	10.7461	1.52919e-12	uncharacterized protein
Up-regulated	1	L. rigidum	Undisturbed	TraesCS1B02G123400.2	10.7298	8.46422e-13	E3 ubiquitin-protein ligase UPL6
Up-regulated	1	L. rigidum	Undisturbed	TraesCS1B02G334600.2	10.7094	3.24946e-12	acylamino-acid-releasing enzyme 1
Up-regulated	1	L. rigidum	Undisturbed	TraesCS5D02G184100.1	10.6897	5.94628e-11	mediator complex subunit 25
Up-regulated	1	L. rigidum	Undisturbed	TraesCS3B02G123300.3	10.6788	4.46498e-11	proline-rich receptor-like protein kinase
Up-regulated	1	L. rigidum	Undisturbed	TraesCS1A02G278100.2	10.6758	5.81651e-12	Arginyl-tRNA--protein transferase
Up-regulated	1	L. rigidum	Undisturbed	TraesCS3A02G023200.2	10.6728	2.5157e-12	putative plasma membrane Na+/H+ antiporter
Up-regulated	1	L. rigidum	Undisturbed	TraesCS3A02G259200.1	10.6275	7.3946e-12	uncharacterized protein
Up-regulated	1	L. rigidum	Undisturbed	TraesCS7B02G295600.2	10.613	7.5584e-12	Potassium transporter
Up-regulated	1	L. rigidum	Undisturbed	TraesCS3B02G238300.1	10.5914	5.75329e-11	uncharacterized protein
Up-regulated	1	L. rigidum	Undisturbed	TraesCS7A02G231400.2	10.5807	2.90867e-11	tRNA(adenine(34)) deaminase, chloroplastic
Up-regulated	1	L. rigidum	Undisturbed	TraesCS1B02G176100.2	10.5641	1.44175e-11	pre-mRNA-processing protein 40C
Up-regulated	1	L. rigidum	Undisturbed	TraesCS2B02G248600.3	10.5609	3.33376e-10	serine/arginine repetitive matrix protein 2-like
Up-regulated	1	L. rigidum	Undisturbed	TraesCS4B02G181700.2	10.5282	0.00181181	uncharacterized protein
Up-regulated	1	L. rigidum	Undisturbed	TraesCS2D02G229000.8	10.5213	9.49318e-11	serine/arginine repetitive matrix protein 2-like
Up-regulated	1	L. rigidum	Undisturbed	TraesCS5A02G118700.1	10.5202	2.71612e-11	filament-like plant protein 2
Up-regulated	1	L. rigidum	Undisturbed	TraesCS6B02G183600.1	10.4912	3.34219e-05	succinate-semialdehyde dehydrogenase, mitochondrial
Up-regulated	1	L. rigidum	Undisturbed	TraesCS1B02G222600.2	10.4742	3.58143e-09	uncharacterized protein
Up-regulated	1	L. rigidum	Undisturbed	TraesCS4B02G258300.2	10.4686	1.57547e-10	uncharacterized protein
Up-regulated	1	L. rigidum	Undisturbed	TraesCSU02G183200.1	10.4618	0.004873	rRNA N-glycosidase
Up-regulated	1	L. rigidum	Undisturbed	TraesCS2D02G000600.2	10.4617	7.40231e-11	polycomb group protein EMBRYONIC FLOWER 2
Up-regulated	1	L. rigidum	Undisturbed	TraesCS6B02G151700.2	10.4529	1.3266e-10	Disease resistance protein RPM1
Up-regulated	1	L. rigidum	Undisturbed	TraesCS2B02G376100.3	10.4447	6.53726e-10	trafficking protein particle complex II-specific subunit 120 homolog
Up-regulated	1	L. rigidum	Undisturbed	TraesCS5A02G275800.2	10.4431	2.96798e-08	spindle pole body component 110-like
Up-regulated	1	L. rigidum	Undisturbed	TraesCS3D02G258300.1	10.4024	1.58622e-09	ABC transporter B family member
Up-regulated	1	L. rigidum	Undisturbed	TraesCS5B02G322000.2	10.4006	4.06203e-10	Lon protease homolog 2, peroxisomal
Up-regulated	1	L. rigidum	Undisturbed	TraesCS5D02G562400.2	10.4006	3.55758e-09	uncharacterized protein LOC109733667
Up-regulated	1	L. rigidum	Undisturbed	TraesCS2D02G419000.2	10.3909	3.54449e-10	Potassium transporter
Up-regulated	1	L. rigidum	Undisturbed	TraesCS5A02G005500.1	10.3708	5.54053e-08	protein ALWAYS EARLY 2-like
Up-regulated	1	L. rigidum	Undisturbed	TraesCS4B02G068000.2	10.3636	9.79606e-08	protein phosphatase inhibitor 2
Up-regulated	1	L. rigidum	Undisturbed	TraesCS2A02G565800.1	10.3241	1.81493e-09	Disease resistance protein RPM1
Up-regulated	1	L. rigidum	Undisturbed	TraesCS2A02G422600.1	10.3134	2.0622e-09	Potassium transporter
Up-regulated	1	L. rigidum	Undisturbed	TraesCS1B02G278600.1	10.3082	3.73148e-09	potassium channel AKT2
Up-regulated	1	L. rigidum	Undisturbed	TraesCS4A02G183400.1	10.3069	2.05944e-09	transcription factor TGAL4
Up-regulated	1	L. rigidum	Undisturbed	TraesCS3B02G231400.3	10.301	6.96695e-10	calcium permeable stress-gated cation channel 1
Up-regulated	1	L. rigidum	Undisturbed	TraesCS5A02G484200.1	10.2926	1.55393e-09	Urease
Up-regulated	1	L. rigidum	Undisturbed	TraesCS7B02G432900.2	10.2739	3.19696e-06	probable plastidic glucose transporter 3
Up-regulated	1	L. rigidum	Undisturbed	TraesCS2D02G262900.1	10.2723	7.77207e-10	protein LONGIFOLIA 1
Up-regulated	1	L. rigidum	Undisturbed	TraesCS6D02G213900.2	10.2256	5.78617e-06	uncharacterized protein
Up-regulated	1	L. rigidum	Undisturbed	TraesCS2D02G451100.2	10.1726	3.28053e-06	putative ABC transporter C
Up-regulated	1	L. rigidum	Undisturbed	TraesCS3D02G124400.3	10.1666	1.658e-08	ABC transporter G family member 31
Up-regulated	1	L. rigidum	Undisturbed	TraesCS1A02G445700.1	10.1607	5.71872e-09	histone deacetylase HDAC2
Up-regulated	1	L. rigidum	Undisturbed	TraesCS4A02G121600.3	10.1486	6.83796e-10	uncharacterized protein
Up-regulated	1	L. rigidum	Undisturbed	TraesCS2A02G349200.3	10.1313	4.10292e-09	eIF-2-alpha kinase GCN2
Up-regulated	1	L. rigidum	Undisturbed	TraesCS2A02G419900.2	10.1262	9.57204e-09	argonaute 2
Up-regulated	1	L. rigidum	Undisturbed	TraesCS3A02G414100.4	10.1085	2.20185e-08	MYB-related protein
Up-regulated	1	L. rigidum	Undisturbed	TraesCS6D02G188700.2	10.0861	1.64717e-09	uncharacterized protein
Up-regulated	1	L. rigidum	Undisturbed	TraesCS3B02G273600.2	10.0786	8.02161e-09	NAC domain-containing protein 13
Up-regulated	1	L. rigidum	Undisturbed	TraesCS2A02G168600.3	10.0723	1.262e-08	uncharacterized protein
Up-regulated	1	L. rigidum	Undisturbed	TraesCS1D02G341100.3	10.0692	1.62616e-06	trehalose-phosphate synthase 1
Up-regulated	1	L. rigidum	Undisturbed	TraesCS5A02G286100.2	10.051	3.37687e-09	Purple acid phosphatase
Up-regulated	1	L. rigidum	Undisturbed	TraesCS7A02G560100.2	10.0486	5.55683e-09	glucuronoxylan 4-O-methyltransferase 1
Up-regulated	1	L. rigidum	Undisturbed	TraesCS1D02G148800.4	10.0456	2.71339e-09	WD repeat-containing protein 91 homolog
Up-regulated	1	L. rigidum	Undisturbed	TraesCS3D02G245500.2	10.0379	3.50711e-08	NAC domain-containing protein 73
Up-regulated	1	L. rigidum	Undisturbed	TraesCS7B02G217800.1	10.0317	1.04727e-08	uncharacterized protein
Up-regulated	1	L. rigidum	Undisturbed	TraesCS7A02G286900.1	10.0188	0.00120785	RNA-binding protein 25
Up-regulated	1	L. rigidum	Undisturbed	TraesCS3D02G482500.3	10.0103	4.80353e-09	crossover junction endonuclease MUS81
Up-regulated	1	L. rigidum	Undisturbed	TraesCS7A02G156000.1	10.0063	1.38603e-07	uncharacterized protein
Up-regulated	1	L. rigidum	Undisturbed	TraesCS7D02G412400.1	9.99411	1.03344e-05	Heavy metal transporting P1B-ATPase 2
Up-regulated	1	L. rigidum	Undisturbed	TraesCS1A02G264100.1	9.97497	6.46483e-09	ubinuclein-2-like
Up-regulated	1	L. rigidum	Undisturbed	TraesCS2D02G286200.5	9.96203	1.82682e-08	protein MEI2-like 4
Up-regulated	1	L. rigidum	Undisturbed	TraesCS5D02G472100.3	9.96016	5.55357e-08	protein phosphatase 2C 70
Up-regulated	1	L. rigidum	Undisturbed	TraesCS2B02G480000.2	9.95464	2.53764e-08	peroxisome biogenesis protein 6
Up-regulated	1	L. rigidum	Undisturbed	TraesCS1D02G071800.1	9.94871	7.69436e-07	Phosphoinositide phospholipase C [Source:UniProtKB/TrEMBL;Acc:A0A1D5T4M9]
Up-regulated	1	L. rigidum	Undisturbed	TraesCS3B02G342700.6	9.94032	2.23551e-08	protein MON2 homolog
Up-regulated	1	L. rigidum	Undisturbed	TraesCS4A02G216100.1	9.93465	1.17667e-08	lipase-like PAD4
Up-regulated	1	L. rigidum	Undisturbed	TraesCS5D02G044100.2	9.91938	4.11798e-06	subtilisin-like protease SBT3.9
Up-regulated	1	L. rigidum	Undisturbed	TraesCS3A02G295900.7	9.89397	2.15533e-08	ubiquitin carboxyl-terminal hydrolase 13-like
Up-regulated	1	L. rigidum	Undisturbed	TraesCS2A02G129600.3	9.88361	2.30133e-08	uncharacterized protein LOC109744178
Up-regulated	1	L. rigidum	Undisturbed	TraesCS4B02G088800.2	9.87056	1.06012e-06	Non-lysosomal glucosylceramidase [Source:UniProtKB/TrEMBL;Acc:A0A1D5XR61]
Up-regulated	1	L. rigidum	Undisturbed	TraesCS7B02G003100.1	9.84953	1.70128e-05	transcriptional corepressor LEUNIG_HOMOLOG-like
Up-regulated	1	L. rigidum	Undisturbed	TraesCS7B02G022900.2	9.84929	3.50711e-08	subtilisin-like protease SBT6.1
Up-regulated	1	L. rigidum	Undisturbed	TraesCS4A02G177800.1	9.84216	9.6052e-07	Nuclear pore complex protein Nup98-Nup96
Up-regulated	1	L. rigidum	Undisturbed	TraesCSU02G110800.4	9.83416	3.58524e-08	disease resistance protein RGA2-like
Up-regulated	1	L. rigidum	Undisturbed	TraesCS2D02G269800.6	9.8325	1.22568e-06	uncharacterized protein LOC109786668
Up-regulated	1	L. rigidum	Undisturbed	TraesCS5B02G118700.1	9.83074	7.38413e-08	dystrophia myotonica WD repeat-containing protein-like
Up-regulated	1	L. rigidum	Undisturbed	TraesCS4A02G317800.1	9.82868	3.56975e-07	protein EXPORTIN 1A
Up-regulated	1	L. rigidum	Undisturbed	TraesCS1D02G135500.3	9.82536	1.38603e-07	Phospholipid-transporting ATPase [Source:UniProtKB/TrEMBL;Acc:A0A341PHZ6]
Up-regulated	1	L. rigidum	Undisturbed	TraesCS2A02G473900.1	9.81613	4.24184e-08	unnamed protein product
Up-regulated	1	L. rigidum	Undisturbed	TraesCS5B02G504900.3	9.81541	2.57318e-07	DEAD-box ATP-dependent RNA helicase 3, chloroplastic
Up-regulated	1	L. rigidum	Undisturbed	TraesCS7A02G356100.3	9.81512	1.52423e-07	ABC transporter G family member 42
Up-regulated	1	L. rigidum	Undisturbed	TraesCS3D02G237000.3	9.81161	6.21493e-06	unnamed protein product
Up-regulated	1	L. rigidum	Undisturbed	TraesCS2A02G211700.4	9.81149	4.6525e-07	unnamed protein product
Up-regulated	1	L. rigidum	Undisturbed	TraesCS7B02G230200.2	9.80078	1.07024e-06	ENHANCER OF AG-4 protein 2
Up-regulated	1	L. rigidum	Undisturbed	TraesCS3A02G081900.1	9.79778	1.05674e-07	DNA excision repair protein CSB
Up-regulated	1	L. rigidum	Undisturbed	TraesCS6B02G139300.1	9.79408	1.35332e-07	protein ABC transporter 1, mitochondrial
Up-regulated	1	L. rigidum	Undisturbed	TraesCS4B02G274500.2	9.79235	0.00320651	uncharacterized protein LOC109758153
Up-regulated	1	L. rigidum	Undisturbed	TraesCS2D02G600000.1	9.79045	6.72158e-08	putative callose synthase 6
Up-regulated	1	L. rigidum	Undisturbed	TraesCS3B02G113500.1	9.78322	8.1523e-08	probable staphylococcal-like nuclease CAN1
Up-regulated	1	L. rigidum	Undisturbed	TraesCS3A02G143500.4	9.76835	4.01953e-07	uncharacterized protein
Up-regulated	1	L. rigidum	Undisturbed	TraesCS7B02G166900.4	9.74444	1.20954e-07	uncharacterized protein LOC109738473
Up-regulated	1	L. rigidum	Undisturbed	TraesCS6D02G085300.4	9.73685	9.26833e-08	phosphatidylinositol/phosphatidylcholine transfer protein SFH6-like
Up-regulated	1	L. rigidum	Undisturbed	TraesCS5D02G123300.5	9.73418	8.97213e-07	ubiquitin carboxyl-terminal hydrolase 12-like
Up-regulated	1	L. rigidum	Undisturbed	TraesCS7A02G398600.2	9.73115	9.18154e-08	cell division cycle protein 27 homolog B
Up-regulated	1	L. rigidum	Undisturbed	TraesCS5A02G234300.1	9.72236	1.20818e-07	1-aminocyclopropane-1-carboxylate oxidase 1-like
Up-regulated	1	L. rigidum	Undisturbed	TraesCS6D02G261100.1	9.72122	9.2134e-05	Clustered mitochondria protein homolog [Source:UniProtKB/TrEMBL;Acc:A0A341XFB8]
Up-regulated	1	L. rigidum	Undisturbed	TraesCS1B02G283500.1	9.71573	5.70949e-06	uncharacterized protein LOC109753146
Up-regulated	1	L. rigidum	Undisturbed	TraesCS6D02G132500.2	9.69193	1.06156e-06	porphobilinogen deaminase, chloroplastic
Up-regulated	1	L. rigidum	Undisturbed	TraesCS4D02G201900.4	9.686	2.89284e-07	uncharacterized protein
Up-regulated	1	L. rigidum	Undisturbed	TraesCS3A02G433400.1	9.66531	3.64925e-07	CBS domain-containing protein CBSCBSPB1-like
Up-regulated	1	L. rigidum	Undisturbed	TraesCS1A02G439500.1	9.66093	7.59709e-07	chromatin modification-related protein EAF1 B-like
Up-regulated	1	L. rigidum	Undisturbed	TraesCS1B02G384500.2	9.65104	1.91554e-07	phosphatidylinositol/phosphatidylcholine transfer protein SFH8-like
Up-regulated	1	L. rigidum	Undisturbed	TraesCS3D02G530000.2	9.64709	1.50611e-06	probable histone acetyltransferase HAC-like 3
Up-regulated	1	L. rigidum	Undisturbed	TraesCS2B02G583300.3	9.63993	8.02835e-07	Vacuolar protein sorting-associated protein 41 homolog [Source:UniProtKB/TrEMBL;Acc:A0A1D6D8R1]
Up-regulated	1	L. rigidum	Undisturbed	TraesCS3B02G277500.6	9.63583	1.30642e-06	myosin-17-like
Up-regulated	1	L. rigidum	Undisturbed	TraesCS6D02G227300.3	9.6347	2.57318e-07	mitogen-activated protein kinase kinase kinase YODA-like
Up-regulated	1	L. rigidum	Undisturbed	TraesCS5A02G556400.1	9.61284	3.24694e-05	STE20/SPS1-related proline-alanine-rich protein kinase-like
Up-regulated	1	L. rigidum	Undisturbed	TraesCS5B02G221500.1	9.60108	1.32505e-06	Cellulose synthase A catalytic subunit 7 [UDP-forming];
Up-regulated	1	L. rigidum	Undisturbed	TraesCS6B02G274100.2	9.59922	2.88525e-07	E3 ubiquitin protein ligase [Source:UniProtKB/TrEMBL;Acc:A0A1D6AT36]
Up-regulated	1	L. rigidum	Undisturbed	TraesCS3D02G411200.6	9.59698	3.2833e-07	endoribonuclease Dicer homolog 3a
Up-regulated	1	L. rigidum	Undisturbed	TraesCS3A02G133700.1	9.59157	1.08452e-06	polyadenylate-binding protein-interacting protein 11-like
Up-regulated	1	L. rigidum	Undisturbed	TraesCS4D02G057800.2	9.58763	3.781e-07	putative lipase C4A8.10
Up-regulated	1	L. rigidum	Undisturbed	TraesCS6B02G217500.2	9.58227	2.68408e-05	heterogeneous nuclear ribonucleoproteins A2/B1-like
Up-regulated	1	L. rigidum	Undisturbed	TraesCS5B02G004400.1	9.57832	0.00240265	protein ALWAYS EARLY 2-like
Up-regulated	1	L. rigidum	Undisturbed	TraesCS7A02G343900.3	9.57724	0.000576216	BTB/POZ domain-containing protein POB1-like
Up-regulated	1	L. rigidum	Undisturbed	TraesCS2B02G526200.3	9.5695	1.05339e-05	MAP3K epsilon protein kinase 1-like
Up-regulated	1	L. rigidum	Undisturbed	TraesCS2A02G283800.2	9.56198	1.09795e-06	Calmodulin-binding transcription activator 1
Up-regulated	1	L. rigidum	Undisturbed	TraesCS4B02G180100.2	9.55287	2.05402e-06	protein REDUCED WALL ACETYLATION 1-like
Up-regulated	1	L. rigidum	Undisturbed	TraesCS3A02G175700.1	9.54223	4.73172e-07	zinc finger CCCH domain-containing protein 4
Up-regulated	1	L. rigidum	Undisturbed	TraesCS5D02G548600.1	9.53327	5.34991e-07	putative disease resistance RPP13-like protein 3
Up-regulated	1	L. rigidum	Undisturbed	TraesCS1D02G069700.1	9.53161	0.00268988	uncharacterized protein LOC109734119
Up-regulated	1	L. rigidum	Undisturbed	TraesCS2B02G441100.1	9.51231	4.63434e-05	Potassium transporter [Source:UniProtKB/TrEMBL;Acc:A0A341QTE0]
Up-regulated	1	L. rigidum	Undisturbed	TraesCS4D02G143800.2	9.50526	1.94487e-06	Ribonucleases P/MRP protein subunit POP1
Up-regulated	1	L. rigidum	Undisturbed	TraesCS1D02G098500.1	9.49903	0.00648698	cullin-1
Up-regulated	1	L. rigidum	Undisturbed	TraesCS2D02G401600.2	9.48332	0.00300421	Niemann-Pick C1 protein-like
Up-regulated	1	L. rigidum	Undisturbed	TraesCS1B02G374100.4	9.4767	0.00100736	protein IQ-DOMAIN 31-like
Up-regulated	1	L. rigidum	Undisturbed	TraesCS2A02G403100.5	9.46192	3.79292e-05	protein argonaute 1B
Up-regulated	1	L. rigidum	Undisturbed	TraesCS6A02G239100.1	9.45495	4.32611e-05	Kinesin-like protein [Source:UniProtKB/TrEMBL;Acc:A0A341WZW1]
Up-regulated	1	L. rigidum	Undisturbed	TraesCS7B02G271700.2	9.45258	3.31161e-05	kinesin-like protein KIN-14M
Up-regulated	1	L. rigidum	Undisturbed	TraesCS2D02G355700.4	9.44925	0.000138239	trafficking protein particle complex II-specific subunit 120
Up-regulated	1	L. rigidum	Undisturbed	TraesCS5A02G024900.3	9.44834	9.98654e-06	5-methyltetrahydropteroyltriglutamate--homocysteine methyltransferase 1-like
Up-regulated	1	L. rigidum	Undisturbed	TraesCS5A02G113100.3	9.44593	1.54742e-06	probable L-ascorbate peroxidase 6, chloroplastic
Up-regulated	1	L. rigidum	Undisturbed	TraesCS7B02G184300.5	9.4413	4.29189e-06	unnamed protein product
Up-regulated	1	L. rigidum	Undisturbed	TraesCS3B02G236700.7	9.42912	1.22568e-06	DENN domain and WD repeat-containing protein SCD1
Up-regulated	1	L. rigidum	Undisturbed	TraesCS5B02G182900.3	9.41017	1.30821e-06	putative disease resistance protein RGA3
Up-regulated	1	L. rigidum	Undisturbed	TraesCS2B02G144300.4	9.40503	1.73383e-05	unnamed protein product
Up-regulated	1	L. rigidum	Undisturbed	TraesCS4A02G013700.1	9.40412	1.33906e-06	uncharacterized protein LOC109764713
Up-regulated	1	L. rigidum	Undisturbed	TraesCS7A02G316900.2	9.40139	5.25315e-06	polyadenylate-binding protein-interacting protein 11-like
Up-regulated	1	L. rigidum	Undisturbed	TraesCS7A02G549100.4	9.39456	1.9709e-06	starch branching enzyme I
Up-regulated	1	L. rigidum	Undisturbed	TraesCS7D02G238000.1	9.38571	1.93519e-06	phosphatidylinositol/phosphatidylcholine transfer protein SFH8-like
Up-regulated	1	L. rigidum	Undisturbed	TraesCS1B02G158300.3	9.38461	1.52547e-06	protein GDAP2 homolog
Up-regulated	1	L. rigidum	Undisturbed	TraesCS1B02G354200.2	9.38198	2.39192e-06	kinesin-like protein KIN-14K
Up-regulated	1	L. rigidum	Undisturbed	TraesCS7A02G015000.1	9.37337	5.23038e-05	Protein transport protein sec16 [Source:UniProtKB/TrEMBL;Acc:A0A341XL42]
Up-regulated	1	L. rigidum	Undisturbed	TraesCS2B02G246900.9	9.37082	1.69396e-05	TORTIFOLIA1-like protein 1
Up-regulated	1	L. rigidum	Undisturbed	TraesCS2D02G062900.2	9.35849	2.97794e-06	uncharacterized protein LOC109751853
Up-regulated	1	L. rigidum	Undisturbed	TraesCS3B02G322600.3	9.35256	2.05783e-06	unnamed protein product;
Up-regulated	1	L. rigidum	Undisturbed	TraesCS3D02G010900.1	9.34626	2.0669e-06	germin-like protein 8-11
Up-regulated	1	L. rigidum	Undisturbed	TraesCS2A02G113900.3	9.34593	4.60473e-05	uncharacterized protein
Up-regulated	1	L. rigidum	Undisturbed	TraesCS7B02G183200.2	9.34118	2.03205e-06	protein SMAX1-like
Up-regulated	1	L. rigidum	Undisturbed	TraesCS2D02G211200.4	9.33756	3.09094e-06	myosin-3-like
Up-regulated	1	L. rigidum	Undisturbed	TraesCS5D02G503400.2	9.3362	2.33009e-06	GEM-like protein 5
Up-regulated	1	L. rigidum	Undisturbed	TraesCS4B02G161000.1	9.33075	5.23112e-06	CRM-domain containing factor CFM3, chloroplastic/mitochondrial
Up-regulated	1	L. rigidum	Undisturbed	TraesCS7A02G328800.1	9.32833	2.72709e-06	flap endonuclease GEN-like 2
Up-regulated	1	L. rigidum	Undisturbed	TraesCS7D02G185700.1	9.31965	2.63221e-06	ABC transporter G family member 48-like
Up-regulated	1	L. rigidum	Undisturbed	TraesCS6B02G314300.1	9.317	2.39192e-06	ADP-ribosylation factor GTPase-activating protein AGD12-like
Up-regulated	1	L. rigidum	Undisturbed	TraesCS1A02G338900.1	9.29786	7.41233e-05	homeobox protein HOX1A-like
Up-regulated	1	L. rigidum	Undisturbed	TraesCS7B02G431100.5	9.2973	3.0246e-05	methyl-CpG-binding domain-containing protein 13-like
Up-regulated	1	L. rigidum	Undisturbed	TraesCS6A02G384000.2	9.29626	2.72709e-06	F-box protein PP2-B10-like
Up-regulated	1	L. rigidum	Undisturbed	TraesCS6D02G344900.1	9.28824	0.0016677	probable E3 ubiquitin-protein ligase HIP1
Up-regulated	1	L. rigidum	Undisturbed	TraesCS3A02G100900.1	9.28357	2.64651e-05	Glycosyltransferase [Source:UniProtKB/TrEMBL;Acc:A0A1D6RQX5]
Up-regulated	1	L. rigidum	Undisturbed	TraesCS2A02G317000.2	9.28327	2.95947e-06	Zeaxanthin epoxidase, chloroplastic [Source:UniProtKB/TrEMBL;Acc:W5ASU4]
Up-regulated	1	L. rigidum	Undisturbed	TraesCS1B02G327300.1	9.27821	4.81192e-06	putative E3 ubiquitin-protein ligase RING1a
Up-regulated	1	L. rigidum	Undisturbed	TraesCS1A02G403900.2	9.26425	0.019142	unnamed protein product
Up-regulated	1	L. rigidum	Undisturbed	TraesCS4B02G180200.2	9.26011	0.00901726	probable pre-mRNA-splicing factor ATP-dependent RNA helicase
Up-regulated	1	L. rigidum	Undisturbed	TraesCS3D02G116400.1	9.24712	5.16191e-06	probable galactinol--sucrose galactosyltransferase 2
Up-regulated	1	L. rigidum	Undisturbed	TraesCS4A02G376900.1	9.24608	3.57068e-06	nitrate regulatory gene2 protein
Up-regulated	1	L. rigidum	Undisturbed	TraesCS4A02G169300.7	9.23376	0.000520463	unnamed protein product
Up-regulated	1	L. rigidum	Undisturbed	TraesCS6A02G248500.2	9.23146	3.76202e-05	Peroxisome biogenesis protein 19-1
Up-regulated	1	L. rigidum	Undisturbed	TraesCS5B02G570200.1	9.22873	4.98183e-05	4-hydroxyphenylacetaldehyde oxime monooxygenase-like
Up-regulated	1	L. rigidum	Undisturbed	TraesCS2A02G327000.5	9.22725	5.92996e-06	protein NBR1 homolog
Up-regulated	1	L. rigidum	Undisturbed	TraesCS5B02G278900.3	9.22722	0.00203765	unnamed protein product
Up-regulated	1	L. rigidum	Undisturbed	TraesCS2A02G514100.2	9.22322	9.20017e-05	filament-like plant protein 7
Up-regulated	1	L. rigidum	Undisturbed	TraesCS2B02G284400.3	9.21907	0.000144035	unnamed protein product
Up-regulated	1	L. rigidum	Undisturbed	TraesCS6D02G378300.2	9.20661	0.000229234	Auxin-responsive protein [Source:UniProtKB/TrEMBL;Acc:A0A1D6BAS5]
Up-regulated	1	L. rigidum	Undisturbed	TraesCS7A02G302000.3	9.20462	3.0246e-05	oxysterol-binding protein-related protein 2A-like
Up-regulated	1	L. rigidum	Undisturbed	TraesCS2B02G132900.3	9.19133	7.45722e-06	uncharacterized protein
Up-regulated	1	L. rigidum	Undisturbed	TraesCS2A02G238600.1	9.18861	0.000101478	casein kinase 1-like protein HD16
Up-regulated	1	L. rigidum	Undisturbed	TraesCS6D02G180700.2	9.18547	0.00101469	apoptosis inhibitor 5-like protein API5
Up-regulated	1	L. rigidum	Undisturbed	TraesCS1A02G236100.4	9.1844	1.22054e-05	protein BONZAI 3-like
Up-regulated	1	L. rigidum	Undisturbed	TraesCS4B02G001300.2	9.17943	4.37112e-05	peptidyl-prolyl cis-trans isomerase-like
Up-regulated	1	L. rigidum	Undisturbed	TraesCS3A02G248800.6	9.17881	4.71223e-05	myosin-17-like
Up-regulated	1	L. rigidum	Undisturbed	TraesCS3B02G326500.3	9.17289	5.44874e-06	transcription factor VOZ1-like
Up-regulated	1	L. rigidum	Undisturbed	TraesCS2A02G211200.4	9.16954	1.89415e-05	Serine/threonine-protein kinase [Source:UniProtKB/TrEMBL;Acc:A0A1D5TR70]
Up-regulated	1	L. rigidum	Undisturbed	TraesCS7D02G178800.1	9.16813	1.69826e-05	O-fucosyltransferase 7
Up-regulated	1	L. rigidum	Undisturbed	TraesCS2B02G427700.1	9.16606	3.00383e-05	acyl-CoA thioesterase protein splice-form 1
Up-regulated	1	L. rigidum	Undisturbed	TraesCS2D02G426000.3	9.16389	1.22054e-05	uncharacterized protein LOC109759269
Up-regulated	1	L. rigidum	Undisturbed	TraesCS4A02G126800.4	9.16319	1.74044e-05	Non-specific serine/threonine protein kinase
Up-regulated	1	L. rigidum	Undisturbed	TraesCS4D02G242000.2	9.15118	6.64858e-06	uncharacterized protein
Up-regulated	1	L. rigidum	Undisturbed	TraesCS5D02G382500.1	9.14948	4.2615e-05	protein IQ-DOMAIN 1-like
Up-regulated	1	L. rigidum	Undisturbed	TraesCS3A02G298400.4	9.14443	9.98654e-06	unnamed protein product
Up-regulated	1	L. rigidum	Undisturbed	TraesCS3A02G323000.1	9.12847	0.00573808	protein MON2 homolog
Up-regulated	1	L. rigidum	Undisturbed	TraesCS5B02G105200.2	9.12805	6.64858e-06	unnamed protein product
Up-regulated	1	L. rigidum	Undisturbed	TraesCS2A02G002500.2	9.12498	0.000467782	polycomb group protein EMBRYONIC FLOWER 2-like
Up-regulated	1	L. rigidum	Undisturbed	TraesCS5B02G391500.1	9.12212	7.32846e-06	YTH domain-containing family protein 3-like
Up-regulated	1	L. rigidum	Undisturbed	TraesCS3A02G009400.2	9.11074	9.52384e-06	protein PAF1 homolog
Up-regulated	1	L. rigidum	Undisturbed	TraesCS3D02G528200.2	9.10793	2.26968e-05	villin-3
Up-regulated	1	L. rigidum	Undisturbed	TraesCS2D02G117800.1	9.1074	0.00284031	DNA polymerase zeta catalytic subunit
Up-regulated	1	L. rigidum	Undisturbed	TraesCS2D02G248700.2	9.10498	2.91446e-05	indole-3-acetaldehyde oxidase-like
Up-regulated	1	L. rigidum	Undisturbed	TraesCS3D02G348300.1	9.10196	1.73944e-05	SAC3 family protein A-like
Up-regulated	1	L. rigidum	Undisturbed	TraesCS4B02G209500.4	9.10018	7.47507e-06	predicted protein
Up-regulated	1	L. rigidum	Undisturbed	TraesCS4A02G457600.2	9.09998	7.51702e-06	membrane protein of ER body-like protein
Up-regulated	1	L. rigidum	Undisturbed	TraesCS6D02G189700.1	9.0899	1.16063e-05	probable serine/threonine-protein kinase DDB_G0276461
Up-regulated	1	L. rigidum	Undisturbed	TraesCS2A02G238600.3	9.08805	7.65544e-06	casein kinase 1-like protein HD16
Up-regulated	1	L. rigidum	Undisturbed	TraesCS7A02G380900.1	9.08343	8.95079e-06	ABC transporter B family member 28
Up-regulated	1	L. rigidum	Undisturbed	TraesCS5B02G092900.3	9.08067	8.29399e-06	5-methylthioadenosine/S-adenosylhomocysteine deaminase-like
Up-regulated	1	L. rigidum	Undisturbed	TraesCS5D02G007000.1	9.07424	0.0060129	protein ALWAYS EARLY 2-like
Up-regulated	1	L. rigidum	Undisturbed	TraesCS6B02G110100.2	9.07253	6.52049e-05	Transcription factor HBP-1a [Source:UniProtKB/Swiss-Prot;Acc:P23922]
Up-regulated	1	L. rigidum	Undisturbed	TraesCS1B02G159600.4	9.06876	1.43322e-05	unnamed protein product
Up-regulated	1	L. rigidum	Undisturbed	TraesCS2B02G424500.1	9.05423	0.000212897	prolyl endopeptidase-like
Up-regulated	1	L. rigidum	Undisturbed	TraesCS1A02G142200.2	9.03283	0.00164891	unnamed protein product
Up-regulated	1	L. rigidum	Undisturbed	TraesCS3A02G042600.2	9.03261	1.70128e-05	metal tolerance protein 7-like
Up-regulated	1	L. rigidum	Undisturbed	TraesCS1B02G187100.3	9.03127	1.05806e-05	mediator of RNA polymerase II transcription subunit 16
Up-regulated	1	L. rigidum	Undisturbed	TraesCS2D02G236200.3	9.01545	1.36028e-05	DNA-binding protein EMBP-1-like
Up-regulated	1	L. rigidum	Undisturbed	TraesCS1D02G045100.2	9.0154	0.000911613	uncharacterized protein LOC109741174
Up-regulated	1	L. rigidum	Undisturbed	TraesCS6B02G304100.1	9.01434	1.43322e-05	ATP-dependent DNA helicase homolog RECG, chloroplastic
Up-regulated	1	L. rigidum	Undisturbed	TraesCS7B02G309100.4	9.01045	0.000205857	Poly [ADP-ribose] polymerase [Source:UniProtKB/TrEMBL;Acc:A0A341YGX4]
Up-regulated	1	L. rigidum	Undisturbed	TraesCS3B02G306400.1	8.97899	1.42192e-05	ABC transporter G family member 32-like
Up-regulated	1	L. rigidum	Undisturbed	TraesCS5A02G434400.2	8.97126	7.98551e-05	5'-3' exoribonuclease
Up-regulated	1	L. rigidum	Undisturbed	TraesCS5B02G414000.3	8.96855	9.96934e-05	protein NRT1/ PTR FAMILY 6.4
Up-regulated	1	L. rigidum	Undisturbed	TraesCS2A02G131400.4	8.96737	1.43969e-05	rho GTPase-activating protein 7-like
Up-regulated	1	L. rigidum	Undisturbed	TraesCS5B02G525600.2	8.96553	1.87257e-05	Phospholipase D [Source:UniProtKB/TrEMBL;Acc:A0A1D5ZAX8]
Up-regulated	1	L. rigidum	Undisturbed	TraesCS6D02G209000.3	8.96214	0.0158151	E3 ubiquitin-protein ligase PRT1
Up-regulated	1	L. rigidum	Undisturbed	TraesCS3A02G118700.1	8.962	0.000145425	unnamed protein product
Up-regulated	1	L. rigidum	Undisturbed	TraesCS3D02G504300.3	8.95723	0.000744107	THO complex subunit 2-like
Up-regulated	1	L. rigidum	Undisturbed	TraesCS4B02G137900.3	8.94969	2.14003e-05	protein CHUP1, chloroplastic-like
Up-regulated	1	L. rigidum	Undisturbed	TraesCS3D02G365200.3	8.94622	1.6554e-05	transcription factor LG2-like
Up-regulated	1	L. rigidum	Undisturbed	TraesCS4B02G135800.2	8.9432	0.000487812	protein DWARF 53
Up-regulated	1	L. rigidum	Undisturbed	TraesCS3D02G411900.2	8.94163	7.98551e-05	glycine-rich cell wall structural protein 1.8-like
Up-regulated	1	L. rigidum	Undisturbed	TraesCS5B02G508600.1	8.93432	1.63815e-05	pumilio homolog 24-like
Up-regulated	1	L. rigidum	Undisturbed	TraesCS7D02G449700.2	8.92549	5.13931e-05	solanesyl-diphosphate synthase 1
Up-regulated	1	L. rigidum	Undisturbed	TraesCS6A02G199900.5	8.9222	0.000728756	calmodulin-binding protein 60 B-like
Up-regulated	1	L. rigidum	Undisturbed	TraesCS5A02G266600.2	8.92141	3.5147e-05	MYB-related protein
Up-regulated	1	L. rigidum	Undisturbed	TraesCS5B02G375000.2	8.91576	0.00331719	protein IQ-DOMAIN 1-like
Up-regulated	1	L. rigidum	Undisturbed	TraesCS3A02G091100.2	8.91573	1.8989e-05	protein NSP-INTERACTING KINASE 3
Up-regulated	1	L. rigidum	Undisturbed	TraesCS4A02G063700.3	8.91408	1.85226e-05	protein VAC14 homolog
Up-regulated	1	L. rigidum	Undisturbed	TraesCS1D02G112300.1	8.90798	0.000106451	6-phosphofructo-2-kinase/fructose-2,6-bisphosphatase-like
Up-regulated	1	L. rigidum	Undisturbed	TraesCS7D02G035300.1	8.90115	0.000200856	disease resistance protein RPM1-like
Up-regulated	1	L. rigidum	Undisturbed	TraesCS6D02G314500.4	8.89763	4.4955e-05	Kinesin-like protein [Source:UniProtKB/TrEMBL;Acc:A0A341XH86]
Up-regulated	1	L. rigidum	Undisturbed	TraesCS2A02G364700.2	8.89526	0.00967525	endoribonuclease Dicer homolog 4
Up-regulated	1	L. rigidum	Undisturbed	TraesCS4A02G171500.3	8.89522	2.22617e-05	RGS domain-containing serine/threonine-protein kinase A-like
Up-regulated	1	L. rigidum	Undisturbed	TraesCS2B02G505400.2	8.89003	4.35298e-25	Kinesin-like protein [Source:UniProtKB/TrEMBL;Acc:A0A1D5TXR2]
Up-regulated	1	L. rigidum	Undisturbed	TraesCS5B02G461900.2	8.88981	0.000960303	BTB/POZ domain-containing protein At1g03010-like
Up-regulated	1	L. rigidum	Undisturbed	TraesCS4A02G445000.4	8.88147	2.22617e-05	GDSL esterase/lipase At5g62930
Up-regulated	1	L. rigidum	Undisturbed	TraesCS7B02G359400.1	8.87469	2.15765e-05	Mediator of RNA polymerase II transcription subunit 17 [Source:UniProtKB/TrEMBL;Acc:A0A341YVQ7]
Up-regulated	1	L. rigidum	Undisturbed	TraesCS2B02G453400.5	8.86879	0.000157509	unnamed protein product
Up-regulated	1	L. rigidum	Undisturbed	TraesCS2A02G327300.1	8.86812	4.17565e-05	C2 and GRAM domain-containing protein At5g50170-like
Up-regulated	1	L. rigidum	Undisturbed	TraesCS1A02G114300.1	8.86529	0.000119489	unnamed protein product
Up-regulated	1	L. rigidum	Undisturbed	TraesCS3D02G144300.1	8.86366	4.6559e-05	Histone-lysine N-methyltransferase [Source:UniProtKB/TrEMBL;Acc:A0A1D5WTK5]
Up-regulated	1	L. rigidum	Undisturbed	TraesCS3B02G131700.1	8.85847	0.00150844	homeobox-DDT domain protein RLT3-like
Up-regulated	1	L. rigidum	Undisturbed	TraesCS3A02G251000.1	8.85747	0.00194946	receptor-like serine/threonine-protein kinase ALE2
Up-regulated	1	L. rigidum	Undisturbed	TraesCS7D02G250100.4	8.85732	2.54065e-05	Auxin response factor [Source:UniProtKB/TrEMBL;Acc:A0A1D6D327]
Up-regulated	1	L. rigidum	Undisturbed	TraesCS2A02G428000.1	8.85387	2.96188e-05	uncharacterized protein LOC109759269
Up-regulated	1	L. rigidum	Undisturbed	TraesCS2B02G094100.1	8.85014	2.46939e-05	U-box domain-containing protein 33-like
Up-regulated	1	L. rigidum	Undisturbed	TraesCS2D02G458300.2	8.8445	0.00378047	peroxisome biogenesis protein 6
Up-regulated	1	L. rigidum	Undisturbed	TraesCS1A02G094700.2	8.84344	5.23038e-05	uncharacterized protein LOC109761708
Up-regulated	1	L. rigidum	Undisturbed	TraesCS3B02G581900.1	8.8424	5.81023e-05	unnamed protein product
Up-regulated	1	L. rigidum	Undisturbed	TraesCS5A02G144600.2	8.84088	3.00772e-05	probable serine/threonine-protein kinase PBL8
Up-regulated	1	L. rigidum	Undisturbed	TraesCS5A02G134200.3	8.83421	2.85252e-05	protein trichome birefringence-like 11
Up-regulated	1	L. rigidum	Undisturbed	TraesCS1A02G093900.3	8.83284	0.000312328	translocase of chloroplast 159, chloroplastic
Up-regulated	1	L. rigidum	Undisturbed	TraesCS5D02G124300.2	8.82828	0.00269904	nuclear pore complex protein NUP1-like
Up-regulated	1	L. rigidum	Undisturbed	TraesCS6B02G231200.2	8.82634	4.73947e-05	probable serine/threonine-protein kinase At1g54610
Up-regulated	1	L. rigidum	Undisturbed	TraesCS1A02G160700.3	8.82082	7.06622e-05	protein EXECUTER 1, chloroplastic
Up-regulated	1	L. rigidum	Undisturbed	TraesCS5A02G193300.1	8.80654	3.48708e-05	probable serine/threonine-protein kinase
Up-regulated	1	L. rigidum	Undisturbed	TraesCS2B02G355000.2	8.8027	5.23038e-05	protein NBR1 homolog
Up-regulated	1	L. rigidum	Undisturbed	TraesCS5A02G159200.2	8.79709	7.8562e-05	RNA pseudourine synthase 4, mitochondrial
Up-regulated	1	L. rigidum	Undisturbed	TraesCS3D02G543400.5	8.79405	2.98587e-05	E3 SUMO-protein ligase SIZ1
Up-regulated	1	L. rigidum	Undisturbed	TraesCS5D02G396300.2	8.79277	8.33862e-05	myosin-12
Up-regulated	1	L. rigidum	Undisturbed	TraesCS1D02G071800.3	8.79043	0.00708866	Phosphoinositide phospholipase C [Source:UniProtKB/TrEMBL;Acc:A0A1D5T4M9]
Up-regulated	1	L. rigidum	Undisturbed	TraesCS4B02G182100.1	8.78166	8.33862e-05	protein high chlorophyll fluorescent 107
Up-regulated	1	L. rigidum	Undisturbed	TraesCS1D02G276100.4	8.77416	0.0012734	transcription factor TGAL5-like
Up-regulated	1	L. rigidum	Undisturbed	TraesCS5B02G557300.1	8.76303	0.000150903	beta-fructofuranosidase, insoluble isoenzyme 4-like
Up-regulated	1	L. rigidum	Undisturbed	TraesCS2B02G272600.3	8.76115	0.000178207	WPP domain-associated protein-like
Up-regulated	1	L. rigidum	Undisturbed	TraesCS2A02G405000.1	8.7555	0.000288878	unnamed protein product
Up-regulated	1	L. rigidum	Undisturbed	TraesCS7A02G283500.2	8.75122	3.80779e-05	mediator of RNA polymerase II transcription subunit 15a
Up-regulated	1	L. rigidum	Undisturbed	TraesCS1B02G191100.2	8.74791	0.000207561	membrane steroid-binding protein 1-like
Up-regulated	1	L. rigidum	Undisturbed	TraesCS7A02G235200.4	8.74656	8.59627e-05	alpha-glucan water dikinase, chloroplastic
Up-regulated	1	L. rigidum	Undisturbed	TraesCS3A02G326700.3	8.73836	0.000474542	unnamed protein product
Up-regulated	1	L. rigidum	Undisturbed	TraesCSU02G200400.1	8.73754	3.68427e-05	hypothetical protein TRIUR3_22357
Up-regulated	1	L. rigidum	Undisturbed	TraesCS2D02G282800.6	8.73747	0.00828222	calmodulin-binding transcription activator 4
Up-regulated	1	L. rigidum	Undisturbed	TraesCS7A02G205200.2	8.73381	3.79292e-05	fructose-1,6-bisphosphate aldolase 19
Up-regulated	1	L. rigidum	Undisturbed	TraesCS3B02G323600.4	8.73158	4.38223e-05	RING finger and CHY zinc finger domain-containing protein 1
Up-regulated	1	L. rigidum	Undisturbed	TraesCS2D02G176200.3	8.7304	0.00305496	uncharacterized protein LOC109746707
Up-regulated	1	L. rigidum	Undisturbed	TraesCS5D02G299600.1	8.72409	3.80779e-05	uncharacterized protein At4g22758
Up-regulated	1	L. rigidum	Undisturbed	TraesCS3B02G005900.1	8.71235	0.00980001	paired amphipathic helix protein Sin3-like 3
Up-regulated	1	L. rigidum	Undisturbed	TraesCS3B02G141700.3	8.71112	0.00207968	ABC transporter G family member 31
Up-regulated	1	L. rigidum	Undisturbed	TraesCS7B02G001600.1	8.70517	6.627e-05	rhodanese-like domain-containing protein 8, chloroplastic
Up-regulated	1	L. rigidum	Undisturbed	TraesCS2D02G455600.2	8.70411	7.65183e-05	Glutamate receptor [Source:UniProtKB/TrEMBL;Acc:A0A1D5URP8]
Up-regulated	1	L. rigidum	Undisturbed	TraesCS3A02G199400.12	8.7015	0.000197763	protein HASTY 1
Up-regulated	1	L. rigidum	Undisturbed	TraesCS6B02G260800.1	8.70003	0.000133336	nitrilase
Up-regulated	1	L. rigidum	Undisturbed	TraesCS7B02G150200.1	8.69805	0.000950192	oxysterol-binding protein-related protein 4C-like
Up-regulated	1	L. rigidum	Undisturbed	TraesCS4D02G218100.1	8.69167	0.000465034	myosin-binding protein 2
Up-regulated	1	L. rigidum	Undisturbed	TraesCS4B02G127400.2	8.69067	4.72173e-05	RGS domain-containing serine/threonine-protein kinase A-like
Up-regulated	1	L. rigidum	Undisturbed	TraesCS4B02G178100.1	8.68368	0.000971451	Non-specific serine/threonine protein kinase [Source:UniProtKB/TrEMBL;Acc:A0A0D3R0R3]
Up-regulated	1	L. rigidum	Undisturbed	TraesCS5D02G175700.1	8.68065	5.12047e-05	GPI inositol-deacylase [Source:UniProtKB/TrEMBL;Acc:A0A1D6S4N3]
Up-regulated	1	L. rigidum	Undisturbed	TraesCS5A02G509800.1	8.67736	0.00538403	uncharacterized protein LOC109734418
Up-regulated	1	L. rigidum	Undisturbed	TraesCS4D02G216900.2	8.67677	4.66705e-05	uncharacterized protein LOC109775148
Up-regulated	1	L. rigidum	Undisturbed	TraesCS2B02G323700.2	8.67164	0.000119489	mitogen-activated protein kinase kinase kinase 3-like
Up-regulated	1	L. rigidum	Undisturbed	TraesCS7B02G047100.4	8.66548	7.98551e-05	probable transcriptional regulator SLK3
Up-regulated	1	L. rigidum	Undisturbed	TraesCS6B02G431500.3	8.66237	7.41233e-05	unnamed protein product
Up-regulated	1	L. rigidum	Undisturbed	TraesCS1D02G286500.8	8.6553	7.34359e-05	SAC3 family protein A
Up-regulated	1	L. rigidum	Undisturbed	TraesCS7A02G096700.2	8.6536	0.000522683	Iron-sulfur assembly protein IscA, chloroplastic
Up-regulated	1	L. rigidum	Undisturbed	TraesCS2B02G270100.3	8.65156	0.000629575	probable inactive leucine-rich repeat receptor-like protein kinase At3g03770
Up-regulated	1	L. rigidum	Undisturbed	TraesCS3D02G038000.1	8.64421	6.61652e-05	metal tolerance protein 7-like
Up-regulated	1	L. rigidum	Undisturbed	TraesCS3A02G372400.1	8.63777	0.00201942	transcription factor LG2-like
Up-regulated	1	L. rigidum	Undisturbed	TraesCS4D02G175000.3	8.6352	0.000298289	protein PHOSPHATE STARVATION RESPONSE 1-like
Up-regulated	1	L. rigidum	Undisturbed	TraesCS7B02G079700.2	8.63109	0.000434207	kinesin-like protein KIN-14L
Up-regulated	1	L. rigidum	Undisturbed	TraesCS7D02G412400.3	8.63071	7.53681e-05	Heavy metal transporting P1B-ATPase 2 [Source:UniProtKB/TrEMBL;Acc:A0A060A6M6]
Up-regulated	1	L. rigidum	Undisturbed	TraesCS7A02G295800.1	8.63071	7.53681e-05	Structural maintenance of chromosomes protein [Source:UniProtKB/TrEMBL;Acc:A0A341Y7B0]
Up-regulated	1	L. rigidum	Undisturbed	TraesCS4B02G155900.2	8.62345	9.1621e-05	unnamed protein product
Up-regulated	1	L. rigidum	Undisturbed	TraesCS5B02G200600.2	8.62228	6.33987e-05	Phospholipase D [Source:UniProtKB/TrEMBL;Acc:A0A341VUR5]
Up-regulated	1	L. rigidum	Undisturbed	TraesCS3A02G105800.1	8.61487	0.00104546	Protein ALWAYS EARLY 2
Up-regulated	1	L. rigidum	Undisturbed	TraesCS3B02G091100.1	8.61444	0.000213613	unnamed protein product
Up-regulated	1	L. rigidum	Undisturbed	TraesCS5D02G326500.1	8.61294	0.00277991	uncharacterized protein LOC109770311
Up-regulated	1	L. rigidum	Undisturbed	TraesCS5B02G473500.2	8.61277	0.000288878	NB-LRR protein
Up-regulated	1	L. rigidum	Undisturbed	TraesCS5D02G510200.2	8.61069	0.000246662	uncharacterized protein LOC109752988
Up-regulated	1	L. rigidum	Undisturbed	TraesCS3A02G361700.7	8.60862	0.000212874	pumilio homolog 1-like
Up-regulated	1	L. rigidum	Undisturbed	TraesCS2A02G041100.2	8.59718	0.00961693	dihydrolipoyllysine-residue succinyltransferase component of 2-oxoglutarate dehydrogenase complex 1, mitochondrial-like
Up-regulated	1	L. rigidum	Undisturbed	TraesCS3A02G296100.2	8.59321	0.00415809	unnamed protein product
Up-regulated	1	L. rigidum	Undisturbed	TraesCS3D02G178700.4	8.58496	0.000293827	nuclear pore complex protein NUP98A-like
Up-regulated	1	L. rigidum	Undisturbed	TraesCS2D02G239300.1	8.58367	0.00909208	ranBP2-type zinc finger protein At1g67325-like
Up-regulated	1	L. rigidum	Undisturbed	TraesCS4A02G056200.3	8.57636	0.000205448	putative mitochondrial-processing peptidase subunit beta
Up-regulated	1	L. rigidum	Undisturbed	TraesCS6D02G032100.2	8.57477	0.000156398	pre-mRNA-processing protein 40A
Up-regulated	1	L. rigidum	Undisturbed	TraesCS1A02G025900.2	8.57266	0.000138239	probable serine/threonine-protein kinase WNK2
Up-regulated	1	L. rigidum	Undisturbed	TraesCS7A02G123900.1	8.57188	0.000113022	Protein disulfide isomerase family protein 3-1 alfa [Source:UniProtKB/TrEMBL;Acc:D8L9A3]
Up-regulated	1	L. rigidum	Undisturbed	TraesCS4B02G139000.2	8.56998	0.000331437	GDSL esterase/lipase CPRD49
Up-regulated	1	L. rigidum	Undisturbed	TraesCSU02G128400.1	8.55679	0.000128842	Germin-like protein 8-5
Up-regulated	1	L. rigidum	Undisturbed	TraesCS3D02G362300.1	8.55483	0.0012461	E3 ubiquitin protein ligase [Source:UniProtKB/TrEMBL;Acc:A0A1D5WMR3]
Up-regulated	1	L. rigidum	Undisturbed	TraesCS5A02G362100.4	8.54649	0.00160769	uncharacterized protein LOC109755277
Up-regulated	1	L. rigidum	Undisturbed	TraesCS5A02G491100.2	8.54207	0.00112932	K(+) efflux antiporter 5
Up-regulated	1	L. rigidum	Undisturbed	TraesCS5D02G371100.1	8.53687	9.73189e-05	uncharacterized protein LOC109755277
Up-regulated	1	L. rigidum	Undisturbed	TraesCS7B02G199500.1	8.53331	0.00189968	RNA-binding protein 25
Up-regulated	1	L. rigidum	Undisturbed	TraesCS1D02G091100.3	8.53323	0.000578743	mediator of DNA damage checkpoint protein 1
Up-regulated	1	L. rigidum	Undisturbed	TraesCS7B02G143600.3	8.52357	9.47161e-05	plant intracellular Ras-group-related LRR protein 4-like
Up-regulated	1	L. rigidum	Undisturbed	TraesCS3D02G272700.2	8.51965	0.000848623	homeobox protein HAZ1-like
Up-regulated	1	L. rigidum	Undisturbed	TraesCS5A02G251390.1	8.51176	8.36242e-05	transcription factor BIM2-like
Up-regulated	1	L. rigidum	Undisturbed	TraesCS4A02G335300.1	8.50797	0.000104724	RPM1-interacting protein 4-like
Up-regulated	1	L. rigidum	Undisturbed	TraesCS3B02G276000.4	8.49714	0.00180804	protein IQ-DOMAIN 31-like
Up-regulated	1	L. rigidum	Undisturbed	TraesCS5D02G112600.1	8.49658	9.96934e-05	uncharacterized protein LOC109744557
Up-regulated	1	L. rigidum	Undisturbed	TraesCS1D02G084000.2	8.49523	0.000345234	chromatin structure-remodeling complex protein BSH
Up-regulated	1	L. rigidum	Undisturbed	TraesCS3B02G452800.6	8.49518	0.00109416	unnamed protein product
Up-regulated	1	L. rigidum	Undisturbed	TraesCS2A02G117400.4	8.49439	0.000106968	DNA polymerase [Source:UniProtKB/TrEMBL;Acc:A0A1D5TML1]
Up-regulated	1	L. rigidum	Undisturbed	TraesCS4A02G401400.1	8.49024	0.00320138	methylcrotonoyl-CoA carboxylase beta chain, mitochondrial
Up-regulated	1	L. rigidum	Undisturbed	TraesCS4B02G010400.1	8.48852	0.000219294	flagellar radial spoke protein 5
Up-regulated	1	L. rigidum	Undisturbed	TraesCS7A02G098100.1	8.4856	0.00488334	Cytochrome c oxidase subunit 1 [Source:UniProtKB/TrEMBL;Acc:A0A341XNW6]
Up-regulated	1	L. rigidum	Undisturbed	TraesCS3A02G128500.2	8.47792	9.09947e-05	probable prolyl 4-hydroxylase 7
Up-regulated	1	L. rigidum	Undisturbed	TraesCS4D02G032900.1	8.47669	0.000972868	Lysine--tRNA ligase
Up-regulated	1	L. rigidum	Undisturbed	TraesCSU02G137500.1	8.47625	0.000130892	germin-like protein 8-14
Up-regulated	1	L. rigidum	Undisturbed	TraesCS3D02G392400.1	8.47625	0.000130892	uncharacterized protein LOC109736024
Up-regulated	1	L. rigidum	Undisturbed	TraesCS1B02G392400.1	8.46773	0.000466977	lactation elevated protein 1-like
Up-regulated	1	L. rigidum	Undisturbed	TraesCS3B02G254200.3	8.46772	0.00153181	unnamed protein product
Up-regulated	1	L. rigidum	Undisturbed	TraesCS3A02G205300.1	8.46237	0.0110401	ATP-dependent zinc metalloprotease FTSH 5, mitochondrial
Up-regulated	1	L. rigidum	Undisturbed	TraesCS3A02G408200.1	8.46182	9.63212e-05	Bidirectional sugar transporter SWEET [Source:UniProtKB/TrEMBL;Acc:A0A1D5VCJ6]
Up-regulated	1	L. rigidum	Undisturbed	TraesCS2D02G513500.1	8.45615	0.00207874	4-hydroxy-tetrahydrodipicolinate synthase 1
Up-regulated	1	L. rigidum	Undisturbed	TraesCS4D02G044900.1	8.45105	0.000265616	serine/threonine-protein kinase prp4-like
Up-regulated	1	L. rigidum	Undisturbed	TraesCS7D02G552600.1	8.45105	0.000265616	uncharacterized protein LOC109746070
Up-regulated	1	L. rigidum	Undisturbed	TraesCS5A02G443000.2	8.45003	0.000102737	E3 ubiquitin protein ligase DRIP2-like
Up-regulated	1	L. rigidum	Undisturbed	TraesCS6B02G128000.2	8.45003	0.000102737	zinc transporter 2-like
Up-regulated	1	L. rigidum	Undisturbed	TraesCS3B02G341000.6	8.43421	0.000139708	ubiquitin carboxyl-terminal hydrolase 13-like
Up-regulated	1	L. rigidum	Undisturbed	TraesCS2D02G407800.5	8.43361	0.000108275	probable copper-transporting ATPase HMA5
Up-regulated	1	L. rigidum	Undisturbed	TraesCS1D02G003900.4	8.43304	0.000158857	peroxisomal membrane protein PEX14-like
Up-regulated	1	L. rigidum	Undisturbed	TraesCS3B02G247800.3	8.43075	0.00014479	unnamed protein product
Up-regulated	1	L. rigidum	Undisturbed	TraesCS3B02G113200.2	8.42801	0.000288878	unnamed protein product
Up-regulated	1	L. rigidum	Undisturbed	TraesCS5B02G320100.2	8.42741	0.0057714	Hexosyltransferase [Source:UniProtKB/TrEMBL;Acc:W5FKC1]
Up-regulated	1	L. rigidum	Undisturbed	TraesCS5A02G225700.1	8.42733	0.000196988	transcription factor bHLH66-like
Up-regulated	1	L. rigidum	Undisturbed	TraesCS5A02G380400.1	8.42526	0.000617773	CWF19-like protein 2
Up-regulated	1	L. rigidum	Undisturbed	TraesCS2A02G232900.1	8.42336	0.00021753	filament-like plant protein 3
Up-regulated	1	L. rigidum	Undisturbed	TraesCS3A02G309000.1	8.42269	0.000255199	Glutathione S-transferase 1
Up-regulated	1	L. rigidum	Undisturbed	TraesCS7A02G252000.2	8.42104	0.000194807	Auxin response factor [Source:UniProtKB/TrEMBL;Acc:A0A1D6BUS8]
Up-regulated	1	L. rigidum	Undisturbed	TraesCS5B02G295000.4	8.42008	0.0110142	beta-glucosidase 32
Up-regulated	1	L. rigidum	Undisturbed	TraesCS6A02G161200.2	8.4193	0.00010924	uncharacterized protein LOC109735188
Up-regulated	1	L. rigidum	Undisturbed	TraesCS3B02G296100.13	8.41813	0.00115669	zinc finger protein BRUTUS-like
Up-regulated	1	L. rigidum	Undisturbed	TraesCS7D02G326700.5	8.41409	0.000147028	uncharacterized protein LOC109785830
Up-regulated	1	L. rigidum	Undisturbed	TraesCSU02G126000.1	8.4109	0.00207697	uncharacterized protein LOC109787585
Up-regulated	1	L. rigidum	Undisturbed	TraesCS2A02G258900.3	8.4083	0.000256415	unnamed protein product
Up-regulated	1	L. rigidum	Undisturbed	TraesCS4D02G199900.3	8.40372	0.00110602	rab GTPase-activating protein 1-like
Up-regulated	1	L. rigidum	Undisturbed	TraesCS3B02G142300.4	8.39848	0.000200856	transcriptional corepressor LEUNIG-like
Up-regulated	1	L. rigidum	Undisturbed	TraesCS7A02G188600.1	8.39618	0.0070678	Beta-1,3-galactosyltransferase 15
Up-regulated	1	L. rigidum	Undisturbed	TraesCS3A02G260500.1	8.39556	0.000128608	E3 ubiquitin-protein ligase MBR2-like
Up-regulated	1	L. rigidum	Undisturbed	TraesCS1A02G159500.2	8.38619	0.000171519	putative receptor-like protein kinase At4g00960
Up-regulated	1	L. rigidum	Undisturbed	TraesCS4D02G039400.1	8.38556	0.000122888	uncharacterized protein LOC109776438
Up-regulated	1	L. rigidum	Undisturbed	TraesCS2A02G221200.8	8.37961	0.00342598	TORTIFOLIA1-like protein 1
Up-regulated	1	L. rigidum	Undisturbed	TraesCS4A02G137900.3	8.37237	0.00687803	uncharacterized protein LOC109768767
Up-regulated	1	L. rigidum	Undisturbed	TraesCS7A02G134700.1	8.36839	0.000130782	probable LRR receptor-like serine/threonine-protein kinase At5g10290 isoform
Up-regulated	1	L. rigidum	Undisturbed	TraesCS6A02G052100.1	8.36365	0.000145425	probable serine/threonine-protein kinase PIX13
Up-regulated	1	L. rigidum	Undisturbed	TraesCS1D02G387000.2	8.36243	0.0003291	oligopeptide transporter 7-like
Up-regulated	1	L. rigidum	Undisturbed	TraesCS3D02G397500.1	8.35959	0.00109544	DNA-directed RNA polymerase III subunit RPC4-like
Up-regulated	1	L. rigidum	Undisturbed	TraesCS4D02G234900.3	8.35102	0.000140265	uncharacterized protein LOC109732965
Up-regulated	1	L. rigidum	Undisturbed	TraesCS2A02G228000.3	8.33992	0.00830687	regulator of nonsense transcripts 1 homolog
Up-regulated	1	L. rigidum	Undisturbed	TraesCS5A02G262600.3	8.33896	0.00020438	E3 ubiquitin-protein ligase UPL5
Up-regulated	1	L. rigidum	Undisturbed	TraesCS5A02G029600.2	8.32939	0.00104281	Protein IQ-DOMAIN 1
Up-regulated	1	L. rigidum	Undisturbed	TraesCS7B02G157000.2	8.32477	0.00028902	Uridine kinase [Source:UniProtKB/TrEMBL;Acc:A0A1D6CJK3]
Up-regulated	1	L. rigidum	Undisturbed	TraesCS5D02G163700.1	8.32123	0.000231697	ABC transporter G family member 41-like
Up-regulated	1	L. rigidum	Undisturbed	TraesCS1B02G272200.1	8.32053	0.000158857	MLO-like protein [Source:UniProtKB/TrEMBL;Acc:A0A341P7D1]
Up-regulated	1	L. rigidum	Undisturbed	TraesCS6B02G166700.1	8.31929	0.00194922	unnamed protein product
Up-regulated	1	L. rigidum	Undisturbed	TraesCS4A02G421800.2	8.31914	0.000710393	LRR receptor-like serine/threonine-protein kinase GSO1
Up-regulated	1	L. rigidum	Undisturbed	TraesCS5D02G550000.1	8.31435	0.000416069	uncharacterized protein LOC109738191
Up-regulated	1	L. rigidum	Undisturbed	TraesCS1D02G421100.2	8.31127	0.000398318	fatty acid amide hydrolase
Up-regulated	1	L. rigidum	Undisturbed	TraesCS1A02G407800.3	8.31127	0.000398318	Patatin [Source:UniProtKB/TrEMBL;Acc:W4ZQZ0]
Up-regulated	1	L. rigidum	Undisturbed	TraesCS7B02G478200.3	8.30633	0.00198699	MYB-related protein
Up-regulated	1	L. rigidum	Undisturbed	TraesCS3B02G157000.1	8.2985	0.00364551	unnamed protein product
Up-regulated	1	L. rigidum	Undisturbed	TraesCS5D02G299200.3	8.29615	0.00469222	uncharacterized protein
Up-regulated	1	L. rigidum	Undisturbed	TraesCS5B02G093200.2	8.29572	0.000404509	Nuclear export mediator factor Nemf
Up-regulated	1	L. rigidum	Undisturbed	TraesCS5D02G291500.1	8.28284	0.00366025	ubiquitin carboxyl-terminal hydrolase 16-like
Up-regulated	1	L. rigidum	Undisturbed	TraesCS5D02G018100.5	8.28254	0.000356262	CSC1-like protein RXW8
Up-regulated	1	L. rigidum	Undisturbed	TraesCS1A02G005600.2	8.28033	0.00160786	transcription initiation factor TFIID subunit 6
Up-regulated	1	L. rigidum	Undisturbed	TraesCS7D02G323000.2	8.27937	0.000208617	S-acyltransferase [Source:UniProtKB/TrEMBL;Acc:A0A1D6CTA0]
Up-regulated	1	L. rigidum	Undisturbed	TraesCS5D02G489200.1	8.27858	0.00021094	uncharacterized protein LOC109782942
Up-regulated	1	L. rigidum	Undisturbed	TraesCS4A02G126200.2	8.26666	0.000363021	Glucose-6-phosphate 1-dehydrogenase [Source:UniProtKB/TrEMBL;Acc:W5DWK1]
Up-regulated	1	L. rigidum	Undisturbed	TraesCS2D02G335900.1	8.26191	0.00565576	protein NBR1 homolog
Up-regulated	1	L. rigidum	Undisturbed	TraesCS3A02G298900.3	8.25907	0.0019413	putative ATP-dependent RNA helicase YTHDC2
Up-regulated	1	L. rigidum	Undisturbed	TraesCS3D02G369700.1	8.25648	0.00111558	unnamed protein product
Up-regulated	1	L. rigidum	Undisturbed	TraesCS3B02G230100.1	8.25425	0.000332934	callose synthase 7-like
Up-regulated	1	L. rigidum	Undisturbed	TraesCS3A02G187500.4	8.25319	0.000313455	unnamed protein product
Up-regulated	1	L. rigidum	Undisturbed	TraesCS5A02G491500.1	8.25099	0.00102482	myosin heavy chain, embryonic smooth muscle isoform
Up-regulated	1	L. rigidum	Undisturbed	TraesCS5B02G497700.2	8.24474	0.000246412	Urease [Source:UniProtKB/TrEMBL;Acc:A0A1D5ZAB6]
Up-regulated	1	L. rigidum	Undisturbed	TraesCS2A02G432100.2	8.24312	0.00565576	alpha-1,2-Mannosidase [Source:UniProtKB/TrEMBL;Acc:A0A1D5TFD4]
Up-regulated	1	L. rigidum	Undisturbed	TraesCS1D02G379000.4	8.24065	0.000435973	lactation elevated protein 1-like
Up-regulated	1	L. rigidum	Undisturbed	TraesCS2B02G239300.2	8.24011	0.000710393	pentatricopeptide repeat-containing protein At4g18975, chloroplastic
Up-regulated	1	L. rigidum	Undisturbed	TraesCS2A02G287900.5	8.23764	0.00388966	protein MEI2-like 4
Up-regulated	1	L. rigidum	Undisturbed	TraesCS7D02G414300.2	8.2328	0.000308141	probable aminodeoxychorismate synthase, chloroplastic
Up-regulated	1	L. rigidum	Undisturbed	TraesCS4A02G169200.3	8.22963	0.00838776	auxilin-related protein 1-like
Up-regulated	1	L. rigidum	Undisturbed	TraesCS1A02G411500.1	8.22497	0.00025964	hypothetical protein TRIUR3_11544;
Up-regulated	1	L. rigidum	Undisturbed	TraesCS7B02G158700.4	8.22119	0.00291918	uncharacterized aarF domain-containing protein kinase At5g05200, chloroplastic
Up-regulated	1	L. rigidum	Undisturbed	TraesCS4B02G382300.2	8.22094	0.0107444	cytochrome P450 716B1-like
Up-regulated	1	L. rigidum	Undisturbed	TraesCS1D02G135400.1	8.2119	0.000258735	transcription initiation factor IIF subunit alpha
Up-regulated	1	L. rigidum	Undisturbed	TraesCS6A02G309600.3	8.21104	0.000292218	unnamed protein product
Up-regulated	1	L. rigidum	Undisturbed	TraesCS5D02G129900.2	8.20758	0.00687863	uncharacterized protein LOC109737355
Up-regulated	1	L. rigidum	Undisturbed	TraesCS7A02G440200.2	8.20453	0.000880367	putative disease resistance RPP13-like protein 3
Up-regulated	1	L. rigidum	Undisturbed	TraesCS3D02G217800.2	8.20187	0.00362202	transcription factor SRM1-like
Up-regulated	1	L. rigidum	Undisturbed	TraesCS3A02G155600.1	8.19699	0.000358265	activating signal cointegrator 1 complex subunit 1
Up-regulated	1	L. rigidum	Undisturbed	TraesCS4A02G139300.7	8.19699	0.000358265	lysine-specific demethylase JMJ25
Up-regulated	1	L. rigidum	Undisturbed	TraesCS5D02G200300.1	8.19646	0.00094891	FAD synthetase, chloroplastic-like
Up-regulated	1	L. rigidum	Undisturbed	TraesCS6D02G183700.1	8.19646	0.00094891	unnamed protein product
Up-regulated	1	L. rigidum	Undisturbed	TraesCS7A02G559300.3	8.19324	0.000587682	uncharacterized protein LOC109760071
Up-regulated	1	L. rigidum	Undisturbed	TraesCS3D02G061900.1	8.18986	0.000312328	indole-2-monooxygenase-like
Up-regulated	1	L. rigidum	Undisturbed	TraesCS6B02G022800.1	8.18793	0.00294154	Cytosine-specific methyltransferase [Source:UniProtKB/TrEMBL;Acc:A0A1D6AVC8]
Up-regulated	1	L. rigidum	Undisturbed	TraesCS5D02G314200.3	8.18228	0.00448899	uncharacterized protein LOC109751772
Up-regulated	1	L. rigidum	Undisturbed	TraesCS3A02G424900.4	8.18011	0.000410358	protein CPR-5-like
Up-regulated	1	L. rigidum	Undisturbed	TraesCS5D02G071900.1	8.1774	0.000370409	cold-responsive protein kinase 1
Up-regulated	1	L. rigidum	Undisturbed	TraesCS7A02G453200.1	8.17682	0.000950762	transcription initiation factor TFIID subunit 7-like
Up-regulated	1	L. rigidum	Undisturbed	TraesCS3A02G352600.1	8.17359	0.000712135	interactor of constitutive active ROPs 2, chloroplastic-like
Up-regulated	1	L. rigidum	Undisturbed	TraesCS1D02G176100.4	8.16117	0.000318801	kinesin-like protein KIN-7K, chloroplastic
Up-regulated	1	L. rigidum	Undisturbed	TraesCS1A02G357500.2	8.15924	0.000614638	protein IQ-DOMAIN 31-like
Up-regulated	1	L. rigidum	Undisturbed	TraesCS1D02G405800.4	8.15754	0.000386177	E3 ubiquitin-protein ligase MBR2-like
Up-regulated	1	L. rigidum	Undisturbed	TraesCS2A02G040300.1	8.15025	0.000404156	Glycosyltransferases [Source:UniProtKB/TrEMBL;Acc:A0A1D5TJ09]
Up-regulated	1	L. rigidum	Undisturbed	TraesCS1B02G274000.1	8.1466	0.000321848	zinc finger CCCH domain-containing protein 44-like
Up-regulated	1	L. rigidum	Undisturbed	TraesCS7B02G150600.4	8.14242	0.00134553	Calcium-transporting ATPase [Source:UniProtKB/TrEMBL;Acc:A0A341YSV0]
Up-regulated	1	L. rigidum	Undisturbed	TraesCS2D02G016900.2	8.13836	0.000363021	protein DA1-related 1-like
Up-regulated	1	L. rigidum	Undisturbed	TraesCS3B02G276100.1	8.13464	0.00037643	probable inactive tRNA-specific adenosine deaminase-like protein 3
Up-regulated	1	L. rigidum	Undisturbed	TraesCS1B02G347900.2	8.1291	0.000349454	Auxin response factor [Source:UniProtKB/TrEMBL;Acc:A0A1D6D994]
Up-regulated	1	L. rigidum	Undisturbed	TraesCS1B02G089600.2	8.12774	0.00153151	hypothetical protein TRIUR3_16869
Up-regulated	1	L. rigidum	Undisturbed	TraesCS1A02G221000.1	8.12633	0.000346809	D-3-phosphoglycerate dehydrogenase 1, chloroplastic
Up-regulated	1	L. rigidum	Undisturbed	TraesCS5D02G123100.2	8.12633	0.000346809	RING-type E3 ubiquitin transferase [Source:UniProtKB/TrEMBL;Acc:A0A341WBK3]
Up-regulated	1	L. rigidum	Undisturbed	TraesCS7A02G264000.2	8.12633	0.000346809	uncharacterized protein At1g04910
Up-regulated	1	L. rigidum	Undisturbed	TraesCS2D02G303400.1	8.12491	0.00161778	uncharacterized protein LOC109759476
Up-regulated	1	L. rigidum	Undisturbed	TraesCS4A02G211700.3	8.12202	0.00135025	transcriptional corepressor SEUSS-like
Up-regulated	1	L. rigidum	Undisturbed	TraesCS5D02G333700.1	8.11797	0.000410358	DNA-(apurinic or apyrimidinic site) lyase 2
Up-regulated	1	L. rigidum	Undisturbed	TraesCS5B02G024300.1	8.11322	0.00999027	protein downstream neighbor of Son-like
Up-regulated	1	L. rigidum	Undisturbed	TraesCS3B02G291100.3	8.11235	0.000487812	ABC transporter B family member 4-like
Up-regulated	1	L. rigidum	Undisturbed	TraesCS3D02G113100.3	8.10952	0.000546789	protein TWIN LOV 1
Up-regulated	1	L. rigidum	Undisturbed	TraesCS1A02G158600.2	8.10296	0.00038866	unnamed protein product
Up-regulated	1	L. rigidum	Undisturbed	TraesCS2D02G241300.3	8.10108	0.0109209	regulator of nonsense transcripts 1 homolog
Up-regulated	1	L. rigidum	Undisturbed	TraesCS4B02G054700.1	8.09804	0.00108745	ABC transporter G family member 41-like
Up-regulated	1	L. rigidum	Undisturbed	TraesCS5B02G390900.1	8.0973	0.000467782	Dirigent protein [Source:UniProtKB/TrEMBL;Acc:A0A341ZF53]
Up-regulated	1	L. rigidum	Undisturbed	TraesCS4A02G119000.1	8.09522	0.00320651	uncharacterized protein LOC109734747
Up-regulated	1	L. rigidum	Undisturbed	TraesCS5A02G162800.2	8.09237	0.0100121	FCA protein
Up-regulated	1	L. rigidum	Undisturbed	TraesCS2D02G589500.1	8.09224	0.00268636	probable glutathione S-transferase
Up-regulated	1	L. rigidum	Undisturbed	TraesCS2B02G606600.1	8.09218	0.00155865	Cytochrome P450 89A2
Up-regulated	1	L. rigidum	Undisturbed	TraesCS4D02G088200.1	8.09218	0.00155865	Sucrose-phosphate synthase [Source:UniProtKB/TrEMBL;Acc:Q6EZE8]
Up-regulated	1	L. rigidum	Undisturbed	TraesCS7D02G276100.1	8.08971	0.000728756	O-fucosyltransferase 6
Up-regulated	1	L. rigidum	Undisturbed	TraesCS7B02G190000.1	8.08323	0.00551367	65-kDa microtubule-associated protein 1-like
Up-regulated	1	L. rigidum	Undisturbed	TraesCS4D02G237100.4	8.0774	0.00116185	transcription factor bHLH76-like
Up-regulated	1	L. rigidum	Undisturbed	TraesCS2A02G232200.1	8.07722	0.00448899	transmembrane E3 ubiquitin-protein ligase 1-like
Up-regulated	1	L. rigidum	Undisturbed	TraesCSU02G180500.1	8.07722	0.00448899	uncharacterized protein LOC109777743
Up-regulated	1	L. rigidum	Undisturbed	TraesCS5D02G082000.2	8.07445	0.000999211	dynamin-related protein 3B-like
Up-regulated	1	L. rigidum	Undisturbed	TraesCS7D02G447100.1	8.06954	0.00045249	Mediator of RNA polymerase II transcription subunit 17 [Source:UniProtKB/TrEMBL;Acc:A0A1D6CU38]
Up-regulated	1	L. rigidum	Undisturbed	TraesCS5D02G170100.4	8.06858	0.000744107	histone-lysine N-methyltransferase TRX1
Up-regulated	1	L. rigidum	Undisturbed	TraesCS4B02G059100.2	8.06802	0.00862231	Glutathione S-transferase 2
Up-regulated	1	L. rigidum	Undisturbed	TraesCS2A02G304900.2	8.06665	0.000454775	ATP-dependent DNA helicase Q-like 4A
Up-regulated	1	L. rigidum	Undisturbed	TraesCS4A02G178600.3	8.06087	0.000489655	ATP-dependent DNA helicase [Source:UniProtKB/TrEMBL;Acc:A0A341TM73]
Up-regulated	1	L. rigidum	Undisturbed	TraesCS3A02G012800.2	8.05796	0.000566098	pentatricopeptide repeat-containing protein At1g63070, mitochondrial-like
Up-regulated	1	L. rigidum	Undisturbed	TraesCS3B02G385200.1	8.05272	0.00321135	interactor of constitutive active ROPs 2, chloroplastic-like
Up-regulated	1	L. rigidum	Undisturbed	TraesCS3D02G307700.5	8.05107	0.000493498	double-stranded RNA-binding protein 1-like
Up-regulated	1	L. rigidum	Undisturbed	TraesCS4A02G095000.2	8.0466	0.00287259	unnamed protein product
Up-regulated	1	L. rigidum	Undisturbed	TraesCS5A02G276700.5	8.04523	0.000500442	Calcium-transporting ATPase [Source:UniProtKB/TrEMBL;Acc:A0A341UZT3]
Up-regulated	1	L. rigidum	Undisturbed	TraesCS5B02G201300.3	8.0405	0.00156515	type IV inositol polyphosphate 5-phosphatase 9-like
Up-regulated	1	L. rigidum	Undisturbed	TraesCS1B02G154800.3	8.04042	0.0043612	Transcription initiation factor IIA subunit 1
Up-regulated	1	L. rigidum	Undisturbed	TraesCS6A02G369000.1	8.04017	0.00128259	N-alpha-acetyltransferase 35, NatC auxiliary subunit
Up-regulated	1	L. rigidum	Undisturbed	TraesCS1B02G083900.4	8.0373	0.00541883	E3 SUMO-protein ligase SIZ1
Up-regulated	1	L. rigidum	Undisturbed	TraesCS4D02G145100.9	8.03443	0.0011945	uncharacterized protein
Up-regulated	1	L. rigidum	Undisturbed	TraesCS3A02G525100.2	8.03101	0.00880667	drought induced 19 protein
Up-regulated	1	L. rigidum	Undisturbed	TraesCS1B02G243900.2	8.02645	0.000544579	putative E3 ubiquitin-protein ligase LIN-1
Up-regulated	1	L. rigidum	Undisturbed	TraesCS6B02G295300.1	8.02539	0.000793681	uncharacterized protein LOC109741426
Up-regulated	1	L. rigidum	Undisturbed	TraesCSU02G188700.1	8.02266	1.05465e-10	probable inactive serine/threonine-protein kinase bub1
Up-regulated	1	L. rigidum	Undisturbed	TraesCS3B02G245600.2	8.02044	2.19577e-10	probable receptor-like protein kinase At2g42960
Up-regulated	1	L. rigidum	Undisturbed	TraesCS1A02G001900.10	8.01533	0.00678496	peroxisomal membrane protein PEX14-like
Up-regulated	1	L. rigidum	Undisturbed	TraesCS1B02G433400.4	8.00898	0.00292823	unnamed protein product
Up-regulated	1	L. rigidum	Undisturbed	TraesCS3D02G399500.2	8.00742	0.000592185	uncharacterized protein LOC109781409
Up-regulated	1	L. rigidum	Undisturbed	TraesCS3B02G273900.2	8.00258	0.00832268	homeobox-DDT domain protein RLT2-like
Up-regulated	1	L. rigidum	Undisturbed	TraesCS3D02G346600.1	8.00026	0.000741209	interactor of constitutive active ROPs 2, chloroplastic-like
Up-regulated	1	L. rigidum	Undisturbed	TraesCS2B02G321500.2	7.99838	0.000684572	uncharacterized protein LOC109759476
Up-regulated	1	L. rigidum	Undisturbed	TraesCS2D02G382600.2	7.99296	0.00232637	beta-fructofuranosidase 1-like
Up-regulated	1	L. rigidum	Undisturbed	TraesCS7B02G114200.4	7.9778	0.000780384	carbon catabolite repressor protein 4 homolog 3
Up-regulated	1	L. rigidum	Undisturbed	TraesCS7B02G272800.1	7.97381	0.00161782	unnamed protein product
Up-regulated	1	L. rigidum	Undisturbed	TraesCS1D02G201100.2	7.97353	0.00556517	uncharacterized protein LOC109744571
Up-regulated	1	L. rigidum	Undisturbed	TraesCS7D02G114100.3	7.96659	0.00113042	ABC transporter C family member 10-like
Up-regulated	1	L. rigidum	Undisturbed	TraesCS2B02G325600.9	7.9655	0.000673488	regulator of nonsense transcripts UPF3
Up-regulated	1	L. rigidum	Undisturbed	TraesCS2D02G302000.3	7.96378	0.00327527	F-box protein 7
Up-regulated	1	L. rigidum	Undisturbed	TraesCS2D02G179600.2	7.96124	0.000995501	nuclear transcription factor Y subunit A-7-like
Up-regulated	1	L. rigidum	Undisturbed	TraesCS7B02G127000.2	7.95732	0.00230573	enhancer of mRNA-decapping protein 4-like
Up-regulated	1	L. rigidum	Undisturbed	TraesCS3A02G143500.1	7.95386	0.00239605	unnamed protein product
Up-regulated	1	L. rigidum	Undisturbed	TraesCS5B02G462100.2	7.94039	0.00170174	exocyst complex component EXO84B-like
Up-regulated	1	L. rigidum	Undisturbed	TraesCS1D02G317500.1	7.93716	0.00202525	probable LRR receptor-like serine/threonine-protein kinase At3g47570
Up-regulated	1	L. rigidum	Undisturbed	TraesCS5B02G103500.2	7.93063	0.00292823	WEB family protein At5g55860-lik
Up-regulated	1	L. rigidum	Undisturbed	TraesCS2B02G021100.2	7.92866	0.000842058	nodulin homeobox-like
Up-regulated	1	L. rigidum	Undisturbed	TraesCS3A02G330200.2	7.9276	0.0016684	DNA-(apurinic or apyrimidinic site) lyase [Source:UniProtKB/TrEMBL;Acc:A0A341S3R1]
Up-regulated	1	L. rigidum	Undisturbed	TraesCS5D02G260800.4	7.92721	0.00560238	cellulose synthase-like protein E6
Up-regulated	1	L. rigidum	Undisturbed	TraesCS3D02G530300.2	7.92347	0.00139548	protein DEHYDRATION-INDUCED 19 homolog 5-like
Up-regulated	1	L. rigidum	Undisturbed	TraesCS6B02G015400.1	7.92347	0.00139548	WAT1-related protein [Source:UniProtKB/TrEMBL;Acc:A0A341X1C6]
Up-regulated	1	L. rigidum	Undisturbed	TraesCS5B02G122300.4	7.92064	0.00548461	nucleolar protein 6
Up-regulated	1	L. rigidum	Undisturbed	TraesCS3D02G348300.2	7.91373	0.0103477	SAC3 family protein A-like
Up-regulated	1	L. rigidum	Undisturbed	TraesCS5D02G131700.1	7.91044	0.0110836	phosphatidylinositol N-acetylglucosaminyltransferase subunit A-like
Up-regulated	1	L. rigidum	Undisturbed	TraesCS2B02G007400.2	7.90955	0.00112396	putative L-type lectin-domain containing receptor kinase
Up-regulated	1	L. rigidum	Undisturbed	TraesCS2B02G449100.3	7.89738	0.0013011	organic cation/carnitine transporter 7
Up-regulated	1	L. rigidum	Undisturbed	TraesCS3D02G409200.2	7.89541	0.000950762	integrator complex subunit 9
Up-regulated	1	L. rigidum	Undisturbed	TraesCS6A02G099800.2	7.89217	0.00101167	Zinc transporter 2
Up-regulated	1	L. rigidum	Undisturbed	TraesCS6B02G432800.1	7.88994	0.00282588	Auxin-responsive protein [Source:UniProtKB/TrEMBL;Acc:A0A341X497]
Up-regulated	1	L. rigidum	Undisturbed	TraesCS2B02G189600.1	7.88978	0.00301903	serine/threonine-protein kinase SAPK2
Up-regulated	1	L. rigidum	Undisturbed	TraesCS7B02G348600.1	7.88892	0.00118232	external alternative NAD(P)H-ubiquinone oxidoreductase B1, mitochondrial
Up-regulated	1	L. rigidum	Undisturbed	TraesCS3A02G516400.2	7.88759	0.00106589	ABC transporter D family member 1-like
Up-regulated	1	L. rigidum	Undisturbed	TraesCSU02G059500.1	7.88564	0.00131704	BTB/POZ domain-containing protein FBL11
Up-regulated	1	L. rigidum	Undisturbed	TraesCS2A02G505200.2	7.88299	0.00453533	G-type lectin S-receptor-like serine/threonine-protein kinase At2g19130
Up-regulated	1	L. rigidum	Undisturbed	TraesCS3B02G261800.2	7.88108	0.000995413	zinc finger CCCH domain-containing protein 9-like
Up-regulated	1	L. rigidum	Undisturbed	TraesCS5B02G155300.3	7.87782	0.000995501	uncharacterized protein LOC109787646
Up-regulated	1	L. rigidum	Undisturbed	TraesCS7B02G363700.2	7.87568	0.00203925	3-hydroxyisobutyrate dehydrogenase [Source:UniProtKB/TrEMBL;Acc:A0A1D6C8P8]
Up-regulated	1	L. rigidum	Undisturbed	TraesCS5B02G403200.3	7.87323	0.0013461	TIP41-like protein
Up-regulated	1	L. rigidum	Undisturbed	TraesCS7D02G339200.2	7.86798	0.00116153	Hexosyltransferase [Source:UniProtKB/TrEMBL;Acc:W5I064]
Up-regulated	1	L. rigidum	Undisturbed	TraesCS4D02G334600.1	7.86798	0.00116153	uncharacterized protein LOC109754261
Up-regulated	1	L. rigidum	Undisturbed	TraesCS2D02G257500.4	7.86798	0.00116153	unnamed protein product
Up-regulated	1	L. rigidum	Undisturbed	TraesCS5A02G093600.1	7.85855	0.00565576	respiratory burst oxidase homolog protein B-like
Up-regulated	1	L. rigidum	Undisturbed	TraesCS7A02G419500.1	7.85543	0.0018038	Heavy metal transporting P1B-ATPase 2 [Source:UniProtKB/TrEMBL;Acc:A0A060A1L0]
Up-regulated	1	L. rigidum	Undisturbed	TraesCS2A02G315000.3	7.85543	0.0018038	protein PAIR1-like
Up-regulated	1	L. rigidum	Undisturbed	TraesCS2A02G591700.1	7.85339	0.00110723	uncharacterized protein LOC109772560
Up-regulated	1	L. rigidum	Undisturbed	TraesCS5B02G442900.1	7.85151	0.00885266	Pathogenesis-related protein 1-6 [Source:UniProtKB/TrEMBL;Acc:A0A0A7ABV0]
Up-regulated	1	L. rigidum	Undisturbed	TraesCS4A02G283000.2	7.85134	0.00469222	unnamed protein product
Up-regulated	1	L. rigidum	Undisturbed	TraesCS5B02G529300.3	7.84673	0.00123386	unnamed protein product
Up-regulated	1	L. rigidum	Undisturbed	TraesCS7B02G492000.1	7.84197	0.00119119	putative disease resistance protein RGA3
Up-regulated	1	L. rigidum	Undisturbed	TraesCS4B02G227800.1	7.83191	0.00120377	cell cycle checkpoint protein RAD17
Up-regulated	1	L. rigidum	Undisturbed	TraesCS2D02G531600.2	7.82516	0.00131704	double-strand break repair protein MRE11
Up-regulated	1	L. rigidum	Undisturbed	TraesCS7B02G129700.2	7.8149	0.00180499	Phosphate transporter PHO1-3
Up-regulated	1	L. rigidum	Undisturbed	TraesCS3B02G210100.2	7.81143	0.00222836	pentatricopeptide repeat-containing protein At5g57250, mitochondrial
Up-regulated	1	L. rigidum	Undisturbed	TraesCS1B02G342100.2	7.81009	0.00131704	probable E3 ubiquitin ligase SUD1
Up-regulated	1	L. rigidum	Undisturbed	TraesCS2A02G116100.1	7.80793	0.00261135	myb family transcription factor EFM-like
Up-regulated	1	L. rigidum	Undisturbed	TraesCS2A02G426200.1	7.80668	0.00133958	putative ethylene constitutive triple response protein
Up-regulated	1	L. rigidum	Undisturbed	TraesCS3B02G277500.3	7.80472	0.0111641	myosin-17-like
Up-regulated	1	L. rigidum	Undisturbed	TraesCS5D02G148900.1	7.80085	0.00371447	NAC domain-containing protein 77-like
Up-regulated	1	L. rigidum	Undisturbed	TraesCS7B02G218000.3	7.80085	0.00371447	polyadenylate-binding protein-interacting protein 11
Up-regulated	1	L. rigidum	Undisturbed	TraesCS1B02G466300.1	7.79286	0.00186337	phosphoglucan phosphatase LSF1, chloroplastic
Up-regulated	1	L. rigidum	Undisturbed	TraesCS1B02G374100.1	7.79	0.00687803	protein IQ-DOMAIN 31-like
Up-regulated	1	L. rigidum	Undisturbed	TraesCS2A02G007500.2	7.79	0.00687803	protein NRT1/ PTR FAMILY 8.5-like
Up-regulated	1	L. rigidum	Undisturbed	TraesCS1A02G199000.1	7.78304	0.00222076	phagocyte signaling-impaired protein
Up-regulated	1	L. rigidum	Undisturbed	TraesCS1A02G267900.1	7.78261	0.0112235	potassium channel AKT2
Up-regulated	1	L. rigidum	Undisturbed	TraesCS2D02G433100.4	7.78261	0.0112235	serine/threonine-protein kinase minibrain-like
Up-regulated	1	L. rigidum	Undisturbed	TraesCS7A02G561900.4	7.78235	0.00695404	putative disease resistance protein At1g50180
Up-regulated	1	L. rigidum	Undisturbed	TraesCS6A02G063300.2	7.78224	0.00313409	serine/threonine-protein kinase Nek3-like
Up-regulated	1	L. rigidum	Undisturbed	TraesCS7A02G423100.1	7.78101	0.00150711	GATA transcription factor 20-like
Up-regulated	1	L. rigidum	Undisturbed	TraesCS2B02G529000.1	7.7795	0.00195778	ABC transporter C family member 10-like
Up-regulated	1	L. rigidum	Undisturbed	TraesCS6B02G432000.1	7.7795	0.00195778	Actin-related protein 2/3 complex subunit [Source:UniProtKB/TrEMBL;Acc:A0A341XL93]
Up-regulated	1	L. rigidum	Undisturbed	TraesCS3A02G000200.1	7.77864	0.00376693	Subtilisin-like protease
Up-regulated	1	L. rigidum	Undisturbed	TraesCS1B02G480400.3	7.77135	0.00393853	Zinc finger CCCH domain-containing protein 37
Up-regulated	1	L. rigidum	Undisturbed	TraesCS5B02G196800.2	7.76335	0.00256103	CST complex subunit CTC1
Up-regulated	1	L. rigidum	Undisturbed	TraesCS1B02G186200.3	7.76016	0.0108127	unnamed protein product
Up-regulated	1	L. rigidum	Undisturbed	TraesCS5B02G228300.2	7.75985	0.00814644	fructose-bisphosphate aldolase-lysine N-methyltransferase, chloroplastic
Up-regulated	1	L. rigidum	Undisturbed	TraesCS1A02G141400.2	7.75973	0.00296869	ABC transporter G family member 28-like
Up-regulated	1	L. rigidum	Undisturbed	TraesCS5D02G559100.3	7.75973	0.00296869	putative disease resistance protein RGA3
Up-regulated	1	L. rigidum	Undisturbed	TraesCS6A02G187300.1	7.75841	0.0015003	cysteine synthase-like
Up-regulated	1	L. rigidum	Undisturbed	TraesCS2B02G184500.1	7.7561	0.00695404	transcription factor MYB124-like
Up-regulated	1	L. rigidum	Undisturbed	TraesCS5B02G489100.2	7.74258	0.00162984	unnamed protein product
Up-regulated	1	L. rigidum	Undisturbed	TraesCS2A02G387400.2	7.73902	0.00160266	Kinesin-like protein
Up-regulated	1	L. rigidum	Undisturbed	TraesCS4B02G398400.2	7.73186	0.0016677	serine/threonine-protein kinase 4-like
Up-regulated	1	L. rigidum	Undisturbed	TraesCS3D02G329400.1	7.72943	0.00439612	Transcription factor GAMYB
Up-regulated	1	L. rigidum	Undisturbed	TraesCS3A02G405900.3	7.72661	0.00209799	zinc finger CCCH domain-containing protein 19-like
Up-regulated	1	L. rigidum	Undisturbed	TraesCS5A02G405000.2	7.72464	0.002095	protein PHLOEM PROTEIN 2-LIKE A10
Up-regulated	1	L. rigidum	Undisturbed	TraesCS7D02G233400.1	7.72464	0.002095	RING-type E3 ubiquitin transferase [Source:UniProtKB/TrEMBL;Acc:A0A341YWU3]
Up-regulated	1	L. rigidum	Undisturbed	TraesCS5D02G531600.1	7.72298	0.00194757	inner membrane protein PPF-1, chloroplastic-like
Up-regulated	1	L. rigidum	Undisturbed	TraesCS4D02G000700.1	7.72187	0.00700833	P-loop NTPase domain-containing protein LPA1 homolog
Up-regulated	1	L. rigidum	Undisturbed	TraesCS6A02G174100.1	7.7218	0.00476502	glycerophosphodiester phosphodiesterase GDPDL7-like
Up-regulated	1	L. rigidum	Undisturbed	TraesCS6D02G187100.1	7.71731	0.00268988	CMP-sialic acid transporter 5
Up-regulated	1	L. rigidum	Undisturbed	TraesCS3D02G251400.4	7.71731	0.00268988	receptor-like serine/threonine-protein kinase ALE2
Up-regulated	1	L. rigidum	Undisturbed	TraesCS3B02G323100.2	7.71731	0.00268988	unnamed protein product
Up-regulated	1	L. rigidum	Undisturbed	TraesCS1B02G176000.2	7.71055	0.00289495	cytokinin oxidase/dehydrogenase 8
Up-regulated	1	L. rigidum	Undisturbed	TraesCS6D02G235700.2	7.70986	0.00370539	transcription factor bHLH123-like
Up-regulated	1	L. rigidum	Undisturbed	TraesCS6B02G062400.2	7.70683	0.00255574	acylamino-acid-releasing enzyme 2-like
Up-regulated	1	L. rigidum	Undisturbed	TraesCS3A02G339600.2	7.70683	0.00255574	NAC transcription factor 4 [Source:UniProtKB/TrEMBL;Acc:D9HQE0]
Up-regulated	1	L. rigidum	Undisturbed	TraesCS7A02G285500.1	7.70609	0.00445923	polypyrimidine tract-binding protein homolog 1-like
Up-regulated	1	L. rigidum	Undisturbed	TraesCS7A02G283600.1	7.70214	0.00658476	unnamed protein product
Up-regulated	1	L. rigidum	Undisturbed	TraesCS5A02G237300.2	7.70114	0.00204336	unnamed protein product
Up-regulated	1	L. rigidum	Undisturbed	TraesCS5D02G270200.2	7.69943	0.00203925	E3 ubiquitin-protein ligase UPL5
Up-regulated	1	L. rigidum	Undisturbed	TraesCS7A02G553800.3	7.69445	0.00479394	protein LHY-like
Up-regulated	1	L. rigidum	Undisturbed	TraesCS2D02G277000.2	7.69372	0.00277991	ras GTPase-activating protein-binding protein 1
Up-regulated	1	L. rigidum	Undisturbed	TraesCS6D02G319300.1	7.69372	0.00277991	tyrosine aminotransferase-like
Up-regulated	1	L. rigidum	Undisturbed	TraesCS5D02G218600.1	7.69206	0.00195778	uncharacterized protein LOC109774120
Up-regulated	1	L. rigidum	Undisturbed	TraesCS7B02G313700.4	7.69206	0.00195778	unnamed protein product
Up-regulated	1	L. rigidum	Undisturbed	TraesCS2D02G312800.1	7.69062	0.00401586	uncharacterized protein LOC109747607
Up-regulated	1	L. rigidum	Undisturbed	TraesCS2D02G111500.1	7.68682	0.00343099	putative disease resistance protein RGA4
Up-regulated	1	L. rigidum	Undisturbed	TraesCS6D02G075000.2	7.67925	0.00261393	E3 ubiquitin-protein ligase MIEL1-like
Up-regulated	1	L. rigidum	Undisturbed	TraesCS3B02G461200.1	7.67726	0.00215922	protein CPR-5-like
Up-regulated	1	L. rigidum	Undisturbed	TraesCS5A02G377000.5	7.67549	0.00235142	Copper transporter [Source:UniProtKB/TrEMBL;Acc:U5N3V3]
Up-regulated	1	L. rigidum	Undisturbed	TraesCS1A02G154700.1	7.65674	0.0021675	transportin MOS14
Up-regulated	1	L. rigidum	Undisturbed	TraesCS2D02G193400.2	7.6423	0.0106613	LOB domain-containing protein 37-like
Up-regulated	1	L. rigidum	Undisturbed	TraesCS1A02G270600.1	7.64148	0.00315891	embryogenesis-associated protein EMB8-like
Up-regulated	1	L. rigidum	Undisturbed	TraesCS7B02G161200.3	7.64148	0.00315891	unnamed protein product
Up-regulated	1	L. rigidum	Undisturbed	TraesCS3B02G176600.2	7.63759	0.00395186	mitochondrial carrier protein MTM1-like
Up-regulated	1	L. rigidum	Undisturbed	TraesCS5B02G300300.2	7.63759	0.00395186	mitochondrial uncoupling protein 5-like
Up-regulated	1	L. rigidum	Undisturbed	TraesCS3B02G008600.1	7.63759	0.00395186	proline-rich receptor-like protein kinase PERK8
Up-regulated	1	L. rigidum	Undisturbed	TraesCS4D02G114200.2	7.63589	0.00233005	HVA22-like protein
Up-regulated	1	L. rigidum	Undisturbed	TraesCS1B02G019100.1	7.63366	0.0047115	ras-related protein RABD1-like
Up-regulated	1	L. rigidum	Undisturbed	TraesCS5A02G214800.1	7.63208	0.00236082	cytochrome P450 71A1-like
Up-regulated	1	L. rigidum	Undisturbed	TraesCS7B02G201500.1	7.62162	0.00862231	putative glycerol-3-phosphate transporter 1
Up-regulated	1	L. rigidum	Undisturbed	TraesCS3D02G124100.2	7.62133	0.00815723	transcription factor GTE9-like
Up-regulated	1	L. rigidum	Undisturbed	TraesCS4B02G136100.2	7.61861	0.00259861	Clathrin heavy chain [Source:UniProtKB/TrEMBL;Acc:A0A341U4W3]
Up-regulated	1	L. rigidum	Undisturbed	TraesCS4D02G205600.2	7.61752	0.0107481	uncharacterized protein LOC109741871
Up-regulated	1	L. rigidum	Undisturbed	TraesCS5A02G187000.1	7.61726	0.00665222	uncharacterized protein LOC109777378
Up-regulated	1	L. rigidum	Undisturbed	TraesCS6A02G380300.2	7.61322	0.00552388	unnamed protein product
Up-regulated	1	L. rigidum	Undisturbed	TraesCS2A02G562000.2	7.61266	0.00379919	Glycosyltransferase [Source:UniProtKB/TrEMBL;Acc:W5APS1]
Up-regulated	1	L. rigidum	Undisturbed	TraesCS2A02G523400.1	7.61086	0.00236611	shikimate kinase 3, chloroplastic
Up-regulated	1	L. rigidum	Undisturbed	TraesCS2B02G431200.2	7.60698	0.00258226	protein TRIGALACTOSYLDIACYLGLYCEROL 1, chloroplastic
Up-regulated	1	L. rigidum	Undisturbed	TraesCS4A02G033500.1	7.60464	0.0057714	Mavicyanin
Up-regulated	1	L. rigidum	Undisturbed	TraesCS7B02G374800.1	7.59918	0.00279795	Germin-like protein 8-9
Up-regulated	1	L. rigidum	Undisturbed	TraesCS5A02G049200.2	7.59918	0.00279795	protein RRNAD1
Up-regulated	1	L. rigidum	Undisturbed	TraesCS2A02G516800.1	7.59326	0.00293869	aromatic-L-amino-acid decarboxylase-like
Up-regulated	1	L. rigidum	Undisturbed	TraesCS4D02G068200.2	7.59326	0.00293869	protein WRKY1-like isoform
Up-regulated	1	L. rigidum	Undisturbed	TraesCS5A02G421600.1	7.58932	0.00275122	probable methyltransferase PMT2
Up-regulated	1	L. rigidum	Undisturbed	TraesCS2A02G202800.2	7.58932	0.00275122	unnamed protein product
Up-regulated	1	L. rigidum	Undisturbed	TraesCS5B02G246800.1	7.58372	0.00556554	protein SCAI homolog
Up-regulated	1	L. rigidum	Undisturbed	TraesCS2D02G148400.2	7.58143	0.00259861	stomatal closure-related actin-binding protein 1-like
Up-regulated	1	L. rigidum	Undisturbed	TraesCS5D02G432200.1	7.56663	0.0109637	uncharacterized protein LOC109732562
Up-regulated	1	L. rigidum	Undisturbed	TraesCS3A02G253600.1	7.5655	0.00358501	Chloride channel protein [Source:UniProtKB/TrEMBL;Acc:A0A341RW48]
Up-regulated	1	L. rigidum	Undisturbed	TraesCS2D02G473400.1	7.55542	0.002862	putative disease resistance protein RGA1
Up-regulated	1	L. rigidum	Undisturbed	TraesCS7B02G254000.1	7.55362	0.00563992	GTP-binding nuclear protein [Source:UniProtKB/TrEMBL;Acc:A0A341YHA3]
Up-regulated	1	L. rigidum	Undisturbed	TraesCS3A02G394400.1	7.5532	0.00562851	GDP-L-galactose phosphorylase 1-like
Up-regulated	1	L. rigidum	Undisturbed	TraesCS3B02G112600.4	7.5514	0.00286225	unnamed protein product
Up-regulated	1	L. rigidum	Undisturbed	TraesCS4B02G145600.4	7.54901	0.00682614	U2 snRNP auxiliary factor large subunit [Source:UniProtKB/TrEMBL;Acc:A0A341U5B5]
Up-regulated	1	L. rigidum	Undisturbed	TraesCS3D02G146700.1	7.54737	0.00293869	uncharacterized aarF domain-containing protein kinase 1
Up-regulated	1	L. rigidum	Undisturbed	TraesCS1B02G146900.2	7.54477	0.00902184	Lysine-specific demethylase 5A
Up-regulated	1	L. rigidum	Undisturbed	TraesCS1B02G159600.1	7.54477	0.00902184	unnamed protein product
Up-regulated	1	L. rigidum	Undisturbed	TraesCS7B02G393800.2	7.5412	0.00395186	putative clathrin assembly protein At5g57200
Up-regulated	1	L. rigidum	Undisturbed	TraesCS2A02G255700.2	7.54049	0.0110836	unnamed protein product
Up-regulated	1	L. rigidum	Undisturbed	TraesCS6A02G200200.4	7.53923	0.00376693	probable serine/threonine-protein kinase DDB_G0276461
Up-regulated	1	L. rigidum	Undisturbed	TraesCS4B02G145500.2	7.53512	0.00423821	unnamed protein product
Up-regulated	1	L. rigidum	Undisturbed	TraesCS1B02G301500.2	7.53142	0.00832268	putative serine/threonine-protein kinase B0495.2
Up-regulated	1	L. rigidum	Undisturbed	TraesCS4A02G140600.1	7.53096	0.00488688	Zinc finger protein CONSTANS-LIKE 13
Up-regulated	1	L. rigidum	Undisturbed	TraesCS5A02G149400.1	7.52714	0.00685441	double-stranded RNA-binding protein 8-like
Up-regulated	1	L. rigidum	Undisturbed	TraesCS1B02G431800.5	7.52676	0.00576892	protein BTR1
Up-regulated	1	L. rigidum	Undisturbed	TraesCS5B02G054200.2	7.52073	0.00319638	NAC transcription factor 6A [Source:UniProtKB/TrEMBL;Acc:A0A088AX61]
Up-regulated	1	L. rigidum	Undisturbed	TraesCS3B02G212900.5	7.51193	1.68803e-08	respiratory burst oxidase homolog protein B-like
Up-regulated	1	L. rigidum	Undisturbed	TraesCS2D02G458600.1	7.51026	0.00414997	ubiquitin
Up-regulated	1	L. rigidum	Undisturbed	TraesCS5B02G029000.1	7.50609	0.00379919	K(+) efflux antiporter 3, chloroplastic
Up-regulated	1	L. rigidum	Undisturbed	TraesCS1D02G405800.6	7.50408	0.005089	E3 ubiquitin-protein ligase MBR2-like
Up-regulated	1	L. rigidum	Undisturbed	TraesCS1B02G107300.1	7.50192	0.00358679	tryptamine hydroxycinnamoyltransferase 2-like
Up-regulated	1	L. rigidum	Undisturbed	TraesCS7A02G495600.2	7.50018	0.00839344	uncharacterized protein LOC109773165
Up-regulated	1	L. rigidum	Undisturbed	TraesCS3A02G224000.2	7.49359	0.00350371	factor of DNA methylation 1-like
Up-regulated	1	L. rigidum	Undisturbed	TraesCS1D02G163300.2	7.4915	0.00586354	SET and MYND domain-containing protein 4
Up-regulated	1	L. rigidum	Undisturbed	TraesCS1B02G280900.3	7.48673	0.0107481	embryogenesis-associated protein EMB8-like
Up-regulated	1	L. rigidum	Undisturbed	TraesCS1B02G169400.5	7.47441	0.00405085	WD repeat-containing protein 91 homolog
Up-regulated	1	L. rigidum	Undisturbed	TraesCS6A02G269100.1	7.47236	0.00612321	Ubiquinol oxidase [Source:UniProtKB/TrEMBL;Acc:A0A1D6A6H8]
Up-regulated	1	L. rigidum	Undisturbed	TraesCS7A02G258600.2	7.46825	0.00849995	predicted protein
Up-regulated	1	L. rigidum	Undisturbed	TraesCS2B02G429200.2	7.46825	0.00849995	probable copper-transporting ATPase HMA5
Up-regulated	1	L. rigidum	Undisturbed	TraesCS4B02G156400.1	7.46167	0.00393657	unnamed protein product
Up-regulated	1	L. rigidum	Undisturbed	TraesCS3D02G452100.2	7.45907	0.0109209	glutathione transferase GST 23-like
Up-regulated	1	L. rigidum	Undisturbed	TraesCS2B02G575300.2	7.45505	0.00525492	unnamed protein product
Up-regulated	1	L. rigidum	Undisturbed	TraesCS6B02G230700.1	7.45069	0.00466845	uncharacterized zinc finger protein At4g06634
Up-regulated	1	L. rigidum	Undisturbed	TraesCS3A02G033400.7	7.44636	0.00425171	LEAF RUST 10 DISEASE-RESISTANCE LOCUS RECEPTOR-LIKE PROTEIN KINASE-like 1.2
Up-regulated	1	L. rigidum	Undisturbed	TraesCS5A02G510300.2	7.43771	0.00426416	Mechanosensitive ion channel protein [Source:UniProtKB/TrEMBL;Acc:A0A1D5YF68]
Up-regulated	1	L. rigidum	Undisturbed	TraesCS2B02G320800.1	7.43529	2.0669e-06	DExH-box ATP-dependent RNA helicase DExH7, chloroplastic-like
Up-regulated	1	L. rigidum	Undisturbed	TraesCS7B02G406700.1	7.43111	0.00723236	disease resistance protein RPM1-like
Up-regulated	1	L. rigidum	Undisturbed	TraesCS7B02G269000.3	7.43086	0.0110889	cell division cycle and apoptosis regulator protein 1-like
Up-regulated	1	L. rigidum	Undisturbed	TraesCS5A02G105900.1	7.42187	2.48587e-08	ubiquitin carboxyl-terminal hydrolase 12-like
Up-regulated	1	L. rigidum	Undisturbed	TraesCS6D02G273800.1	7.42025	0.0053867	uncharacterized protein LOC109766100
Up-regulated	1	L. rigidum	Undisturbed	TraesCS3A02G262100.3	7.41579	0.00609665	LEAF RUST 10 DISEASE-RESISTANCE LOCUS RECEPTOR-LIKE PROTEIN KINASE-like 1.2
Up-regulated	1	L. rigidum	Undisturbed	TraesCS5B02G096100.2	7.41333	0.00455587	protein DEHYDRATION-INDUCED 19 homolog 4-like
Up-regulated	1	L. rigidum	Undisturbed	TraesCS3B02G434600.2	7.41333	0.00455587	TPR repeat-containing protein ZIP4
Up-regulated	1	L. rigidum	Undisturbed	TraesCS4B02G235100.3	7.40892	0.004786	Inositol-tetrakisphosphate 1-kinase [Source:UniProtKB/TrEMBL;Acc:A0A341U938]
Up-regulated	1	L. rigidum	Undisturbed	TraesCS2D02G232600.2	7.40686	0.0105939	filament-like plant protein 3
Up-regulated	1	L. rigidum	Undisturbed	TraesCS2A02G592500.2	7.40224	0.00885266	HBS1-like protein
Up-regulated	1	L. rigidum	Undisturbed	TraesCS1D02G124100.1	7.40224	0.00885266	tRNA pseudouridine synthase [Source:UniProtKB/TrEMBL;Acc:A0A341PII1]
Up-regulated	1	L. rigidum	Undisturbed	TraesCS3A02G123100.6	7.39765	0.00747262	unnamed protein product
Up-regulated	1	L. rigidum	Undisturbed	TraesCS4A02G249200.2	7.39309	0.0064663	E3 ubiquitin-protein ligase MIEL1-like
Up-regulated	1	L. rigidum	Undisturbed	TraesCS5A02G491500.3	7.39309	0.0064663	myosin heavy chain, embryonic smooth muscle isoform
Up-regulated	1	L. rigidum	Undisturbed	TraesCS7D02G150200.2	7.38205	0.00747262	receptor-like protein kinase
Up-regulated	1	L. rigidum	Undisturbed	TraesCS7B02G341200.2	7.37505	0.00479954	Glutathione synthetase [Source:UniProtKB/TrEMBL;Acc:A0A341YI80]
Up-regulated	1	L. rigidum	Undisturbed	TraesCS2B02G304400.1	7.36808	0.00906789	trihelix transcription factor ASR3-like
Up-regulated	1	L. rigidum	Undisturbed	TraesCS2B02G137400.4	7.35687	0.00677738	DNA polymerase [Source:UniProtKB/TrEMBL;Acc:A0A1D5UCC0]
Up-regulated	1	L. rigidum	Undisturbed	TraesCS3A02G069900.2	7.35415	0.00605114	Chromatin-remodeling complex ATPase [Source:UniProtKB/TrEMBL;Acc:A0A341RNQ1]
Up-regulated	1	L. rigidum	Undisturbed	TraesCS7D02G374500.1	7.34955	0.00562851	uncharacterized protein LOC109752730
Up-regulated	1	L. rigidum	Undisturbed	TraesCS7D02G391600.1	7.3475	0.00925921	histone-lysine N-methyltransferase ATXR4
Up-regulated	1	L. rigidum	Undisturbed	TraesCS7A02G295800.4	7.34273	0.011078	Structural maintenance of chromosomes protein [Source:UniProtKB/TrEMBL;Acc:A0A341Y7B0]
Up-regulated	1	L. rigidum	Undisturbed	TraesCS5B02G213400.1	7.33577	0.00605114	uncharacterized protein LOC109784816
Up-regulated	1	L. rigidum	Undisturbed	TraesCS6A02G230000.2	7.33311	0.00936193	unnamed protein product
Up-regulated	1	L. rigidum	Undisturbed	TraesCS5A02G040500.1	7.33311	0.00936193	unnamed protein product
Up-regulated	1	L. rigidum	Undisturbed	TraesCS2B02G242100.2	7.31694	0.00961708	cysteine-rich receptor-like protein kinase 6
Up-regulated	1	L. rigidum	Undisturbed	TraesCS5A02G411900.1	7.31694	0.00961708	transcription factor JUNGBRUNNEN 1-like
Up-regulated	1	L. rigidum	Undisturbed	TraesCS5B02G014500.1	7.31423	0.00608793	haloacid dehalogenase-like hydrolase domain-containing protein At3g48420
Up-regulated	1	L. rigidum	Undisturbed	TraesCS3B02G189700.2	7.30485	0.00603176	KH domain-containing protein HEN4-like
Up-regulated	1	L. rigidum	Undisturbed	TraesCS5A02G307300.3	7.30485	0.00603176	unnamed protein product
Up-regulated	1	L. rigidum	Undisturbed	TraesCS1A02G038400.2	7.28762	0.00759264	Poly [ADP-ribose] polymerase
Up-regulated	1	L. rigidum	Undisturbed	TraesCS7A02G465500.3	7.28571	0.0100316	glycine-rich domain-containing protein 2-like
Up-regulated	1	L. rigidum	Undisturbed	TraesCS2D02G117800.3	7.27804	0.00674262	DNA polymerase zeta catalytic subunit
Up-regulated	1	L. rigidum	Undisturbed	TraesCS3A02G148800.5	7.27804	0.00674262	unnamed protein product
Up-regulated	1	L. rigidum	Undisturbed	TraesCS3A02G347000.1	7.26845	0.00691424	skin secretory protein xP2-like
Up-regulated	1	L. rigidum	Undisturbed	TraesCS5B02G243100.2	7.26554	0.0107416	Carbonic anhydrase [Source:UniProtKB/TrEMBL;Acc:A0A341VDR1]
Up-regulated	1	L. rigidum	Undisturbed	TraesCS7D02G060600.2	7.25377	0.010507	probable aminotransferase ACS12
Up-regulated	1	L. rigidum	Undisturbed	TraesCS2D02G589400.1	7.25377	0.010507	probable glutathione S-transferase
Up-regulated	1	L. rigidum	Undisturbed	TraesCS7B02G262700.1	7.24876	0.0123259	cysteine-rich and transmembrane domain-containing protein A-like
Up-regulated	1	L. rigidum	Undisturbed	TraesCS3B02G037000.1	7.22798	0.0110401	Bowman-Birk type trypsin inhibitor
Up-regulated	1	L. rigidum	Undisturbed	TraesCS6A02G122200.1	7.22291	0.00967002	probable LRR receptor-like serine/threonine-protein kinase At1g05700
Up-regulated	1	L. rigidum	Undisturbed	TraesCS4D02G045500.3	7.22291	0.00967002	probable serine/threonine protein kinase IREH1
Up-regulated	1	L. rigidum	Undisturbed	TraesCS1D02G302200.2	7.2211	0.0100796	KH domain-containing protein SPIN1-like
Up-regulated	1	L. rigidum	Undisturbed	TraesCS6B02G013700.12	7.2211	0.0100796	uncharacterized protein LOC109731434
Up-regulated	1	L. rigidum	Undisturbed	TraesCS1D02G269200.5	7.2211	0.0100796	uncharacterized protein LOC109736411
Up-regulated	1	L. rigidum	Undisturbed	TraesCS7B02G208900.2	7.216	0.0128486	E3 ubiquitin-protein ligase RGLG4
Up-regulated	1	L. rigidum	Undisturbed	TraesCS7D02G219800.2	7.21286	0.00885369	uncharacterized membrane protein At1g06890-like
Up-regulated	1	L. rigidum	Undisturbed	TraesCS2D02G289900.2	7.18427	0.0102386	Arogenate dehydratase [Source:UniProtKB/TrEMBL;Acc:A0A1D5ULN6]
Up-regulated	1	L. rigidum	Undisturbed	TraesCS1B02G224600.3	7.17913	0.0103055	Flavin-containing monooxygenase [Source:UniProtKB/TrEMBL;Acc:A0A341P5M6]
Up-regulated	1	L. rigidum	Undisturbed	TraesCS1D02G372200.3	7.17913	0.0103055	phosphatidylinositol/phosphatidylcholine transfer protein SFH8-like
Up-regulated	1	L. rigidum	Undisturbed	TraesCS5B02G494600.1	7.14986	0.0121519	NAD-dependent epimerase/dehydratase
Up-regulated	1	L. rigidum	Undisturbed	TraesCS6B02G433600.1	7.14812	0.0129178	cytokinesis protein sepA-like
Up-regulated	1	L. rigidum	Undisturbed	TraesCS2B02G613300.1	7.14812	0.0129178	flavanone 3-hydroxylase
Up-regulated	1	L. rigidum	Undisturbed	TraesCS2D02G274000.1	7.14458	0.0108604	sister chromatid cohesion protein SCC4
Up-regulated	1	L. rigidum	Undisturbed	TraesCS5B02G294400.1	7.1341	0.0107481	beta-glucosidase 31-like isoform
Up-regulated	1	L. rigidum	Undisturbed	TraesCS4B02G269300.2	7.1341	0.0107481	unnamed protein product
Up-regulated	1	L. rigidum	Undisturbed	TraesCS3B02G164700.1	7.12886	0.0107545	E3 ubiquitin-protein ligase ATL41-like
Up-regulated	1	L. rigidum	Undisturbed	TraesCS3B02G094400.3	7.12886	0.0107545	large proline-rich protein bag6
Up-regulated	1	L. rigidum	Undisturbed	TraesCS5A02G433600.1	7.1236	0.0111428	mannose/glucose-specific lectin
Up-regulated	1	L. rigidum	Undisturbed	TraesCS5B02G549800.2	7.1236	0.0111428	RPM1-interacting protein 4-like
Up-regulated	1	L. rigidum	Undisturbed	TraesCS3B02G403200.1	7.11829	0.0121873	DNA excision repair protein ERCC-8-like
Up-regulated	1	L. rigidum	Undisturbed	TraesCS3B02G538800.1	7.11829	0.0121873	glutathione S-transferase U8-like
Up-regulated	1	L. rigidum	Undisturbed	TraesCS6B02G190600.2	7.11291	0.0137879	ADP-ribosylation factor GTPase-activating protein AGD12-like
Up-regulated	1	L. rigidum	Undisturbed	TraesCS3A02G012600.1	7.11291	0.0137879	Germin-like protein 12-2
Up-regulated	1	L. rigidum	Undisturbed	TraesCS1A02G183900.2	7.11291	0.0137879	Non-lysosomal glucosylceramidase [Source:UniProtKB/TrEMBL;Acc:A0A1D5RQI7]
Up-regulated	1	L. rigidum	Undisturbed	TraesCS3D02G233900.2	7.11186	4.62152e-06	carbon catabolite repressor protein 4 homolog 6-like
Up-regulated	1	L. rigidum	Undisturbed	TraesCS3B02G228800.1	7.09843	0.0110142	unnamed protein product
Up-regulated	1	L. rigidum	Undisturbed	TraesCS3D02G484600.1	7.09308	0.0120847	CML79 [Source:UniProtKB/TrEMBL;Acc:A0A192ADG2]
Up-regulated	1	L. rigidum	Undisturbed	TraesCS2A02G111900.1	7.0877	0.0123382	F-box protein related to abiotic stress 2
Up-regulated	1	L. rigidum	Undisturbed	TraesCS2A02G360300.4	7.0877	0.0123382	probable leucine-rich repeat receptor-like protein kinase At5g63930
Up-regulated	1	L. rigidum	Undisturbed	TraesCS2D02G029600.1	7.08228	0.0132065	syn-copalyl diphosphate synthase-like
Up-regulated	1	L. rigidum	Undisturbed	TraesCS2B02G607200.3	7.06736	0.0138264	probable LRR receptor-like serine/threonine-protein kinase At1g63430
Up-regulated	1	L. rigidum	Undisturbed	TraesCS5D02G506800.3	7.06736	0.0138264	unnamed protein product
Up-regulated	1	L. rigidum	Undisturbed	TraesCS7A02G341100.1	7.06186	0.0127329	protein tesmin/TSO1-like CXC 5
Up-regulated	1	L. rigidum	Undisturbed	TraesCS2A02G516500.1	7.05637	0.0122894	aromatic-L-amino-acid decarboxylase-like
Up-regulated	1	L. rigidum	Undisturbed	TraesCS7A02G218500.3	7.05087	0.0123295	C2 and GRAM domain-containing protein At1g03370
Up-regulated	1	L. rigidum	Undisturbed	TraesCS5B02G245000.2	7.05087	0.0123295	purine permease 3-like
Up-regulated	1	L. rigidum	Undisturbed	TraesCS4A02G139300.2	7.04534	0.0145447	lysine-specific demethylase JMJ25
Up-regulated	1	L. rigidum	Undisturbed	TraesCS5A02G122200.2	7.04534	0.0145447	nucleolar protein 6
Up-regulated	1	L. rigidum	Undisturbed	TraesCS3A02G117800.2	7.03976	0.0160168	MAR-binding filament-like protein 1
Up-regulated	1	L. rigidum	Undisturbed	TraesCS6B02G421000.1	7.02432	0.0150299	translation initiation factor eIF-2B subunit epsilon-like
Up-regulated	1	L. rigidum	Undisturbed	TraesCS7D02G114400.1	7.01868	0.0141663	uncharacterized protein LOC109768945
Up-regulated	1	L. rigidum	Undisturbed	TraesCS3B02G302600.3	7.01305	0.0139324	RNA polymerase III subunit RPC82 domain containing protein, expressed [Source:UniProtKB/TrEMBL;Acc:D8L9P3]
Up-regulated	1	L. rigidum	Undisturbed	TraesCS4B02G101000.1	7.0017	0.0174949	unnamed protein product
Up-regulated	1	L. rigidum	Undisturbed	TraesCS1D02G241700.1	6.97421	0.0160075	unnamed protein product
Up-regulated	1	L. rigidum	Undisturbed	TraesCSU02G204600.1	6.93427	0.0186395	uncharacterized protein LOC109749044
Up-regulated	1	L. rigidum	Undisturbed	TraesCS2B02G064900.1	6.92238	0.0190936	unnamed protein product
Up-regulated	1	L. rigidum	Undisturbed	TraesCS3A02G232400.1	6.92238	0.0190936	unnamed protein product
Up-regulated	1	L. rigidum	Undisturbed	TraesCS4D02G062100.2	6.88709	0.0212875	BEL1-like homeodomain protein 4
Up-regulated	1	L. rigidum	Undisturbed	TraesCS5A02G514500.1	6.88709	0.0212875	probable receptor-like protein kinase At5g24010
Up-regulated	1	L. rigidum	Undisturbed	TraesCS5B02G416900.4	6.88709	0.0212875	unnamed protein product
Up-regulated	1	L. rigidum	Undisturbed	TraesCS2A02G211700.3	6.88099	0.0215657	unnamed protein product
Up-regulated	1	L. rigidum	Undisturbed	TraesCS2B02G356400.1	6.88099	0.0215657	unnamed protein product
Up-regulated	1	L. rigidum	Undisturbed	TraesCS5B02G413900.2	6.84841	4.37734e-13	glutamic acid-rich protein
Up-regulated	1	L. rigidum	Undisturbed	TraesCS5B02G121400.3	6.83834	0.0246254	2-oxoisovalerate dehydrogenase subunit alpha 2, mitochondrial-like
Up-regulated	1	L. rigidum	Undisturbed	TraesCS6B02G035100.1	6.83834	0.0246254	Disease resistance protein RPM1
Up-regulated	1	L. rigidum	Undisturbed	TraesCS7D02G444800.3	6.83834	0.0246254	DNA repair protein RAD51 homolog 4
Up-regulated	1	L. rigidum	Undisturbed	TraesCS2A02G307100.3	6.83834	0.0246254	mitogen-activated protein kinase kinase kinase 3-like
Up-regulated	1	L. rigidum	Undisturbed	TraesCS2D02G079600.1	6.83834	0.0246254	two-component response regulator-like PRR37
Up-regulated	1	L. rigidum	Undisturbed	TraesCS6D02G213500.1	6.81364	5.19282e-05	uncharacterized protein LOC109766483
Up-regulated	1	L. rigidum	Undisturbed	TraesCS3D02G543500.1	6.6383	0.000213613	protein IQ-DOMAIN 1-like
Up-regulated	1	L. rigidum	Undisturbed	TraesCS4B02G182200.1	6.59824	0.000239091	FIP1[III]-like protein
Up-regulated	1	L. rigidum	Undisturbed	TraesCS5A02G249100.2	6.57151	9.43752e-05	protein SCAI homolog
Up-regulated	1	L. rigidum	Undisturbed	TraesCS7A02G296900.6	6.53286	0.000212574	helicase-like transcription factor CHR28
Up-regulated	1	L. rigidum	Undisturbed	TraesCS6D02G009900.1	6.51319	8.84223e-05	WAT1-related protein [Source:UniProtKB/TrEMBL;Acc:W5H224]
Up-regulated	1	L. rigidum	Undisturbed	TraesCS4D02G072400.2	6.50056	0.000332934	plant UBX domain-containing protein 11
Up-regulated	1	L. rigidum	Undisturbed	TraesCS7D02G460500.1	6.43748	3.15587e-05	germin-like protein 8-11
Up-regulated	1	L. rigidum	Undisturbed	TraesCS3B02G208200.3	6.41965	0.000296555	unnamed protein product
Up-regulated	1	L. rigidum	Undisturbed	TraesCS4A02G407100.1	6.38204	6.12255e-06	calmodulin-binding transcription activator 3-like
Up-regulated	1	L. rigidum	Undisturbed	TraesCS4A02G349300.1	6.34547	0.00111631	BTB/POZ domain-containing protein At2g13690
Up-regulated	1	L. rigidum	Undisturbed	TraesCS4B02G020000.2	6.3312	0.000370409	Aminopeptidase [Source:UniProtKB/TrEMBL;Acc:A0A341TWU3]
Up-regulated	1	L. rigidum	Undisturbed	TraesCS4D02G339300.1	6.31791	0.00162117	uncharacterized protein LOC109768161
Up-regulated	1	L. rigidum	Undisturbed	TraesCS7A02G041200.1	6.24879	0.00021753	flavonoid 3',5'-hydroxylase-like
Up-regulated	1	L. rigidum	Undisturbed	TraesCS2D02G459200.1	6.21692	0.00181181	ubiquitin-like
Up-regulated	1	L. rigidum	Undisturbed	TraesCS2D02G589300.1	6.1303	0.0013614	glutathione S-transferase U22-like
Up-regulated	1	L. rigidum	Undisturbed	TraesCS3D02G248700.1	6.06432	3.90279e-05	myosin-17-like
Up-regulated	1	L. rigidum	Undisturbed	TraesCS4A02G210200.1	6.05063	8.309e-05	unnamed protein product
Up-regulated	1	L. rigidum	Undisturbed	TraesCS1D02G341000.4	6.00126	0.000357906	homeobox protein HOX1A-like
Up-regulated	1	L. rigidum	Undisturbed	TraesCS3D02G313600.3	5.88919	0.000847759	helicase-like transcription factor CHR28
Up-regulated	1	L. rigidum	Undisturbed	TraesCS3D02G285700.1	5.7762	8.2017e-05	Malic enzyme [Source:UniProtKB/TrEMBL;Acc:A0A1D5WEU7]
Up-regulated	1	L. rigidum	Undisturbed	TraesCS3A02G452600.1	5.74168	0.000250291	Laccase [Source:UniProtKB/TrEMBL;Acc:A0A1D5VEE6]
Up-regulated	1	L. rigidum	Undisturbed	TraesCS2A02G578300.1	5.72343	1.95966e-06	putative glutathione S-transferase
Up-regulated	1	L. rigidum	Undisturbed	TraesCS3A02G415400.1	5.71428	0.00189009	endoribonuclease Dicer homolog 3a
Up-regulated	1	L. rigidum	Undisturbed	TraesCS7B02G262300.1	5.65522	0.00833757	cysteine-rich and transmembrane domain-containing protein B-like
Up-regulated	1	L. rigidum	Undisturbed	TraesCS1D02G088300.2	5.65363	0.00500514	putative membrane-bound O-acyltransferase C24H6.01c
Up-regulated	1	L. rigidum	Undisturbed	TraesCS3A02G452400.1	5.63147	0.00468169	Laccase [Source:UniProtKB/TrEMBL;Acc:A0A1D5V694]
Up-regulated	1	L. rigidum	Undisturbed	TraesCS4B02G109700.1	5.5926	3.43309e-09	unnamed protein product
Up-regulated	1	L. rigidum	Undisturbed	TraesCS4A02G435300.1	5.57571	0.00595729	putative glutathione S-transferase GSTU6
Up-regulated	1	L. rigidum	Undisturbed	TraesCS6A02G203800.1	5.57444	0.00576892	unnamed protein product
Up-regulated	1	L. rigidum	Undisturbed	TraesCS1B02G049300.4	5.56118	4.71223e-05	Poly [ADP-ribose] polymerase [Source:UniProtKB/TrEMBL;Acc:W5A9W9]
Up-regulated	1	L. rigidum	Undisturbed	TraesCS3B02G093100.2	5.5462	0.00109416	ricin B-like lectin R40G3
Up-regulated	1	L. rigidum	Undisturbed	TraesCS2D02G362700.1	5.51836	6.0274e-05	endoribonuclease Dicer homolog 4 i
Up-regulated	1	L. rigidum	Undisturbed	TraesCS2B02G240800.3	5.46889	0.0103348	cysteine-rich receptor kinase
Up-regulated	1	L. rigidum	Undisturbed	TraesCS2B02G099700.1	5.45616	3.57068e-06	uncharacterized protein LOC109776463
Up-regulated	1	L. rigidum	Undisturbed	TraesCS3D02G010700.1	5.43932	0.0165713	uncharacterized protein LOC109768588
Up-regulated	1	L. rigidum	Undisturbed	TraesCS2B02G403000.1	5.36686	0.0117841	beta-fructofuranosidase 1-like
Up-regulated	1	L. rigidum	Undisturbed	TraesCS7B02G050100.2	5.31623	0.00902184	CHD3-type chromatin-remodeling factor PICKLE
Up-regulated	1	L. rigidum	Undisturbed	TraesCS3B02G592100.1	5.29036	0.0212875	probable histone acetyltransferase HAC-like 3
Up-regulated	1	L. rigidum	Undisturbed	TraesCS3D02G514400.1	5.27677	5.81023e-05	3-oxo-Delta(4,5)-steroid 5-beta-reductase-like
Up-regulated	1	L. rigidum	Undisturbed	TraesCS7B02G187600.2	5.21896	0.0107444	NAC domain-containing protein 14
Up-regulated	1	L. rigidum	Undisturbed	TraesCS3A02G253500.1	5.18352	0.022802	sinapine esterase-like
Up-regulated	1	L. rigidum	Undisturbed	TraesCS6B02G074200.1	5.14463	0.0169565	laccase-15
Up-regulated	1	L. rigidum	Undisturbed	TraesCS1A02G043900.1	5.10679	0.021889	Laccase [Source:UniProtKB/TrEMBL;Acc:W4ZVY0]
Up-regulated	1	L. rigidum	Undisturbed	TraesCS3D02G165400.1	5.05909	0.0386145	nascent polypeptide-associated complex subunit alpha, muscle-specific form-like
Up-regulated	1	L. rigidum	Undisturbed	TraesCS7D02G368700.1	5.01521	0.0348449	berberine bridge enzyme-like 27
Up-regulated	1	L. rigidum	Undisturbed	TraesCS6B02G362000.1	5.00453	0.0227997	Glycosyltransferase [Source:UniProtKB/TrEMBL;Acc:A0A1D6AKD2]
Up-regulated	1	L. rigidum	Undisturbed	TraesCS5A02G339200.1	4.99787	0.049134	ankyrin repeat-containing protein At2g01680-like
Up-regulated	1	L. rigidum	Undisturbed	TraesCS3B02G272400.2	4.99214	0.0396062	probable E3 ubiquitin-protein ligase HIP1
Up-regulated	1	L. rigidum	Undisturbed	TraesCS1B02G193700.1	4.92998	0.000587682	protein RRC1-like
Up-regulated	1	L. rigidum	Undisturbed	TraesCS7A02G473400.1	4.91006	4.38223e-05	Germin-like protein 8-9
Up-regulated	1	L. rigidum	Undisturbed	TraesCS2A02G404000.1	4.85653	0.0112198	unnamed protein product
Up-regulated	1	L. rigidum	Undisturbed	TraesCS4D02G363400.1	4.82364	0.0265571	uncharacterized protein LOC109771760
Up-regulated	1	L. rigidum	Undisturbed	TraesCS5D02G550800.1	4.80554	0.0452051	putative disease resistance RPP13-like protein 3
Up-regulated	1	L. rigidum	Undisturbed	TraesCS3B02G603400.3	4.80458	0.00393657	E3 SUMO-protein ligase SIZ1-like
Up-regulated	1	L. rigidum	Undisturbed	TraesCS6D02G144400.1	4.80155	0.0116826	basic leucine zipper 63-like
Up-regulated	1	L. rigidum	Undisturbed	TraesCS1A02G017300.1	4.79849	2.54157e-05	putative glutathione S-transferase GSTU6
Up-regulated	1	L. rigidum	Undisturbed	TraesCS7D02G152000.1	4.73857	0.00927644	hydroxycinnamoyltransferase 4-like
Up-regulated	1	L. rigidum	Undisturbed	TraesCS1B02G355900.1	4.71003	0.00268988	short-chain type dehydrogenase/reductase-like
Up-regulated	1	L. rigidum	Undisturbed	TraesCS1A02G097500.2	4.68384	0.00927644	heparan-alpha-glucosaminide N-acetyltransferase-like
Up-regulated	1	L. rigidum	Undisturbed	TraesCS1D02G044300.1	4.67458	0.000149618	Laccase [Source:UniProtKB/TrEMBL;Acc:W5ANU7]
Up-regulated	1	L. rigidum	Undisturbed	TraesCS7B02G150400.2	4.67235	0.017367	uncharacterized protein LOC109742499
Up-regulated	1	L. rigidum	Undisturbed	TraesCS3D02G253500.1	4.60736	0.0198042	uncharacterized protein LOC109732770
Up-regulated	1	L. rigidum	Undisturbed	TraesCS7D02G039600.2	4.59187	0.00395186	haloacid dehalogenase-like hydrolase domain-containing protein 3
Up-regulated	1	L. rigidum	Undisturbed	TraesCS2A02G141700.1	4.59085	0.0330726	uncharacterized protein LOC109731846
Up-regulated	1	L. rigidum	Undisturbed	TraesCS5A02G251800.1	4.54403	0.0326965	dof zinc finger protein MNB1A-like
Up-regulated	1	L. rigidum	Undisturbed	TraesCS5A02G035300.1	4.49445	0.0404162	wall-associated receptor kinase 5-like
Up-regulated	1	L. rigidum	Undisturbed	TraesCS1B02G348000.1	4.47359	0.0202852	O-methyltransferase ZRP4-like
Up-regulated	1	L. rigidum	Undisturbed	TraesCS6A02G058300.1	4.45708	5.87866e-07	laccase-15-like
Up-regulated	1	L. rigidum	Undisturbed	TraesCS5A02G242000.1	4.42495	0.0301412	tuliposide A-converting enzyme b1, amyloplastic-like
Up-regulated	1	L. rigidum	Undisturbed	TraesCS2D02G420900.1	4.39113	0.0495226	pathogenesis-related protein 1-like
Up-regulated	1	L. rigidum	Undisturbed	TraesCS4D02G147700.6	4.34458	0.00941635	sister-chromatid cohesion protein 3
Up-regulated	1	L. rigidum	Undisturbed	TraesCSU02G184900.1	4.29699	0.0162306	putative glutathione S-transferase GSTU6
Up-regulated	1	L. rigidum	Undisturbed	TraesCSU02G183000.1	4.29699	0.0162306	putative glutathione S-transferase GSTU6
Up-regulated	1	L. rigidum	Undisturbed	TraesCS3A02G138400.1	4.25931	0.00520354	Subtilisin-like protease
Up-regulated	1	L. rigidum	Undisturbed	TraesCS3D02G361200.1	4.2076	0.00225247	cytochrome P450 86A1
Up-regulated	1	L. rigidum	Undisturbed	TraesCS2B02G609500.1	4.20704	2.07756e-06	putative glutathione S-transferase
Up-regulated	1	L. rigidum	Undisturbed	TraesCS7A02G084800.1	4.17031	0.0190561	probable O-methyltransferase 2
Up-regulated	1	L. rigidum	Undisturbed	TraesCS4B02G103000.2	4.16787	0.0375833	probable monogalactosyldiacylglycerol synthase 2, chloroplastic
Up-regulated	1	L. rigidum	Undisturbed	TraesCS2A02G152200.1	4.16373	0.00155454	cytochrome P450 CYP709C1
Up-regulated	1	L. rigidum	Undisturbed	TraesCS6B02G258400.2	4.13975	3.48708e-05	Phenylalanine ammonia-lyase [Source:UniProtKB/TrEMBL;Acc:A0A341X183]
Up-regulated	1	L. rigidum	Undisturbed	TraesCS7D02G059000.1	4.1301	0.0261129	cytochrome P450 704C1
Up-regulated	1	L. rigidum	Undisturbed	TraesCS3D02G102200.1	4.09249	0.000487071	Glycosyltransferase [Source:UniProtKB/TrEMBL;Acc:A0A1D5WWD7]
Up-regulated	1	L. rigidum	Undisturbed	TraesCS5B02G221600.3	4.079	7.80677e-10	Cellulose synthase
Up-regulated	1	L. rigidum	Undisturbed	TraesCS3D02G001400.1	4.04965	0.0104199	UDP-glycosyltransferase 72B3-like
Up-regulated	1	L. rigidum	Undisturbed	TraesCS4B02G036800.3	4.04215	0.0328874	shikimate kinase-like protein
Up-regulated	1	L. rigidum	Undisturbed	TraesCS1D02G014500.1	3.969	0.0131163	probable glutathione S-transferase GSTU6
Up-regulated	1	L. rigidum	Undisturbed	TraesCS3A02G459500.1	3.93278	0.0399765	glutathione transferase GST 23-like
Up-regulated	1	L. rigidum	Undisturbed	TraesCS5D02G455900.1	3.79914	0.0119783	AAA-ATPase At3g28510-like
Up-regulated	1	L. rigidum	Undisturbed	TraesCS5D02G389200.2	3.7659	0.015718	BTB/POZ domain-containing protein At5g66560-like
Up-regulated	1	L. rigidum	Undisturbed	TraesCS3D02G006500.1	3.64593	0.00700291	classical arabinogalactan protein 9-like
Up-regulated	1	L. rigidum	Undisturbed	TraesCS7A02G473600.1	3.63787	0.00494944	Germin-like protein 12-2
Up-regulated	1	L. rigidum	Undisturbed	TraesCS4D02G344300.1	3.63152	0.0210487	probable aquaporin TIP4-1
Up-regulated	1	L. rigidum	Undisturbed	TraesCS5A02G377200.1	3.62107	0.00258226	leucine-rich repeat extensin-like protein 6
Up-regulated	1	L. rigidum	Undisturbed	TraesCS2D02G342600.1	3.60662	0.0126884	unnamed protein product
Up-regulated	1	L. rigidum	Undisturbed	TraesCS2B02G307200.1	3.59553	0.00253074	desiccation-related protein PCC13-62-like
Up-regulated	1	L. rigidum	Undisturbed	TraesCS5D02G054300.1	3.57273	0.000286125	Germin-like protein 8-4
Up-regulated	1	L. rigidum	Undisturbed	TraesCS7B02G252300.2	3.5391	0.0317918	unnamed protein product
Up-regulated	1	L. rigidum	Undisturbed	TraesCS7D02G044500.1	3.53609	7.32456e-05	probable glutathione S-transferase GSTU6
Up-regulated	1	L. rigidum	Undisturbed	TraesCS7A02G168300.1	3.47665	0.000709706	Transcription elongation factor SPT5 [Source:UniProtKB/TrEMBL;Acc:A0A1D6BU62]
Up-regulated	1	L. rigidum	Undisturbed	TraesCS3D02G050200.1	3.46121	0.0241152	protein NtpR-like
Up-regulated	1	L. rigidum	Undisturbed	TraesCS3B02G238500.1	3.45025	0.0404162	IQ domain-containing protein IQM1-like
Up-regulated	1	L. rigidum	Undisturbed	TraesCS1A02G152200.3	3.43589	0.000237915	Non-lysosomal glucosylceramidase [Source:UniProtKB/TrEMBL;Acc:A0A1D5X9X3]
Up-regulated	1	L. rigidum	Undisturbed	TraesCS5B02G502200.1	3.39001	0.00661535	GEM-like protein 5
Up-regulated	1	L. rigidum	Undisturbed	TraesCS5A02G318700.1	3.3485	0.0143971	unnamed protein product
Up-regulated	1	L. rigidum	Undisturbed	TraesCS5A02G485300.1	3.33992	0.0225625	protein NRT1/ PTR FAMILY 5.7-like
Up-regulated	1	L. rigidum	Undisturbed	TraesCS2A02G259000.1	3.33222	0.00602056	probable NAD(P)H dehydrogenase (quinone) FQR1-like 1
Up-regulated	1	L. rigidum	Undisturbed	TraesCS1A02G424100.1	3.32833	0.00504026	berberine bridge enzyme-like 18
Up-regulated	1	L. rigidum	Undisturbed	TraesCS2B02G177300.1	3.31854	0.00185307	cytochrome P450
Up-regulated	1	L. rigidum	Undisturbed	TraesCS4A02G061700.1	3.27857	9.74014e-08	Non-symbiotic hemoglobin
Up-regulated	1	L. rigidum	Undisturbed	TraesCS4A02G441800.1	3.22206	0.0401388	unnamed protein product
Up-regulated	1	L. rigidum	Undisturbed	TraesCS3B02G155900.1	3.18804	0.00395186	Subtilisin-like protease
Up-regulated	1	L. rigidum	Undisturbed	TraesCS6D02G212200.1	3.18308	0.0310097	Phenylalanine ammonia-lyase
Up-regulated	1	L. rigidum	Undisturbed	TraesCS7D02G357400.1	3.16888	0.00894105	cysteine-rich and transmembrane domain-containing protein B-like
Up-regulated	1	L. rigidum	Undisturbed	TraesCS2D02G186900.1	3.15211	0.0399788	uncharacterized protein LOC109772935
Up-regulated	1	L. rigidum	Undisturbed	TraesCS6D02G332700.1	3.14482	0.020106	filaggrin-2-like
Up-regulated	1	L. rigidum	Undisturbed	TraesCS5D02G268800.1	3.13702	5.57313e-05	berberine bridge enzyme-like 18
Up-regulated	1	L. rigidum	Undisturbed	TraesCS2A02G128100.2	3.11267	0.0424181	RNA pseudouridine synthase 6, chloroplastic
Up-regulated	1	L. rigidum	Undisturbed	TraesCS3D02G393200.2	3.09769	0.0182574	calreticulin-3
Up-regulated	1	L. rigidum	Undisturbed	TraesCS5B02G488500.1	3.08002	0.000249619	rRNA N-glycosidase [Source:UniProtKB/TrEMBL;Acc:A0A341VQ24]
Up-regulated	1	L. rigidum	Undisturbed	TraesCS6B02G344100.2	3.0665	6.96695e-10	Peptidylprolyl isomerase [Source:UniProtKB/TrEMBL;Acc:A0A341X1J7]
Up-regulated	1	L. rigidum	Undisturbed	TraesCS5D02G218500.1	3.01826	0.0415534	leucine-rich repeat receptor-like protein kinase PEPR2
Up-regulated	1	L. rigidum	Undisturbed	TraesCS6B02G012100.3	3.01415	0.00691912	ruBisCO large subunit-binding protein subunit beta, chloroplastic-like
Up-regulated	1	L. rigidum	Undisturbed	TraesCS7A02G452100.1	3.00465	0.0012461	unnamed protein product
Up-regulated	1	L. rigidum	Undisturbed	TraesCS2B02G109800.1	2.97603	0.0182574	Hexosyltransferase [Source:UniProtKB/TrEMBL;Acc:W5BND2]
Up-regulated	1	L. rigidum	Undisturbed	TraesCS3D02G055400.1	2.96562	0.034346	sulfoquinovosyl transferase SQD2-like
Up-regulated	1	L. rigidum	Undisturbed	TraesCS1A02G049700.1	2.95965	0.000101478	alternative splicing regulator
Up-regulated	1	L. rigidum	Undisturbed	TraesCS4D02G324800.1	2.95511	0.0193553	respiratory burst oxidase homolog protein B-like
Up-regulated	1	L. rigidum	Undisturbed	TraesCS2A02G068500.1	2.9526	0.0250395	Glycosyltransferase [Source:UniProtKB/TrEMBL;Acc:A0A1D5TL02]
Up-regulated	1	L. rigidum	Undisturbed	TraesCS2A02G179000.1	2.93595	0.014924	hypothetical protein
Up-regulated	1	L. rigidum	Undisturbed	TraesCS3B02G075700.1	2.92733	0.00466089	germin F
Up-regulated	1	L. rigidum	Undisturbed	TraesCS2B02G057100.1	2.89179	0.0459192	cytochrome P450 93A2-like
Up-regulated	1	L. rigidum	Undisturbed	TraesCSU02G007600.1	2.87749	0.0474535	cytochrome P450 71D11-like
Up-regulated	1	L. rigidum	Undisturbed	TraesCS6B02G125800.1	2.83683	0.049855	cytochrome P450 71A1-like
Up-regulated	1	L. rigidum	Undisturbed	TraesCSU02G128500.1	2.73574	0.0326965	germin-like protein 8-11
Up-regulated	1	L. rigidum	Undisturbed	TraesCS1A02G016800.1	2.71697	0.0124852	probable glutathione S-transferase GSTU6
Up-regulated	1	L. rigidum	Undisturbed	TraesCS7D02G441100.1	2.69974	0.00150333	non-specific lipid-transfer protein-like
Up-regulated	1	L. rigidum	Undisturbed	TraesCS2B02G609400.1	2.69869	3.63911e-05	glutathione S-transferase 3-like
Up-regulated	1	L. rigidum	Undisturbed	TraesCS3A02G092800.1	2.6779	0.0242267	galactinol--sucrose galactosyltransferase
Up-regulated	1	L. rigidum	Undisturbed	TraesCS4D02G295400.1	2.66212	0.00702296	probable glutathione S-transferase GSTU6
Up-regulated	1	L. rigidum	Undisturbed	TraesCS1D02G191100.1	2.6503	1.85194e-06	unnamed protein product
Up-regulated	1	L. rigidum	Undisturbed	TraesCS1D02G096200.1	2.62116	0.00242108	Peroxidase [Source:UniProtKB/TrEMBL;Acc:W5AKM7]
Up-regulated	1	L. rigidum	Undisturbed	TraesCS6B02G331300.1	2.6205	0.00382146	probable beta-D-xylosidase 7
Up-regulated	1	L. rigidum	Undisturbed	TraesCS1A02G103900.1	2.57777	0.00551015	receptor-like protein kinase HAIKU2
Up-regulated	1	L. rigidum	Undisturbed	TraesCS7D02G295400.4	2.57719	0.0240081	protein LHY
Up-regulated	1	L. rigidum	Undisturbed	TraesCS2D02G295000.1	2.54909	0.0008888	non-specific lipid-transfer protein 4-like
Up-regulated	1	L. rigidum	Undisturbed	TraesCS4A02G022700.1	2.48482	0.00476428	BEL1-like homeodomain protein 7
Up-regulated	1	L. rigidum	Undisturbed	TraesCS2B02G313300.1	2.47436	0.0415534	non-specific lipid-transfer protein 4-like
Up-regulated	1	L. rigidum	Undisturbed	TraesCS7A02G407600.1	2.46897	0.00586354	benzyl alcohol O-benzoyltransferase-like
Up-regulated	1	L. rigidum	Undisturbed	TraesCS7B02G351900.1	2.46893	0.00288391	non-specific lipid-transfer protein-like
Up-regulated	1	L. rigidum	Undisturbed	TraesCS7B02G077500.1	2.46315	0.042026	probable carboxylesterase 12
Up-regulated	1	L. rigidum	Undisturbed	TraesCS1D02G411700.1	2.45767	0.000587581	uncharacterized protein LOC109761991
Up-regulated	1	L. rigidum	Undisturbed	TraesCS2A02G578000.1	2.4462	0.00425144	putative glutathione S-transferase
Up-regulated	1	L. rigidum	Undisturbed	TraesCS1A02G173200.3	2.44413	0.0453085	membrane steroid-binding protein 1-like
Up-regulated	1	L. rigidum	Undisturbed	TraesCS7A02G204900.1	2.4344	0.0394306	GDSL esterase/lipase At5g37690-like
Up-regulated	1	L. rigidum	Undisturbed	TraesCS2A02G497100.1	2.40682	0.014199	tropinone reductase homolog At2g29290-like
Up-regulated	1	L. rigidum	Undisturbed	TraesCS4B02G383100.1	2.37208	0.00445762	metacaspase-1-like
Up-regulated	1	L. rigidum	Undisturbed	TraesCS2D02G313700.1	2.36737	0.0486071	non-functional NADPH-dependent codeinone reductase 2
Up-regulated	1	L. rigidum	Undisturbed	TraesCS2D02G187300.1	2.35919	0.0209325	unnamed protein product
Up-regulated	1	L. rigidum	Undisturbed	TraesCS1A02G181000.1	2.34869	0.013368	methionine gamma-lyase
Up-regulated	1	L. rigidum	Undisturbed	TraesCS5D02G232400.1	2.34052	0.0123259	cinnamoyl-CoA reductase 1-like
Up-regulated	1	L. rigidum	Undisturbed	TraesCS3B02G013100.1	2.33761	0.00556029	Hydroquinone glucosyltransferase, putative, expressed [Source:UniProtKB/TrEMBL;Acc:D8LAL9]
Up-regulated	1	L. rigidum	Undisturbed	TraesCS1B02G194900.1	2.28797	0.0233065	glutathione S-transferase U17-like
Up-regulated	1	L. rigidum	Undisturbed	TraesCS7D02G030800.1	2.27639	0.0130845	probable glutathione S-transferase GSTU6
Up-regulated	1	L. rigidum	Undisturbed	TraesCS3D02G381400.1	2.27294	0.01235	amino acid permease 6-like
Up-regulated	1	L. rigidum	Undisturbed	TraesCS2A02G061100.3	2.26123	0.0293214	probable cleavage and polyadenylation specificity factor subunit 1
Up-regulated	1	L. rigidum	Undisturbed	TraesCS2B02G012000.1	2.22004	0.0157812	Glycosyltransferase [Source:UniProtKB/TrEMBL;Acc:A0A341QNN1]
Up-regulated	1	L. rigidum	Undisturbed	TraesCS1A02G248700.1	2.21005	0.0486071	CASP-like protein [Source:UniProtKB/TrEMBL;Acc:W4ZRP3]
Up-regulated	1	L. rigidum	Undisturbed	TraesCS3B02G075600.1	2.20087	0.0223185	germin F
Up-regulated	1	L. rigidum	Undisturbed	TraesCS5B02G219700.1	2.16666	0.0494996	tetraspanin-8
Up-regulated	1	L. rigidum	Undisturbed	TraesCS3D02G540200.1	2.1599	0.0104911	tricetin 3',4',5'-O-trimethyltransferase
Up-regulated	1	L. rigidum	Undisturbed	TraesCSU02G060400.3	2.15691	0.0352628	disease resistance RPP13-like protein 4
Up-regulated	1	L. rigidum	Undisturbed	TraesCS4A02G211800.1	2.15444	0.0231391	transcriptional corepressor SEUSS-like
Up-regulated	1	L. rigidum	Undisturbed	TraesCS2D02G259200.2	2.15048	0.00335389	myb family transcription factor EFM-like
Up-regulated	1	L. rigidum	Undisturbed	TraesCS2A02G301500.1	2.14888	0.0180663	hypothetical protein
Up-regulated	1	L. rigidum	Undisturbed	TraesCS2B02G398000.2	2.14809	0.0293029	Phenylalanine ammonia-lyase [Source:UniProtKB/TrEMBL;Acc:A0A1D5U587]
Up-regulated	1	L. rigidum	Undisturbed	TraesCS4D02G132600.2	2.1452	0.0249309	nuclear pore complex protein NUP98A-like
Up-regulated	1	L. rigidum	Undisturbed	TraesCS5A02G369100.1	2.1065	0.0455332	N/A
Up-regulated	1	L. rigidum	Undisturbed	TraesCS6A02G263500.1	2.10625	0.0241841	Nitrate transporter 1.5
Up-regulated	1	L. rigidum	Undisturbed	TraesCS5A02G545200.1	2.09629	0.0429113	germin-like protein 8-5
Up-regulated	1	L. rigidum	Undisturbed	TraesCS5A02G499900.1	2.06748	0.00225247	respiratory burst oxidase homolog protein B-like
Up-regulated	1	L. rigidum	Undisturbed	TraesCS7D02G383300.1	2.06126	0.0475081	germin-like protein 8-4
Up-regulated	1	L. rigidum	Undisturbed	TraesCS6B02G226500.1	2.0588	0.0473642	uncharacterized protein LOC109770311
Up-regulated	1	L. rigidum	Undisturbed	TraesCS4A02G097900.1	2.0537	0.0214012	heat shock cognate 70 kDa protein 2-like
Up-regulated	1	L. rigidum	Undisturbed	TraesCS2B02G174500.1	2.04845	0.00357526	uncharacterized protein LOC109757957
Up-regulated	1	L. rigidum	Undisturbed	TraesCS6A02G379400.1	2.04583	0.00965759	hypothetical protein TRIUR3_26900
Up-regulated	1	L. rigidum	Undisturbed	TraesCSU02G128800.1	2.02683	0.0216259	germin-like protein 8-5
Up-regulated	1	L. rigidum	Undisturbed	TraesCS2A02G297100.1	2.02648	0.0180599	non-specific lipid-transfer protein 4-like
Up-regulated	1	L. rigidum	Undisturbed	TraesCS5A02G369200.1	2.01806	0.0291771	N/A
Up-regulated	1	L. rigidum	Undisturbed	TraesCS6D02G212400.1	2.01451	0.0153127	Phenylalanine ammonia-lyase
Up-regulated	1	L. rigidum	Undisturbed	TraesCS6A02G286100.3	1.99371	0.00768161	enhancer of mRNA-decapping protein 4-like
Up-regulated	1	L. rigidum	Undisturbed	TraesCS3B02G312900.3	1.97403	0.0353798	polynucleotide 3'-phosphatase ZDP
Up-regulated	1	L. rigidum	Undisturbed	TraesCS2A02G522100.1	1.96362	0.014766	hypothetical protein TRIUR3_32658
Up-regulated	1	L. rigidum	Undisturbed	TraesCS4D02G011000.1	1.95831	0.0170022	protein TsetseEP-like
Up-regulated	1	L. rigidum	Undisturbed	TraesCS4D02G053700.1	1.95144	0.0168067	glucan endo-1,3-beta-glucosidase 7-like
Up-regulated	1	L. rigidum	Undisturbed	TraesCS3A02G258100.1	1.94962	0.0233334	GDSL esterase/lipase At5g45910-like
Up-regulated	1	L. rigidum	Undisturbed	TraesCS4D02G357100.1	1.94729	0.0411841	probable apyrase 3
Up-regulated	1	L. rigidum	Undisturbed	TraesCS5A02G261400.1	1.94434	0.0324206	berberine bridge enzyme-like 18
Up-regulated	1	L. rigidum	Undisturbed	TraesCS2B02G319700.1	1.92714	0.0429113	subtilisin-like protease SBT1.7
Up-regulated	1	L. rigidum	Undisturbed	TraesCS5B02G131500.1	1.91826	0.0437576	stem-specific protein TSJT1
Up-regulated	1	L. rigidum	Undisturbed	TraesCS1A02G186100.1	1.89398	0.0164264	probable glutathione S-transferase GSTU6
Up-regulated	1	L. rigidum	Undisturbed	TraesCS2B02G317600.1	1.88127	0.0127443	unnamed protein product
Up-regulated	1	L. rigidum	Undisturbed	TraesCS3D02G023900.2	1.86794	0.00254722	Glutamate decarboxylase [Source:UniProtKB/TrEMBL;Acc:A0A1D5WTH3]
Up-regulated	1	L. rigidum	Undisturbed	TraesCS5D02G435900.2	1.84766	0.0426952	indole-3-acetaldehyde oxidase-like
Up-regulated	1	L. rigidum	Undisturbed	TraesCS5B02G006400.1	1.8261	0.00363393	BEL1-like homeodomain protein 6
Up-regulated	1	L. rigidum	Undisturbed	TraesCS5B02G517500.1	1.81606	0.0189367	Cellulose synthase [Source:UniProtKB/TrEMBL;Acc:A0A341VNV6]
Up-regulated	1	L. rigidum	Undisturbed	TraesCS7A02G386800.1	1.80061	0.0360002	germin-like protein 8-4
Up-regulated	1	L. rigidum	Undisturbed	TraesCS1A02G268400.1	1.77046	6.75145e-05	isoflavone reductase homolog IRL-like
Up-regulated	1	L. rigidum	Undisturbed	TraesCS2B02G481600.1	1.7101	0.000313699	germin-like protein 4-1
Up-regulated	1	L. rigidum	Undisturbed	TraesCS2A02G010700.1	1.68836	0.0317918	cytochrome P450 89A2-like
Up-regulated	1	L. rigidum	Undisturbed	TraesCS2D02G300100.1	1.68529	0.0198386	loricrin-like
Up-regulated	1	L. rigidum	Undisturbed	TraesCSU02G127900.1	1.67135	0.0473885	Germin-like protein 8-5
Up-regulated	1	L. rigidum	Undisturbed	TraesCS1B02G279100.2	1.66414	0.0044259	isoflavone reductase homolog IRL-like
Up-regulated	1	L. rigidum	Undisturbed	TraesCS7A02G040900.2	1.66228	0.00259861	Sucrose synthase [Source:UniProtKB/TrEMBL;Acc:A0A1D6SCP9]
Up-regulated	1	L. rigidum	Undisturbed	TraesCS6B02G384500.1	1.6432	0.0175017	probable alpha,alpha-trehalose-phosphate synthase [UDP-forming] 11
Up-regulated	1	L. rigidum	Undisturbed	TraesCS6B02G236800.1	1.64001	0.00522698	protein NBR1 homolog
Up-regulated	1	L. rigidum	Undisturbed	TraesCS2A02G578400.1	1.61981	0.0035406	putative glutathione S-transferase
Up-regulated	1	L. rigidum	Undisturbed	TraesCS4B02G112000.1	1.61451	0.0281442	abscisic stress-ripening protein
Up-regulated	1	L. rigidum	Undisturbed	TraesCS4A02G137000.1	1.60616	0.00364667	alanine--glyoxylate aminotransferase 2 homolog 3, mitochondrial-like
Up-regulated	1	L. rigidum	Undisturbed	TraesCS5B02G101400.1	1.6015	0.0110768	COBRA-like protein [Source:UniProtKB/TrEMBL;Acc:A0A341V8J3]
Up-regulated	1	L. rigidum	Undisturbed	TraesCS6B02G179900.2	1.56319	0.00700833	probable 4-coumarate--CoA ligase 3
Up-regulated	1	L. rigidum	Undisturbed	TraesCS6A02G405700.1	1.56123	0.0035776	aquaporin PIP1-5
Up-regulated	1	L. rigidum	Undisturbed	TraesCS5D02G419000.1	1.53684	0.0491083	uncharacterized protein LOC109766014
Up-regulated	1	L. rigidum	Undisturbed	TraesCS1D02G096300.1	1.53387	0.00130276	Peroxidase [Source:UniProtKB/TrEMBL;Acc:W5AMY7]
Up-regulated	1	L. rigidum	Undisturbed	TraesCS4B02G034500.1	1.53274	0.0167041	Lysine--tRNA ligase [Source:UniProtKB/TrEMBL;Acc:W5E9U7]
Up-regulated	1	L. rigidum	Undisturbed	TraesCSU02G025500.1	1.5236	0.0378009	CO(2)-response secreted protease-like
Up-regulated	1	L. rigidum	Undisturbed	TraesCS6A02G041700.1	1.50506	0.00538977	Catalase [Source:UniProtKB/TrEMBL;Acc:W5GEI6]
Up-regulated	1	L. rigidum	Undisturbed	TraesCS5A02G222500.1	1.49912	0.000930364	Cellulose synthase [Source:UniProtKB/TrEMBL;Acc:A0A1D5YKK8]
Up-regulated	1	L. rigidum	Undisturbed	TraesCS1B02G292600.1	1.49797	0.0165699	Laccase [Source:UniProtKB/TrEMBL;Acc:A0A1D5S6Z9]
Up-regulated	1	L. rigidum	Undisturbed	TraesCS7B02G188400.2	1.47925	0.0069072	probable mixed-linked glucan synthase 6
Up-regulated	1	L. rigidum	Undisturbed	TraesCS1A02G104200.1	1.47747	0.00393969	Peroxidase [Source:UniProtKB/TrEMBL;Acc:W4ZXX6]
Up-regulated	1	L. rigidum	Undisturbed	TraesCS1B02G237000.1	1.47159	0.0238878	unnamed protein product
Up-regulated	1	L. rigidum	Undisturbed	TraesCS5A02G095200.1	1.47087	0.00599665	COBRA-like protein [Source:UniProtKB/TrEMBL;Acc:A0A341UTH2]
Up-regulated	1	L. rigidum	Undisturbed	TraesCS2D02G460200.1	1.4542	0.002366	germin-like protein 4-1
Up-regulated	1	L. rigidum	Undisturbed	TraesCS7A02G052600.1	1.4513	0.0476422	aspartyl protease family protein At5g10770-like
Up-regulated	1	L. rigidum	Undisturbed	TraesCS7D02G159800.3	1.38914	0.0146597	Sucrose synthase
Up-regulated	1	L. rigidum	Undisturbed	TraesCS2A02G459900.1	1.3807	0.0143825	germin-like protein 4-1
Up-regulated	1	L. rigidum	Undisturbed	TraesCS3B02G386600.1	1.36343	0.0296601	putative respiratory burst oxidase homolog protein H
Up-regulated	1	L. rigidum	Undisturbed	TraesCS4A02G446700.1	1.33894	0.00486668	Sucrose synthase [Source:UniProtKB/TrEMBL;Acc:A0A1D6SCP9]
Up-regulated	1	L. rigidum	Undisturbed	TraesCS4A02G214200.2	1.33664	0.0204105	Protein disulfide-isomerase [Source:UniProtKB/TrEMBL;Acc:Q7FYS2]
Up-regulated	1	L. rigidum	Undisturbed	TraesCS3A02G102000.1	1.32414	0.0137158	probable NADPH:quinone oxidoreductase 1
Up-regulated	1	L. rigidum	Undisturbed	TraesCS3B02G612000.1	1.30591	0.0153103	caffeic acid 3-O-methyltransferase
Up-regulated	1	L. rigidum	Undisturbed	TraesCS3B02G324500.2	1.29894	0.00421752	cellulose synthase, expressed
Up-regulated	1	L. rigidum	Undisturbed	TraesCS4B02G005900.1	1.29648	0.0468144	geraniol 8-hydroxylase-like
Up-regulated	1	L. rigidum	Undisturbed	TraesCS3A02G289900.1	1.2936	0.00687863	cellulose synthase A catalytic subunit 4 [UDP-forming]
Up-regulated	1	L. rigidum	Undisturbed	TraesCS7A02G333900.1	1.28961	0.0100172	flavone O-methyltransferase 1
Up-regulated	1	L. rigidum	Undisturbed	TraesCS3D02G289600.1	1.28699	0.00849995	cellulose synthase A catalytic subunit 4 [UDP-forming]
Up-regulated	1	L. rigidum	Undisturbed	TraesCS4D02G079900.1	1.28685	0.031019	probable 2-oxoglutarate-dependent dioxygenase At5g05600
Up-regulated	1	L. rigidum	Undisturbed	TraesCS7D02G036600.2	1.27106	0.0109127	Sucrose synthase [Source:UniProtKB/TrEMBL;Acc:A0A1D6D1F6]
Up-regulated	1	L. rigidum	Undisturbed	TraesCS3D02G078700.1	1.26988	0.033544	ricin B-like lectin R40G3
Up-regulated	1	L. rigidum	Undisturbed	TraesCS5D02G230300.1	1.26427	0.0121873	Cellulose synthase [Source:UniProtKB/TrEMBL;Acc:A0A1D6S6D0]
Up-regulated	1	L. rigidum	Undisturbed	TraesCS1D02G146600.1	1.26372	0.00788917	Cellulose synthase [Source:UniProtKB/TrEMBL;Acc:A0A341PFX7]
Up-regulated	1	L. rigidum	Undisturbed	TraesCS2D02G170400.1	1.25767	0.00390644	Phospho-2-dehydro-3-deoxyheptonate aldolase [Source:UniProtKB/TrEMBL;Acc:A0A1D5UWN7]
Up-regulated	1	L. rigidum	Undisturbed	TraesCS7D02G048000.1	1.23727	0.019142	aspartyl protease family protein At5g10770-like
Up-regulated	1	L. rigidum	Undisturbed	TraesCS2D02G460100.1	1.22772	0.0499609	germin-like protein 4-1
Up-regulated	1	L. rigidum	Undisturbed	TraesCS1B02G167200.1	1.21238	0.014857	Cellulose synthase [Source:UniProtKB/TrEMBL;Acc:A0A341P280]
Up-regulated	1	L. rigidum	Undisturbed	TraesCS7D02G048200.1	1.19926	0.0222076	aspartyl protease family protein At5g10770-like
Up-regulated	1	L. rigidum	Undisturbed	TraesCS2B02G221800.1	1.1621	0.0296601	Tubulin alpha chain
Up-regulated	1	L. rigidum	Undisturbed	TraesCS1A02G149300.1	1.12911	0.0168067	Cellulose synthase [Source:UniProtKB/TrEMBL;Acc:W4ZU60]
Up-regulated	1	L. rigidum	Undisturbed	TraesCS7D02G341500.1	1.11288	0.0313994	flavone O-methyltransferase 1
Up-regulated	1	L. rigidum	Undisturbed	TraesCS1D02G268500.1	1.05197	0.0301303	isoflavone reductase homolog IRL-like

## Sheet: 5 Weeks Und vs Dis
Tags	Week	Disturbance	Name	logFC	FDR	Description
Up-regulated	5	Undisturbed	TraesCS3D02G266400.1	11.8314	1.79248e-39	glutamate synthase 1 [NADH], chloroplastic
Up-regulated	5	Undisturbed	TraesCS6B02G206500.2	11.4166	1.75924e-08	Coatomer subunit beta' [Source:UniProtKB/TrEMBL;Acc:A0A1D6AZX6]
Up-regulated	5	Undisturbed	TraesCS2B02G304600.1	11.2662	4.24052e-26	protein MEI2-like 4
Up-regulated	5	Undisturbed	TraesCS6A02G107300.1	11.2329	5.6649e-10	putative histone acetyltransferase HAC-like 1
Up-regulated	5	Undisturbed	TraesCS2D02G408200.3	10.7812	8.64612e-25	BEACH domain-containing protein C2
Up-regulated	5	Undisturbed	TraesCS7D02G269500.1	10.6122	8.59697e-29	probable protein NAP1
Up-regulated	5	Undisturbed	TraesCS5A02G532500.2	10.5961	2.07661e-14	mediator of RNA polymerase II transcription
Up-regulated	5	Undisturbed	TraesCS2B02G320800.1	10.4306	8.55674e-26	DExH-box ATP-dependent RNA helicase DExH7, chloroplastic-like
Up-regulated	5	Undisturbed	TraesCS6D02G261100.1	10.2908	2.04861e-10	Clustered mitochondria protein homolog [Source:UniProtKB/TrEMBL;Acc:A0A341XFB8]
Up-regulated	5	Undisturbed	TraesCS6A02G280800.3	10.2365	3.96666e-09	Clustered mitochondria protein homolog [Source:UniProtKB/TrEMBL;Acc:A0A341WMU2]
Up-regulated	5	Undisturbed	TraesCS4A02G169300.12	10.0545	5.63654e-18	uncharacterized protein LOC109768951
Up-regulated	5	Undisturbed	TraesCS2D02G165900.4	9.78826	3.60537e-18	transcription factor MYB124-like
Up-regulated	5	Undisturbed	TraesCS2A02G200200.2	9.71322	9.4758e-13	uncharacterized protein LOC109771571
Up-regulated	5	Undisturbed	TraesCS1A02G131000.4	9.55021	2.83681e-10	uncharacterized protein LOC109768506
Up-regulated	5	Undisturbed	TraesCS1D02G132200.4	9.45378	3.50139e-13	uncharacterized protein LOC109768506
Up-regulated	5	Undisturbed	TraesCSU02G115700.2	9.32562	1.26153e-12	kinesin-like protein KIN-14E
Up-regulated	5	Undisturbed	TraesCS4A02G481800.1	9.24265	1.52686e-13	Acetyltransferase component of pyruvate dehydrogenase complex [Source:UniProtKB/TrEMBL;Acc:A0A1D5X9E5]
Up-regulated	5	Undisturbed	TraesCS5D02G371100.6	9.16578	4.47564e-06	uncharacterized protein LOC109755277
Up-regulated	5	Undisturbed	TraesCS3D02G448800.1	9.0972	6.26544e-05	esterase PIR7B-like
Up-regulated	5	Undisturbed	TraesCS3A02G112300.2	9.03824	2.75558e-10	homeobox-DDT domain protein RLT3-like
Up-regulated	5	Undisturbed	TraesCS4A02G178100.2	9.03763	1.70512e-10	probable receptor-like protein kinase At5g18500
Up-regulated	5	Undisturbed	TraesCS1A02G207700.2	8.99151	4.61492e-12	tetratricopeptide repeat protein SKI3
Up-regulated	5	Undisturbed	TraesCS1D02G348200.3	8.97364	1.58148e-09	putative leucine-rich repeat receptor-like protein kinase At2g19210
Up-regulated	5	Undisturbed	TraesCS2D02G176200.2	8.83408	7.17146e-25	uncharacterized protein LOC109746707
Up-regulated	5	Undisturbed	TraesCS3A02G105800.1	8.78691	5.94359e-09	Protein ALWAYS EARLY 2
Up-regulated	5	Undisturbed	TraesCS1A02G183900.2	8.74453	5.73392e-09	Non-lysosomal glucosylceramidase [Source:UniProtKB/TrEMBL;Acc:A0A1D5RQI7]
Up-regulated	5	Undisturbed	TraesCS1B02G426200.9	8.71576	3.65553e-09	E3 ubiquitin-protein ligase MBR2-like
Up-regulated	5	Undisturbed	TraesCS2A02G428000.1	8.6587	7.06055e-10	uncharacterized protein LOC109759269
Up-regulated	5	Undisturbed	TraesCS5D02G072000.1	8.53496	1.63298e-11	MATH domain-containing protein At5g43560-like
Up-regulated	5	Undisturbed	TraesCS7A02G328800.1	8.51201	1.68726e-07	flap endonuclease GEN-like 2
Up-regulated	5	Undisturbed	TraesCS2D02G217400.8	8.51035	0.000256845	Serine/threonine-protein kinase [Source:UniProtKB/TrEMBL;Acc:A0A1D5UXD7]
Up-regulated	5	Undisturbed	TraesCS3B02G258000.1	8.47575	1.83977e-08	Auxilin-related protein 1
Up-regulated	5	Undisturbed	TraesCS5B02G563700.4	8.47104	4.37463e-09	Mediator of RNA polymerase II transcription subunit 13 [Source:UniProtKB/TrEMBL;Acc:A0A1D5Z6C6]
Up-regulated	5	Undisturbed	TraesCS2A02G223100.3	8.46318	2.35355e-08	calcium-dependent protein kinase
Up-regulated	5	Undisturbed	TraesCS7B02G127000.1	8.41217	3.23378e-06	enhancer of mRNA-decapping protein 4-like
Up-regulated	5	Undisturbed	TraesCS2B02G309400.2	8.24226	1.64086e-07	RNA polymerase II C-terminal domain phosphatase-like 4
Up-regulated	5	Undisturbed	TraesCS3A02G197700.7	8.23413	1.45984e-06	serine/threonine-protein phosphatase 4 regulatory subunit 3B
Up-regulated	5	Undisturbed	TraesCS2A02G150600.2	8.23076	2.74803e-09	Non-specific serine/threonine protein kinase [Source:UniProtKB/TrEMBL;Acc:A0A0D3R0R8]
Up-regulated	5	Undisturbed	TraesCS3D02G214800.1	8.2185	6.37639e-05	serine/threonine-protein kinase AFC3-like
Up-regulated	5	Undisturbed	TraesCS3B02G339200.1	8.19996	1.70512e-10	protein PLASTID TRANSCRIPTIONALLY ACTIVE 12
Up-regulated	5	Undisturbed	TraesCS3D02G219300.2	8.19276	4.8798e-10	NFATC2-interacting protein
Up-regulated	5	Undisturbed	TraesCS4D02G143400.3	8.18662	2.44553e-06	U2 snRNP auxiliary factor large subunit [Source:UniProtKB/TrEMBL;Acc:A0A341UIY3]
Up-regulated	5	Undisturbed	TraesCS7B02G138900.6	8.1366	1.63875e-05	Auxin response factor [Source:UniProtKB/TrEMBL;Acc:A0A1D6SE36]
Up-regulated	5	Undisturbed	TraesCS7D02G309600.4	8.1253	8.43695e-08	uncharacterized protein LOC109786556
Up-regulated	5	Undisturbed	TraesCS5B02G391500.1	8.10624	1.12736e-05	YTH domain-containing family protein 3-like
Up-regulated	5	Undisturbed	TraesCS7D02G290300.2	8.0676	9.62381e-10	polyadenylation and cleavage factor homolog 4
Up-regulated	5	Undisturbed	TraesCS7B02G047100.4	7.91433	1.70929e-07	probable transcriptional regulator SLK3
Up-regulated	5	Undisturbed	TraesCS7A02G143200.1	7.90109	1.65978e-06	probable protein phosphatase 2C 54
Up-regulated	5	Undisturbed	TraesCS2A02G000700.1	7.89093	2.22512e-06	uncharacterized protein LOC109784859
Up-regulated	5	Undisturbed	TraesCS2D02G043500.4	7.85299	9.76578e-06	cytochrome P450 93A2-like
Up-regulated	5	Undisturbed	TraesCS2B02G385300.2	7.81936	9.29778e-05	ATP-dependent DNA helicase DDM1-like
Up-regulated	5	Undisturbed	TraesCS7D02G403000.2	7.80648	6.02946e-08	ATP-citrate synthase beta chain protein 1-like
Up-regulated	5	Undisturbed	TraesCS5B02G222600.2	7.74667	3.76655e-11	kinesin-like protein KIN-7I
Up-regulated	5	Undisturbed	TraesCS4D02G163700.2	7.74314	1.43909e-06	villin-2-like
Up-regulated	5	Undisturbed	TraesCS3B02G402700.2	7.65359	2.73494e-07	nucleobase-ascorbate transporter 12
Up-regulated	5	Undisturbed	TraesCS6A02G337800.1	7.64565	1.49854e-06	subtilisin-like protease SBT1.4
Up-regulated	5	Undisturbed	TraesCS2B02G430200.1	7.56114	8.35011e-05	protease inhibitor-like protein
Up-regulated	5	Undisturbed	TraesCS4B02G344600.1	7.46903	5.45107e-07	50S ribosomal protein L5, chloroplastic
Up-regulated	5	Undisturbed	TraesCS2A02G107800.1	7.41342	4.19464e-05	Peroxidase
Up-regulated	5	Undisturbed	TraesCS7B02G241400.1	7.20227	2.28256e-05	aluminum-activated malate transporter 10-like
Up-regulated	5	Undisturbed	TraesCS4A02G187600.3	7.18758	0.000906102	protein ZINC INDUCED FACILITATOR-LIKE 1-like
Up-regulated	5	Undisturbed	TraesCS7D02G132100.2	7.18227	9.07965e-05	Fanconi-associated nuclease [Source:UniProtKB/TrEMBL;Acc:A0A1D6CW63]
Up-regulated	5	Undisturbed	TraesCS3D02G545700.1	7.14921	4.76802e-07	uncharacterized protein LOC109768835
Up-regulated	5	Undisturbed	TraesCS2D02G465900.1	6.88825	5.83045e-09	unnamed protein product
Up-regulated	5	Undisturbed	TraesCS3D02G029400.1	6.8875	1.59422e-05	E3 ubiquitin-protein ligase [Source:UniProtKB/TrEMBL;Acc:A0A1D5WTX4]
Up-regulated	5	Undisturbed	TraesCS7D02G530700.1	6.78531	6.60781e-06	GDSL esterase/lipase At4g28780-like
Up-regulated	5	Undisturbed	TraesCS1A02G133700.2	6.78091	4.5363e-09	ER membrane protein complex subunit 1
Up-regulated	5	Undisturbed	TraesCS1D02G402400.1	6.53527	1.48866e-06	probable calcium-binding protein CML30
Up-regulated	5	Undisturbed	TraesCSU02G224000.1	6.53246	0.00400925	putative ripening-related protein 4
Up-regulated	5	Undisturbed	TraesCS5D02G012500.1	6.42276	0.00015697	protein NRT1/ PTR FAMILY 2.11-like
Up-regulated	5	Undisturbed	TraesCS1B02G297000.3	6.18843	1.73249e-05	SAC3 family protein A
Up-regulated	5	Undisturbed	TraesCS4A02G277900.1	6.18233	7.16151e-05	premnaspirodiene oxygenase-like
Up-regulated	5	Undisturbed	TraesCS3D02G053900.1	6.06919	0.00347454	UDP-glycosyltransferase 88F3-like
Up-regulated	5	Undisturbed	TraesCS5D02G444700.1	6.01137	1.11862e-05	probable LRR receptor-like serine/threonine-protein kinase At3g47570
Up-regulated	5	Undisturbed	TraesCS2A02G304100.1	5.78671	7.17036e-06	DExH-box ATP-dependent RNA helicase DExH7, chloroplastic-like
Up-regulated	5	Undisturbed	TraesCS1D02G032400.1	5.74181	0.000853978	uncharacterized protein At4g15970-like
Up-regulated	5	Undisturbed	TraesCS4D02G168600.1	5.74136	7.2739e-05	uncharacterized protein LOC109733510
Up-regulated	5	Undisturbed	TraesCS3B02G290200.1	5.54206	0.012322	Glycosyltransferase [Source:UniProtKB/TrEMBL;Acc:W5CRV4]
Up-regulated	5	Undisturbed	TraesCS7B02G011400.1	5.53062	0.000186846	acidic endochitinase-like
Up-regulated	5	Undisturbed	TraesCS1D02G213300.1	5.45158	0.000900931	14 kDa proline-rich protein DC2.15-like
Up-regulated	5	Undisturbed	TraesCS2D02G336800.1	5.3106	4.13358e-05	probable aldo-keto reductase 3
Up-regulated	5	Undisturbed	TraesCS5D02G378300.1	5.24912	0.00351821	Protein DETOXIFICATION [Source:UniProtKB/TrEMBL;Acc:W5FV95]
Up-regulated	5	Undisturbed	TraesCS5B02G165100.3	5.22243	0.00509244	protein RDM16
Up-regulated	5	Undisturbed	TraesCS4D02G036900.1	5.21479	0.00153249	senescence-specific cysteine protease SAG39-like
Up-regulated	5	Undisturbed	TraesCS4B02G040300.1	5.16621	8.45857e-06	putative UDP-rhamnose:rhamnosyltransferase 1
Up-regulated	5	Undisturbed	TraesCS3D02G210100.1	5.15752	0.00313756	ATP-dependent zinc metalloprotease FTSH 5, mitochondrial
Up-regulated	5	Undisturbed	TraesCS3B02G405600.1	5.15496	0.000146028	acidic endochitinase-like
Up-regulated	5	Undisturbed	TraesCS3A02G373400.1	5.1049	0.0006288	Acidic endochitinase SE2
Up-regulated	5	Undisturbed	TraesCS5D02G407400.1	5.09878	0.0154964	isoflavone 2'-hydroxylase-like
Up-regulated	5	Undisturbed	TraesCSU02G090800.1	5.0752	2.39643e-05	hypothetical protein GQ55_8G206100
Up-regulated	5	Undisturbed	TraesCS6A02G345900.1	5.06651	0.00199268	senescence-specific cysteine protease SAG39-like
Up-regulated	5	Undisturbed	TraesCS2A02G504500.1	5.0179	0.000278955	subtilisin-like protease SBT1.7
Up-regulated	5	Undisturbed	TraesCS5D02G562400.2	5.01536	0.00174426	uncharacterized protein LOC109733667
Up-regulated	5	Undisturbed	TraesCS6B02G182100.1	4.97104	0.00267513	senescence-specific cysteine protease SAG39-like
Up-regulated	5	Undisturbed	TraesCS2A02G541000.1	4.96619	0.000216434	Exocyst subunit Exo70 family protein [Source:UniProtKB/TrEMBL;Acc:A0A1D6RJD9]
Up-regulated	5	Undisturbed	TraesCS1B02G256200.2	4.96139	0.00336526	E3 ubiquitin-protein ligase KEG
Up-regulated	5	Undisturbed	TraesCS3A02G349700.1	4.93792	0.00166477	acidic endochitinase-like
Up-regulated	5	Undisturbed	TraesCS1A02G422500.1	4.93202	0.00300443	Glucan endo-1,3-beta-glucosidase 13
Up-regulated	5	Undisturbed	TraesCS3A02G373100.1	4.91126	0.000786441	unnamed protein product
Up-regulated	5	Undisturbed	TraesCS7A02G113700.1	4.91087	0.00892463	acidic endochitinase-like
Up-regulated	5	Undisturbed	TraesCS4B02G109700.1	4.89879	9.50956e-10	FHA domain-containing protein PS1
Up-regulated	5	Undisturbed	TraesCS5A02G459700.1	4.88447	0.000105834	GDSL esterase/lipase At5g55050-like
Up-regulated	5	Undisturbed	TraesCS4B02G039700.1	4.86258	0.00272494	senescence-specific cysteine protease SAG39-like
Up-regulated	5	Undisturbed	TraesCS7B02G385200.1	4.86013	0.00589299	cortical cell-delineating protein-like
Up-regulated	5	Undisturbed	TraesCS3B02G049100.5	4.85437	1.39143e-06	LEAF RUST 10 DISEASE-RESISTANCE LOCUS RECEPTOR-LIKE PROTEIN KINASE-like 1.2
Up-regulated	5	Undisturbed	TraesCS7D02G392000.1	4.84251	2.71173e-06	Peroxidase
Up-regulated	5	Undisturbed	TraesCS2D02G469700.1	4.82976	0.00230082	acidic endochitinase-like
Up-regulated	5	Undisturbed	TraesCS2B02G492500.1	4.82009	0.000808467	acidic endochitinase-like
Up-regulated	5	Undisturbed	TraesCS6D02G329900.1	4.79839	0.00137203	senescence-specific cysteine protease SAG39-like
Up-regulated	5	Undisturbed	TraesCS1B02G183400.1	4.78715	0.000310971	putative ripening-related protein 4
Up-regulated	5	Undisturbed	TraesCS1B02G194600.1	4.76859	0.00672302	probable glutathione S-transferase GSTU6
Up-regulated	5	Undisturbed	TraesCS7D02G030800.1	4.75523	0.01523	probable glutathione S-transferase GSTU6
Up-regulated	5	Undisturbed	TraesCS6A02G346800.1	4.75188	1.81148e-05	senescence-specific cysteine protease SAG39-like
Up-regulated	5	Undisturbed	TraesCS5A02G432300.1	4.74819	0.0178749	putative ripening-related protein 4
Up-regulated	5	Undisturbed	TraesCSU02G070500.1	4.74427	0.000952894	germin-like protein 9-3
Up-regulated	5	Undisturbed	TraesCS6D02G144000.1	4.71687	0.00541371	senescence-specific cysteine protease SAG39-like
Up-regulated	5	Undisturbed	TraesCS2B02G288000.1	4.71154	0.00541194	Lipase [Source:UniProtKB/TrEMBL;Acc:A0A1D6RKT7]
Up-regulated	5	Undisturbed	TraesCS2D02G206600.1	4.70502	0.000394686	L-type lectin-domain containing receptor kinase IX.1
Up-regulated	5	Undisturbed	TraesCS3A02G258000.1	4.69844	0.0299162	ABC transporter B family member 4
Up-regulated	5	Undisturbed	TraesCS7A02G548200.1	4.69312	4.81195e-05	basic endochitinase A-like
Up-regulated	5	Undisturbed	TraesCS2A02G469800.1	4.67883	0.0029323	acidic endochitinase-like
Up-regulated	5	Undisturbed	TraesCS6A02G346500.1	4.67349	0.000363699	senescence-specific cysteine protease SAG39-like
Up-regulated	5	Undisturbed	TraesCS6D02G302300.2	4.66782	0.0331885	putative 12-oxophytodienoate reductase 11
Up-regulated	5	Undisturbed	TraesCS6B02G182200.1	4.66086	0.00322351	senescence-specific cysteine protease SAG39-like
Up-regulated	5	Undisturbed	TraesCS3D02G010900.1	4.65036	0.000938159	germin-like protein 8-11
Up-regulated	5	Undisturbed	TraesCS6D02G328000.1	4.64467	0.000453481	senescence-specific cysteine protease SAG39
Up-regulated	5	Undisturbed	TraesCS3D02G366100.1	4.64206	8.49625e-05	acidic endochitinase-like
Up-regulated	5	Undisturbed	TraesCS3B02G405900.1	4.6412	0.000997441	Acidic endochitinase
Up-regulated	5	Undisturbed	TraesCS5B02G523100.1	4.63549	0.000579337	senescence-specific cysteine protease SAG39-like
Up-regulated	5	Undisturbed	TraesCS3B02G405500.1	4.63025	0.00113546	acidic endochitinase-like
Up-regulated	5	Undisturbed	TraesCS4B02G040000.1	4.62524	0.0106131	senescence-specific cysteine protease SAG39-like
Up-regulated	5	Undisturbed	TraesCS5A02G497600.1	4.62048	0.000439991	probable serine/threonine-protein kinase PBL21
Up-regulated	5	Undisturbed	TraesCS2B02G492600.1	4.60179	0.002875	acidic endochitinase-like
Up-regulated	5	Undisturbed	TraesCS2D02G269800.9	4.59755	0.0407775	unnamed protein product
Up-regulated	5	Undisturbed	TraesCS6A02G346600.1	4.59539	0.000612156	senescence-specific cysteine protease SAG39-like
Up-regulated	5	Undisturbed	TraesCS7A02G113300.1	4.58837	0.00210656	acidic endochitinase-like
Up-regulated	5	Undisturbed	TraesCS7D02G108800.1	4.58339	0.00157384	acidic endochitinase-like
Up-regulated	5	Undisturbed	TraesCS2A02G108000.1	4.57799	0.0296892	Peroxidase
Up-regulated	5	Undisturbed	TraesCS6D02G328500.1	4.57221	0.00137203	senescence-specific cysteine protease SAG39-like
Up-regulated	5	Undisturbed	TraesCS6A02G019100.1	4.56816	0.0121088	putative ripening-related protein 5
Up-regulated	5	Undisturbed	TraesCS4A02G417800.1	4.5639	0.00015487	GDSL esterase/lipase At1g29660-like
Up-regulated	5	Undisturbed	TraesCS3D02G429600.1	4.56154	0.00488484	probable glutathione S-transferase GSTU6
Up-regulated	5	Undisturbed	TraesCS5A02G243700.1	4.55692	0.00698821	putative serine carboxypeptidase-like 23
Up-regulated	5	Undisturbed	TraesCS6A02G154300.1	4.5517	0.00107166	senescence-specific cysteine protease SAG39-like
Up-regulated	5	Undisturbed	TraesCS2D02G130100.1	4.5438	0.00586202	benzyl alcohol O-benzoyltransferase-like
Up-regulated	5	Undisturbed	TraesCS7A02G396500.1	4.52088	0.0108461	Peroxidase
Up-regulated	5	Undisturbed	TraesCS4B02G039500.1	4.50643	0.00509294	senescence-specific cysteine protease SAG39-like
Up-regulated	5	Undisturbed	TraesCS5B02G072400.1	4.5003	0.00239211	N/A
Up-regulated	5	Undisturbed	TraesCS7D02G469500.1	4.49585	0.000564467	cortical cell-delineating protein-like
Up-regulated	5	Undisturbed	TraesCS7B02G385600.1	4.49295	0.00275089	cortical cell-delineating protein-like
Up-regulated	5	Undisturbed	TraesCS4B02G039600.1	4.49007	0.0443114	senescence-specific cysteine protease SAG39-like
Up-regulated	5	Undisturbed	TraesCS1A02G145100.1	4.47867	0.0437802	cysteine--tRNA ligase, chloroplastic/mitochondrial-like
Up-regulated	5	Undisturbed	TraesCS5B02G327800.1	4.47702	0.0401201	aspartate--tRNA ligase 2, cytoplasmic-like
Up-regulated	5	Undisturbed	TraesCS7B02G011100.1	4.46461	0.00620335	acidic endochitinase-like
Up-regulated	5	Undisturbed	TraesCS5D02G172800.1	4.46056	0.0234347	puromycin-sensitive aminopeptidase
Up-regulated	5	Undisturbed	TraesCS6D02G328600.1	4.45301	0.0034701	senescence-specific cysteine protease SAG39-like
Up-regulated	5	Undisturbed	TraesCS4A02G274100.1	4.44915	0.000515978	senescence-specific cysteine protease SAG39-like
Up-regulated	5	Undisturbed	TraesCS2B02G126300.1	4.4482	0.00326736	Peroxidase
Up-regulated	5	Undisturbed	TraesCS7D02G091100.1	4.44624	6.92473e-05	AP2-like ethylene-responsive transcription factor At1g16060
Up-regulated	5	Undisturbed	TraesCS4D02G055000.1	4.44291	0.0102351	Alanine--tRNA ligase [Source:UniProtKB/TrEMBL;Acc:A0A1D6S0H3]
Up-regulated	5	Undisturbed	TraesCS3A02G373300.1	4.43342	0.00251394	acidic endochitinase-like
Up-regulated	5	Undisturbed	TraesCS5D02G535500.1	4.43145	2.46436e-07	Expansin [Source:UniProtKB/TrEMBL;Acc:W5FW44]
Up-regulated	5	Undisturbed	TraesCS5D02G251700.1	4.43104	0.000983645	serine carboxypeptidase 2-like
Up-regulated	5	Undisturbed	TraesCS1B02G481300.1	4.42987	0.0242499	acetylserotonin O-methyltransferase 3-like
Up-regulated	5	Undisturbed	TraesCS5B02G470300.1	4.42363	0.00486846	GDSL esterase/lipase At5g55050-like
Up-regulated	5	Undisturbed	TraesCS6B02G378900.1	4.42136	7.55946e-05	senescence-specific cysteine protease SAG39
Up-regulated	5	Undisturbed	TraesCS7D02G220000.1	4.4208	0.00510667	senescence-specific cysteine protease SAG39-like
Up-regulated	5	Undisturbed	TraesCS3D02G366000.1	4.39433	0.0247418	acidic endochitinase-like
Up-regulated	5	Undisturbed	TraesCSU02G188000.1	4.37579	0.0126633	disease resistance protein RGA2-like
Up-regulated	5	Undisturbed	TraesCS6D02G197100.1	4.36797	0.0011618	protein FLOWERING LOCUS T-like
Up-regulated	5	Undisturbed	TraesCS1A02G094700.1	4.36563	6.46906e-05	uncharacterized protein LOC109761708
Up-regulated	5	Undisturbed	TraesCS7B02G272700.1	4.35099	0.00263732	aquaporin NIP1-4-like
Up-regulated	5	Undisturbed	TraesCS6B02G026800.1	4.34389	0.00351821	putative ripening-related protein 5
Up-regulated	5	Undisturbed	TraesCS4D02G036700.1	4.34293	0.00297182	senescence-specific cysteine protease SAG39-like
Up-regulated	5	Undisturbed	TraesCS4D02G310500.1	4.34112	0.00639062	cortical cell-delineating protein-like
Up-regulated	5	Undisturbed	TraesCS3A02G129100.1	4.32584	0.000637837	uncharacterized protein LOC109773655
Up-regulated	5	Undisturbed	TraesCS6D02G329400.1	4.32225	0.00719409	senescence-specific cysteine protease SAG39-like
Up-regulated	5	Undisturbed	TraesCS6D02G329500.1	4.3177	0.0119019	senescence-specific cysteine protease SAG39-like
Up-regulated	5	Undisturbed	TraesCS6D02G131700.1	4.31626	1.7675e-06	flotillin-like protein 1
Up-regulated	5	Undisturbed	TraesCS1D02G225100.1	4.31279	0.00496321	senescence-specific cysteine protease SAG39-like
Up-regulated	5	Undisturbed	TraesCS3B02G039500.1	4.31245	0.00368944	endonuclease 2-like
Up-regulated	5	Undisturbed	TraesCS4B02G348600.1	4.31146	4.27322e-06	Purple acid phosphatase [Source:UniProtKB/TrEMBL;Acc:A0A1D5XG45]
Up-regulated	5	Undisturbed	TraesCS6D02G022500.1	4.30421	0.00358681	putative ripening-related protein 5
Up-regulated	5	Undisturbed	TraesCS2D02G128700.1	4.29834	0.015529	uncharacterized protein LOC109743166
Up-regulated	5	Undisturbed	TraesCS2B02G067800.1	4.28849	0.00643874	senescence-specific cysteine protease SAG39
Up-regulated	5	Undisturbed	TraesCS2A02G493400.1	4.28761	0.00440297	hypothetical protein TRIUR3_26878
Up-regulated	5	Undisturbed	TraesCS6B02G380000.1	4.28367	0.0394502	senescence-specific cysteine protease SAG39-like
Up-regulated	5	Undisturbed	TraesCS7B02G070600.1	4.28343	0.000274847	hypothetical protein BRADI_1g46405v3
Up-regulated	5	Undisturbed	TraesCS3B02G356700.1	4.2751	0.00552279	subtilisin-like protease SBT3.8
Up-regulated	5	Undisturbed	TraesCS5B02G402800.1	4.27331	0.0180918	isoflavone 2'-hydroxylase-like
Up-regulated	5	Undisturbed	TraesCS1A02G005800.2	4.26801	0.0157058	protein MEI2-like 3
Up-regulated	5	Undisturbed	TraesCS1A02G168300.1	4.26597	0.00845057	putative ripening-related protein 6
Up-regulated	5	Undisturbed	TraesCSU02G087600.1	4.26042	0.00300443	probable glutathione S-transferase GSTU6
Up-regulated	5	Undisturbed	TraesCS7D02G471400.1	4.24586	0.011998	senescence-specific cysteine protease SAG39-like
Up-regulated	5	Undisturbed	TraesCS4A02G034300.1	4.23686	0.000303438	Expansin [Source:UniProtKB/TrEMBL;Acc:A0A1D5XC44]
Up-regulated	5	Undisturbed	TraesCS6B02G026600.1	4.23378	0.0053475	putative ripening-related protein 5
Up-regulated	5	Undisturbed	TraesCS5A02G313900.1	4.23101	0.000545357	Omega-hydroxypalmitate O-feruloyl transferase
Up-regulated	5	Undisturbed	TraesCS4A02G307000.1	4.22809	0.00509294	germin-like protein 9-3
Up-regulated	5	Undisturbed	TraesCS1B02G236800.1	4.21557	0.00321905	senescence-specific cysteine protease SAG39-like
Up-regulated	5	Undisturbed	TraesCS3A02G110600.1	4.2151	0.00482331	citrate-binding protein-like
Up-regulated	5	Undisturbed	TraesCS3A02G110700.1	4.2151	0.00482331	citrate-binding protein-like
Up-regulated	5	Undisturbed	TraesCS2A02G108700.1	4.20967	0.00169967	Peroxidase
Up-regulated	5	Undisturbed	TraesCS6A02G142300.1	4.20461	0.000453481	flotillin-like protein 1
Up-regulated	5	Undisturbed	TraesCS7A02G203300.1	4.202	0.0048312	aspartyl protease family protein At5g10770-like
Up-regulated	5	Undisturbed	TraesCS5A02G041800.3	4.19725	0.0076424	vacuolar fusion protein CCZ1 homolog
Up-regulated	5	Undisturbed	TraesCS3B02G108600.1	4.19464	0.000178058	Xyloglucan endotransglucosylase/hydrolase [Source:UniProtKB/TrEMBL;Acc:W5CT19]
Up-regulated	5	Undisturbed	TraesCS3D02G343700.1	4.18336	0.00461776	acidic endochitinase-like
Up-regulated	5	Undisturbed	TraesCS6B02G380200.1	4.17738	0.00514965	senescence-specific cysteine protease SAG39-like
Up-regulated	5	Undisturbed	TraesCS4A02G301100.1	4.16935	0.00771172	Phosphate transporter [Source:UniProtKB/TrEMBL;Acc:K0J492]
Up-regulated	5	Undisturbed	TraesCS7B02G298400.1	4.16617	0.000364936	Peroxidase
Up-regulated	5	Undisturbed	TraesCS4A02G149500.1	4.15083	0.00255741	intron-binding protein aquarius
Up-regulated	5	Undisturbed	TraesCS4A02G413000.1	4.13603	0.00520381	putative ripening-related protein 5
Up-regulated	5	Undisturbed	TraesCS5B02G393300.2	4.13511	0.00877351	Lysosomal beta glucosidase
Up-regulated	5	Undisturbed	TraesCS6D02G127800.1	4.13408	7.16151e-05	probable glutathione S-transferase GSTU6
Up-regulated	5	Undisturbed	TraesCS3A02G046000.2	4.13012	0.0020614	Bowman-Birk type trypsin inhibitor
Up-regulated	5	Undisturbed	TraesCS7D02G057800.1	4.12833	0.00170898	citrate-binding protein-like
Up-regulated	5	Undisturbed	TraesCS7B02G079500.1	4.11598	0.00400412	12-oxophytodienoate reductase 1-like
Up-regulated	5	Undisturbed	TraesCS1A02G003800.1	4.11359	0.00251113	AAA-ATPase ASD, mitochondrial-like
Up-regulated	5	Undisturbed	TraesCS2B02G067700.1	4.10605	0.00531066	senescence-specific cysteine protease SAG39
Up-regulated	5	Undisturbed	TraesCS3B02G405700.1	4.10222	0.00810245	Acidic endochitinase SE2
Up-regulated	5	Undisturbed	TraesCS3B02G405200.1	4.09764	0.0186898	acidic endochitinase SE2-like
Up-regulated	5	Undisturbed	TraesCS2A02G504400.1	4.06503	0.0112624	subtilisin-like protease SBT1.7
Up-regulated	5	Undisturbed	TraesCS4D02G010900.1	4.05621	0.0277426	TRIae;Pht1;10
Up-regulated	5	Undisturbed	TraesCS3A02G372800.1	4.05262	0.00475556	acidic endochitinase SE2-like
Up-regulated	5	Undisturbed	TraesCS3A02G110500.1	4.05021	0.0102329	citrate-binding protein-like
Up-regulated	5	Undisturbed	TraesCS3D02G075100.1	4.04945	0.0188547	putative ripening-related protein 6
Up-regulated	5	Undisturbed	TraesCS4B02G390200.1	4.04665	0.00998558	ervatamin-B-like
Up-regulated	5	Undisturbed	TraesCS7A02G118900.2	4.03802	0.0493106	ABC transporter C family member 10
Up-regulated	5	Undisturbed	TraesCS6B02G293200.1	4.03646	0.0157058	oligopeptide transporter 4-like
Up-regulated	5	Undisturbed	TraesCS1A02G186600.1	4.03244	0.00189576	putative glutathione S-transferase GSTU6
Up-regulated	5	Undisturbed	TraesCS3D02G379200.1	4.02787	0.00581048	beta-galactosidase 3-like
Up-regulated	5	Undisturbed	TraesCS2B02G500200.1	4.0255	0.0208247	pathogenesis-related protein 1-like
Up-regulated	5	Undisturbed	TraesCS6D02G199500.1	4.02202	0.0107074	chitinase 6-like
Up-regulated	5	Undisturbed	TraesCS2A02G477000.1	4.02116	0.0065102	pathogenesis-related protein 1-like
Up-regulated	5	Undisturbed	TraesCS4B02G313500.1	4.01281	0.0195001	putative ripening-related protein 5
Up-regulated	5	Undisturbed	TraesCS3A02G381700.1	3.99687	0.00135369	Ammonium transporter [Source:UniProtKB/TrEMBL;Acc:A0A341S126]
Up-regulated	5	Undisturbed	TraesCS7B02G121600.1	3.99527	0.00065237	probable inactive receptor kinase RLK902
Up-regulated	5	Undisturbed	TraesCS1A02G167000.1	3.99129	0.00627075	putative ripening-related protein 4
Up-regulated	5	Undisturbed	TraesCS4A02G274200.2	3.97991	0.0490451	Phosphatidylinositol 4-phosphate 5-kinase [Source:UniProtKB/TrEMBL;Acc:W5DMI7]
Up-regulated	5	Undisturbed	TraesCS4B02G039900.1	3.97835	0.00520312	senescence-specific cysteine protease SAG39-like
Up-regulated	5	Undisturbed	TraesCS1D02G403100.1	3.97017	0.00671437	premnaspirodiene oxygenase-like
Up-regulated	5	Undisturbed	TraesCS3A02G075200.1	3.96791	0.0331864	putative ripening-related protein 6
Up-regulated	5	Undisturbed	TraesCS6B02G351600.1	3.96426	0.0315091	Protein SRG1
Up-regulated	5	Undisturbed	TraesCS2B02G177400.1	3.96109	0.0067661	cytochrome P450 709B2-like
Up-regulated	5	Undisturbed	TraesCS3B02G352100.1	3.94561	0.0086258	unnamed protein product
Up-regulated	5	Undisturbed	TraesCS6B02G401200.1	3.94077	0.000885018	uncharacterized protein LOC109755532
Up-regulated	5	Undisturbed	TraesCS7D02G057900.1	3.93485	0.00471762	citrate-binding protein-like
Up-regulated	5	Undisturbed	TraesCS5B02G242600.2	3.93411	0.0126567	serine carboxypeptidase 2-like
Up-regulated	5	Undisturbed	TraesCS7D02G223400.1	3.93342	0.0310224	aspartyl protease family protein At5g10770-like
Up-regulated	5	Undisturbed	TraesCS6D02G329600.1	3.92862	0.00930842	senescence-specific cysteine protease SAG39-like
Up-regulated	5	Undisturbed	TraesCS4B02G039800.1	3.92247	0.00188315	senescence-specific cysteine protease SAG39-like
Up-regulated	5	Undisturbed	TraesCS3A02G373200.1	3.92102	0.00397107	Acidic endochitinase
Up-regulated	5	Undisturbed	TraesCS6B02G244400.1	3.91764	0.00292721	protein FLOWERING LOCUS T-like
Up-regulated	5	Undisturbed	TraesCS5D02G440300.1	3.91509	0.00421699	putative ripening-related protein 4
Up-regulated	5	Undisturbed	TraesCS6A02G216100.1	3.91491	0.0095759	chitinase 6-like
Up-regulated	5	Undisturbed	TraesCSU02G143100.1	3.9149	0.0112951	senescence-specific cysteine protease SAG39
Up-regulated	5	Undisturbed	TraesCS5A02G245000.1	3.90863	0.00509816	serine carboxypeptidase 2-like
Up-regulated	5	Undisturbed	TraesCS2D02G268300.1	3.89658	0.00546491	Lipase [Source:UniProtKB/TrEMBL;Acc:A0A1D5UJB7]
Up-regulated	5	Undisturbed	TraesCS5B02G376800.1	3.89191	0.00193608	probable glutathione S-transferase GSTU1
Up-regulated	5	Undisturbed	TraesCS5D02G470800.1	3.88708	0.0185511	GDSL esterase/lipase At5g55050-like
Up-regulated	5	Undisturbed	TraesCS4D02G302700.1	3.88587	0.0112344	transcription factor bHLH96-like
Up-regulated	5	Undisturbed	TraesCS5D02G239600.1	3.88045	0.0162773	protein FEZ-like
Up-regulated	5	Undisturbed	TraesCS3A02G381600.1	3.87972	0.00392197	Ammonium transporter
Up-regulated	5	Undisturbed	TraesCS7A02G218700.1	3.87707	0.0250908	aspartyl protease family protein At5g10770-like
Up-regulated	5	Undisturbed	TraesCS6B02G070400.1	3.87144	0.000384549	disease resistance protein RGA2-like
Up-regulated	5	Undisturbed	TraesCS6D02G328100.1	3.85877	0.00297182	senescence-specific cysteine protease SAG39-like
Up-regulated	5	Undisturbed	TraesCS6B02G379200.1	3.85812	0.0359277	senescence-specific cysteine protease SAG39
Up-regulated	5	Undisturbed	TraesCS3B02G607000.1	3.85499	0.0310765	aspartic proteinase nepenthesin-1-like
Up-regulated	5	Undisturbed	TraesCS6B02G379300.1	3.8478	0.000412411	senescence-specific cysteine protease SAG39-like
Up-regulated	5	Undisturbed	TraesCS2D02G201900.1	3.84749	0.0262923	beta-hexosaminidase 2-like
Up-regulated	5	Undisturbed	TraesCS3D02G492100.1	3.8472	3.90842e-05	Carbon catabolite-derepressing protein kinase
Up-regulated	5	Undisturbed	TraesCS3D02G545800.1	3.84501	0.0231981	aspartic proteinase nepenthesin-1-like
Up-regulated	5	Undisturbed	TraesCSU02G264200.1	3.84287	0.0108455	senescence-specific cysteine protease SAG39
Up-regulated	5	Undisturbed	TraesCS2A02G556700.1	3.84009	1.7358e-05	Acyl-[acyl-carrier-protein] hydrolase [Source:UniProtKB/TrEMBL;Acc:A0A341QDA2]
Up-regulated	5	Undisturbed	TraesCS7D02G223700.1	3.83651	0.0231311	aspartyl protease family protein At5g10770-like
Up-regulated	5	Undisturbed	TraesCS2D02G505100.1	3.83334	0.000895859	subtilisin-like protease SBT1.2
Up-regulated	5	Undisturbed	TraesCS5D02G251600.1	3.82777	0.0135207	serine carboxypeptidase-like 40
Up-regulated	5	Undisturbed	TraesCS3B02G382300.1	3.82542	0.000784703	acidic endochitinase-like
Up-regulated	5	Undisturbed	TraesCS7B02G298500.1	3.82355	0.000524678	Peroxidase [Source:UniProtKB/TrEMBL;Acc:A0A1D6C4L8]
Up-regulated	5	Undisturbed	TraesCS3B02G471600.1	3.81772	0.0152451	putative glutathione S-transferase GSTU6
Up-regulated	5	Undisturbed	TraesCS6D02G022600.1	3.80693	0.0211094	putative ripening-related protein 5
Up-regulated	5	Undisturbed	TraesCS7D02G367800.1	3.80341	0.011338	aquaporin NIP1-4-like
Up-regulated	5	Undisturbed	TraesCS4B02G376400.1	3.80232	0.00154181	Plasma membrane ATPase [Source:UniProtKB/TrEMBL;Acc:A0A1D5XH89]
Up-regulated	5	Undisturbed	TraesCS6A02G345600.1	3.79552	0.0401196	senescence-specific cysteine protease SAG39-like
Up-regulated	5	Undisturbed	TraesCS6D02G069900.1	3.79383	0.00546491	Carboxypeptidase [Source:UniProtKB/TrEMBL;Acc:A0A1D6DJY9]
Up-regulated	5	Undisturbed	TraesCS2A02G154300.1	3.79217	0.000887284	probable serine/threonine-protein kinase At1g01540
Up-regulated	5	Undisturbed	TraesCS2D02G500900.1	3.78964	0.00837005	receptor-like protein kinase
Up-regulated	5	Undisturbed	TraesCS6B02G096300.1	3.78556	0.0177344	ABC transporter G family member 42
Up-regulated	5	Undisturbed	TraesCS3A02G047100.1	3.78236	0.00811097	aspartyl protease family protein At5g10770-like
Up-regulated	5	Undisturbed	TraesCS2A02G355300.1	3.78051	0.00329954	Peroxidase [Source:UniProtKB/TrEMBL;Acc:A0A1D5TCL9]
Up-regulated	5	Undisturbed	TraesCS1D02G042800.1	3.77823	0.0126567	putative germin-like protein 9-2
Up-regulated	5	Undisturbed	TraesCS1D02G173900.1	3.7769	5.37311e-05	putative ripening-related protein 4
Up-regulated	5	Undisturbed	TraesCS3B02G350300.1	3.77689	0.00880145	1-aminocyclopropane-1-carboxylate oxidase homolog 11-like
Up-regulated	5	Undisturbed	TraesCS6D02G127700.1	3.77458	0.000774277	probable glutathione S-transferase GSTU6
Up-regulated	5	Undisturbed	TraesCS5D02G250400.1	3.7632	0.00412319	putative serine carboxypeptidase-like 23
Up-regulated	5	Undisturbed	TraesCS5B02G565600.1	3.76319	0.00962582	hypothetical protein TRIUR3_04815
Up-regulated	5	Undisturbed	TraesCS2B02G177300.1	3.75432	0.0434885	cytochrome P450
Up-regulated	5	Undisturbed	TraesCS4A02G339200.1	3.74799	0.0175363	Expansin [Source:UniProtKB/TrEMBL;Acc:A0A1D5X916]
Up-regulated	5	Undisturbed	TraesCS1D02G087700.1	3.73931	0.0246656	serine carboxypeptidase 2-like
Up-regulated	5	Undisturbed	TraesCSU02G171200.1	3.73562	0.0244933	senescence-specific cysteine protease SAG39
Up-regulated	5	Undisturbed	TraesCS5D02G415600.1	3.72944	0.00229983	chitinase 2-like
Up-regulated	5	Undisturbed	TraesCS1D02G054300.1	3.72699	0.00509816	CASP-like protein [Source:UniProtKB/TrEMBL;Acc:A0A341PCF4]
Up-regulated	5	Undisturbed	TraesCS7B02G128500.1	3.72176	0.0092875	aspartyl protease family protein At5g10770-like
Up-regulated	5	Undisturbed	TraesCS4B02G225700.1	3.71008	0.000676317	uncharacterized protein LOC109783621
Up-regulated	5	Undisturbed	TraesCS2A02G278500.1	3.70272	0.0430224	Protein DETOXIFICATION [Source:UniProtKB/TrEMBL;Acc:A0A341QC71]
Up-regulated	5	Undisturbed	TraesCS5A02G460500.1	3.69996	0.0152553	GDSL esterase/lipase At5g55050-like
Up-regulated	5	Undisturbed	TraesCS4B02G364600.1	3.69434	0.00050276	uncharacterized protein LOC109762619
Up-regulated	5	Undisturbed	TraesCS4A02G231600.1	3.69423	0.0112462	uncharacterized protein LOC109768916
Up-regulated	5	Undisturbed	TraesCS6A02G296500.1	3.69416	0.000437241	Caleosin [Source:UniProtKB/TrEMBL;Acc:A0A096UTL6]
Up-regulated	5	Undisturbed	TraesCS4D02G200700.1	3.69021	0.0184968	Putative In2.1 protein [Source:UniProtKB/TrEMBL;Acc:O82071]
Up-regulated	5	Undisturbed	TraesCS2A02G038800.1	3.68388	0.000424093	uncharacterized protein LOC109759722
Up-regulated	5	Undisturbed	TraesCS3D02G254600.1	3.68241	0.0209723	ABC transporter G family member 17-like
Up-regulated	5	Undisturbed	TraesCS5B02G200600.2	3.67972	0.0270356	Phospholipase D [Source:UniProtKB/TrEMBL;Acc:A0A341VUR5]
Up-regulated	5	Undisturbed	TraesCS4A02G052300.1	3.67726	0.00312005	uncharacterized protein LOC109753216
Up-regulated	5	Undisturbed	TraesCS3D02G366400.1	3.67566	0.013224	Acidic endochitinase
Up-regulated	5	Undisturbed	TraesCS4D02G256100.1	3.6591	0.00021058	uncharacterized protein LOC109731528
Up-regulated	5	Undisturbed	TraesCS2A02G185800.1	3.64692	0.0197751	Beta-hexosaminidase [Source:UniProtKB/TrEMBL;Acc:A0A1D5TPG5]
Up-regulated	5	Undisturbed	TraesCS1B02G125700.1	3.64329	0.00539965	CCR4-NOT transcription complex subunit 1-like
Up-regulated	5	Undisturbed	TraesCS6D02G276800.1	3.6425	0.00389357	protein SAR DEFICIENT 1-like
Up-regulated	5	Undisturbed	TraesCS5A02G129100.1	3.63291	0.00673626	Purple acid phosphatase [Source:UniProtKB/TrEMBL;Acc:A0A1D5YM25]
Up-regulated	5	Undisturbed	TraesCS4B02G008800.1	3.63227	0.00856623	germin-like protein 9-3
Up-regulated	5	Undisturbed	TraesCS6D02G248700.1	3.63016	0.00839329	oligopeptide transporter 4-like
Up-regulated	5	Undisturbed	TraesCS2D02G108600.1	3.62251	3.78627e-07	Peroxidase
Up-regulated	5	Undisturbed	TraesCS6D02G273000.1	3.61901	0.0495508	cytochrome P450 72A15-like
Up-regulated	5	Undisturbed	TraesCS2A02G219900.1	3.61389	0.00216537	uncharacterized protein LOC109746734
Up-regulated	5	Undisturbed	TraesCS5B02G132900.2	3.60987	0.00672207	two-component response regulator ORR9-like
Up-regulated	5	Undisturbed	TraesCS1A02G210000.1	3.60902	0.00342565	14 kDa proline-rich protein DC2.15-like
Up-regulated	5	Undisturbed	TraesCS6A02G071800.1	3.59782	0.00535139	Carboxypeptidase [Source:UniProtKB/TrEMBL;Acc:W5GEH0]
Up-regulated	5	Undisturbed	TraesCS4B02G013200.1	3.59188	0.0124321	phosphate transporter
Up-regulated	5	Undisturbed	TraesCS5A02G537100.1	3.57926	0.000690544	protein NRT1/ PTR FAMILY 6.3-like
Up-regulated	5	Undisturbed	TraesCS4A02G466700.1	3.57387	0.00048334	DELLA protein
Up-regulated	5	Undisturbed	TraesCS7A02G553000.1	3.57377	0.0296806	aquaporin NIP1-3-like
Up-regulated	5	Undisturbed	TraesCS6B02G167600.1	3.56948	0.000334384	probable glutathione S-transferase GSTU6
Up-regulated	5	Undisturbed	TraesCS1B02G147000.1	3.56676	0.00803556	proline-rich receptor-like protein kinase PERK1
Up-regulated	5	Undisturbed	TraesCSU02G070600.1	3.5661	0.0236129	germin-like protein 9-3
Up-regulated	5	Undisturbed	TraesCS2D02G011000.1	3.56562	0.00346383	putative F-box/LRR-repeat protein 23
Up-regulated	5	Undisturbed	TraesCS2A02G144900.1	3.56438	0.000975612	Peroxidase [Source:UniProtKB/TrEMBL;Acc:A0A1D5TQI9]
Up-regulated	5	Undisturbed	TraesCS5D02G250900.1	3.5574	0.0252427	putative serine carboxypeptidase-like 23
Up-regulated	5	Undisturbed	TraesCS7A02G218900.1	3.55483	0.0304619	aspartyl protease family protein At5g10770-like
Up-regulated	5	Undisturbed	TraesCS1D02G088800.2	3.54747	0.0098819	Alpha-mannosidase [Source:UniProtKB/TrEMBL;Acc:A0A341PG27]
Up-regulated	5	Undisturbed	TraesCS6B02G246800.1	3.54714	0.0119019	chitinase 6-like
Up-regulated	5	Undisturbed	TraesCS3A02G386200.1	3.54698	0.0115237	beta-galactosidase 3-like
Up-regulated	5	Undisturbed	TraesCS3A02G044100.1	3.54117	0.0272624	Nuclease S1
Up-regulated	5	Undisturbed	TraesCS7D02G175900.2	3.54111	0.0284978	12-oxophytodienoate reductase 1-like
Up-regulated	5	Undisturbed	TraesCS2D02G551000.1	3.53707	0.0151036	unnamed protein product
Up-regulated	5	Undisturbed	TraesCS7B02G318800.1	3.53259	8.45168e-05	group II HKT transporter
Up-regulated	5	Undisturbed	TraesCS3A02G373600.1	3.52497	0.0077899	Acidic endochitinase
Up-regulated	5	Undisturbed	TraesCS5A02G397800.1	3.51573	0.00509816	isoflavone 2'-hydroxylase-like
Up-regulated	5	Undisturbed	TraesCS7A02G355000.1	3.51534	0.0286142	aquaporin NIP1-4-like
Up-regulated	5	Undisturbed	TraesCS1D02G362500.1	3.51506	0.0193561	ethylene-responsive transcription factor WRI1
Up-regulated	5	Undisturbed	TraesCS5B02G203200.1	3.51223	0.0172662	ABC transporter G family member 17-like
Up-regulated	5	Undisturbed	TraesCS5D02G384400.1	3.50771	0.00292721	probable glutathione S-transferase GSTU1
Up-regulated	5	Undisturbed	TraesCS7D02G205800.1	3.50624	0.0293479	citrate-binding protein-like
Up-regulated	5	Undisturbed	TraesCS2B02G321500.2	3.50281	0.0154762	uncharacterized protein LOC109759476
Up-regulated	5	Undisturbed	TraesCS2D02G112300.1	3.50141	0.000965236	universal stress protein PHOS34-like
Up-regulated	5	Undisturbed	TraesCS5D02G472200.1	3.49783	0.0207586	GDSL esterase/lipase At5g55050-like
Up-regulated	5	Undisturbed	TraesCS5B02G319300.2	3.49253	0.0396763	subtilisin-like protease SBT3.6
Up-regulated	5	Undisturbed	TraesCS5A02G209300.1	3.49159	0.00786717	Secretory carrier-associated membrane protein [Source:UniProtKB/TrEMBL;Acc:A0A341UXK0]
Up-regulated	5	Undisturbed	TraesCS5B02G242200.1	3.4906	0.000564975	putative serine carboxypeptidase-like 23
Up-regulated	5	Undisturbed	TraesCS7D02G057700.1	3.48667	0.0366418	citrate-binding protein-like
Up-regulated	5	Undisturbed	TraesCS2B02G145500.1	3.48582	2.45383e-06	berberine bridge enzyme-like 18
Up-regulated	5	Undisturbed	TraesCS5D02G250800.1	3.48549	0.0268945	Carboxypeptidase
Up-regulated	5	Undisturbed	TraesCS5A02G543300.1	3.48017	0.000961749	Plasma membrane ATPase [Source:UniProtKB/TrEMBL;Acc:A0A1D5YJR3]
Up-regulated	5	Undisturbed	TraesCS2B02G587000.1	3.47889	0.0143403	Acyl-[acyl-carrier-protein] hydrolase [Source:UniProtKB/TrEMBL;Acc:A0A341QZD8]
Up-regulated	5	Undisturbed	TraesCS7B02G109300.1	3.47784	0.021065	citrate-binding protein-like
Up-regulated	5	Undisturbed	TraesCS2B02G232900.1	3.47254	0.00298225	sugar carrier protein C-like
Up-regulated	5	Undisturbed	TraesCS3B02G285600.1	3.47214	0.00546491	ABC transporter G family member 17-like
Up-regulated	5	Undisturbed	TraesCS4A02G338900.1	3.46901	0.0138762	RING-H2 finger protein ATL65-like
Up-regulated	5	Undisturbed	TraesCS5A02G228000.1	3.46668	0.00735194	Protein FEZ
Up-regulated	5	Undisturbed	TraesCS2A02G476500.1	3.46522	0.00824677	pathogenesis-related protein 1-like
Up-regulated	5	Undisturbed	TraesCS5B02G241700.1	3.46285	0.00745969	putative serine carboxypeptidase-like 23
Up-regulated	5	Undisturbed	TraesCS1D02G080100.1	3.4572	0.00471762	Peroxidase [Source:UniProtKB/TrEMBL;Acc:W5AM82]
Up-regulated	5	Undisturbed	TraesCS4B02G380100.1	3.45516	0.000223124	protein C2-DOMAIN ABA-RELATED 8-like
Up-regulated	5	Undisturbed	TraesCS2D02G107500.1	3.45083	0.00531159	Peroxidase [Source:UniProtKB/TrEMBL;Acc:A0A341R621]
Up-regulated	5	Undisturbed	TraesCS1A02G052500.1	3.43658	0.00769933	CASP-like protein [Source:UniProtKB/TrEMBL;Acc:W4ZVU6]
Up-regulated	5	Undisturbed	TraesCS2A02G367600.1	3.43618	0.00831819	clavaminate synthase-like protein At3g21360
Up-regulated	5	Undisturbed	TraesCS5D02G499000.1	3.42986	0.031794	DNA-directed RNA polymerase subunit [Source:UniProtKB/TrEMBL;Acc:A0A341W7C3]
Up-regulated	5	Undisturbed	TraesCS7A02G488800.1	3.42232	0.030767	pollen receptor-like kinase 4
Up-regulated	5	Undisturbed	TraesCS4A02G319900.1	3.41595	0.00239997	Acyl carrier protein [Source:UniProtKB/TrEMBL;Acc:W5DSF8]
Up-regulated	5	Undisturbed	TraesCS4B02G313300.1	3.41572	0.00725616	cortical cell-delineating protein-like
Up-regulated	5	Undisturbed	TraesCS5A02G556900.1	3.41481	0.00059081	cytochrome P450 87A3
Up-regulated	5	Undisturbed	TraesCS4B02G265200.1	3.4117	0.0370209	cytochrome b561 and DOMON domain-containing protein At3g59070-like
Up-regulated	5	Undisturbed	TraesCS7A02G063000.1	3.40314	0.0193561	citrate-binding protein-like
Up-regulated	5	Undisturbed	TraesCSU02G229000.1	3.3956	0.0319687	putative ripening-related protein 4
Up-regulated	5	Undisturbed	TraesCS2D02G503600.1	3.38505	0.016779	uncharacterized protein LOC109747355
Up-regulated	5	Undisturbed	TraesCS4D02G127800.1	3.38407	0.0225812	scarecrow-like protein 3
Up-regulated	5	Undisturbed	TraesCSU02G253900.1	3.38134	0.0463299	acetylserotonin O-methyltransferase 3-like
Up-regulated	5	Undisturbed	TraesCS5B02G148300.1	3.3745	0.0354157	Glycosyltransferase [Source:UniProtKB/TrEMBL;Acc:T1QDI5]
Up-regulated	5	Undisturbed	TraesCS5B02G242100.1	3.37126	0.0194866	Carboxypeptidase [Source:UniProtKB/TrEMBL;Acc:A0A341VDP8]
Up-regulated	5	Undisturbed	TraesCS7B02G084600.1	3.3709	0.000564017	probable RNA-binding protein ARP1
Up-regulated	5	Undisturbed	TraesCS6D02G080500.1	3.36574	0.000817604	protein SAR DEFICIENT 1-like
Up-regulated	5	Undisturbed	TraesCS3D02G316600.1	3.36332	0.0337772	hypothetical protein TRIUR3_34483
Up-regulated	5	Undisturbed	TraesCS2B02G418700.1	3.36287	0.0307765	cytochrome P450 87A3
Up-regulated	5	Undisturbed	TraesCS7D02G216400.1	3.36207	0.0228931	probable inactive receptor kinase RLK902
Up-regulated	5	Undisturbed	TraesCS2B02G450000.1	3.34988	0.0238085	ent-kaur-16-ene synthase, chloroplastic-like
Up-regulated	5	Undisturbed	TraesCS2D02G364400.1	3.34683	0.000812492	clavaminate synthase-like protein At3g21360
Up-regulated	5	Undisturbed	TraesCS5A02G004400.1	3.33972	0.0173971	protein NRT1/ PTR FAMILY 2.11-like
Up-regulated	5	Undisturbed	TraesCS2A02G161000.1	3.33897	0.000146487	Trehalose 6-phosphate phosphatase [Source:UniProtKB/TrEMBL;Acc:A0A1D5TQB7]
Up-regulated	5	Undisturbed	TraesCS3D02G257500.1	3.33622	0.0241072	ABC transporter B family member 4-like
Up-regulated	5	Undisturbed	TraesCS2A02G451500.1	3.33582	0.0133415	putative ABC transporter C family member 15
Up-regulated	5	Undisturbed	TraesCS2A02G476900.1	3.33549	0.0092875	pathogenesis-related protein 1-like
Up-regulated	5	Undisturbed	TraesCS3B02G282500.1	3.3308	0.0188807	Oxalate oxidase 2
Up-regulated	5	Undisturbed	TraesCS2B02G613000.1	3.32389	0.000113569	leucoanthocyanidin dioxygenase-like
Up-regulated	5	Undisturbed	TraesCS4D02G085100.1	3.32308	0.00850885	heparan-alpha-glucosaminide N-acetyltransferase-like
Up-regulated	5	Undisturbed	TraesCSU02G246000.1	3.31952	0.0317639	acetylserotonin O-methyltransferase 3-like
Up-regulated	5	Undisturbed	TraesCS7B02G292000.1	3.31484	0.0378944	senescence-specific cysteine protease SAG39
Up-regulated	5	Undisturbed	TraesCS7D02G345000.1	3.31386	0.000811163	Laccase [Source:UniProtKB/TrEMBL;Acc:A0A1D6CVK5]
Up-regulated	5	Undisturbed	TraesCS5D02G251000.1	3.31304	0.00426393	putative serine carboxypeptidase-like 23
Up-regulated	5	Undisturbed	TraesCS5D02G163600.1	3.31171	0.0146291	ABC transporter G family member 41-like
Up-regulated	5	Undisturbed	TraesCS1D02G302900.1	3.30775	0.00042254	Patatin [Source:UniProtKB/TrEMBL;Acc:W5AF95]
Up-regulated	5	Undisturbed	TraesCS1D02G303500.1	3.30672	0.0217212	protein SCARECROW-like
Up-regulated	5	Undisturbed	TraesCS5D02G314100.1	3.30604	0.0272523	serine carboxypeptidase-like 2
Up-regulated	5	Undisturbed	TraesCS2A02G127700.1	3.29357	0.0366634	benzyl alcohol O-benzoyltransferase-like
Up-regulated	5	Undisturbed	TraesCS3A02G408200.1	3.29012	0.0442202	Bidirectional sugar transporter SWEET [Source:UniProtKB/TrEMBL;Acc:A0A1D5VCJ6]
Up-regulated	5	Undisturbed	TraesCS5B02G004900.1	3.2873	0.0233311	N/A
Up-regulated	5	Undisturbed	TraesCS2B02G200100.1	3.28517	0.0277159	Sulfotransferase [Source:UniProtKB/TrEMBL;Acc:A0A1D6RNC0]
Up-regulated	5	Undisturbed	TraesCS7D02G224300.1	3.2847	0.0135707	aspartyl protease family protein At5g10770-like
Up-regulated	5	Undisturbed	TraesCS2A02G414100.1	3.27869	0.00537877	Aquaporin TIP2-3
Up-regulated	5	Undisturbed	TraesCS5A02G244300.1	3.27804	0.0104298	putative serine carboxypeptidase-like 23
Up-regulated	5	Undisturbed	TraesCS2A02G147800.1	3.27659	0.00327628	Peroxidase [Source:UniProtKB/TrEMBL;Acc:W5B033]
Up-regulated	5	Undisturbed	TraesCS6B02G167300.1	3.273	0.00777368	probable glutathione S-transferase GSTU6
Up-regulated	5	Undisturbed	TraesCS2D02G068700.1	3.27159	0.00606598	2-alkenal reductase (NADP(+)-dependent)-like
Up-regulated	5	Undisturbed	TraesCS2A02G408400.1	3.26041	0.0370985	subtilisin-like protease SBT1.5
Up-regulated	5	Undisturbed	TraesCS3B02G418300.1	3.25873	0.0180539	beta-galactosidase 3-like
Up-regulated	5	Undisturbed	TraesCS3A02G146300.1	3.25714	0.00973004	uncharacterized protein LOC109753521
Up-regulated	5	Undisturbed	TraesCS5A02G415300.1	3.25673	0.0144586	Early nodulin-like protein 1
Up-regulated	5	Undisturbed	TraesCS5B02G279400.1	3.25425	0.00132407	short-chain dehydrogenase TIC 32, chloroplastic-like
Up-regulated	5	Undisturbed	TraesCS1B02G244800.1	3.24253	0.0415044	beta-glucosidase 22-like
Up-regulated	5	Undisturbed	TraesCS5D02G528600.1	3.24111	0.0182946	tricetin 3',4',5'-O-trimethyltransferase-like
Up-regulated	5	Undisturbed	TraesCS7A02G095100.1	3.24099	0.00509294	AP2-like ethylene-responsive transcription factor At1g16060
Up-regulated	5	Undisturbed	TraesCS7B02G070700.1	3.24081	0.00480479	hypothetical protein BRADI_1g46405v3
Up-regulated	5	Undisturbed	TraesCS7D02G280800.2	3.23418	0.00336753	ubiquitin carboxyl-terminal hydrolase 19-like
Up-regulated	5	Undisturbed	TraesCS1A02G087500.2	3.23088	0.0434436	Alpha-mannosidase [Source:UniProtKB/TrEMBL;Acc:A0A341NJP7]
Up-regulated	5	Undisturbed	TraesCS7A02G418600.1	3.23058	0.00161841	group II HKT transporter
Up-regulated	5	Undisturbed	TraesCS6B02G143400.1	3.22541	0.00942061	auxin-induced protein 15A-like
Up-regulated	5	Undisturbed	TraesCS3D02G396400.1	3.22076	0.0125624	Beta-hexosaminidase
Up-regulated	5	Undisturbed	TraesCS5B02G541300.1	3.18874	0.0149574	subtilisin-like protease SBT3.6
Up-regulated	5	Undisturbed	TraesCS7D02G475200.1	3.18865	3.78062e-05	pollen receptor-like kinase 4
Up-regulated	5	Undisturbed	TraesCSU02G154800.1	3.18516	0.0409029	uncharacterized protein LOC109760850
Up-regulated	5	Undisturbed	TraesCS7B02G375600.1	3.18272	0.0126567	Peroxidase
Up-regulated	5	Undisturbed	TraesCS5A02G235300.3	3.18238	0.02162	Hexosyltransferase [Source:UniProtKB/TrEMBL;Acc:A0A1D5YGB8]
Up-regulated	5	Undisturbed	TraesCS6D02G115900.1	3.17955	0.00317447	tyrosine-sulfated glycopeptide receptor 1-like
Up-regulated	5	Undisturbed	TraesCS5B02G043700.1	3.17575	0.0234046	peptide-N4-(N-acetyl-beta-glucosaminyl)asparagine amidase A-like
Up-regulated	5	Undisturbed	TraesCS6A02G296600.1	3.16772	0.0270045	protein SAR DEFICIENT 1-like
Up-regulated	5	Undisturbed	TraesCS3D02G162400.1	3.16438	0.0349845	RING-type E3 ubiquitin transferase [Source:UniProtKB/TrEMBL;Acc:A0A341T8C7]
Up-regulated	5	Undisturbed	TraesCS7A02G166000.1	3.16102	0.00423043	Subtilisin inhibitor 1
Up-regulated	5	Undisturbed	TraesCS5A02G374800.1	3.16058	0.00136061	probable glutathione S-transferase GSTU1
Up-regulated	5	Undisturbed	TraesCS7A02G281200.1	3.15879	0.00573863	serine carboxypeptidase-like 51
Up-regulated	5	Undisturbed	TraesCS1A02G196100.1	3.15418	0.0414557	cellulose synthase-like protein D1
Up-regulated	5	Undisturbed	TraesCS4D02G270400.1	3.13076	0.0348214	Expansin [Source:UniProtKB/TrEMBL;Acc:A0A1D5XYT3]
Up-regulated	5	Undisturbed	TraesCS4D02G358200.1	3.12119	0.0118804	hypothetical protein TRIUR3_07271
Up-regulated	5	Undisturbed	TraesCS6A02G237200.2	3.11777	0.00836443	hypothetical protein
Up-regulated	5	Undisturbed	TraesCS7A02G424100.1	3.11647	0.00251394	Peroxidase
Up-regulated	5	Undisturbed	TraesCS5B02G132500.1	3.11564	0.0412952	uncharacterized protein LOC109782960
Up-regulated	5	Undisturbed	TraesCS5A02G185300.1	3.11519	0.038334	clavaminate synthase-like protein At3g21360
Up-regulated	5	Undisturbed	TraesCS5A02G205100.1	3.11479	0.00239997	ABC transporter G family member 17-like
Up-regulated	5	Undisturbed	TraesCS5D02G299200.1	3.11345	0.0370985	uncharacterized protein LOC109744522
Up-regulated	5	Undisturbed	TraesCS4A02G005100.4	3.11289	0.00215812	protein STRUBBELIG-RECEPTOR FAMILY 6-like
Up-regulated	5	Undisturbed	TraesCS5D02G133000.1	3.1077	0.0430224	aspartyl protease family protein At5g10770-like
Up-regulated	5	Undisturbed	TraesCS2A02G063300.1	3.10678	0.00502968	protein FEZ-like
Up-regulated	5	Undisturbed	TraesCS2B02G385000.1	3.10657	0.00331136	clavaminate synthase-like protein At3g21360
Up-regulated	5	Undisturbed	TraesCS1D02G313100.1	3.10631	0.0222534	basic blue protein-like
Up-regulated	5	Undisturbed	TraesCS7B02G129200.1	3.10269	0.0419972	aspartyl protease family protein At5g10770-like
Up-regulated	5	Undisturbed	TraesCS7B02G179900.1	3.10239	3.78701e-05	Carboxypeptidase [Source:UniProtKB/TrEMBL;Acc:A0A1D6CHP0]
Up-regulated	5	Undisturbed	TraesCS3D02G369600.1	3.10151	0.00305393	probable glutathione S-transferase GSTU1
Up-regulated	5	Undisturbed	TraesCS2B02G426900.1	3.09955	0.0345748	subtilisin-like protease SBT1.7
Up-regulated	5	Undisturbed	TraesCS1A02G357800.1	3.0992	0.00725468	ethylene-responsive transcription factor WRI1
Up-regulated	5	Undisturbed	TraesCS5B02G382300.1	3.09493	0.0456209	Lipoxygenase [Source:UniProtKB/TrEMBL;Acc:A0A341VLQ6]
Up-regulated	5	Undisturbed	TraesCS3B02G418600.1	3.08735	0.0348924	unnamed protein product
Up-regulated	5	Undisturbed	TraesCS5B02G244000.1	3.08399	0.0172523	GLABRA2 expression modulator-like
Up-regulated	5	Undisturbed	TraesCS4A02G408200.3	3.08328	0.0498442	xyloglucan galactosyltransferase KATAMARI1
Up-regulated	5	Undisturbed	TraesCS7A02G358500.3	3.08203	0.00128731	cell division cycle and apoptosis regulator protein 1-like
Up-regulated	5	Undisturbed	TraesCS5D02G061200.1	3.07613	0.0467205	vacuolar-sorting receptor 1-like
Up-regulated	5	Undisturbed	TraesCS2D02G438000.1	3.06551	0.00434171	unnamed protein product
Up-regulated	5	Undisturbed	TraesCS4A02G228300.1	3.0633	0.00531066	heparan-alpha-glucosaminide N-acetyltransferase-like
Up-regulated	5	Undisturbed	TraesCS5B02G563700.3	3.05375	0.0171823	Mediator of RNA polymerase II transcription subunit 13 [Source:UniProtKB/TrEMBL;Acc:A0A1D5Z6C6]
Up-regulated	5	Undisturbed	TraesCS2D02G214500.1	3.03992	0.00397954	equilibrative nucleotide transporter 3-like
Up-regulated	5	Undisturbed	TraesCS5A02G508500.1	3.03747	0.0473117	Peptide transporter PTR3-A
Up-regulated	5	Undisturbed	TraesCS2A02G577300.1	3.03012	0.0079963	serine/threonine-protein kinase STY8-like
Up-regulated	5	Undisturbed	TraesCS3B02G290300.1	3.02448	0.0137337	ABC transporter B family member 4-like
Up-regulated	5	Undisturbed	TraesCS4B02G390100.1	3.02427	0.0419598	ervatamin-B-like
Up-regulated	5	Undisturbed	TraesCS3A02G138500.1	3.02391	0.0102249	serine carboxypeptidase 2-like
Up-regulated	5	Undisturbed	TraesCS3A02G239300.2	3.02176	0.0026622	Pyruvate kinase [Source:UniProtKB/TrEMBL;Acc:A0A1D5V7B0]
Up-regulated	5	Undisturbed	TraesCS7B02G392000.1	3.02172	0.0268945	pollen receptor-like kinase 4
Up-regulated	5	Undisturbed	TraesCS2D02G358200.1	3.02086	0.00892463	unnamed protein product
Up-regulated	5	Undisturbed	TraesCS2A02G500700.1	3.0181	0.0354113	receptor-like protein kinase
Up-regulated	5	Undisturbed	TraesCS7B02G059100.1	3.01755	0.0421411	cytochrome P450 709B1-like
Up-regulated	5	Undisturbed	TraesCS6D02G162700.1	3.01248	0.0212516	Glycosyltransferase
Up-regulated	5	Undisturbed	TraesCS1B02G041100.1	3.01186	0.0405707	probable inactive methyltransferase Os04g0175900
Up-regulated	5	Undisturbed	TraesCS5A02G546300.1	3.01186	0.0259383	putative ADP-ribosylation factor GTPase-activating protein AGD11
Up-regulated	5	Undisturbed	TraesCS7D02G018000.1	3.01159	0.0127899	disease resistance protein RGA2-like
Up-regulated	5	Undisturbed	TraesCS6A02G139100.1	3.00993	0.00876371	glutathione-S-transferase 28e45
Up-regulated	5	Undisturbed	TraesCS3B02G352200.1	3.00515	0.0480144	hypothetical protein TRIUR3_34483
Up-regulated	5	Undisturbed	TraesCS3D02G021700.1	3.00145	0.000983407	Polygalacturonase, putative, expressed [Source:UniProtKB/TrEMBL;Acc:I0JTV4]
Up-regulated	5	Undisturbed	TraesCS2B02G613100.1	2.9998	2.28107e-07	chalcone synthase 2-like
Up-regulated	5	Undisturbed	TraesCS7D02G164700.1	2.99878	0.0317639	pathogenesis-related protein 1-like
Up-regulated	5	Undisturbed	TraesCS1B02G183300.1	2.99856	0.0276722	putative ripening-related protein 5
Up-regulated	5	Undisturbed	TraesCS3B02G495700.1	2.98318	0.0103837	esterase PIR7B-like
Up-regulated	5	Undisturbed	TraesCS4B02G305700.1	2.98264	0.0123958	alcohol dehydrogenase-like 2
Up-regulated	5	Undisturbed	TraesCS3B02G174600.1	2.98121	0.0161809	uncharacterized protein LOC109753521
Up-regulated	5	Undisturbed	TraesCS2B02G169600.1	2.97923	0.00535139	Cold shock protein 2 [Source:UniProtKB/TrEMBL;Acc:W0K4H0]
Up-regulated	5	Undisturbed	TraesCS2A02G188900.2	2.97832	0.0493337	Putative polyol transporter 2
Up-regulated	5	Undisturbed	TraesCS7D02G461200.1	2.9739	0.000551377	Peroxidase
Up-regulated	5	Undisturbed	TraesCS1B02G249000.1	2.97285	0.0207387	(1,31,4) beta glucanase
Up-regulated	5	Undisturbed	TraesCS6A02G270300.1	2.96111	0.0310765	Pectin acetylesterase
Up-regulated	5	Undisturbed	TraesCS3B02G108800.1	2.95676	0.00484843	Xyloglucan endotransglucosylase/hydrolase [Source:UniProtKB/TrEMBL;Acc:W5CS03]
Up-regulated	5	Undisturbed	TraesCS7B02G298600.1	2.95524	0.0164116	Peroxidase
Up-regulated	5	Undisturbed	TraesCS5A02G259100.1	2.95295	0.014404	glutamate receptor 2.8-like
Up-regulated	5	Undisturbed	TraesCS7A02G342000.1	2.95197	0.00166236	ABC transporter G family member 4-like
Up-regulated	5	Undisturbed	TraesCS4D02G065400.1	2.95025	0.009126	glycerol-3-phosphate 2-O-acyltransferase 6-like
Up-regulated	5	Undisturbed	TraesCS1D02G048800.1	2.94538	0.0140857	UDP-glycosyltransferase 83A1-like
Up-regulated	5	Undisturbed	TraesCS2B02G067900.1	2.94392	0.00215475	senescence-specific cysteine protease SAG39
Up-regulated	5	Undisturbed	TraesCS2A02G096800.1	2.94284	0.0224581	DELLA protein RGL1-like
Up-regulated	5	Undisturbed	TraesCS3D02G056700.1	2.94037	0.0129329	protein NRT1/ PTR FAMILY 8.2-like
Up-regulated	5	Undisturbed	TraesCS7A02G464200.1	2.9367	0.0415044	alpha-glucosidase
Up-regulated	5	Undisturbed	TraesCS6A02G373700.1	2.93561	0.0158741	kelch-like protein 17
Up-regulated	5	Undisturbed	TraesCS4A02G179900.1	2.93428	0.0463122	tropinone reductase homolog At2g29290-like
Up-regulated	5	Undisturbed	TraesCS3A02G253700.2	2.93121	0.0215359	ABC transporter G family member 17-like
Up-regulated	5	Undisturbed	TraesCS7D02G309300.1	2.93108	0.00673626	ELMO domain-containing protein A
Up-regulated	5	Undisturbed	TraesCS2B02G236300.2	2.93095	0.00852061	probable mixed-linked glucan synthase 8
Up-regulated	5	Undisturbed	TraesCS1A02G271400.1	2.92208	0.0397394	hypothetical protein TRIUR3_35295
Up-regulated	5	Undisturbed	TraesCS4A02G248400.1	2.92142	0.024445	glycerol-3-phosphate 2-O-acyltransferase 6-like
Up-regulated	5	Undisturbed	TraesCS6D02G244700.1	2.91812	0.0413066	Pectin acetylesterase [Source:UniProtKB/TrEMBL;Acc:W5H0X4]
Up-regulated	5	Undisturbed	TraesCS1D02G236100.1	2.91572	0.0131414	uncharacterized protein LOC109757880
Up-regulated	5	Undisturbed	TraesCS3A02G257500.1	2.90975	0.0389611	ABC transporter B family member 4-like
Up-regulated	5	Undisturbed	TraesCS6A02G290200.1	2.90941	0.018522	protein trichome birefringence-like 20
Up-regulated	5	Undisturbed	TraesCS5D02G438100.1	2.90412	0.0267471	basic blue protein-like
Up-regulated	5	Undisturbed	TraesCS6B02G075600.1	2.90357	0.000394686	putative disease resistance protein RGA1
Up-regulated	5	Undisturbed	TraesCS6A02G091700.1	2.90081	0.000333505	protein SAR DEFICIENT 1-like
Up-regulated	5	Undisturbed	TraesCS2D02G108200.1	2.89903	0.0315879	Peroxidase
Up-regulated	5	Undisturbed	TraesCS5B02G551600.1	2.89738	0.0452543	Cytochrome P450 87A3
Up-regulated	5	Undisturbed	TraesCS3D02G006000.1	2.89457	0.0276889	keratin-associated protein 5-8-like
Up-regulated	5	Undisturbed	TraesCS3B02G489800.1	2.88659	0.0395597	Laccase [Source:UniProtKB/TrEMBL;Acc:A0A1D5VP31]
Up-regulated	5	Undisturbed	TraesCS2D02G342500.1	2.88406	0.0133373	potassium channel AKT3-like
Up-regulated	5	Undisturbed	TraesCS5A02G548500.1	2.88201	0.0149258	Xyloglucan endotransglucosylase/hydrolase [Source:UniProtKB/TrEMBL;Acc:A0A341V8Z1]
Up-regulated	5	Undisturbed	TraesCS7B02G112500.1	2.87848	0.0280785	fructose-1,6-bisphosphate aldolase 20
Up-regulated	5	Undisturbed	TraesCS7D02G194300.1	2.87757	0.0325351	putative F-box/LRR-repeat protein 23
Up-regulated	5	Undisturbed	TraesCS6B02G370100.1	2.87109	0.0437921	subtilisin-like protease SBT1.4
Up-regulated	5	Undisturbed	TraesCS1B02G225900.1	2.87052	0.0254952	expansin-B2-like
Up-regulated	5	Undisturbed	TraesCS6B02G028400.1	2.86475	0.00526793	non-specific lipid-transfer protein 4-like
Up-regulated	5	Undisturbed	TraesCS4D02G108300.1	2.86187	0.0389532	long chain acyl-CoA synthetase 9, chloroplastic-like
Up-regulated	5	Undisturbed	TraesCS7B02G023500.1	2.86111	0.0415044	Dirigent protein [Source:UniProtKB/TrEMBL;Acc:A0A341YMV1]
Up-regulated	5	Undisturbed	TraesCS7D02G417400.1	2.85753	0.040733	Peroxidase
Up-regulated	5	Undisturbed	TraesCS2D02G095300.1	2.84662	0.0454231	DELLA protein RGL1-like
Up-regulated	5	Undisturbed	TraesCS4A02G185900.1	2.84605	0.00103355	scarecrow-like protein 3
Up-regulated	5	Undisturbed	TraesCS3D02G236400.1	2.84299	0.00377598	uncharacterized protein LOC109782160
Up-regulated	5	Undisturbed	TraesCS7D02G438600.1	2.84174	0.00438699	cytochrome P450 72A15-like
Up-regulated	5	Undisturbed	TraesCS7A02G052600.1	2.83839	7.16151e-05	aspartyl protease family protein At5g10770-like
Up-regulated	5	Undisturbed	TraesCS5A02G135000.1	2.83749	0.0347949	scarecrow-like protein 3
Up-regulated	5	Undisturbed	TraesCS5B02G118800.2	2.83267	0.0184804	uncharacterized protein LOC109773799
Up-regulated	5	Undisturbed	TraesCS2A02G411700.1	2.83088	0.00760569	14 kDa proline-rich protein DC2.15-like
Up-regulated	5	Undisturbed	TraesCS5D02G290900.1	2.82901	0.0495365	alpha carbonic anhydrase 1, chloroplastic-like
Up-regulated	5	Undisturbed	TraesCS3B02G020300.1	2.82652	0.00236421	Polygalacturonase, putative,expressed [Source:UniProtKB/TrEMBL;Acc:D8L9U0]
Up-regulated	5	Undisturbed	TraesCS5D02G333800.2	2.82475	0.0178749	aspartate--tRNA ligase 2, cytoplasmic-like
Up-regulated	5	Undisturbed	TraesCS5D02G211000.1	2.82461	0.0092875	ABC transporter G family member 17-like
Up-regulated	5	Undisturbed	TraesCS5B02G520200.1	2.81943	0.0138762	Ammonium transporter [Source:UniProtKB/TrEMBL;Acc:A0A1D5Z4Z0]
Up-regulated	5	Undisturbed	TraesCS7A02G356100.3	2.81143	0.0177612	ABC transporter G family member 42
Up-regulated	5	Undisturbed	TraesCS2D02G152700.1	2.81033	0.0355038	Peroxidase [Source:UniProtKB/TrEMBL;Acc:W5C9H3]
Up-regulated	5	Undisturbed	TraesCS7D02G189000.1	2.80759	0.00655007	amino acid permease 8-like
Up-regulated	5	Undisturbed	TraesCS6B02G299900.1	2.80745	0.0463122	uncharacterized protein LOC109760683
Up-regulated	5	Undisturbed	TraesCS2A02G500400.1	2.80315	0.0273155	Glutamine synthetase [Source:UniProtKB/TrEMBL;Acc:Q45NB2]
Up-regulated	5	Undisturbed	TraesCS7D02G180800.1	2.80281	0.0487609	probable RNA-binding protein ARP1
Up-regulated	5	Undisturbed	TraesCS3D02G034200.2	2.80009	0.00709806	Bowman-Birk type trypsin inhibitor-like
Up-regulated	5	Undisturbed	TraesCS2B02G516800.1	2.7959	0.0010248	beta-fructofuranosidase, insoluble isoenzyme 7-like
Up-regulated	5	Undisturbed	TraesCS1D02G103200.1	2.79448	0.042888	uncharacterized protein LOC109761708
Up-regulated	5	Undisturbed	TraesCS1A02G181000.1	2.78943	0.00359237	methionine gamma-lyase
Up-regulated	5	Undisturbed	TraesCS2D02G065000.1	2.78844	0.0268945	Expansin [Source:UniProtKB/TrEMBL;Acc:A0A1D5UUR4]
Up-regulated	5	Undisturbed	TraesCS3A02G248800.12	2.78817	0.0168909	myosin-17-like
Up-regulated	5	Undisturbed	TraesCS1D02G088800.1	2.77894	0.0211147	Alpha-mannosidase [Source:UniProtKB/TrEMBL;Acc:A0A341PG27]
Up-regulated	5	Undisturbed	TraesCS5D02G427500.1	2.77892	0.00459183	hypothetical protein TRIUR3_15413
Up-regulated	5	Undisturbed	TraesCS6D02G252500.1	2.77505	0.0436392	uncharacterized protein LOC109760683
Up-regulated	5	Undisturbed	TraesCS4D02G072300.1	2.7607	0.0131171	protein FLOWERING LOCUS T-like
Up-regulated	5	Undisturbed	TraesCS3B02G263900.1	2.75625	0.00566165	uncharacterized protein LOC109782160
Up-regulated	5	Undisturbed	TraesCS1B02G313800.1	2.7458	0.0471134	Patatin [Source:UniProtKB/TrEMBL;Acc:A0A1D5SHB6]
Up-regulated	5	Undisturbed	TraesCS5B02G314800.1	2.73903	0.0300137	acyl transferase 1-like
Up-regulated	5	Undisturbed	TraesCS6A02G115400.1	2.73116	0.0474662	protein SRC2 homolog
Up-regulated	5	Undisturbed	TraesCS7B02G349000.1	2.73115	0.0424515	cytochrome P450 72A15-like
Up-regulated	5	Undisturbed	TraesCS5A02G475100.1	2.72864	0.0317929	subtilisin inhibitor-like
Up-regulated	5	Undisturbed	TraesCS4D02G352200.1	2.72323	0.00107557	respiratory burst oxidase homolog protein B-like
Up-regulated	5	Undisturbed	TraesCS5A02G240400.1	2.71817	0.0426834	prostaglandin reductase-3-like
Up-regulated	5	Undisturbed	TraesCS5D02G287000.1	2.71649	0.00262778	short-chain dehydrogenase TIC 32, chloroplastic-like
Up-regulated	5	Undisturbed	TraesCS2A02G170200.2	2.71311	0.0467985	protein STRICTOSIDINE SYNTHASE-LIKE 4-like
Up-regulated	5	Undisturbed	TraesCS5D02G090100.4	2.71234	0.00031345	Purple acid phosphatase [Source:UniProtKB/TrEMBL;Acc:A0A341VTX4]
Up-regulated	5	Undisturbed	TraesCS3D02G529400.2	2.70894	0.0328172	Glycerol-3-phosphate dehydrogenase [NAD(+)] [Source:UniProtKB/TrEMBL;Acc:A0A1D5WJN3]
Up-regulated	5	Undisturbed	TraesCS7A02G216300.1	2.70341	0.00579219	hypothetical protein TRIUR3_26981
Up-regulated	5	Undisturbed	TraesCS4A02G207000.1	2.70269	6.60781e-06	long chain acyl-CoA synthetase 9, chloroplastic-like
Up-regulated	5	Undisturbed	TraesCS6B02G297600.1	2.70176	0.0259678	Glycosyltransferase [Source:UniProtKB/TrEMBL;Acc:A0A1D6AP30]
Up-regulated	5	Undisturbed	TraesCS7B02G325800.1	2.69899	0.0487308	Peroxidase
Up-regulated	5	Undisturbed	TraesCS6D02G351500.1	2.68545	0.0260507	Peroxidase [Source:UniProtKB/TrEMBL;Acc:A0A1D6B4D2]
Up-regulated	5	Undisturbed	TraesCS2D02G333600.1	2.6842	0.0319428	unnamed protein product
Up-regulated	5	Undisturbed	TraesCS3B02G605200.1	2.68252	0.0491089	unnamed protein product
Up-regulated	5	Undisturbed	TraesCS5A02G416900.1	2.68163	0.0165926	uncharacterized protein LOC109753009
Up-regulated	5	Undisturbed	TraesCS5D02G163200.1	2.68	0.0189655	uncharacterized protein LOC109787642, partial
Up-regulated	5	Undisturbed	TraesCS6B02G368600.1	2.67628	0.00997486	subtilisin-like protease SBT1.4
Up-regulated	5	Undisturbed	TraesCS3B02G303400.1	2.67423	0.0117939	unnamed protein product
Up-regulated	5	Undisturbed	TraesCS5B02G242600.1	2.67366	0.0108455	serine carboxypeptidase 2-like
Up-regulated	5	Undisturbed	TraesCS4D02G358700.1	2.67041	0.00627484	Xyloglucan endotransglucosylase/hydrolase [Source:UniProtKB/TrEMBL;Acc:A0A1D5XXL5]
Up-regulated	5	Undisturbed	TraesCS5A02G246900.1	2.6694	0.0339443	GLABRA2 expression modulator-like
Up-regulated	5	Undisturbed	TraesCS7A02G353000.1	2.66699	0.00627529	Peroxidase [Source:UniProtKB/TrEMBL;Acc:A0A1D6BR09]
Up-regulated	5	Undisturbed	TraesCS4D02G307500.1	2.66629	0.0340151	MDIS1-interacting receptor like kinase 1-like
Up-regulated	5	Undisturbed	TraesCS3D02G093900.1	2.66392	0.0087447	Xyloglucan endotransglucosylase/hydrolase [Source:UniProtKB/TrEMBL;Acc:A0A1D5WRX7]
Up-regulated	5	Undisturbed	TraesCS5B02G551400.1	2.66145	0.0137444	Cytochrome P450 87A3
Up-regulated	5	Undisturbed	TraesCS7B02G041600.1	2.65772	0.00339274	flavonol synthase/flavanone 3-hydroxylase-like
Up-regulated	5	Undisturbed	TraesCS4D02G051300.1	2.64884	0.0195254	65-kDa microtubule-associated protein 6-like
Up-regulated	5	Undisturbed	TraesCS1D02G317700.1	2.63601	0.0289539	Peroxidase [Source:UniProtKB/TrEMBL;Acc:W5AFB4]
Up-regulated	5	Undisturbed	TraesCS2B02G310100.1	2.63553	4.27322e-06	uncharacterized protein LOC109744469
Up-regulated	5	Undisturbed	TraesCS3A02G445000.1	2.63317	0.0267222	2'-deoxymugineic-acid 2'-dioxygenase-like
Up-regulated	5	Undisturbed	TraesCS3D02G297600.1	2.62626	0.0222534	protein NRT1/ PTR FAMILY 1.2-like
Up-regulated	5	Undisturbed	TraesCS5D02G242400.1	2.6257	2.08032e-06	Hexosyltransferase [Source:UniProtKB/TrEMBL;Acc:A0A1D5ZKV8]
Up-regulated	5	Undisturbed	TraesCS4A02G081500.1	2.62353	0.0442294	transcription initiation factor IIF subunit alpha-like
Up-regulated	5	Undisturbed	TraesCS3A02G386500.1	2.62287	0.000517907	uncharacterized protein LOC109756262
Up-regulated	5	Undisturbed	TraesCS3B02G293300.1	2.62275	0.0269095	lipid phosphate phosphatase 2-like
Up-regulated	5	Undisturbed	TraesCS2A02G433700.1	2.61987	0.0131605	Xyloglucan endotransglucosylase/hydrolase [Source:UniProtKB/TrEMBL;Acc:W5AS78]
Up-regulated	5	Undisturbed	TraesCS2D02G260000.1	2.61785	0.0138706	ribonuclease 3-like
Up-regulated	5	Undisturbed	TraesCS4A02G296600.1	2.61774	0.0389532	Tubulin beta chain [Source:UniProtKB/TrEMBL;Acc:A0A1D5X8S8]
Up-regulated	5	Undisturbed	TraesCS7D02G537900.1	2.61628	0.0130527	ricin B-like lectin R40C1
Up-regulated	5	Undisturbed	TraesCS1D02G082500.3	2.61601	0.0159504	Non-specific serine/threonine protein kinase [Source:UniProtKB/TrEMBL;Acc:A0A341PDK8]
Up-regulated	5	Undisturbed	TraesCS3A02G236000.1	2.61304	0.0141734	uncharacterized protein LOC109782160
Up-regulated	5	Undisturbed	TraesCS5D02G436100.1	2.61193	0.0412535	cell number regulator 2-like
Up-regulated	5	Undisturbed	TraesCS6B02G280800.1	2.61162	0.0133825	ethylene-responsive transcription factor 5-like
Up-regulated	5	Undisturbed	TraesCS5B02G548500.1	2.60978	0.0139621	Expansin [Source:UniProtKB/TrEMBL;Acc:W5FDX3]
Up-regulated	5	Undisturbed	TraesCS5B02G551300.1	2.60783	0.00270873	Cytochrome P450 87A3
Up-regulated	5	Undisturbed	TraesCS6D02G011900.1	2.60486	0.0300274	N/A
Up-regulated	5	Undisturbed	TraesCS5D02G360200.1	2.60275	0.0443114	disease resistance protein RGA2-like
Up-regulated	5	Undisturbed	TraesCS2D02G007500.1	2.60038	0.00915517	beta-eudesmol synthase
Up-regulated	5	Undisturbed	TraesCS2A02G101800.1	2.59503	0.00825146	ricin B-like lectin R40G2
Up-regulated	5	Undisturbed	TraesCS5B02G233700.1	2.5914	3.52854e-05	Hexosyltransferase [Source:UniProtKB/TrEMBL;Acc:W5FEK1]
Up-regulated	5	Undisturbed	TraesCS2B02G337500.1	2.58935	0.0207221	Glycosyltransferase [Source:UniProtKB/TrEMBL;Acc:A0A1D5TZH2]
Up-regulated	5	Undisturbed	TraesCS5A02G130100.1	2.5887	0.000336181	stress-response A/B barrel domain-containing protein At5g22580-like
Up-regulated	5	Undisturbed	TraesCS7B02G274500.1	2.58831	0.00244048	Peroxidase [Source:UniProtKB/TrEMBL;Acc:A0A1D6C4U0]
Up-regulated	5	Undisturbed	TraesCS2B02G528600.1	2.58628	0.0419882	RPK [Source:UniProtKB/TrEMBL;Acc:M4T470]
Up-regulated	5	Undisturbed	TraesCS6B02G216800.5	2.58129	0.0463941	Serine/threonine-protein phosphatase 2A 55 kDa regulatory subunit B [Source:UniProtKB/TrEMBL;Acc:A0A341WYT1]
Up-regulated	5	Undisturbed	TraesCS2B02G244700.1	2.57934	0.0169265	syntaxin-132-like
Up-regulated	5	Undisturbed	TraesCS7D02G525500.1	2.57896	8.80801e-05	Dirigent protein [Source:UniProtKB/TrEMBL;Acc:A0A1D6CML1]
Up-regulated	5	Undisturbed	TraesCS5B02G559200.1	2.57626	0.00158618	Acyl carrier protein [Source:UniProtKB/TrEMBL;Acc:W5FET9]
Up-regulated	5	Undisturbed	TraesCS2D02G008000.1	2.57408	9.81022e-06	5-epiaristolochene 1,3-dihydroxylase-like
Up-regulated	5	Undisturbed	TraesCS5A02G197200.1	2.57263	0.037065	probable LRR receptor-like serine/threonine-protein kinase At1g51860
Up-regulated	5	Undisturbed	TraesCS7D02G115600.1	2.56414	0.00966534	Dirigent protein [Source:UniProtKB/TrEMBL;Acc:A0A1D6SFK6]
Up-regulated	5	Undisturbed	TraesCS2A02G002500.3	2.5488	0.0374462	polycomb group protein EMBRYONIC FLOWER 2-like
Up-regulated	5	Undisturbed	TraesCS6A02G220200.1	2.54854	0.0319792	Carboxypeptidase
Up-regulated	5	Undisturbed	TraesCS5A02G191200.1	2.54759	0.000258686	L-ascorbate oxidase-like
Up-regulated	5	Undisturbed	TraesCS3A02G523900.1	2.54671	0.000280501	Glycerol-3-phosphate dehydrogenase [NAD(+)] [Source:UniProtKB/TrEMBL;Acc:A0A1D5V995]
Up-regulated	5	Undisturbed	TraesCS3A02G233800.1	2.54668	0.0364713	AKT1-like potassium channel [Source:UniProtKB/TrEMBL;Acc:Q9M671]
Up-regulated	5	Undisturbed	TraesCS2D02G132500.1	2.5449	0.0311957	aspartyl protease AED3-like
Up-regulated	5	Undisturbed	TraesCSU02G091300.1	2.54219	0.0109302	hypothetical protein GQ55_8G206100
Up-regulated	5	Undisturbed	TraesCS4A02G056500.1	2.5324	0.0401201	protein transport protein Sec61 subunit alpha-like
Up-regulated	5	Undisturbed	TraesCS2D02G026400.1	2.52971	0.0307634	anthranilate O-methyltransferase 2-like
Up-regulated	5	Undisturbed	TraesCS2D02G074400.1	2.52714	0.0168298	IAA-amino acid hydrolase ILR1-like 8
Up-regulated	5	Undisturbed	TraesCS2D02G008100.1	2.52601	5.01509e-05	ent-isokaurene C2-hydroxylase-like
Up-regulated	5	Undisturbed	TraesCS5A02G244100.1	2.52332	0.0482798	putative serine carboxypeptidase-like 23
Up-regulated	5	Undisturbed	TraesCS5A02G050500.1	2.52285	0.0195001	vacuolar-sorting receptor 1-like
Up-regulated	5	Undisturbed	TraesCS4B02G318600.1	2.51971	0.0418108	Disease resistance protein RPM1
Up-regulated	5	Undisturbed	TraesCS6A02G294200.2	2.51525	0.0330248	Potassium transporter [Source:UniProtKB/TrEMBL;Acc:W5GBA2]
Up-regulated	5	Undisturbed	TraesCS2B02G430900.1	2.51343	0.0381096	serine carboxypeptidase-like 7
Up-regulated	5	Undisturbed	TraesCS5B02G195500.1	2.50046	0.0268061	enolase 1, chloroplastic
Up-regulated	5	Undisturbed	TraesCS7A02G024600.1	2.49845	0.0092875	probable E3 ubiquitin-protein ligase RHA1A
Up-regulated	5	Undisturbed	TraesCS3D02G033700.1	2.49458	0.0110822	Bowman-Birk type major trypsin inhibitor-like
Up-regulated	5	Undisturbed	TraesCS2B02G480700.1	2.49157	0.0294136	expansin-B9-like
Up-regulated	5	Undisturbed	TraesCS1D02G087600.1	2.48775	0.0144215	Carboxypeptidase [Source:UniProtKB/TrEMBL;Acc:A0A1D6RHJ2]
Up-regulated	5	Undisturbed	TraesCS6D02G257800.2	2.48138	0.0491204	GDSL esterase/lipase At1g28600-like
Up-regulated	5	Undisturbed	TraesCS2D02G526100.1	2.48019	0.0358774	hypothetical protein TRIUR3_08221
Up-regulated	5	Undisturbed	TraesCS3D02G094500.1	2.47548	0.0130081	myb-related protein 305-like
Up-regulated	5	Undisturbed	TraesCS3A02G426800.1	2.46121	0.0155904	stearoyl-[acyl-carrier-protein] 9-desaturase 2, chloroplastic
Up-regulated	5	Undisturbed	TraesCS5A02G512500.2	2.45848	0.000279696	ABC transporter C family member 13
Up-regulated	5	Undisturbed	TraesCS1A02G394100.1	2.45768	0.01109	putative calcium-binding protein CML45
Up-regulated	5	Undisturbed	TraesCS2A02G481900.1	2.45633	0.00231895	anthocyanidin reductase ((2S)-flavan-3-ol-forming)-like
Up-regulated	5	Undisturbed	TraesCS2D02G036500.1	2.44878	0.0284947	subtilisin-like protease SBT5.4
Up-regulated	5	Undisturbed	TraesCS3A02G304400.1	2.4475	0.0285231	protein NRT1/ PTR FAMILY 1.2-like
Up-regulated	5	Undisturbed	TraesCS2D02G418000.1	2.44697	0.0374462	disease resistance protein RPM1-like
Up-regulated	5	Undisturbed	TraesCS3B02G070200.1	2.4416	0.0133889	Peptide transporter PTR5
Up-regulated	5	Undisturbed	TraesCS7A02G518800.1	2.43898	0.0496623	NF-X1-type zinc finger protein NFXL1-like
Up-regulated	5	Undisturbed	TraesCS2A02G343900.1	2.43803	0.00435781	Aldose 1-epimerase [Source:UniProtKB/TrEMBL;Acc:A0A1D5TBS2]
Up-regulated	5	Undisturbed	TraesCS4B02G269200.1	2.43231	0.0309082	4-coumarate--CoA ligase-like 1
Up-regulated	5	Undisturbed	TraesCS3D02G230200.1	2.43124	0.0229543	uncharacterized protein LOC109750616
Up-regulated	5	Undisturbed	TraesCSU02G090900.1	2.42637	0.0389532	hypothetical protein GQ55_8G206100
Up-regulated	5	Undisturbed	TraesCSU02G091000.1	2.42637	0.0389532	hypothetical protein GQ55_8G206100
Up-regulated	5	Undisturbed	TraesCSU02G091100.1	2.42637	0.0389532	hypothetical protein GQ55_8G206100
Up-regulated	5	Undisturbed	TraesCSU02G091200.1	2.42637	0.0389532	hypothetical protein GQ55_8G206100
Up-regulated	5	Undisturbed	TraesCSU02G245400.1	2.42637	0.0389532	hypothetical protein GQ55_8G206100
Up-regulated	5	Undisturbed	TraesCSU02G252300.1	2.42637	0.0389532	hypothetical protein GQ55_8G206100
Up-regulated	5	Undisturbed	TraesCS5A02G319400.1	2.42463	0.039059	PTI1-like tyrosine-protein kinase At3g15890
Up-regulated	5	Undisturbed	TraesCS1D02G227600.1	2.42383	0.0219363	uncharacterized protein LOC109735886
Up-regulated	5	Undisturbed	TraesCS1A02G087500.1	2.42237	6.23647e-05	Alpha-mannosidase [Source:UniProtKB/TrEMBL;Acc:A0A341NJP7]
Up-regulated	5	Undisturbed	TraesCS6D02G300000.1	2.41774	0.0140857	galactoside 2-alpha-L-fucosyltransferase-like
Up-regulated	5	Undisturbed	TraesCS7B02G497000.1	2.41686	0.00163925	hypothetical protein SEVIR_8G165900v2
Up-regulated	5	Undisturbed	TraesCS6B02G273100.1	2.40872	0.0402024	GDSL esterase/lipase At5g55050-like
Up-regulated	5	Undisturbed	TraesCSU02G071900.1	2.4069	0.00673626	hypothetical protein GQ55_8G206100
Up-regulated	5	Undisturbed	TraesCS4D02G114400.1	2.4054	0.0404334	transcription repressor OFP13-like
Up-regulated	5	Undisturbed	TraesCS3D02G536000.1	2.40474	0.00701795	unnamed protein product
Up-regulated	5	Undisturbed	TraesCS6B02G402600.1	2.40444	0.00132513	heparanase-like protein 3
Up-regulated	5	Undisturbed	TraesCS7D02G488900.1	2.40378	4.1281e-05	N/A
Up-regulated	5	Undisturbed	TraesCS7A02G474200.1	2.39794	0.0347723	Peroxidase
Up-regulated	5	Undisturbed	TraesCS2B02G392200.1	2.39707	0.0299056	GEM-like protein 7
Up-regulated	5	Undisturbed	TraesCS7D02G279900.1	2.39215	0.0411873	Carboxypeptidase [Source:UniProtKB/TrEMBL;Acc:A0A1D6CYB3]
Up-regulated	5	Undisturbed	TraesCS6D02G246300.1	2.38327	5.03274e-05	DNA topoisomerase 2 [Source:UniProtKB/TrEMBL;Acc:A0A341XES5]
Up-regulated	5	Undisturbed	TraesCS6D02G192600.1	2.38279	0.000711758	putative serine/threonine-protein kinase
Up-regulated	5	Undisturbed	TraesCS1A02G318400.1	2.37794	0.0344072	Peroxidase [Source:UniProtKB/TrEMBL;Acc:A0A341NSV0]
Up-regulated	5	Undisturbed	TraesCS2A02G515700.1	2.37578	0.00407165	glycerol kinase
Up-regulated	5	Undisturbed	TraesCS7D02G171000.1	2.37284	0.0164336	Mono- and diacylglycerol lipase
Up-regulated	5	Undisturbed	TraesCS7D02G064800.1	2.37161	0.040848	GDSL esterase/lipase At1g29660-like [
Up-regulated	5	Undisturbed	TraesCS5A02G430500.1	2.36349	0.021477	Mavicyanin
Up-regulated	5	Undisturbed	TraesCS2D02G036400.1	2.36176	1.14624e-06	subtilisin-like protease SBT5.3
Up-regulated	5	Undisturbed	TraesCS1D02G033700.1	2.36118	0.0305224	caffeate O-methyltransferase-like protein 2
Up-regulated	5	Undisturbed	TraesCS6A02G279500.1	2.35974	0.00839329	Xylem cysteine proteinase 1
Up-regulated	5	Undisturbed	TraesCS1B02G407300.1	2.3553	0.0470691	GDSL esterase/lipase At5g45910-like
Up-regulated	5	Undisturbed	TraesCS6D02G212900.1	2.34855	0.0389532	Aquaporin 7
Up-regulated	5	Undisturbed	TraesCS2B02G526800.1	2.34581	0.0267222	hypothetical protein BRADI_5g24843v3
Up-regulated	5	Undisturbed	TraesCS2B02G428300.1	2.33898	0.0412941	Glycosyltransferase [Source:UniProtKB/TrEMBL;Acc:W5BF50]
Up-regulated	5	Undisturbed	TraesCS1B02G350800.1	2.33889	0.02162	non-symbiotic hemoglobin-like
Up-regulated	5	Undisturbed	TraesCS7D02G369700.1	2.33884	0.0012461	Peroxidase [Source:UniProtKB/TrEMBL;Acc:A0A1D6SEY5]
Up-regulated	5	Undisturbed	TraesCS3D02G506200.1	2.33437	0.000116884	Protein DETOXIFICATION [Source:UniProtKB/TrEMBL;Acc:A0A1D5WFZ9]
Up-regulated	5	Undisturbed	TraesCS3D02G229500.1	2.32969	0.0405835	probable GABA transporter 2
Up-regulated	5	Undisturbed	TraesCS7D02G531400.1	2.3293	0.000380872	thiosulfate sulfurtransferase 16, chloroplastic-like
Up-regulated	5	Undisturbed	TraesCS2D02G101200.1	2.32896	0.00935696	ricin B-like lectin R40G2
Up-regulated	5	Undisturbed	TraesCS7B02G386800.1	2.32492	0.0240424	hypothetical protein SORBI_3004G075400
Up-regulated	5	Undisturbed	TraesCS7D02G024600.1	2.32435	0.0410947	polyubiquitin-like
Up-regulated	5	Undisturbed	TraesCSU02G003300.1	2.32032	0.0196143	probable mixed-linked glucan synthase 8 [
Up-regulated	5	Undisturbed	TraesCS2B02G232700.1	2.31855	0.0259678	NDR1/HIN1-like protein 12
Up-regulated	5	Undisturbed	TraesCS7D02G368800.1	2.31466	0.0282728	berberine bridge enzyme-like 27
Up-regulated	5	Undisturbed	TraesCS7D02G360100.1	2.31395	0.0114175	Xyloglucan endotransglucosylase/hydrolase [Source:UniProtKB/TrEMBL;Acc:A0A1D6CRL3]
Up-regulated	5	Undisturbed	TraesCS7B02G068300.1	2.30992	0.000186846	pathogenesis-related protein 1-like
Up-regulated	5	Undisturbed	TraesCS7B02G068400.1	2.30168	0.0383916	pathogenesis-related protein 1-like
Up-regulated	5	Undisturbed	TraesCS3B02G009100.1	2.30098	0.0370687	unnamed protein product
Up-regulated	5	Undisturbed	TraesCS5A02G295200.1	2.30027	0.0119148	Beta-glucosidase 31
Up-regulated	5	Undisturbed	TraesCS4B02G237300.1	2.3001	0.000161957	Hemoglobin 1 [Source:UniProtKB/TrEMBL;Acc:M5AJV9]
Up-regulated	5	Undisturbed	TraesCS5A02G419700.1	2.29386	0.0369238	protein app1-like
Up-regulated	5	Undisturbed	TraesCS3B02G454900.1	2.29244	0.0401201	unnamed protein product
Up-regulated	5	Undisturbed	TraesCS6A02G308300.1	2.29108	0.0379434	MLO-like protein [Source:UniProtKB/TrEMBL;Acc:A0A341WWM3]
Up-regulated	5	Undisturbed	TraesCS7D02G349200.1	2.28711	0.00871467	putative cellulose synthase A catalytic subunit 11
Up-regulated	5	Undisturbed	TraesCS1D02G120700.1	2.28245	0.0084821	uncharacterized protein LOC109742496
Up-regulated	5	Undisturbed	TraesCS5D02G517200.1	2.27993	0.000136502	Cellulose synthase [Source:UniProtKB/TrEMBL;Acc:A0A341VNV6]
Up-regulated	5	Undisturbed	TraesCS2D02G316500.1	2.27974	0.00998176	unnamed protein product
Up-regulated	5	Undisturbed	TraesCS1D02G317900.1	2.27577	0.0110029	Peroxidase [Source:UniProtKB/TrEMBL;Acc:A0A341PP48]
Up-regulated	5	Undisturbed	TraesCS4A02G269800.1	2.26425	0.0012242	microsomal glutathione S-transferase 3-like
Up-regulated	5	Undisturbed	TraesCS2A02G488200.1	2.25987	0.00210145	uncharacterized protein LOC109750710
Up-regulated	5	Undisturbed	TraesCS3D02G249500.2	2.25816	0.0384705	glucan endo-1,3-beta-glucosidase 14-like
Up-regulated	5	Undisturbed	TraesCS5D02G482200.2	2.25706	0.0350538	putative GTP-binding protein EngB
Up-regulated	5	Undisturbed	TraesCS2B02G500100.1	2.25613	0.0475579	pathogenesis-related protein 1-like
Up-regulated	5	Undisturbed	TraesCS7D02G433500.1	2.25275	0.0075827	exocyst complex component EXO84C
Up-regulated	5	Undisturbed	TraesCS5B02G488100.1	2.25063	0.00137742	subtilisin inhibitor-like
Up-regulated	5	Undisturbed	TraesCS1D02G111200.2	2.24616	0.0268945	cytochrome P450 72A14-like
Up-regulated	5	Undisturbed	TraesCS7A02G010200.1	2.24507	0.0268945	sucrose:sucrose 1-fructosyltransferase-like
Up-regulated	5	Undisturbed	TraesCS4B02G090500.3	2.24391	0.0493106	CCR4-NOT transcription complex subunit 11-like
Up-regulated	5	Undisturbed	TraesCS2B02G063400.1	2.24365	0.00498889	Sulfotransferase [Source:UniProtKB/TrEMBL;Acc:A0A341QJ53]
Up-regulated	5	Undisturbed	TraesCS2D02G261900.1	2.24092	0.0259286	CSC1-like protein At4g02900
Up-regulated	5	Undisturbed	TraesCS1B02G236000.1	2.23418	0.0253474	probable inactive receptor-like protein kinase At3g56050
Up-regulated	5	Undisturbed	TraesCS1D02G031300.1	2.22623	0.0145103	unnamed protein product
Up-regulated	5	Undisturbed	TraesCS3B02G209800.1	2.217	0.000786441	Peroxidase [Source:UniProtKB/TrEMBL;Acc:W5CYH6]
Up-regulated	5	Undisturbed	TraesCS5A02G025000.1	2.21669	0.0160652	Laccase [Source:UniProtKB/TrEMBL;Acc:A0A1D5YS28]
Up-regulated	5	Undisturbed	TraesCS6A02G270700.1	2.2125	0.026931	Pectin acetylesterase [Source:UniProtKB/TrEMBL;Acc:A0A1D6A736]
Up-regulated	5	Undisturbed	TraesCS3A02G348000.1	2.2079	0.0179799	Laccase
Up-regulated	5	Undisturbed	TraesCS2B02G338600.1	2.20232	0.0253251	sugar transport protein 5-like
Up-regulated	5	Undisturbed	TraesCS7A02G357800.1	2.19715	0.000167571	probable inositol oxygenase
Up-regulated	5	Undisturbed	TraesCS2A02G070900.1	2.19707	0.00068231	probable cinnamyl alcohol dehydrogenase 6
Up-regulated	5	Undisturbed	TraesCS5A02G268200.1	2.19153	0.00504193	Bifunctional dihydroflavonol 4-reductase/flavanone 4-reductase
Up-regulated	5	Undisturbed	TraesCS4B02G110600.1	2.18795	0.0102329	long chain acyl-CoA synthetase 9, chloroplastic-like
Up-regulated	5	Undisturbed	TraesCS3B02G009300.1	2.18518	0.00430974	keratin-associated protein 5-9-like
Up-regulated	5	Undisturbed	TraesCS2B02G341000.1	2.18367	0.0285757	aldose 1-epimerase-like
Up-regulated	5	Undisturbed	TraesCS4B02G108600.2	2.18184	0.0328673	Auxin-responsive protein [Source:UniProtKB/TrEMBL;Acc:A0A1D5XUV2]
Up-regulated	5	Undisturbed	TraesCS2A02G259200.1	2.18	0.0409029	probable NAD(P)H dehydrogenase (quinone) FQR1-like 1
Up-regulated	5	Undisturbed	TraesCS5A02G505000.2	2.17796	9.3406e-09	Aconitate hydratase [Source:UniProtKB/TrEMBL;Acc:A0A1D5YLT8]
Up-regulated	5	Undisturbed	TraesCS4D02G264100.1	2.17792	0.00402954	putative high affinity sulfate transporter
Up-regulated	5	Undisturbed	TraesCS4B02G136100.1	2.1719	0.00514965	Clathrin heavy chain [Source:UniProtKB/TrEMBL;Acc:A0A341U4W3]
Up-regulated	5	Undisturbed	TraesCS3B02G199900.1	2.17075	0.038278	Expansin [Source:UniProtKB/TrEMBL;Acc:A0A341SDS3]
Up-regulated	5	Undisturbed	TraesCS3A02G446700.1	2.16737	0.0415044	Potassium transporter [Source:UniProtKB/TrEMBL;Acc:A0A341S4R6]
Up-regulated	5	Undisturbed	TraesCS3B02G455100.1	2.15949	0.0231794	putative lipid-transfer protein DIR1
Up-regulated	5	Undisturbed	TraesCS5D02G276200.1	2.1581	0.0131995	cinnamoyl-CoA reductase 2-like
Up-regulated	5	Undisturbed	TraesCS5D02G384100.1	2.15305	1.26743e-06	pyruvate dehydrogenase E1 component subunit beta-4, chloroplastic
Up-regulated	5	Undisturbed	TraesCS5D02G247000.2	2.1508	0.000531462	prostaglandin reductase-3-like
Up-regulated	5	Undisturbed	TraesCS7B02G258300.1	2.14567	8.10653e-05	enoyl-[acyl-carrier-protein] reductase [NADH] 1, chloroplastic
Up-regulated	5	Undisturbed	TraesCS2A02G123400.1	2.14558	0.000103187	berberine bridge enzyme-like 18
Up-regulated	5	Undisturbed	TraesCS6D02G063400.1	2.1435	0.0303065	wall-associated receptor kinase 4-like
Up-regulated	5	Undisturbed	TraesCS5B02G137100.1	2.13753	0.0263092	neo-calmodulin-like
Up-regulated	5	Undisturbed	TraesCS2B02G551700.1	2.12918	1.39972e-05	uncharacterized protein LOC109754942
Up-regulated	5	Undisturbed	TraesCS4A02G114700.1	2.12613	0.0197749	Laccase [Source:UniProtKB/TrEMBL;Acc:A0A1D5XBD3]
Up-regulated	5	Undisturbed	TraesCS2B02G018700.1	2.12358	0.0227249	Putative disease resistance protein RGA3
Up-regulated	5	Undisturbed	TraesCS3D02G056400.1	2.11506	0.0253474	putative disease resistance RPP13-like protein 3
Up-regulated	5	Undisturbed	TraesCS2A02G051600.2	2.11003	0.0219888	tricetin 3',4',5'-O-trimethyltransferase-like
Up-regulated	5	Undisturbed	TraesCS1A02G212200.1	2.10721	0.000938159	Beta-expansin TaEXPB5 [Source:UniProtKB/TrEMBL;Acc:Q56TP7]
Up-regulated	5	Undisturbed	TraesCS5D02G199900.1	2.09771	0.0256245	L-ascorbate oxidase-like
Up-regulated	5	Undisturbed	TraesCS7D02G506300.2	2.08291	0.0260507	isoleucine--tRNA ligase, cytoplasmic
Up-regulated	5	Undisturbed	TraesCS5D02G388800.2	2.07475	8.81099e-05	linoleate 9S-lipoxygenase 2-like
Up-regulated	5	Undisturbed	TraesCS4B02G271000.1	2.06755	0.0227681	Expansin [Source:UniProtKB/TrEMBL;Acc:A0A341UAF1]
Up-regulated	5	Undisturbed	TraesCS1D02G210100.1	2.06715	0.0499187	predicted protein
Up-regulated	5	Undisturbed	TraesCS1A02G203900.1	2.05637	0.0336698	Glutathione S-transferase
Up-regulated	5	Undisturbed	TraesCS3A02G395600.1	2.05273	0.0297932	hypothetical protein TRIUR3_12122
Up-regulated	5	Undisturbed	TraesCS6A02G333900.1	2.05151	0.000110064	nitrite reductase
Up-regulated	5	Undisturbed	TraesCS5D02G565300.1	2.04745	0.0001922	Acyl carrier protein [Source:UniProtKB/TrEMBL;Acc:W5G0C5]
Up-regulated	5	Undisturbed	TraesCS6B02G275700.1	2.04024	0.045824	expansin EXPB9
Up-regulated	5	Undisturbed	TraesCS3A02G297200.1	2.03533	0.0320527	Peroxidase [Source:UniProtKB/TrEMBL;Acc:A0A1D5V9V3]
Up-regulated	5	Undisturbed	TraesCS5A02G446800.1	2.03308	0.00856649	SEC12-like protein 1
Up-regulated	5	Undisturbed	TraesCSU02G054700.2	2.02401	0.0300137	Glycerol-3-phosphate dehydrogenase [NAD(+)] [Source:UniProtKB/TrEMBL;Acc:A0A1D5V995]
Up-regulated	5	Undisturbed	TraesCS4B02G340200.1	2.0208	0.00120868	Peroxidase [Source:UniProtKB/TrEMBL;Acc:A0A1D5XLQ1]
Up-regulated	5	Undisturbed	TraesCS1D02G273300.1	2.01433	0.0418017	hypothetical protein
Up-regulated	5	Undisturbed	TraesCS5D02G141300.1	2.01209	0.0398547	long chain acyl-CoA synthetase 6, peroxisomal-like
Up-regulated	5	Undisturbed	TraesCS7B02G213000.1	2.01191	0.0269302	lysine histidine transporter 1-like
Up-regulated	5	Undisturbed	TraesCS6A02G183200.1	2.01072	0.0396115	ABC transporter A family member 8-like
Up-regulated	5	Undisturbed	TraesCS5A02G374500.1	2.01049	1.11377e-05	pyruvate dehydrogenase E1 component subunit beta-4, chloroplastic
Up-regulated	5	Undisturbed	TraesCS1D02G144000.1	2.00714	9.93869e-07	chaperonin CPN60-1, mitochondrial
Up-regulated	5	Undisturbed	TraesCS6D02G170100.1	2.00573	0.0493106	ABC transporter A family member 8-like
Up-regulated	5	Undisturbed	TraesCS1A02G317900.1	2.0056	0.00209537	Peroxidase [Source:UniProtKB/TrEMBL;Acc:A0A341NSU5]
Up-regulated	5	Undisturbed	TraesCS3D02G219100.2	2.00173	0.00230082	amino-acid permease BAT1 homolog
Up-regulated	5	Undisturbed	TraesCS5B02G031800.1	1.99867	0.0423378	cation/H(+) antiporter 19
Up-regulated	5	Undisturbed	TraesCS7B02G234400.1	1.99649	0.000130505	glyceraldehyde-3-phosphate dehydrogenase 2, cytosolic
Up-regulated	5	Undisturbed	TraesCS1D02G213700.1	1.99648	0.0233311	Trehalose 6-phosphate phosphatase [Source:UniProtKB/TrEMBL;Acc:W5ADC4]
Up-regulated	5	Undisturbed	TraesCS1A02G078100.1	1.98577	0.02162	Peroxidase [Source:UniProtKB/TrEMBL;Acc:W4ZYP4]
Up-regulated	5	Undisturbed	TraesCS3A02G096000.1	1.98499	0.00209537	amino-acid permease BAT1 homolog
Up-regulated	5	Undisturbed	TraesCS7A02G453100.1	1.98481	0.0105201	uncharacterized protein LOC109768958
Up-regulated	5	Undisturbed	TraesCS6A02G173600.1	1.98261	0.0208247	cinnamate beta-D-glucosyltransferase-like
Up-regulated	5	Undisturbed	TraesCS2B02G553700.1	1.98056	0.0412952	unnamed protein product
Up-regulated	5	Undisturbed	TraesCS4A02G409400.1	1.98016	0.034817	MDIS1-interacting receptor like kinase 1-like
Up-regulated	5	Undisturbed	TraesCS2D02G206200.1	1.9762	7.64747e-05	insulin-degrading enzyme-like 1, peroxisomal
Up-regulated	5	Undisturbed	TraesCS5A02G188100.1	1.96706	4.1386e-08	enolase 1, chloroplastic
Up-regulated	5	Undisturbed	TraesCS1A02G313900.1	1.96571	0.00427244	metacaspase 3
Up-regulated	5	Undisturbed	TraesCS6B02G275100.1	1.96024	0.0273644	tonoplast intrinsic protein
Up-regulated	5	Undisturbed	TraesCS6D02G385600.1	1.93942	0.0418017	putative transporter arsB
Up-regulated	5	Undisturbed	TraesCS4D02G015400.1	1.9376	0.012124	Tubulin beta chain [Source:UniProtKB/TrEMBL;Acc:W5ENX5]
Up-regulated	5	Undisturbed	TraesCS7A02G040700.5	1.9311	0.0257325	protein argonaute 1B
Up-regulated	5	Undisturbed	TraesCS2A02G446900.1	1.92957	0.0145133	S-norcoclaurine synthase
Up-regulated	5	Undisturbed	TraesCS4D02G238600.1	1.92172	0.0157917	Hemoglobin 1 [Source:UniProtKB/TrEMBL;Acc:M5AJV9]
Up-regulated	5	Undisturbed	TraesCS7A02G317500.1	1.91878	0.0273467	L-gulonolactone oxidase 2-like
Up-regulated	5	Undisturbed	TraesCS6B02G197100.1	1.912	0.025929	peroxiredoxin-2E-2, chloroplastic-like
Up-regulated	5	Undisturbed	TraesCS3B02G562500.1	1.91044	1.43733e-06	Protein DETOXIFICATION [Source:UniProtKB/TrEMBL;Acc:A0A1D5VYF0]
Up-regulated	5	Undisturbed	TraesCS4D02G286600.1	1.9104	0.0202313	transcription factor ILI6
Up-regulated	5	Undisturbed	TraesCS3D02G036100.1	1.90327	0.025202	Mannose-6-phosphate isomerase [Source:UniProtKB/TrEMBL;Acc:A0A1D5WR65]
Up-regulated	5	Undisturbed	TraesCS7D02G531200.1	1.90295	0.000191387	Phospholipase D [Source:UniProtKB/TrEMBL;Acc:A0A1D6CPC7]
Up-regulated	5	Undisturbed	TraesCS5B02G376400.1	1.90215	0.000183026	pyruvate dehydrogenase E1 component subunit beta-4, chloroplastic
Up-regulated	5	Undisturbed	TraesCS7A02G306600.1	1.90129	0.00874219	external alternative NAD(P)H-ubiquinone oxidoreductase B2, mitochondrial-like
Up-regulated	5	Undisturbed	TraesCS2B02G549400.1	1.89844	0.00823892	3-oxoacyl-[acyl-carrier-protein] synthase III, chloroplastic
Up-regulated	5	Undisturbed	TraesCS5B02G149900.1	1.89671	0.0121756	Laccase [Source:UniProtKB/TrEMBL;Acc:W5F923]
Up-regulated	5	Undisturbed	TraesCS5D02G139800.1	1.88683	0.000294058	2-isopropylmalate synthase A-like
Up-regulated	5	Undisturbed	TraesCS1A02G444300.1	1.87099	0.00922693	Nucleoside diphosphate kinase [Source:UniProtKB/TrEMBL;Acc:W4ZM65]
Up-regulated	5	Undisturbed	TraesCS5D02G258900.2	1.8682	0.0405835	heat shock protein 90-5, chloroplastic
Up-regulated	5	Undisturbed	TraesCS3D02G250900.1	1.86778	0.000817604	V-type proton ATPase subunit B 2-like
Up-regulated	5	Undisturbed	TraesCS5B02G111300.2	1.86703	0.0010248	exocyst complex component 5
Up-regulated	5	Undisturbed	TraesCS5B02G382600.1	1.86285	0.000266558	Lipoxygenase [Source:UniProtKB/TrEMBL;Acc:W5FF28]
Up-regulated	5	Undisturbed	TraesCS5B02G450700.1	1.86222	0.0135632	SEC12-like protein 1
Up-regulated	5	Undisturbed	TraesCS5B02G097900.1	1.85775	0.00398427	2-alkenal reductase (NADP(+)-dependent)-like
Up-regulated	5	Undisturbed	TraesCS5A02G321100.1	1.85543	0.0199159	putative inactive purple acid phosphatase 29
Up-regulated	5	Undisturbed	TraesCS2D02G168200.1	1.85494	0.00514792	Trehalose 6-phosphate phosphatase [Source:UniProtKB/TrEMBL;Acc:A0A1D5V0F4]
Up-regulated	5	Undisturbed	TraesCS5D02G202900.1	1.85316	2.39643e-05	enolase 1, chloroplastic
Up-regulated	5	Undisturbed	TraesCS1A02G119800.1	1.85138	0.0195001	uncharacterized protein LOC109742496
Up-regulated	5	Undisturbed	TraesCS5B02G116300.1	1.85035	0.00311409	Dihydrolipoamide acetyltransferase component of pyruvate dehydrogenase complex [Source:UniProtKB/TrEMBL;Acc:A0A1D6D9N6]
Up-regulated	5	Undisturbed	TraesCS7D02G364900.1	1.84379	0.0489665	probable inositol oxygenase
Up-regulated	5	Undisturbed	TraesCS1A02G405600.1	1.83968	0.00907006	sugar transporter ERD6-like 4
Up-regulated	5	Undisturbed	TraesCS1B02G325800.1	1.83505	0.00942274	metacaspase 3
Up-regulated	5	Undisturbed	TraesCS4B02G340100.1	1.83489	0.00579219	Peroxidase [Source:UniProtKB/TrEMBL;Acc:A0A341U5S8]
Up-regulated	5	Undisturbed	TraesCS7B02G478400.1	1.83345	0.0191621	Dirigent protein [Source:UniProtKB/TrEMBL;Acc:A0A1D6C5M2]
Up-regulated	5	Undisturbed	TraesCS7B02G259200.1	1.82338	0.0249563	aldehyde dehydrogenase family 2 member C4-like
Up-regulated	5	Undisturbed	TraesCS1A02G404200.1	1.82099	0.00332586	hypothetical protein TRIUR3_29962
Up-regulated	5	Undisturbed	TraesCS7B02G269900.1	1.82057	0.000699455	probable inositol oxygenase
Up-regulated	5	Undisturbed	TraesCS2B02G446700.1	1.81932	0.0391781	UPF0481 protein At3g47200-like
Up-regulated	5	Undisturbed	TraesCS7A02G160600.1	1.80969	1.06861e-05	3-oxoacyl-[acyl-carrier-protein] synthase [Source:UniProtKB/TrEMBL;Acc:A0A1D6SCC4]
Up-regulated	5	Undisturbed	TraesCS2D02G349900.1	1.80502	0.0079842	uncharacterized protein LOC109744797
Up-regulated	5	Undisturbed	TraesCS3B02G388500.1	1.80216	0.0238374	unnamed protein product
Up-regulated	5	Undisturbed	TraesCS5A02G249700.1	1.80067	0.0010419	tRNA (cytosine(34)-C(5))-methyltransferase
Up-regulated	5	Undisturbed	TraesCS2A02G277900.1	1.80061	0.0153478	putative quinone-oxidoreductase homolog, chloroplastic
Up-regulated	5	Undisturbed	TraesCSU02G138300.1	1.79928	0.00402599	trans-cinnamate 4-monooxygenase-like
Up-regulated	5	Undisturbed	TraesCS1D02G215200.1	1.7988	0.00879035	expansin-B2-like
Up-regulated	5	Undisturbed	TraesCS4B02G392400.1	1.79742	0.0407755	Sulfotransferase
Up-regulated	5	Undisturbed	TraesCS5D02G331800.1	1.79147	0.0223507	uncharacterized protein LOC109740687
Up-regulated	5	Undisturbed	TraesCS3D02G185000.1	1.79119	4.50109e-05	Peroxidase [Source:UniProtKB/TrEMBL;Acc:A0A1D5WU40]
Up-regulated	5	Undisturbed	TraesCS1D02G318000.1	1.77221	0.0152666	Peroxidase [Source:UniProtKB/TrEMBL;Acc:A0A341PQ18]
Up-regulated	5	Undisturbed	TraesCS2D02G291400.1	1.76951	0.0168105	uncharacterized protein LOC109744467
Up-regulated	5	Undisturbed	TraesCS2B02G553100.1	1.76931	0.00400925	beta-D-xylosidase 4-like
Up-regulated	5	Undisturbed	TraesCS7A02G501500.1	1.76611	0.0217212	N/A
Up-regulated	5	Undisturbed	TraesCS4B02G189500.1	1.76535	0.0461035	Laccase [Source:UniProtKB/TrEMBL;Acc:A0A1D5XHL9]
Up-regulated	5	Undisturbed	TraesCS2A02G205300.1	1.76364	0.0461427	NDR1/HIN1-like protein 12
Up-regulated	5	Undisturbed	TraesCS2B02G544200.1	1.76363	5.2479e-06	glycerol kinase
Up-regulated	5	Undisturbed	TraesCS7D02G210300.1	1.75866	0.0465991	basic blue protein-like
Up-regulated	5	Undisturbed	TraesCS2A02G351400.1	1.75453	0.00798729	hypothetical protein TRIUR3_06873
Up-regulated	5	Undisturbed	TraesCS1D02G361400.1	1.75377	1.28119e-05	6-phosphogluconate dehydrogenase, decarboxylating [Source:UniProtKB/TrEMBL;Acc:A0A341PN54]
Up-regulated	5	Undisturbed	TraesCS2B02G245900.2	1.75213	0.0341609	glucose-6-phosphate/phosphate translocator 2, chloroplastic-like
Up-regulated	5	Undisturbed	TraesCS2A02G005200.1	1.75005	0.00386507	Phosphotransferase [Source:UniProtKB/TrEMBL;Acc:A0A1D5TQF2]
Up-regulated	5	Undisturbed	TraesCS7B02G188400.2	1.74775	0.00509816	probable mixed-linked glucan synthase 6
Up-regulated	5	Undisturbed	TraesCS2D02G517200.1	1.74554	0.0248798	glycerol kinase
Up-regulated	5	Undisturbed	TraesCS2B02G050800.1	1.74197	0.00369613	Subtilisin-like protease
Up-regulated	5	Undisturbed	TraesCS7D02G447200.1	1.74148	0.0153998	L-ascorbate oxidase homolog
Up-regulated	5	Undisturbed	TraesCS2A02G294100.1	1.73651	0.0184906	uncharacterized protein LOC109744467
Up-regulated	5	Undisturbed	TraesCS7D02G434300.1	1.73595	0.00318892	Dirigent protein [Source:UniProtKB/TrEMBL;Acc:A0A1D6CPH2]
Up-regulated	5	Undisturbed	TraesCS2D02G386000.1	1.73373	0.0101584	cytochrome P450 84A1-like
Up-regulated	5	Undisturbed	TraesCS1D02G318600.1	1.73285	0.0415334	Peroxidase [Source:UniProtKB/TrEMBL;Acc:A0A341PLN6]
Up-regulated	5	Undisturbed	TraesCS5B02G551200.1	1.72972	0.0291891	glycine-rich cell wall structural protein 2-like
Up-regulated	5	Undisturbed	TraesCS2D02G181700.1	1.72866	0.00461776	Alpha-1,4-glucan-protein synthase [UDP-forming] 1
Up-regulated	5	Undisturbed	TraesCS7D02G434600.1	1.71668	0.000387066	uncharacterized protein LOC109786316
Up-regulated	5	Undisturbed	TraesCS1D02G107100.1	1.71444	3.45111e-05	probable mixed-linked glucan synthase 8
Up-regulated	5	Undisturbed	TraesCS6D02G231200.1	1.70872	0.0135493	expansin-B11-like
Up-regulated	5	Undisturbed	TraesCS3D02G244900.1	1.7048	0.0257325	fasciclin-like arabinogalactan protein 11
Up-regulated	5	Undisturbed	TraesCS4A02G098300.1	1.70213	0.0360999	beta-glucuronosyltransferase GlcAT14B-like
Up-regulated	5	Undisturbed	TraesCS3D02G110700.1	1.69868	0.000266558	Malic enzyme [Source:UniProtKB/TrEMBL;Acc:A0A1D5WWU8]
Up-regulated	5	Undisturbed	TraesCS2D02G500600.1	1.69357	0.000914603	Glutamine synthetase [Source:UniProtKB/TrEMBL;Acc:Q45NB2]
Up-regulated	5	Undisturbed	TraesCS2D02G351300.2	1.69044	0.0209537	Endoglucanase [Source:UniProtKB/TrEMBL;Acc:A0A341RCS9]
Up-regulated	5	Undisturbed	TraesCS1B02G330400.2	1.6904	0.0115496	Peroxidase [Source:UniProtKB/TrEMBL;Acc:A0A341P5G8]
Up-regulated	5	Undisturbed	TraesCS3D02G519100.1	1.67079	0.0409143	golgin IMH1-like [Aegilops
Up-regulated	5	Undisturbed	TraesCS6B02G071200.1	1.66987	0.0292414	Peroxidase
Up-regulated	5	Undisturbed	TraesCS3A02G180300.1	1.66203	0.0101738	Peroxidase [Source:UniProtKB/TrEMBL;Acc:A0A1D5VJ27]
Up-regulated	5	Undisturbed	TraesCS7D02G524900.1	1.66123	0.00219777	polyamine oxidase-like
Up-regulated	5	Undisturbed	TraesCS5D02G103800.1	1.65433	0.00149404	2-alkenal reductase (NADP(+)-dependent)-like
Up-regulated	5	Undisturbed	TraesCS3D02G225500.1	1.65267	0.00097267	uncharacterized protein LOC109770081
Up-regulated	5	Undisturbed	TraesCS3A02G227700.1	1.65068	0.00672207	unnamed protein product
Up-regulated	5	Undisturbed	TraesCS5D02G191500.1	1.64448	0.00836443	sulfite exporter TauE/SafE family protein 3
Up-regulated	5	Undisturbed	TraesCS6A02G249200.1	1.63797	0.00184113	Expansin-B11
Up-regulated	5	Undisturbed	TraesCS1D02G121200.3	1.63774	2.64774e-06	heat shock 70 kDa protein 14-like
Up-regulated	5	Undisturbed	TraesCS5B02G170100.1	1.63748	0.00210656	enoyl-[acyl-carrier-protein] reductase [NADH] 2, chloroplastic
Up-regulated	5	Undisturbed	TraesCS2B02G021500.1	1.63405	0.0119869	Cysteine-rich receptor-like protein kinase 10
Up-regulated	5	Undisturbed	TraesCS4D02G190900.1	1.63207	0.0401281	Laccase [Source:UniProtKB/TrEMBL;Acc:W5EK69]
Up-regulated	5	Undisturbed	TraesCS2A02G523300.1	1.63125	0.0146059	beta-D-xylosidase 4-like
Up-regulated	5	Undisturbed	TraesCS5D02G509800.1	1.63107	1.65685e-07	elongation factor 2-like
Up-regulated	5	Undisturbed	TraesCS1D02G215900.1	1.62971	0.000631524	Pyruvate kinase [Source:UniProtKB/TrEMBL;Acc:A0A1D5SY21]
Up-regulated	5	Undisturbed	TraesCS2B02G173400.1	1.62852	0.0366418	Peroxidase [Source:UniProtKB/TrEMBL;Acc:W5BJM9]
Up-regulated	5	Undisturbed	TraesCS1D02G413600.1	1.62729	0.00467485	sugar transporter ERD6-like 4
Up-regulated	5	Undisturbed	TraesCSU02G210100.1	1.62489	0.0463903	putative glycine-rich cell wall structural protein 1
Up-regulated	5	Undisturbed	TraesCS3B02G427400.1	1.62298	0.0319792	extensin-1-like
Up-regulated	5	Undisturbed	TraesCS2B02G037700.1	1.62286	0.0223309	cytochrome P450 89A2-like
Up-regulated	5	Undisturbed	TraesCS1B02G139600.1	1.62207	0.000515978	heat shock 70 kDa protein 14-like
Up-regulated	5	Undisturbed	TraesCS6D02G313100.1	1.61806	0.000515854	ferredoxin--nitrite reductase, chloroplastic
Up-regulated	5	Undisturbed	TraesCS1B02G267300.1	1.61567	0.0133311	WAT1-related protein [Source:UniProtKB/TrEMBL;Acc:A0A1D5SEQ1]
Up-regulated	5	Undisturbed	TraesCS7D02G550700.2	1.61539	0.0182005	delta(24)-sterol reductase
Up-regulated	5	Undisturbed	TraesCS4D02G357200.1	1.61528	0.0020614	stem 28 kDa glycoprotein-like
Up-regulated	5	Undisturbed	TraesCS5D02G212300.1	1.61131	0.0390715	uncharacterized protein LOC109772065
Up-regulated	5	Undisturbed	TraesCS1A02G357200.1	1.61002	3.46429e-07	6-phosphogluconate dehydrogenase, decarboxylating [Source:UniProtKB/TrEMBL;Acc:A0A341NU59]
Up-regulated	5	Undisturbed	TraesCS1D02G434700.1	1.59996	0.00834587	uncharacterized protein LOC109770508
Up-regulated	5	Undisturbed	TraesCS5A02G331500.1	1.59971	1.2863e-07	Acyl carrier protein [Source:UniProtKB/TrEMBL;Acc:A0A1D5YDS1]
Up-regulated	5	Undisturbed	TraesCS2D02G126400.1	1.59719	0.00112091	berberine bridge enzyme-like 18
Up-regulated	5	Undisturbed	TraesCS4A02G452700.3	1.59579	0.000964238	ruBisCO large subunit-binding protein subunit beta, chloroplastic
Up-regulated	5	Undisturbed	TraesCS3D02G219600.1	1.59241	0.0140857	potassium channel AKT1
Up-regulated	5	Undisturbed	TraesCS1B02G225800.1	1.59069	0.00154242	Pollen allergen homolog [Source:UniProtKB/TrEMBL;Acc:Q9ZR84]
Up-regulated	5	Undisturbed	TraesCS1A02G212000.1	1.59034	0.0131605	Expansin-B6
Up-regulated	5	Undisturbed	TraesCS2B02G528300.2	1.58789	0.000260374	Glutamine synthetase [Source:UniProtKB/TrEMBL;Acc:A0A1D5TVU1]
Up-regulated	5	Undisturbed	TraesCS1B02G400300.2	1.58683	0.0164943	ATP synthase subunit beta [Source:UniProtKB/TrEMBL;Acc:A0A341P7T5]
Up-regulated	5	Undisturbed	TraesCS3D02G504200.1	1.58156	0.0446995	probable mannan synthase 11
Up-regulated	5	Undisturbed	TraesCS6D02G099400.1	1.58007	0.0030984	Terpene cyclase/mutase family member [Source:UniProtKB/TrEMBL;Acc:A0A1D6BFR1]
Up-regulated	5	Undisturbed	TraesCS2D02G350200.1	1.57763	0.0008292	cytochrome b561 and DOMON domain-containing protein At3g07570-like
Up-regulated	5	Undisturbed	TraesCS4B02G300100.2	1.57585	0.0361845	Phytoene desaturase enzyme [Source:UniProtKB/TrEMBL;Acc:C4PW00]
Up-regulated	5	Undisturbed	TraesCS3B02G104700.1	1.5737	0.0256583	protein trichome birefringence-like 18
Up-regulated	5	Undisturbed	TraesCS1A02G330200.1	1.57098	0.00231919	Lipoyl synthase, chloroplastic [Source:UniProtKB/TrEMBL;Acc:A0A1D5RPT1]
Up-regulated	5	Undisturbed	TraesCS2B02G370600.1	1.57068	0.0377323	endoglucanase 12
Up-regulated	5	Undisturbed	TraesCS2D02G151500.1	1.5699	0.0109446	berberine bridge enzyme-like 27
Up-regulated	5	Undisturbed	TraesCS6B02G191000.1	1.56796	0.0463646	uncharacterized protein LOC109779598
Up-regulated	5	Undisturbed	TraesCS5B02G517500.1	1.56221	0.00498214	Cellulose synthase [Source:UniProtKB/TrEMBL;Acc:A0A341VNV6]
Up-regulated	5	Undisturbed	TraesCS1D02G059700.2	1.56207	0.029243	proteoglycan 4-like
Up-regulated	5	Undisturbed	TraesCS2D02G010700.1	1.54884	7.82023e-05	Pyruvate dehydrogenase E1 component subunit alpha [Source:UniProtKB/TrEMBL;Acc:W5C3E3]
Up-regulated	5	Undisturbed	TraesCS5A02G467600.1	1.54525	0.0498179	ABC transporter C family member 14-like
Up-regulated	5	Undisturbed	TraesCS6D02G171800.1	1.54525	1.13654e-06	Aminopeptidase [Source:UniProtKB/TrEMBL;Acc:W5H4V8]
Up-regulated	5	Undisturbed	TraesCS3D02G185200.1	1.54219	8.49625e-05	Peroxidase [Source:UniProtKB/TrEMBL;Acc:A0A1D5WSQ2]
Up-regulated	5	Undisturbed	TraesCS7D02G434400.1	1.54135	0.0133945	uncharacterized protein LOC109786314
Up-regulated	5	Undisturbed	TraesCS7B02G065500.1	1.53796	6.53628e-05	3-oxoacyl-[acyl-carrier-protein] synthase [Source:UniProtKB/TrEMBL;Acc:A0A1D6CIZ6]
Up-regulated	5	Undisturbed	TraesCS4B02G280100.1	1.5377	0.0370985	annexin D4-like
Up-regulated	5	Undisturbed	TraesCS5B02G184700.1	1.53627	1.30496e-05	sulfite exporter TauE/SafE family protein 3
Up-regulated	5	Undisturbed	TraesCS4B02G225100.1	1.53462	0.0325808	glucan endo-1,3-beta-glucosidase 10-like
Up-regulated	5	Undisturbed	TraesCS3A02G246600.1	1.53411	0.00188315	fasciclin-like arabinogalactan protein 11
Up-regulated	5	Undisturbed	TraesCS5D02G262400.1	1.52955	0.00585372	probable LRR receptor-like serine/threonine-protein kinase At4g26540
Up-regulated	5	Undisturbed	TraesCS4D02G175600.4	1.52779	0.00180384	guanine nucleotide exchange factor SPIKE 1
Up-regulated	5	Undisturbed	TraesCS5B02G221400.1	1.52358	0.0459522	AUGMIN subunit 8-like
Up-regulated	5	Undisturbed	TraesCS4B02G353100.1	1.52331	0.00649287	3-hydroxy-3-methylglutaryl coenzyme A synthase [Source:UniProtKB/TrEMBL;Acc:A0A341UJR1]
Up-regulated	5	Undisturbed	TraesCS5B02G001700.1	1.52228	0.0196143	phosphatidylinositol 4-phosphate 5-kinase 2-like
Up-regulated	5	Undisturbed	TraesCS1A02G099100.1	1.51834	0.00407165	probable mixed-linked glucan synthase 8
Up-regulated	5	Undisturbed	TraesCS2B02G012500.1	1.51595	0.00571394	Pyruvate dehydrogenase E1 component subunit alpha [Source:UniProtKB/TrEMBL;Acc:A0A1D5UF06]
Up-regulated	5	Undisturbed	TraesCS5D02G253700.1	1.51145	2.63247e-06	Glucose-6-phosphate isomerase [Source:UniProtKB/TrEMBL;Acc:W5FY62]
Up-regulated	5	Undisturbed	TraesCS6B02G296300.1	1.50588	0.0196711	myb family transcription factor PHL11-like
Up-regulated	5	Undisturbed	TraesCS5A02G388400.1	1.50532	0.0323043	beta-D-glucan exohydrolase, isoenzyme ExoII
Up-regulated	5	Undisturbed	TraesCS3A02G361100.1	1.50009	0.00620263	Laccase [Source:UniProtKB/TrEMBL;Acc:A0A1D5V9G0]
Up-regulated	5	Undisturbed	TraesCS7D02G359500.1	1.49965	0.00839329	Beta-galactosidase [Source:UniProtKB/TrEMBL;Acc:A0A1D6CMU2]
Up-regulated	5	Undisturbed	TraesCS2A02G352800.1	1.49849	0.000106653	Endoglucanase [Source:UniProtKB/TrEMBL;Acc:A0A341Q8R4]
Up-regulated	5	Undisturbed	TraesCS7D02G405200.1	1.48695	0.0282728	uncharacterized protein LOC109746800
Up-regulated	5	Undisturbed	TraesCS4D02G236900.1	1.4867	0.045824	squalene monooxygenase-like
Up-regulated	5	Undisturbed	TraesCS1A02G213000.1	1.48481	0.000146487	Pyruvate kinase [Source:UniProtKB/TrEMBL;Acc:A0A341NP87]
Up-regulated	5	Undisturbed	TraesCS5B02G209800.1	1.48331	0.0301609	probable cinnamyl alcohol dehydrogenase 8D
Up-regulated	5	Undisturbed	TraesCS6D02G325100.1	1.48194	0.0294136	alpha-aminoadipic semialdehyde synthase
Up-regulated	5	Undisturbed	TraesCSU02G113200.1	1.4802	0.0463936	Peroxidase [Source:UniProtKB/TrEMBL;Acc:A0A1D6DK53]
Up-regulated	5	Undisturbed	TraesCS5B02G489600.1	1.47713	0.00162212	Dihydrolipoamide acetyltransferase component of pyruvate dehydrogenase complex [Source:UniProtKB/TrEMBL;Acc:A0A1D5ZBP2]
Up-regulated	5	Undisturbed	TraesCS6A02G382900.1	1.4762	0.00311614	Germin-like protein 1-1
Up-regulated	5	Undisturbed	TraesCS1D02G130200.1	1.47281	0.00471762	Peroxidase [Source:UniProtKB/TrEMBL;Acc:W5ANF5]
Up-regulated	5	Undisturbed	TraesCS5D02G398500.1	1.47033	0.0351096	beta-D-glucan exohydrolase
Up-regulated	5	Undisturbed	TraesCS7D02G481600.1	1.46566	0.0341964	uncharacterized protein LOC109732012
Up-regulated	5	Undisturbed	TraesCS7D02G442500.1	1.46365	0.0498442	uncharacterized protein LOC109768958
Up-regulated	5	Undisturbed	TraesCS7A02G115300.1	1.4627	0.0201029	GDSL esterase/lipase At5g45910-like
Up-regulated	5	Undisturbed	TraesCS1B02G073700.1	1.46159	0.0347723	probable uridine nucleosidase 2
Up-regulated	5	Undisturbed	TraesCS2A02G018500.1	1.45525	0.00243019	probable apyrase 3
Up-regulated	5	Undisturbed	TraesCS2B02G066100.1	1.44839	0.0192125	tricetin 3',4',5'-O-trimethyltransferase-like
Up-regulated	5	Undisturbed	TraesCS6A02G302400.1	1.44769	0.0068894	uncharacterized protein LOC109741220
Up-regulated	5	Undisturbed	TraesCS2B02G080000.1	1.44531	8.73377e-06	Glucose-6-phosphate 1-dehydrogenase [Source:UniProtKB/TrEMBL;Acc:A0A341QJP0]
Up-regulated	5	Undisturbed	TraesCS2D02G027100.1	1.44069	0.0035601	cytochrome P450 89A2-like
Up-regulated	5	Undisturbed	TraesCS1B02G206900.1	1.43567	0.0203347	mitochondrial carnitine/acylcarnitine carrier-like protein
Up-regulated	5	Undisturbed	TraesCS2B02G344600.1	1.43545	0.0033741	14-3-3 protein [Source:UniProtKB/TrEMBL;Acc:G5DFC5]
Up-regulated	5	Undisturbed	TraesCS1B02G373600.1	1.43532	0.000172334	6-phosphogluconate dehydrogenase, decarboxylating [Source:UniProtKB/TrEMBL;Acc:A0A1D5SCW4]
Up-regulated	5	Undisturbed	TraesCS7A02G370200.1	1.43504	0.000518268	Enoyl-[acyl-carrier-protein] reductase [NADH], chloroplastic
Up-regulated	5	Undisturbed	TraesCS2A02G010100.1	1.43447	6.3074e-06	Pyruvate dehydrogenase E1 component subunit alpha [Source:UniProtKB/TrEMBL;Acc:A0A1D5TM13]
Up-regulated	5	Undisturbed	TraesCS4D02G191300.1	1.43242	0.00656973	Malonyl-CoA-acyl carrier protein transacylase, mitochondrial
Up-regulated	5	Undisturbed	TraesCS4D02G022300.1	1.43053	0.0221587	Dirigent protein [Source:UniProtKB/TrEMBL;Acc:A0A1D6S059]
Up-regulated	5	Undisturbed	TraesCS2B02G615000.1	1.43023	0.040848	Peroxidase [Source:UniProtKB/TrEMBL;Acc:A0A1D5TUQ6]
Up-regulated	5	Undisturbed	TraesCS7B02G436700.1	1.42512	0.0360851	senescence-specific cysteine protease SAG39-like
Up-regulated	5	Undisturbed	TraesCS4B02G248500.2	1.42426	0.023897	protein transport protein Sec61 subunit alpha-like
Up-regulated	5	Undisturbed	TraesCS1D02G351500.1	1.42168	0.00388704	malate dehydrogenase, chloroplastic-like
Up-regulated	5	Undisturbed	TraesCS7B02G478500.1	1.42046	0.0215553	Dirigent protein
Up-regulated	5	Undisturbed	TraesCS2D02G321800.1	1.41722	0.0340972	Aldose 1-epimerase [Source:UniProtKB/TrEMBL;Acc:A0A1D5UH46]
Up-regulated	5	Undisturbed	TraesCS3A02G239300.1	1.4172	0.000224978	Pyruvate kinase [Source:UniProtKB/TrEMBL;Acc:A0A1D5V7B0]
Up-regulated	5	Undisturbed	TraesCS2B02G296500.1	1.41709	0.000256845	3-oxoacyl-[acyl-carrier-protein] reductase 4-like
Up-regulated	5	Undisturbed	TraesCS4A02G457600.1	1.4168	0.0463941	membrane protein of ER body-like protein
Up-regulated	5	Undisturbed	TraesCS4A02G114200.1	1.41662	0.00973931	Malonyl-CoA-acyl carrier protein transacylase, mitochondrial
Up-regulated	5	Undisturbed	TraesCS5B02G186100.2	1.41362	0.000208396	protein transport protein Sec61 subunit alpha-like
Up-regulated	5	Undisturbed	TraesCS7B02G293500.1	1.41121	0.0224591	sodium-coupled neutral amino acid transporter 2-like
Up-regulated	5	Undisturbed	TraesCS3B02G210000.1	1.41051	0.0044327	Peroxidase [Source:UniProtKB/TrEMBL;Acc:W5CY42]
Up-regulated	5	Undisturbed	TraesCS5A02G378900.1	1.41042	0.00659837	Lipoxygenase [Source:UniProtKB/TrEMBL;Acc:A0A1D5YBH2]
Up-regulated	5	Undisturbed	TraesCS5A02G476700.1	1.41037	6.31054e-06	Dihydrolipoamide acetyltransferase component of pyruvate dehydrogenase complex [Source:UniProtKB/TrEMBL;Acc:A0A341V5C3]
Up-regulated	5	Undisturbed	TraesCS6A02G281000.1	1.3979	0.00755903	hypothetical protein TRIUR3_15226
Up-regulated	5	Undisturbed	TraesCS1D02G145900.1	1.3975	0.0284662	pre-mRNA-processing factor 19
Up-regulated	5	Undisturbed	TraesCS2A02G372400.1	1.39618	0.0129812	probable beta-D-xylosidase 6
Up-regulated	5	Undisturbed	TraesCS2D02G321700.1	1.39413	0.0426353	Aldose 1-epimerase [Source:UniProtKB/TrEMBL;Acc:W5BVU0]
Up-regulated	5	Undisturbed	TraesCS5D02G126000.1	1.39325	0.00910749	Dihydrolipoamide acetyltransferase component of pyruvate dehydrogenase complex [Source:UniProtKB/TrEMBL;Acc:A0A341VV25]
Up-regulated	5	Undisturbed	TraesCS6D02G354800.1	1.38967	0.0263635	uncharacterized protein LOC109765613
Up-regulated	5	Undisturbed	TraesCS5A02G534000.1	1.38328	0.00112899	trans-cinnamate 4-monooxygenase-like
Up-regulated	5	Undisturbed	TraesCS4A02G276900.1	1.38311	0.0419598	shikimate kinase-like protein
Up-regulated	5	Undisturbed	TraesCS7B02G235100.1	1.3805	0.0358774	GDSL esterase/lipase At5g45910-like
Up-regulated	5	Undisturbed	TraesCS2D02G152600.1	1.38027	0.00839329	Peroxidase [Source:UniProtKB/TrEMBL;Acc:A0A341R5R9]
Up-regulated	5	Undisturbed	TraesCS7D02G108900.1	1.37874	0.0348375	GDSL esterase/lipase At5g45910-like
Up-regulated	5	Undisturbed	TraesCS2A02G337300.1	1.37805	0.00453115	14-3-3-like protein GF14-B
Up-regulated	5	Undisturbed	TraesCS5B02G374200.1	1.3761	0.00672207	methyl-CpG-binding domain-containing protein 11-like
Up-regulated	5	Undisturbed	TraesCS1A02G099500.3	1.3723	0.000120706	Dihydrolipoyl dehydrogenase [Source:UniProtKB/TrEMBL;Acc:A0A341NT76]
Up-regulated	5	Undisturbed	TraesCS4B02G014700.1	1.36569	0.000854429	5-methyltetrahydropteroyltriglutamate--homocysteine methyltransferase 1
Up-regulated	5	Undisturbed	TraesCS4B02G014700.2	1.36569	0.000854429	5-methyltetrahydropteroyltriglutamate--homocysteine methyltransferase 1
Up-regulated	5	Undisturbed	TraesCS2B02G082500.1	1.36379	1.65685e-07	Plastid acetyl-CoA carboxylase [Source:UniProtKB/TrEMBL;Acc:B2ZGL3]
Up-regulated	5	Undisturbed	TraesCS6A02G408300.1	1.36301	0.027007	Xyloglucan endotransglucosylase/hydrolase [Source:UniProtKB/TrEMBL;Acc:Q56TP1]
Up-regulated	5	Undisturbed	TraesCS7D02G303500.1	1.35798	0.00906059	external alternative NAD(P)H-ubiquinone oxidoreductase B2, mitochondrial-like
Up-regulated	5	Undisturbed	TraesCS2B02G370200.1	1.35348	0.0246656	cytochrome b561 and DOMON domain-containing protein At3g07570-like
Up-regulated	5	Undisturbed	TraesCS2D02G278000.1	1.35167	0.000407189	3-oxoacyl-[acyl-carrier-protein] reductase 4-like
Up-regulated	5	Undisturbed	TraesCS1D02G092700.1	1.35082	0.0352412	endo-1,3;1,4-beta-D-glucanase-like
Up-regulated	5	Undisturbed	TraesCS6D02G074300.1	1.3485	0.0202283	3-isopropylmalate dehydratase large subunit, chloroplastic
Up-regulated	5	Undisturbed	TraesCS2D02G477100.2	1.34582	0.00469528	methylmalonate-semialdehyde dehydrogenase [acylating], mitochondrial
Up-regulated	5	Undisturbed	TraesCS3B02G376800.1	1.34419	0.0244407	Expansin [Source:UniProtKB/TrEMBL;Acc:A0A077S188]
Up-regulated	5	Undisturbed	TraesCS2A02G357800.1	1.34103	0.0301609	calmodulin-binding receptor-like cytoplasmic kinase 3
Up-regulated	5	Undisturbed	TraesCS1D02G107400.2	1.34018	0.000146487	Dihydrolipoyl dehydrogenase [Source:UniProtKB/TrEMBL;Acc:W5AN92]
Up-regulated	5	Undisturbed	TraesCS2A02G548000.2	1.3386	0.0363489	protein DJ-1 homolog D
Up-regulated	5	Undisturbed	TraesCS1A02G100100.1	1.3362	0.0401201	endo-1,3;1,4-beta-D-glucanase-like
Up-regulated	5	Undisturbed	TraesCS6D02G085300.2	1.32824	0.0119148	phosphatidylinositol/phosphatidylcholine transfer protein SFH6-like
Up-regulated	5	Undisturbed	TraesCS7B02G202400.1	1.32733	0.0107074	predicted protein
Up-regulated	5	Undisturbed	TraesCS7B02G368100.1	1.32692	0.0140879	patellin-4
Up-regulated	5	Undisturbed	TraesCS5A02G172700.1	1.32583	6.53292e-05	Enoyl-[acyl-carrier-protein] reductase [NADH], chloroplastic
Up-regulated	5	Undisturbed	TraesCS3D02G333400.3	1.32409	0.00839329	protein MOR1
Up-regulated	5	Undisturbed	TraesCS3B02G209700.1	1.31825	0.0341823	Peroxidase [Source:UniProtKB/TrEMBL;Acc:W5D5A5]
Up-regulated	5	Undisturbed	TraesCS7D02G161500.1	1.31339	0.00128516	3-oxoacyl-[acyl-carrier-protein] synthase [Source:UniProtKB/TrEMBL;Acc:A0A1D6D438]
Up-regulated	5	Undisturbed	TraesCS7B02G461800.1	1.31169	0.00793776	polyamine oxidase-like
Up-regulated	5	Undisturbed	TraesCS4A02G264600.1	1.30805	0.00570485	UDP-glucose 6-dehydrogenase [Source:UniProtKB/TrEMBL;Acc:A0A341TXU6]
Up-regulated	5	Undisturbed	TraesCS1B02G283300.1	1.30796	0.0109187	soluble inorganic pyrophosphatase-like
Up-regulated	5	Undisturbed	TraesCS1D02G275800.2	1.30721	0.00672302	Ferredoxin [Source:UniProtKB/TrEMBL;Acc:A0A1D5SYP6]
Up-regulated	5	Undisturbed	TraesCSU02G005100.1	1.30571	0.0118717	Glycosyltransferase [Source:UniProtKB/TrEMBL;Acc:A0A1D5SI65]
Up-regulated	5	Undisturbed	TraesCS7A02G102400.2	1.30286	0.0195001	nucleosome assembly protein 1;1
Up-regulated	5	Undisturbed	TraesCS2A02G278900.2	1.30138	0.000739483	3-oxoacyl-[acyl-carrier-protein] reductase 4-like
Up-regulated	5	Undisturbed	TraesCS5A02G054300.1	1.29371	0.0174054	protein NETWORKED 1D-like
Up-regulated	5	Undisturbed	TraesCS5A02G254600.1	1.29329	0.0307634	probable LRR receptor-like serine/threonine-protein kinase At4g26540
Up-regulated	5	Undisturbed	TraesCS7B02G478800.1	1.28984	0.0256663	powdery mildew resistance protein
Up-regulated	5	Undisturbed	TraesCS5B02G260000.2	1.2896	0.0126329	Eukaryotic translation initiation factor 3 subunit E [Source:UniProtKB/TrEMBL;Acc:W5F8V5]
Up-regulated	5	Undisturbed	TraesCS2B02G200900.1	1.28563	0.0377323	Alpha-1,4-glucan-protein synthase [UDP-forming] 1
Up-regulated	5	Undisturbed	TraesCS1B02G210400.1	1.28197	0.0201669	lysine-specific demethylase JMJ706-like
Up-regulated	5	Undisturbed	TraesCS7D02G352900.1	1.28182	0.0033741	enoyl-[acyl-carrier-protein] reductase [NADH] 1, chloroplastic
Up-regulated	5	Undisturbed	TraesCS6A02G305200.2	1.27433	0.0386737	exocyst complex component SEC6
Up-regulated	5	Undisturbed	TraesCS1B02G226500.1	1.27371	0.00836443	Pyruvate kinase [Source:UniProtKB/TrEMBL;Acc:A0A1D5S7U7]
Up-regulated	5	Undisturbed	TraesCS4B02G398000.1	1.26614	0.0322437	kinesin-like protein KIN-14E
Up-regulated	5	Undisturbed	TraesCS5D02G337400.1	1.2654	0.000427906	Acyl carrier protein [Source:UniProtKB/TrEMBL;Acc:A0A1D5ZYC9]
Up-regulated	5	Undisturbed	TraesCS3D02G354900.1	1.26396	0.0231945	Laccase [Source:UniProtKB/TrEMBL;Acc:A0A1D5WJ35]
Up-regulated	5	Undisturbed	TraesCS2B02G612400.1	1.25751	0.0339106	Peroxidase [Source:UniProtKB/TrEMBL;Acc:A0A1D5TV00]
Up-regulated	5	Undisturbed	TraesCS7D02G454600.1	1.25609	0.0286308	patellin-4
Up-regulated	5	Undisturbed	TraesCS3D02G239500.1	1.25554	0.00089132	Pyruvate kinase [Source:UniProtKB/TrEMBL;Acc:A0A1D5WL62]
Up-regulated	5	Undisturbed	TraesCS5B02G210100.1	1.25392	0.0195921	aldehyde dehydrogenase family 7 member A1
Up-regulated	5	Undisturbed	TraesCS2B02G400300.1	1.25208	0.0198607	predicted protein
Up-regulated	5	Undisturbed	TraesCS2D02G176000.1	1.25206	0.0199627	3-oxoacyl-[acyl-carrier-protein] synthase II, chloroplastic-like
Up-regulated	5	Undisturbed	TraesCS3A02G385300.1	1.24361	0.0092875	patellin-3-like
Up-regulated	5	Undisturbed	TraesCS4A02G059900.1	1.24236	0.0104171	squalene monooxygenase-like
Up-regulated	5	Undisturbed	TraesCS3B02G578400.1	1.24236	0.045824	Abscisic stress-ripening protein 1
Up-regulated	5	Undisturbed	TraesCS5A02G138700.1	1.23715	0.011347	cysteine protease XCP1-like
Up-regulated	5	Undisturbed	TraesCS7D02G294300.1	1.232	0.0111994	CslF6 [Source:UniProtKB/TrEMBL;Acc:A0A0R6UPC9]
Up-regulated	5	Undisturbed	TraesCS4B02G365100.1	1.22852	0.0268945	trans-cinnamate 4-monooxygenase-like
Up-regulated	5	Undisturbed	TraesCS1D02G004700.1	1.22519	0.029243	Phospholipid-transporting ATPase [Source:UniProtKB/TrEMBL;Acc:A0A1D5T1I0]
Up-regulated	5	Undisturbed	TraesCS6D02G096000.1	1.22424	0.0121367	leucine-rich repeat extensin-like protein 7
Up-regulated	5	Undisturbed	TraesCS4B02G189900.1	1.22253	0.00100116	Malonyl-CoA-acyl carrier protein transacylase, mitochondrial
Up-regulated	5	Undisturbed	TraesCS2A02G352000.1	1.22235	0.0254918	cytochrome b561 and DOMON domain-containing protein At3g07570-like
Up-regulated	5	Undisturbed	TraesCS5A02G269300.1	1.22045	0.011122	3-hydroxy-3-methylglutaryl coenzyme A reductase [Source:UniProtKB/TrEMBL;Acc:A0A341V2A0]
Up-regulated	5	Undisturbed	TraesCS2D02G521400.1	1.21977	0.00560607	3-oxoacyl-[acyl-carrier-protein] synthase III, chloroplastic
Up-regulated	5	Undisturbed	TraesCS7D02G506300.1	1.21668	0.00301982	isoleucine--tRNA ligase, cytoplasmic
Up-regulated	5	Undisturbed	TraesCS2A02G151900.1	1.21194	0.0119148	H/ACA ribonucleoprotein complex subunit 4-like
Up-regulated	5	Undisturbed	TraesCS3B02G267800.1	1.21059	0.0208576	Pyruvate kinase [Source:UniProtKB/TrEMBL;Acc:A0A077S1E6]
Up-regulated	5	Undisturbed	TraesCS7A02G361600.1	1.2094	0.0101216	L-ascorbate oxidase-like
Up-regulated	5	Undisturbed	TraesCS2D02G525300.1	1.20091	0.000975612	beta-D-xylosidase 4-like
Up-regulated	5	Undisturbed	TraesCS6D02G261300.1	1.19802	0.03016	uncharacterized protein LOC109750554
Up-regulated	5	Undisturbed	TraesCS2A02G079500.1	1.19651	0.00169881	2-oxoglutarate dehydrogenase, mitochondrial-like
Up-regulated	5	Undisturbed	TraesCS2A02G351700.1	1.1946	0.0410526	uncharacterized protein LOC109744797
Up-regulated	5	Undisturbed	TraesCS5D02G490000.1	1.19359	0.00272203	Dihydrolipoamide acetyltransferase component of pyruvate dehydrogenase complex [Source:UniProtKB/TrEMBL;Acc:A0A1D5ZV85]
Up-regulated	5	Undisturbed	TraesCS4B02G306400.1	1.19319	0.015852	probable mitochondrial adenine nucleotide transporter BTL3
Up-regulated	5	Undisturbed	TraesCS3A02G266300.2	1.19018	0.034523	NADH-dependent glutamate synthase
Up-regulated	5	Undisturbed	TraesCS5D02G218400.1	1.18958	0.00489258	Aldehyde dehydrogenase 7B1 [Source:UniProtKB/TrEMBL;Acc:W5FWT6]
Up-regulated	5	Undisturbed	TraesCS2A02G168500.1	1.18804	0.0282728	3-oxoacyl-[acyl-carrier-protein] synthase II, chloroplastic-like
Up-regulated	5	Undisturbed	TraesCS4A02G390800.1	1.17984	0.0348229	putative cytochrome c oxidase subunit 5b-like
Up-regulated	5	Undisturbed	TraesCS3D02G421700.1	1.17463	0.00397954	stearoyl-[acyl-carrier-protein] 9-desaturase 2, chloroplastic
Up-regulated	5	Undisturbed	TraesCS1D02G099600.1	1.17392	0.0347723	Chromatin-remodeling complex ATPase [Source:UniProtKB/TrEMBL;Acc:W5AK23]
Up-regulated	5	Undisturbed	TraesCS3A02G526800.1	1.17363	0.0452543	pumilio homolog 1-like
Up-regulated	5	Undisturbed	TraesCS6D02G009100.1	1.16366	0.000811163	ruBisCO large subunit-binding protein subunit beta, chloroplastic-like
Up-regulated	5	Undisturbed	TraesCS7D02G271200.2	1.16315	0.0360373	kinesin-like protein KIN-7H [
Up-regulated	5	Undisturbed	TraesCS3A02G303200.1	1.15721	0.00456245	UDP-arabinopyranose mutase 1-like
Up-regulated	5	Undisturbed	TraesCS5A02G148600.1	1.15575	0.0188048	Peroxidase [Source:UniProtKB/TrEMBL;Acc:A0A1D6DI98]
Up-regulated	5	Undisturbed	TraesCS1B02G024200.1	1.15504	0.0365814	probable thionin-2.3
Up-regulated	5	Undisturbed	TraesCS1B02G290600.2	1.15092	0.00663245	Delta-1-pyrroline-5-carboxylate synthase [Source:UniProtKB/TrEMBL;Acc:Q58QF6]
Up-regulated	5	Undisturbed	TraesCS2D02G068100.1	1.15032	4.60415e-05	Plastid acetyl-CoA carboxylase [Source:UniProtKB/TrEMBL;Acc:B2ZGL4]
Up-regulated	5	Undisturbed	TraesCS6D02G337700.1	1.14919	0.0126567	golgin subfamily A member 4
Up-regulated	5	Undisturbed	TraesCS7D02G274700.1	1.14858	0.0401182	hypothetical protein TRIUR3_11020
Up-regulated	5	Undisturbed	TraesCS3D02G246000.1	1.14605	0.00798729	Callose synthase 12
Up-regulated	5	Undisturbed	TraesCS2A02G185500.2	1.14056	0.015668	Tubulin alpha chain [Source:UniProtKB/TrEMBL;Acc:A4K4Z3]
Up-regulated	5	Undisturbed	TraesCS7A02G055400.1	1.13391	0.0107074	BAG family molecular chaperone regulator 3-like
Up-regulated	5	Undisturbed	TraesCS4B02G005900.1	1.13155	0.0164761	geraniol 8-hydroxylase-like
Up-regulated	5	Undisturbed	TraesCS2B02G219200.1	1.13134	0.0106131	UDP-galactose transporter 2-like
Up-regulated	5	Undisturbed	TraesCS7D02G048200.1	1.12904	0.0159284	aspartyl protease family protein At5g10770-like
Up-regulated	5	Undisturbed	TraesCS7A02G298600.1	1.12621	0.0182005	probable mixed-linked glucan synthase 6
Up-regulated	5	Undisturbed	TraesCS2D02G404800.1	1.11591	0.0314898	Aquaporin PIP1-2
Up-regulated	5	Undisturbed	TraesCS2D02G102100.3	1.10787	0.0332209	Cellulose synthase [Source:UniProtKB/TrEMBL;Acc:A0A341R5W2]
Up-regulated	5	Undisturbed	TraesCS2A02G069400.1	1.10667	0.00011148	Plastid acetyl-CoA carboxylase [Source:UniProtKB/TrEMBL;Acc:B2ZGL2]
Up-regulated	5	Undisturbed	TraesCS1D02G412000.1	1.10561	0.028872	uncharacterized protein LOC109761983
Up-regulated	5	Undisturbed	TraesCS3A02G363400.1	1.09989	0.015148	Aldo-keto reductase family 4 member C10
Up-regulated	5	Undisturbed	TraesCS4B02G356800.1	1.09977	0.01299	cell wall invertase
Up-regulated	5	Undisturbed	TraesCS1D02G101300.1	1.09551	0.00895092	histidine--tRNA ligase, cytoplasmic
Up-regulated	5	Undisturbed	TraesCS5B02G300800.1	1.09446	0.0229857	Cysteine synthase [Source:UniProtKB/TrEMBL;Acc:D6QX85]
Up-regulated	5	Undisturbed	TraesCS1B02G343800.1	1.09305	0.0242499	Lipoyl synthase, chloroplastic [Source:UniProtKB/TrEMBL;Acc:A0A1D5S862]
Up-regulated	5	Undisturbed	TraesCS2B02G145700.1	1.09183	0.0350627	4-alpha-glucanotransferase DPE2
Up-regulated	5	Undisturbed	TraesCS4B02G005700.1	1.08908	0.0358774	cytochrome P450 72A14-like
Up-regulated	5	Undisturbed	TraesCS2A02G221300.1	1.08764	0.0310224	AAA-ATPase At3g50940-like
Up-regulated	5	Undisturbed	TraesCS3A02G400000.1	1.08719	0.00251394	fructokinase-1-like
Up-regulated	5	Undisturbed	TraesCS5B02G437100.2	1.07817	0.0106608	Glutamate dehydrogenase [Source:UniProtKB/TrEMBL;Acc:A0A341VUZ0]
Up-regulated	5	Undisturbed	TraesCS6B02G014300.1	1.07682	0.0370985	wali2
Up-regulated	5	Undisturbed	TraesCS4D02G050600.2	1.0761	0.0306081	UDP-glucose 6-dehydrogenase [Source:UniProtKB/TrEMBL;Acc:W5EQ69
Up-regulated	5	Undisturbed	TraesCS5A02G526200.1	1.07381	0.00546491	Beta-fructofuranosidase, insoluble isoenzyme 1
Up-regulated	5	Undisturbed	TraesCS3A02G437700.1	1.06039	0.00627432	metacaspase-1-like
Up-regulated	5	Undisturbed	TraesCS3B02G326200.1	1.0539	0.0398949	uncharacterized protein LOC109752887
Up-regulated	5	Undisturbed	TraesCS1D02G357200.1	1.05222	0.0215359	uncharacterized protein LOC109787540
Up-regulated	5	Undisturbed	TraesCS7D02G041800.1	1.05117	0.00163447	acyl-CoA-binding protein-like
Up-regulated	5	Undisturbed	TraesCS4B02G247300.1	1.05108	0.0217936	Purple acid phosphatase [Source:UniProtKB/TrEMBL;Acc:A0A1D5XH12]
Up-regulated	5	Undisturbed	TraesCS2D02G377200.1	1.04552	0.035574	Phenylalanine ammonia-lyase [Source:UniProtKB/TrEMBL;Acc:A0A1D5US28]
Up-regulated	5	Undisturbed	TraesCS2A02G545600.3	1.0348	0.0460859	Calreticulin
Up-regulated	5	Undisturbed	TraesCS3A02G459600.1	1.03045	0.0324408	uncharacterized protein LOC109776858
Up-regulated	5	Undisturbed	TraesCS2D02G076900.1	1.02651	0.0195001	2-oxoglutarate dehydrogenase, mitochondrial-like
Up-regulated	5	Undisturbed	TraesCS7B02G285200.1	1.02565	0.0355038	adenylate kinase 3-like
Up-regulated	5	Undisturbed	TraesCSU02G038900.1	1.02516	0.012322	probable xyloglucan glycosyltransferase 3
Up-regulated	5	Undisturbed	TraesCS4B02G364000.1	1.0228	0.0383722	stem 28 kDa glycoprotein-like
Up-regulated	5	Undisturbed	TraesCS2D02G132900.1	1.02027	0.0180469	ferredoxin-dependent glutamate synthase, chloroplastic
Up-regulated	5	Undisturbed	TraesCS3D02G394200.1	1.01988	0.00406332	fructokinase-1-like
Up-regulated	5	Undisturbed	TraesCS4B02G335100.1	1.01842	0.00428159	Aconitate hydratase [Source:UniProtKB/TrEMBL;Acc:A0A341U8D8]
Up-regulated	5	Undisturbed	TraesCS7A02G285000.1	1.01318	0.0268434	dicarboxylate transporter 2.1, chloroplastic-like
Up-regulated	5	Undisturbed	TraesCS1D02G410200.1	1.01219	0.00454078	GDP-mannose 3,5-epimerase 1
Up-regulated	5	Undisturbed	TraesCS4A02G015900.1	1.00674	0.0341609	alanine--glyoxylate aminotransferase 2 homolog 1
Up-regulated	5	Undisturbed	TraesCS4A02G393500.1	1.00633	0.0365814	acyl-CoA-binding protein-like
Up-regulated	5	Undisturbed	TraesCS4B02G021300.1	1.00089	0.0335308	Pyruvate kinase [Source:UniProtKB/TrEMBL;Acc:A0A1D5XS33]
Tags	Week	Disturbance	Name	logFC	FDR	Description
Up-regulated	5	Disturbed	TraesCS7D02G550700.1	12.6584	1.39134e-21	delta(24)-sterol reductase
Up-regulated	5	Disturbed	TraesCS2D02G135000.2	12.0601	3.54458e-42	protein transport protein SEC31 homolog B
Up-regulated	5	Disturbed	TraesCS3A02G192400.2	11.4374	9.87988e-26	Coatomer subunit beta [Source:UniProtKB/TrEMBL;Acc:A0A341RYE1]
Up-regulated	5	Disturbed	TraesCS2B02G119700.3	11.2067	1.19611e-16	Cellulose synthase [Source:UniProtKB/TrEMBL;Acc:A0A341QSJ4]
Up-regulated	5	Disturbed	TraesCS1D02G418100.1	11.1503	5.3275e-22	cation/H(+) antiporter 20-like
Up-regulated	5	Disturbed	TraesCS7B02G269300.1	11.1	1.76e-20	T-complex protein 1 subunit epsilon
Up-regulated	5	Disturbed	TraesCS7A02G336600.2	10.6895	1.55286e-12	Elongation factor G, mitochondrial [Source:UniProtKB/TrEMBL;Acc:A0A341XY08]
Up-regulated	5	Disturbed	TraesCS3D02G022900.2	10.6074	8.59697e-29	Plasma membrane Na+/H+ antiporter, expressed [Source:UniProtKB/TrEMBL;Acc:I0JTU6]
Up-regulated	5	Disturbed	TraesCS6A02G131400.2	10.6066	1.91686e-20	T-complex protein 1 subunit eta
Up-regulated	5	Disturbed	TraesCS1B02G251500.1	10.5978	1.23191e-11	Cation/H(+) antiporter 17
Up-regulated	5	Disturbed	TraesCS2D02G176200.1	10.246	4.6222e-24	uncharacterized protein LOC109746707
Up-regulated	5	Disturbed	TraesCS6B02G151900.2	10.2193	1.83132e-10	DNA-directed RNA polymerase subunit [Source:UniProtKB/TrEMBL;Acc:A0A341XB43]
Up-regulated	5	Disturbed	TraesCS4B02G300100.1	9.86334	1.53887e-13	Phytoene desaturase enzyme [Source:UniProtKB/TrEMBL;Acc:C4PW00]
Up-regulated	5	Disturbed	TraesCS5B02G283800.1	9.43426	2.83681e-10	beta-ureidopropionase-like
Up-regulated	5	Disturbed	TraesCS4D02G292900.3	9.27133	2.5692e-18	tubulin--tyrosine ligase-like protein 12
Up-regulated	5	Disturbed	TraesCS5A02G226600.1	8.96898	5.34761e-07	ATP-dependent 6-phosphofructokinase [Source:UniProtKB/TrEMBL;Acc:W5EW09]
Up-regulated	5	Disturbed	TraesCS1A02G207700.1	8.9119	2.01641e-08	tetratricopeptide repeat protein SKI3
Up-regulated	5	Disturbed	TraesCS4D02G087600.3	8.48035	1.23191e-11	CCR4-NOT transcription complex subunit 11-like
Up-regulated	5	Disturbed	TraesCS2A02G372200.3	8.06753	1.09105e-07	uncharacterized protein At4g17910-like
Up-regulated	5	Disturbed	TraesCS1D02G239500.1	7.97664	1.6402e-12	cation/H(+) antiporter 20-like
Up-regulated	5	Disturbed	TraesCS3D02G029400.2	7.55592	3.86327e-06	E3 ubiquitin-protein ligase [Source:UniProtKB/TrEMBL;Acc:A0A1D5WTX4]
Up-regulated	5	Disturbed	TraesCSU02G269400.1	7.49392	0.0093197	uncharacterized protein LOC113815793
Up-regulated	5	Disturbed	TraesCS2A02G150600.1	7.12372	8.45857e-06	Non-specific serine/threonine protein kinase [Source:UniProtKB/TrEMBL;Acc:A0A0D3R0R8]
Up-regulated	5	Disturbed	TraesCS4B02G325500.2	7.02818	3.12422e-17	protein NLP1-like
Up-regulated	5	Disturbed	TraesCS2D02G479100.2	6.82437	0.000227572	helicase-like transcription factor CHR28
Up-regulated	5	Disturbed	TraesCS7D02G496100.2	6.50261	5.29558e-10	uncharacterized protein LOC109747650
Up-regulated	5	Disturbed	TraesCS1A02G239300.1	6.20482	1.10162e-05	Cation/H(+) antiporter 17
Up-regulated	5	Disturbed	TraesCS7D02G399300.1	6.06586	0.000407189	uncharacterized protein LOC109743311
Up-regulated	5	Disturbed	TraesCS2B02G221600.3	5.85808	0.0463903	importin-5-like
Up-regulated	5	Disturbed	TraesCS3B02G339200.2	5.64723	6.59991e-07	protein PLASTID TRANSCRIPTIONALLY ACTIVE 12
Up-regulated	5	Disturbed	TraesCS2D02G142500.2	5.60324	2.93523e-05	protein Mo25-like
Up-regulated	5	Disturbed	TraesCS1A02G185900.2	5.47366	0.0124499	protein RRC1-like
Up-regulated	5	Disturbed	TraesCS1B02G213600.1	4.82772	0.000251666	probable methyltransferase PMT21
Up-regulated	5	Disturbed	TraesCS1B02G284000.1	4.74018	0.000319255	RING-H2 finger protein ATL74-like
Up-regulated	5	Disturbed	TraesCS3B02G551500.1	4.54368	0.0121088	uncharacterized protein LOC109747961
Up-regulated	5	Disturbed	TraesCS2D02G274200.3	4.45396	0.0252427	uncharacterized protein LOC109745658
Up-regulated	5	Disturbed	TraesCS5B02G059300.1	4.42129	6.31054e-06	Non-specific serine/threonine protein kinase [Source:UniProtKB/TrEMBL;Acc:A0A341VB71]
Up-regulated	5	Disturbed	TraesCS3A02G220200.1	4.31761	0.000205495	ervatamin-B-like
Up-regulated	5	Disturbed	TraesCS4A02G446600.2	4.29566	0.00230082	receptor kinase-like protein Xa21
Up-regulated	5	Disturbed	TraesCS4D02G021100.1	4.08837	4.87863e-06	agamous-like MADS-box protein AGL66
Up-regulated	5	Disturbed	TraesCS1A02G137800.1	4.06995	0.0310224	ubiquitin carboxyl-terminal hydrolase 9-like
Up-regulated	5	Disturbed	TraesCS4B02G059500.2	4.01324	0.00341023	probable zinc metalloprotease EGY3, chloroplastic
Up-regulated	5	Disturbed	TraesCS2A02G007500.2	3.74545	0.0254918	protein NRT1/ PTR FAMILY 8.5-like
Up-regulated	5	Disturbed	TraesCS5A02G038300.3	3.66752	0.0409143	Auxin response factor [Source:UniProtKB/TrEMBL;Acc:A0A1D5YTL4]
Up-regulated	5	Disturbed	TraesCS7B02G230200.1	3.55394	0.00179642	ENHANCER OF AG-4 protein 2
Up-regulated	5	Disturbed	TraesCS5A02G057400.1	3.51108	0.0195588	Non-specific serine/threonine protein kinase [Source:UniProtKB/TrEMBL;Acc:A0A341US46]
Up-regulated	5	Disturbed	TraesCS7B02G150400.2	3.47966	0.0349845	uncharacterized protein LOC109742499
Up-regulated	5	Disturbed	TraesCS4B02G244500.3	3.46977	0.000239671	probable glucan 1,3-alpha-glucosidase
Up-regulated	5	Disturbed	TraesCS5A02G258800.1	3.46121	4.43424e-07	Iron sulfur cluster assembly protein 1, mitochondrial
Up-regulated	5	Disturbed	TraesCS2B02G458400.1	3.46074	0.000231238	Growth regulating factor 4a-B1 [Source:UniProtKB/TrEMBL;Acc:A0A1D5U1P6]
Up-regulated	5	Disturbed	TraesCS2B02G195200.1	3.36459	0.0387273	protein argonaute 14-like
Up-regulated	5	Disturbed	TraesCS5B02G513700.1	3.35881	0.00656901	uncharacterized protein LOC109739580
Up-regulated	5	Disturbed	TraesCS6B02G244500.2	3.34798	0.033264	vesicle transport protein GOT1
Up-regulated	5	Disturbed	TraesCS3D02G232500.1	3.30551	6.60781e-06	ervatamin-B-like
Up-regulated	5	Disturbed	TraesCS1A02G245500.2	3.27954	0.0498913	methyltransferase-like protein 13
Up-regulated	5	Disturbed	TraesCS7D02G527800.1	3.26735	1.44131e-05	Zinc finger protein 7
Up-regulated	5	Disturbed	TraesCS5A02G049100.1	3.23717	0.0116007	NAC domain-containing protein 21/22-like
Up-regulated	5	Disturbed	TraesCS7A02G481800.1	3.20852	0.00260746	syntaxin-132-like
Up-regulated	5	Disturbed	TraesCS5D02G068700.1	3.11594	0.00282741	Non-specific serine/threonine protein kinase [Source:UniProtKB/TrEMBL;Acc:A0A341W9Q6]
Up-regulated	5	Disturbed	TraesCS7D02G491200.1	3.11405	1.75474e-08	Patatin [Source:UniProtKB/TrEMBL;Acc:W5I4L4]
Up-regulated	5	Disturbed	TraesCS7D02G145200.1	3.07315	0.00309544	LRR receptor-like serine/threonine-protein kinase FLS2
Up-regulated	5	Disturbed	TraesCS2D02G056500.1	3.01119	0.00438672	unnamed protein product
Up-regulated	5	Disturbed	TraesCS5A02G524200.1	2.99195	4.2438e-05	xyloglucan endotransglucosylase/hydrolase protein 31-like
Up-regulated	5	Disturbed	TraesCS5D02G098700.1	2.98852	0.0108461	putative disease resistance RPP13-like protein 3
Up-regulated	5	Disturbed	TraesCS6D02G223700.1	2.95292	0.00266931	ctenidin-1-like
Up-regulated	5	Disturbed	TraesCS3B02G442400.1	2.95238	0.00193608	ubiquitin carboxyl-terminal hydrolase 36-like
Up-regulated	5	Disturbed	TraesCS3A02G377100.1	2.94333	0.00807749	RING-H2 finger protein ATL73-like
Up-regulated	5	Disturbed	TraesCS3B02G409700.1	2.93074	0.00300443	RING-H2 finger protein ATL73-like
Up-regulated	5	Disturbed	TraesCS4A02G430100.1	2.92079	1.24897e-12	Dirigent protein [Source:UniProtKB/TrEMBL;Acc:A0A341TRA6]
Up-regulated	5	Disturbed	TraesCS3D02G275500.1	2.90907	0.0303043	NADP-dependent malic enzyme-like
Up-regulated	5	Disturbed	TraesCS3B02G011800.1	2.84194	0.000540651	O-acyltransferase WSD1-like
Up-regulated	5	Disturbed	TraesCS3D02G370200.1	2.83765	0.00114572	RING-H2 finger protein ATL73-like
Up-regulated	5	Disturbed	TraesCS6B02G359800.1	2.82525	1.66854e-05	auxin-induced protein 15A-like
Up-regulated	5	Disturbed	TraesCS2B02G087300.1	2.77266	0.00915876	wall-associated receptor kinase 3-like
Up-regulated	5	Disturbed	TraesCS2A02G182200.2	2.72965	0.0257325	DNA repair protein rhp54
Up-regulated	5	Disturbed	TraesCS2B02G008000.1	2.69844	1.16465e-05	protein PLANT CADMIUM RESISTANCE 2-like
Up-regulated	5	Disturbed	TraesCSU02G074700.1	2.66355	0.00199771	uncharacterized protein LOC109786486
Up-regulated	5	Disturbed	TraesCS2B02G544400.1	2.65847	0.000469873	unnamed protein product
Up-regulated	5	Disturbed	TraesCS4B02G370800.1	2.65792	0.0296886	HKT8 [Source:UniProtKB/TrEMBL;Acc:A6XCE1]
Up-regulated	5	Disturbed	TraesCS2D02G309000.1	2.6281	0.0257325	unnamed protein product
Up-regulated	5	Disturbed	TraesCS3A02G074600.1	2.56916	4.5363e-09	metallothionein-like protein type 2
Up-regulated	5	Disturbed	TraesCS3A02G200200.1	2.54442	0.00120868	protein DEHYDRATION-INDUCED 19 homolog 3-like
Up-regulated	5	Disturbed	TraesCS5A02G348400.1	2.53954	0.0389532	Flavin-containing monooxygenase [Source:UniProtKB/TrEMBL;Acc:A0A1D5YP16]
Up-regulated	5	Disturbed	TraesCS2D02G183800.1	2.53674	1.7675e-06	glycerophosphodiester phosphodiesterase GDPD6-like
Up-regulated	5	Disturbed	TraesCS5D02G545200.1	2.51903	0.0168298	ankyrin repeat domain-containing protein 2A-like
Up-regulated	5	Disturbed	TraesCS4A02G431454.1	2.51542	0.0299877	wall-associated receptor kinase 3-like
Up-regulated	5	Disturbed	TraesCS2D02G013300.1	2.50865	0.0394197	probable LRR receptor-like serine/threonine-protein kinase At3g47570
Up-regulated	5	Disturbed	TraesCS5D02G234200.1	2.50858	1.8254e-06	sugar transport protein 7-like
Up-regulated	5	Disturbed	TraesCS2B02G061300.1	2.50761	0.00498889	hypothetical protein TRIUR3_06930
Up-regulated	5	Disturbed	TraesCS2D02G452900.1	2.50468	0.000178058	receptor-like protein kinase FERONIA
Up-regulated	5	Disturbed	TraesCS1A02G132600.4	2.50348	0.0192125	Phospholipid-transporting ATPase [Source:UniProtKB/TrEMBL;Acc:A0A341NL47]
Up-regulated	5	Disturbed	TraesCS3B02G152200.1	2.49715	0.00154181	Glutathione S-transferase 1
Up-regulated	5	Disturbed	TraesCS7A02G270700.1	2.48551	0.0172662	Cytochrome P450 78A3
Up-regulated	5	Disturbed	TraesCS4A02G423600.1	2.48451	0.0418017	histone H1-like
Up-regulated	5	Disturbed	TraesCS7B02G205600.1	2.48077	0.021416	NAC domain-containing protein 21/22-like
Up-regulated	5	Disturbed	TraesCS6B02G093100.1	2.48067	0.0126329	Peptidyl-prolyl cis-trans isomerase [Source:UniProtKB/TrEMBL;Acc:Q93XQ6]
Up-regulated	5	Disturbed	TraesCS1B02G251600.1	2.45401	0.0238085	cytochrome P450 94A2-like
Up-regulated	5	Disturbed	TraesCS3B02G129800.5	2.43673	0.0307634	protein TWIN LOV 1
Up-regulated	5	Disturbed	TraesCS6B02G040800.1	2.43566	0.029243	uncharacterized protein LOC109784686
Up-regulated	5	Disturbed	TraesCS6D02G142200.5	2.42777	0.0230407	putative glucose-6-phosphate 1-epimerase
Up-regulated	5	Disturbed	TraesCS2D02G524100.1	2.42278	3.1229e-07	uncharacterized protein LOC109754939
Up-regulated	5	Disturbed	TraesCS2B02G372000.1	2.395	0.000408631	zinc finger protein CONSTANS-LIKE 4-like
Up-regulated	5	Disturbed	TraesCS7A02G540200.1	2.38848	2.26772e-05	uncharacterized protein LOC109782475
Up-regulated	5	Disturbed	TraesCS7B02G073500.1	2.38807	0.000466513	Aspartic proteinase nepenthesin-1
Up-regulated	5	Disturbed	TraesCS2B02G242000.1	2.38236	3.15083e-07	protein TsetseEP-like
Up-regulated	5	Disturbed	TraesCS3A02G491100.1	2.37923	0.02162	GPI-anchored protein LLG1-like
Up-regulated	5	Disturbed	TraesCS3B02G455800.1	2.36416	0.0483784	signal peptide peptidase-like 3
Up-regulated	5	Disturbed	TraesCS4B02G059100.2	2.3544	0.00193847	Glutathione S-transferase 2
Up-regulated	5	Disturbed	TraesCS5A02G294500.1	2.34056	1.8411e-05	hypothetical protein TRIUR3_00843
Up-regulated	5	Disturbed	TraesCS2B02G025900.1	2.33431	0.0420208	uncharacterized protein LOC109773657
Up-regulated	5	Disturbed	TraesCS7A02G381700.1	2.32176	0.0417291	protein NRT1/ PTR FAMILY 8.3-like
Up-regulated	5	Disturbed	TraesCS3D02G141100.1	2.31537	0.00105321	metallothionein-like protein type 3
Up-regulated	5	Disturbed	TraesCS7A02G427100.1	2.30823	0.00267934	Xyloglucan endotransglucosylase/hydrolase [Source:UniProtKB/TrEMBL;Acc:A0A1D6BP89]
Up-regulated	5	Disturbed	TraesCS5D02G234100.1	2.30291	0.00431119	sugar transport protein 7-like
Up-regulated	5	Disturbed	TraesCS4A02G022100.1	2.29943	0.0359321	protein PAM68, chloroplastic
Up-regulated	5	Disturbed	TraesCS7D02G509600.1	2.29484	7.47505e-05	uncharacterized protein LOC109735362
Up-regulated	5	Disturbed	TraesCS7D02G381700.1	2.28955	0.000469873	uncharacterized protein LOC109784499
Up-regulated	5	Disturbed	TraesCS6B02G015100.1	2.26418	3.78047e-08	Bidirectional sugar transporter SWEET [Source:UniProtKB/TrEMBL;Acc:A0A1D6AWP3]
Up-regulated	5	Disturbed	TraesCS4D02G174700.1	2.26163	0.00217189	2,3-bisphosphoglycerate-independent phosphoglycerate mutase-like
Up-regulated	5	Disturbed	TraesCS6B02G288700.1	2.26005	2.73417e-07	RING-H2 finger protein ATL8-like
Up-regulated	5	Disturbed	TraesCS2D02G028500.1	2.22195	0.0184804	1-aminocyclopropane-1-carboxylate oxidase homolog 1-like
Up-regulated	5	Disturbed	TraesCS6A02G041700.1	2.21761	8.49387e-08	Catalase [Source:UniProtKB/TrEMBL;Acc:W5GEI6]
Up-regulated	5	Disturbed	TraesCS3B02G091000.1	2.2165	0.00326736	BTB/POZ and MATH domain-containing protein 1-like
Up-regulated	5	Disturbed	TraesCS7B02G420000.1	2.20972	0.0410389	putative FBD-associated F-box protein At1g55030
Up-regulated	5	Disturbed	TraesCS3B02G044400.1	2.20369	1.85018e-08	unnamed protein product
Up-regulated	5	Disturbed	TraesCS1B02G055200.1	2.20151	0.00836443	R2R3-MYB protein
Up-regulated	5	Disturbed	TraesCS5A02G083100.2	2.19477	3.94655e-06	myb-related protein MYBAS2-like
Up-regulated	5	Disturbed	TraesCS2D02G524200.1	2.19173	3.1747e-08	uncharacterized protein LOC109768636
Up-regulated	5	Disturbed	TraesCS7A02G238900.2	2.18579	0.00045103	Pyruvate dehydrogenase E1 component subunit alpha [Source:UniProtKB/TrEMBL;Acc:A0A1D6BY19]
Up-regulated	5	Disturbed	TraesCS1B02G392100.1	2.17859	0.00368304	unnamed protein product
Up-regulated	5	Disturbed	TraesCS7A02G539900.1	2.17065	0.0171102	uncharacterized protein LOC109782482
Up-regulated	5	Disturbed	TraesCS6A02G106000.3	2.16242	0.00387113	thiosulfate sulfurtransferase 18-like
Up-regulated	5	Disturbed	TraesCS2B02G138200.1	2.16229	0.00763803	hypothetical protein TRIUR3_29094
Up-regulated	5	Disturbed	TraesCS3B02G455500.1	2.15283	0.0443981	endo-1,3;1,4-beta-D-glucanase-like
Up-regulated	5	Disturbed	TraesCS6D02G242100.1	2.14177	4.80636e-05	RING-H2 finger protein ATL8-like
Up-regulated	5	Disturbed	TraesCS3B02G078100.1	2.13818	0.0135207	RNA exonuclease 4-like
Up-regulated	5	Disturbed	TraesCS5B02G235600.2	2.12183	0.0231176	bZIP transcription factor TRAB1-like
Up-regulated	5	Disturbed	TraesCS5A02G216400.1	2.11945	1.16136e-11	uncharacterized protein LOC109751400
Up-regulated	5	Disturbed	TraesCS1A02G197100.1	2.1132	9.82701e-08	cytochrome P450 85A1-like
Up-regulated	5	Disturbed	TraesCS5B02G550800.1	2.10799	0.0193049	aspartokinase 1, chloroplastic-like
Up-regulated	5	Disturbed	TraesCS5A02G354600.1	2.10356	0.0437921	RING-H2 finger protein ATL80-like
Up-regulated	5	Disturbed	TraesCS3D02G211300.1	2.10167	0.0354564	calcineurin B-like protein 9
Up-regulated	5	Disturbed	TraesCS4A02G211200.1	2.09514	0.0083478	hypothetical protein TRIUR3_22170
Up-regulated	5	Disturbed	TraesCS5D02G266600.1	2.09149	0.0032156	plant UBX domain-containing protein 10-like
Up-regulated	5	Disturbed	TraesCS7A02G504100.1	2.08771	0.000235242	Patatin [Source:UniProtKB/TrEMBL;Acc:A0A1D6BN66]
Up-regulated	5	Disturbed	TraesCS3A02G528900.1	2.08708	1.09402e-08	vacuolar-processing enzyme-like
Up-regulated	5	Disturbed	TraesCS5B02G235600.1	2.08566	0.010157	bZIP transcription factor TRAB1-like
Up-regulated	5	Disturbed	TraesCS7B02G168800.1	2.08185	0.000178058	cytochrome P450 monooxygenase
Up-regulated	5	Disturbed	TraesCS4B02G015900.1	2.07974	0.0443993	uncharacterized protein LOC109747833
Up-regulated	5	Disturbed	TraesCS5D02G492900.1	2.06748	0.00763404	heat shock cognate 70 kDa protein 2-like
Up-regulated	5	Disturbed	TraesCS4A02G166000.1	2.06229	0.000938159	hypothetical protein TRIUR3_20315
Up-regulated	5	Disturbed	TraesCS4D02G042200.1	2.05649	3.98901e-08	chemocyanin-like
Up-regulated	5	Disturbed	TraesCS7B02G283000.1	2.04637	0.00672302	Fructose-bisphosphate aldolase [Source:UniProtKB/TrEMBL;Acc:A0A1D6C852]
Up-regulated	5	Disturbed	TraesCS2A02G074300.1	2.04542	0.000808467	uncharacterized protein LOC109782883
Up-regulated	5	Disturbed	TraesCS1A02G092100.1	2.0374	0.017544	indole-2-monooxygenase-like
Up-regulated	5	Disturbed	TraesCS1B02G109100.1	2.03557	0.0470536	probable calcium-binding protein CML22
Up-regulated	5	Disturbed	TraesCS4A02G027700.1	2.03414	0.000129153	heat shock factor HsfA2e
Up-regulated	5	Disturbed	TraesCS1A02G305600.1	2.0334	0.0244383	hypothetical protein SETIT_3G199200v2
Up-regulated	5	Disturbed	TraesCS2B02G086300.1	2.0326	0.0010248	wall-associated receptor kinase 3-like
Up-regulated	5	Disturbed	TraesCS1D02G375600.1	2.03055	8.39553e-05	SAM-dependent methyltransferase
Up-regulated	5	Disturbed	TraesCS4A02G225400.1	2.02704	0.000701203	protein NRT1/ PTR FAMILY 4.3-like
Up-regulated	5	Disturbed	TraesCS6A02G076900.1	2.02555	0.0284662	tRNA A64-2'-O-ribosylphosphate transferase
Up-regulated	5	Disturbed	TraesCS1A02G219500.1	2.01682	0.0491204	Hexose carrier protein HEX6
Up-regulated	5	Disturbed	TraesCS4B02G262900.1	2.01617	0.00602443	putative polyol transporter 1
Up-regulated	5	Disturbed	TraesCS1D02G154700.1	2.01384	0.014365	Cytokinin riboside 5'-monophosphate phosphoribohydrolase [Source:UniProtKB/TrEMBL;Acc:W4ZZG6]
Up-regulated	5	Disturbed	TraesCS3B02G155300.1	2.01079	0.0465991	UMP-CMP kinase [Source:UniProtKB/TrEMBL;Acc:A0A1D5W7Y6]
Up-regulated	5	Disturbed	TraesCS3D02G447600.1	2.00822	0.0126625	psbP domain-containing protein 7, chloroplastic
Up-regulated	5	Disturbed	TraesCS6A02G001200.1	2.00358	1.70512e-10	Uncharacterized protein
Up-regulated	5	Disturbed	TraesCS2A02G049100.1	2.00012	0.0078186	uncharacterized protein LOC109767312
Up-regulated	5	Disturbed	TraesCS4A02G136500.1	1.99656	4.31201e-05	Non-specific serine/threonine protein kinase [Source:UniProtKB/TrEMBL;Acc:A0A341TSY0]
Up-regulated	5	Disturbed	TraesCS2D02G481800.1	1.99496	0.0389532	Anthocyanidin reductase
Up-regulated	5	Disturbed	TraesCS3B02G212500.1	1.99328	0.0378847	unnamed protein product
Up-regulated	5	Disturbed	TraesCS7A02G435500.1	1.98767	0.0226193	probable calcium-binding protein CML29
Up-regulated	5	Disturbed	TraesCS2D02G378100.1	1.98677	3.50139e-13	phosphoenolpyruvate carboxylase kinase 2-like
Up-regulated	5	Disturbed	TraesCSU02G234500.1	1.97491	0.0114175	subtilisin-like protease SBT3.6
Up-regulated	5	Disturbed	TraesCS2D02G048000.1	1.96762	0.0305138	uncharacterized protein
Up-regulated	5	Disturbed	TraesCS1A02G438600.1	1.96756	6.92473e-05	eukaryotic translation initiation factor 5B-like
Up-regulated	5	Disturbed	TraesCS3D02G136100.1	1.95964	0.0317136	protein PHLOEM PROTEIN 2-LIKE A1-like
Up-regulated	5	Disturbed	TraesCS5A02G173400.1	1.95925	0.032714	ultraviolet-B receptor UVR8
Up-regulated	5	Disturbed	TraesCS5B02G557300.2	1.95817	7.78526e-10	fructan exohydrolase
Up-regulated	5	Disturbed	TraesCS5B02G242000.1	1.95423	3.25811e-08	heavy metal-associated isoprenylated plant protein 20-like
Up-regulated	5	Disturbed	TraesCS1D02G005300.1	1.94909	0.00215406	putative NBS-LRR resistance protein
Up-regulated	5	Disturbed	TraesCS7A02G519900.1	1.94859	0.000370375	uncharacterized protein LOC109735362
Up-regulated	5	Disturbed	TraesCS4D02G109000.1	1.94708	0.0209255	leucine-rich repeat receptor protein kinase MSL1-like
Up-regulated	5	Disturbed	TraesCS4B02G044700.1	1.9433	0.0268926	chemocyanin-like
Up-regulated	5	Disturbed	TraesCS2B02G398900.1	1.93277	1.01718e-07	phosphoenolpyruvate carboxylase kinase 2-like
Up-regulated	5	Disturbed	TraesCS1B02G159000.1	1.93224	0.0258557	uncharacterized protein LOC109785639
Up-regulated	5	Disturbed	TraesCS6D02G365400.1	1.93151	0.0117518	cytochrome P450 716B1-like
Up-regulated	5	Disturbed	TraesCS5A02G301300.1	1.93036	0.0412952	uncharacterized protein LOC109733141
Up-regulated	5	Disturbed	TraesCS3D02G534200.2	1.92923	0.00656973	vacuolar-processing enzyme-like
Up-regulated	5	Disturbed	TraesCS2B02G007400.3	1.92691	0.00011234	L-type lectin-domain containing receptor kinase IX.1
Up-regulated	5	Disturbed	TraesCS5D02G130600.1	1.92501	0.0319428	nucleolar protein 6
Up-regulated	5	Disturbed	TraesCS2D02G368500.1	1.92468	0.0401497	uncharacterized protein At4g17910-like
Up-regulated	5	Disturbed	TraesCS1D02G043300.2	1.92335	3.44132e-07	myb-related protein MYBAS2-like
Up-regulated	5	Disturbed	TraesCS1A02G250700.1	1.9229	0.00509816	Sulfotransferase [Source:UniProtKB/TrEMBL;Acc:A0A096UJX3]
Up-regulated	5	Disturbed	TraesCS2B02G061900.1	1.92273	0.0193272	uncharacterized protein LOC109767312
Up-regulated	5	Disturbed	TraesCS4A02G150000.1	1.92122	0.0010616	oligouridylate-binding protein 1B-like
Up-regulated	5	Disturbed	TraesCS2D02G438300.1	1.91914	0.0329543	putative lipid-transfer protein DIR1
Up-regulated	5	Disturbed	TraesCS6A02G325900.2	1.90901	0.00485235	probable tyrosine-protein phosphatase At1g05000
Up-regulated	5	Disturbed	TraesCS3A02G523500.1	1.89737	0.000541663	wall-associated receptor kinase 4-like
Up-regulated	5	Disturbed	TraesCS2D02G070800.1	1.8954	0.00836443	wall-associated receptor kinase 3-like
Up-regulated	5	Disturbed	TraesCS5B02G060100.2	1.89513	0.0461035	VAN3-binding protein-like
Up-regulated	5	Disturbed	TraesCS1D02G357300.2	1.89096	0.00292354	CLP protease regulatory subunit CLPX1, mitochondrial-like
Up-regulated	5	Disturbed	TraesCS4D02G350700.1	1.89077	0.00692012	uncharacterized protein LOC109748233
Up-regulated	5	Disturbed	TraesCS3D02G534100.1	1.88482	0.00016283	vacuolar-processing enzyme gamma-isozyme-like
Up-regulated	5	Disturbed	TraesCS1B02G309000.1	1.88431	0.00629637	protein NUCLEAR FUSION DEFECTIVE 4-like
Up-regulated	5	Disturbed	TraesCS4A02G446600.1	1.87881	1.7495e-06	receptor kinase-like protein Xa21
Up-regulated	5	Disturbed	TraesCS4D02G083200.1	1.87484	0.00217408	protein NLP2-like
Up-regulated	5	Disturbed	TraesCS3D02G437100.2	1.87362	0.000866946	unnamed protein product
Up-regulated	5	Disturbed	TraesCS7A02G236000.1	1.87315	0.0454917	hypothetical protein TRIUR3_32739
Up-regulated	5	Disturbed	TraesCS7A02G007400.1	1.866	0.0290682	putative disease resistance RPP13-like protein 3
Up-regulated	5	Disturbed	TraesCS5A02G164900.1	1.86201	0.0222534	probable tyrosine-protein phosphatase At1g05000
Up-regulated	5	Disturbed	TraesCS6A02G329100.1	1.85936	0.0304905	auxin-responsive protein SAUR32-like
Up-regulated	5	Disturbed	TraesCS1A02G302600.1	1.85864	0.00231919	probable LRR receptor-like serine/threonine-protein kinase At1g06840
Up-regulated	5	Disturbed	TraesCS7D02G271100.1	1.85623	0.00409195	Cytochrome P450 monooxygenase [Source:UniProtKB/TrEMBL;Acc:A0A0K1LXY6]
Up-regulated	5	Disturbed	TraesCS3A02G420900.1	1.85282	0.0169265	uncharacterized protein LOC109748837
Up-regulated	5	Disturbed	TraesCS6B02G177600.1	1.85222	0.0359277	gamma-glutamyl peptidase 5-like
Up-regulated	5	Disturbed	TraesCS2A02G049300.1	1.8514	0.0475579	unnamed protein product
Up-regulated	5	Disturbed	TraesCS6B02G183000.1	1.84889	0.0010248	trihelix transcription factor ASR3
Up-regulated	5	Disturbed	TraesCS7A02G168600.1	1.84099	0.000263675	Aspartic proteinase nepenthesin-1
Up-regulated	5	Disturbed	TraesCS3D02G074400.1	1.84096	1.52741e-09	metallothionein
Up-regulated	5	Disturbed	TraesCS1D02G147000.1	1.83587	0.0341625	acyltransferase-like protein At1g54570, chloroplastic
Up-regulated	5	Disturbed	TraesCS7D02G420800.1	1.83525	0.000493555	Peroxidase [Source:UniProtKB/TrEMBL;Acc:W5HY39]
Up-regulated	5	Disturbed	TraesCS3D02G416400.1	1.83453	0.00358585	uncharacterized protein LOC109748837
Up-regulated	5	Disturbed	TraesCS2D02G048300.1	1.83439	0.0482798	uncharacterized protein LOC109756449
Up-regulated	5	Disturbed	TraesCS3A02G249200.1	1.8301	0.0323043	Peroxidase [Source:UniProtKB/TrEMBL;Acc:A0A1D5V861]
Up-regulated	5	Disturbed	TraesCS3D02G031000.1	1.82578	0.0130081	putative disease resistance protein RGA1
Up-regulated	5	Disturbed	TraesCS2A02G358100.1	1.82505	0.00910749	Adenine phosphoribosyltransferase 2
Up-regulated	5	Disturbed	TraesCS2D02G216500.1	1.825	0.00131242	uncharacterized protein LOC109787453
Up-regulated	5	Disturbed	TraesCS2A02G381600.1	1.8248	1.2789e-06	phosphoenolpyruvate carboxylase kinase 2-like
Up-regulated	5	Disturbed	TraesCS2A02G542700.1	1.82255	0.0132634	ethylene-responsive transcription factor 3-like
Up-regulated	5	Disturbed	TraesCS5D02G250700.1	1.81953	0.000543713	heavy metal-associated isoprenylated plant protein 20-like
Up-regulated	5	Disturbed	TraesCS5D02G301800.1	1.81813	0.000332731	uncharacterized protein LOC109752135
Up-regulated	5	Disturbed	TraesCS2B02G478700.1	1.81783	0.00480473	protein REVEILLE 7-like
Up-regulated	5	Disturbed	TraesCS6A02G009100.1	1.81602	0.00584747	Bidirectional sugar transporter SWEET [Source:UniProtKB/TrEMBL;Acc:W5GC93]
Up-regulated	5	Disturbed	TraesCS5D02G224500.1	1.8128	2.84038e-06	uncharacterized protein LOC109751400
Up-regulated	5	Disturbed	TraesCS2D02G106300.1	1.81145	0.0139621	Thiamine pyrophosphokinase [Source:UniProtKB/TrEMBL;Acc:W5C503]
Up-regulated	5	Disturbed	TraesCS6B02G221100.1	1.80763	0.00942061	peroxisomal membrane protein PMP22-like
Up-regulated	5	Disturbed	TraesCS3A02G535100.1	1.80479	5.09317e-08	MYB13 transcription factor [Source:UniProtKB/TrEMBL;Acc:S4V9N0]
Up-regulated	5	Disturbed	TraesCS4A02G098600.2	1.80379	0.0405835	Heat shock cognate 70 kDa protein
Up-regulated	5	Disturbed	TraesCS5B02G339600.1	1.80191	0.0231593	beta-1,3-galactosyltransferase GALT1
Up-regulated	5	Disturbed	TraesCS2B02G059700.1	1.80133	0.000439266	unnamed protein product
Up-regulated	5	Disturbed	TraesCS4A02G059500.1	1.79204	1.60943e-06	Inositol-tetrakisphosphate 1-kinase [Source:UniProtKB/TrEMBL;Acc:A0A1D5XAS7]
Up-regulated	5	Disturbed	TraesCS2A02G396000.1	1.79153	0.000595902	Superoxide-generating NADPH oxidase heavy chain subunit B
Up-regulated	5	Disturbed	TraesCS7B02G411200.1	1.79126	0.00357459	Patatin [Source:UniProtKB/TrEMBL;Acc:A0A1D6CAW9]
Up-regulated	5	Disturbed	TraesCS7D02G177000.1	1.78639	2.06803e-05	Blue copper protein
Up-regulated	5	Disturbed	TraesCS4D02G308000.1	1.78011	0.00620263	uncharacterized protein LOC109734544
Up-regulated	5	Disturbed	TraesCS7A02G280200.1	1.77847	0.0433819	hypothetical protein TRIUR3_21526
Up-regulated	5	Disturbed	TraesCS5D02G303000.1	1.77201	3.4132e-06	beta-glucosidase 32-like
Up-regulated	5	Disturbed	TraesCS1D02G043300.1	1.77053	0.0034003	myb-related protein MYBAS2-like
Up-regulated	5	Disturbed	TraesCS1D02G020619.1	1.77028	0.0177344	Disease resistance protein RPM1
Up-regulated	5	Disturbed	TraesCS6A02G235900.1	1.76977	0.0254918	Membrane steroid-binding protein 2
Up-regulated	5	Disturbed	TraesCS1A02G255000.1	1.76963	0.000424379	LEC14B protein
Up-regulated	5	Disturbed	TraesCS7B02G411100.1	1.76924	0.000978705	hydrophobic protein RCI2A-like
Up-regulated	5	Disturbed	TraesCS2B02G062800.1	1.76568	0.0301609	hypothetical protein TRIUR3_10753
Up-regulated	5	Disturbed	TraesCS5B02G441600.1	1.76465	6.52127e-05	stem-specific protein TSJT1-like
Up-regulated	5	Disturbed	TraesCS5B02G293800.1	1.7636	1.82856e-05	uncharacterized protein LOC109752143
Up-regulated	5	Disturbed	TraesCS4B02G310100.1	1.75865	0.0411873	serine/threonine-protein phosphatase PP-X isozyme 2
Up-regulated	5	Disturbed	TraesCS7A02G442500.1	1.75524	0.00630279	Glutathione synthetase [Source:UniProtKB/TrEMBL;Acc:A0A1D6BKB2]
Up-regulated	5	Disturbed	TraesCS2A02G258900.1	1.75508	0.00485621	uncharacterized protein LOC109740198
Up-regulated	5	Disturbed	TraesCS7B02G478000.1	1.74562	1.12736e-05	SPX domain-containing protein 3-like
Up-regulated	5	Disturbed	TraesCS3A02G514300.1	1.74021	0.0240805	F-box/FBD/LRR-repeat protein At1g13570-like
Up-regulated	5	Disturbed	TraesCS4B02G241700.1	1.73148	0.018623	uncharacterized protein LOC109775519
Up-regulated	5	Disturbed	TraesCS4B02G278100.1	1.73118	2.69649e-07	heat shock factor A6
Up-regulated	5	Disturbed	TraesCS1A02G067900.2	1.73047	0.000394686	tetraspanin-6
Up-regulated	5	Disturbed	TraesCS3B02G612200.2	1.72769	1.29914e-05	MYB protein [Source:UniProtKB/TrEMBL;Acc:I6U7F1]
Up-regulated	5	Disturbed	TraesCS6B02G005800.1	1.72413	0.00275516	vegetative cell wall protein gp1-like
Up-regulated	5	Disturbed	TraesCS2A02G047900.1	1.72336	0.014069	hypothetical protein TRIUR3_10753
Up-regulated	5	Disturbed	TraesCS5B02G215300.1	1.72088	2.4899e-05	uncharacterized protein LOC109751400
Up-regulated	5	Disturbed	TraesCS7A02G045900.1	1.71687	0.0108461	disease resistance protein RPM1-like
Up-regulated	5	Disturbed	TraesCS1D02G341100.1	1.71589	0.0240723	trehalose-phosphate synthase 1
Up-regulated	5	Disturbed	TraesCS3A02G246300.1	1.7154	0.0020614	Serine/threonine-protein kinase
Up-regulated	5	Disturbed	TraesCS3A02G414300.1	1.71503	0.000493555	hypothetical protein TRIUR3_15438
Up-regulated	5	Disturbed	TraesCS1D02G412400.2	1.71383	0.0284978	subtilisin-like protease SBT3.6
Up-regulated	5	Disturbed	TraesCS5B02G560700.1	1.7133	0.00041726	probable leucine-rich repeat receptor-like protein kinase At5g63930
Up-regulated	5	Disturbed	TraesCS3D02G512100.1	1.71137	0.000962706	Receptor-like protein kinase FERONIA
Up-regulated	5	Disturbed	TraesCS1B02G434200.2	1.71107	0.000915682	subtilisin-like protease SBT3.6
Up-regulated	5	Disturbed	TraesCS6A02G232300.1	1.70991	0.018522	bifunctional nitrilase/nitrile hydratase NIT4
Up-regulated	5	Disturbed	TraesCS6B02G419600.1	1.70969	0.0166879	cytochrome P450 716B1-like
Up-regulated	5	Disturbed	TraesCS5D02G383000.1	1.70641	2.17378e-08	nuclear transcription factor Y subunit A-10-like
Up-regulated	5	Disturbed	TraesCS7D02G012400.1	1.70513	0.00820652	dual specificity protein kinase pyk3-like
Up-regulated	5	Disturbed	TraesCS7B02G037500.1	1.70266	0.0255299	hypothetical protein TRIUR3_25928
Up-regulated	5	Disturbed	TraesCS3A02G313200.1	1.70059	0.000117746	Metallothionein-like protein type 3
Up-regulated	5	Disturbed	TraesCS1A02G042700.1	1.69817	7.13833e-06	myb-related protein MYBAS2-like
Up-regulated	5	Disturbed	TraesCS3A02G365800.1	1.69529	0.00124819	axi 1 like protein, putative, expressed
Up-regulated	5	Disturbed	TraesCS3D02G540600.1	1.69486	5.23427e-05	MYB-related protein [Source:UniProtKB/TrEMBL;Acc:G9DRA2]
Up-regulated	5	Disturbed	TraesCS2D02G373400.1	1.69026	0.0103314	mitogen-activated protein kinase 7
Up-regulated	5	Disturbed	TraesCS6B02G419800.1	1.69024	0.00942061	N/A
Up-regulated	5	Disturbed	TraesCS3A02G102900.1	1.68917	0.0253474	Transcription factor bHLH51
Up-regulated	5	Disturbed	TraesCS7A02G175400.1	1.68449	5.74455e-07	Blue copper protein
Up-regulated	5	Disturbed	TraesCS1A02G278400.1	1.67782	0.00182721	auxin transporter-like protein 2
Up-regulated	5	Disturbed	TraesCS7D02G061400.1	1.67753	0.00489258	histone H1-like
Up-regulated	5	Disturbed	TraesCS4B02G345600.1	1.67654	0.0238085	homeobox protein BEL1 homolog
Up-regulated	5	Disturbed	TraesCS1D02G119200.1	1.67606	0.00570485	uncharacterized protein LOC109784847
Up-regulated	5	Disturbed	TraesCS6D02G136600.2	1.67543	0.000280637	cinnamoyl-CoA reductase 2-like
Up-regulated	5	Disturbed	TraesCS4A02G059500.3	1.67132	0.000366916	Inositol-tetrakisphosphate 1-kinase [Source:UniProtKB/TrEMBL;Acc:A0A1D5XAS7]
Up-regulated	5	Disturbed	TraesCS7A02G382000.1	1.67057	0.0370985	putative calcium-binding protein CML21
Up-regulated	5	Disturbed	TraesCS2B02G315800.2	1.66771	0.0188725	nucleobase-ascorbate transporter 6-like
Up-regulated	5	Disturbed	TraesCS2D02G046800.1	1.66557	0.0235928	unnamed protein product
Up-regulated	5	Disturbed	TraesCS2D02G483300.1	1.66448	0.000274381	organic cation/carnitine transporter 4-like
Up-regulated	5	Disturbed	TraesCS2D02G470500.1	1.6633	0.0350627	polygalacturonase inhibitor-like
Up-regulated	5	Disturbed	TraesCS5A02G225100.3	1.66282	0.00581048	Bifunctional dihydroflavonol 4-reductase/flavanone 4-reductase
Up-regulated	5	Disturbed	TraesCS3B02G597900.1	1.66248	0.000150396	vacuolar-processing enzyme-like
Up-regulated	5	Disturbed	TraesCS4A02G210000.1	1.66157	2.29746e-06	proline-rich protein HaeIII subfamily 1-like [
Up-regulated	5	Disturbed	TraesCS4D02G153300.3	1.66099	0.00649287	uncharacterized protein LOC109768767
Up-regulated	5	Disturbed	TraesCS4A02G418900.1	1.65887	0.00504193	unnamed protein product
Up-regulated	5	Disturbed	TraesCS4B02G337000.3	1.65688	0.0125454	cyclin-dependent kinase inhibitor 5-like
Up-regulated	5	Disturbed	TraesCS4B02G197200.1	1.65682	0.00612098	phosphatidylinositol transfer protein 2-like
Up-regulated	5	Disturbed	TraesCSU02G187200.1	1.65042	0.00297182	putative lipid-transfer protein DIR1
Up-regulated	5	Disturbed	TraesCS7D02G188800.2	1.64968	0.0225601	Putative NOD26-like membrane integral protein [Source:UniProtKB/TrEMBL;Acc:D2CFL8]
Up-regulated	5	Disturbed	TraesCS2D02G356700.1	1.64874	0.00888152	Dol-P-Glc:Glc(2)Man(9)GlcNAc(2)-PP-Dol alpha-1,2-glucosyltransferase [Source:UniProtKB/TrEMBL;Acc:W5BR61]
Up-regulated	5	Disturbed	TraesCS7D02G366800.1	1.64719	0.00456245	uncharacterized protein LOC109775473
Up-regulated	5	Disturbed	TraesCS4A02G317300.1	1.6458	0.0285753	uncharacterized protein LOC109779516
Up-regulated	5	Disturbed	TraesCS1D02G069300.2	1.6412	2.90075e-06	tetraspanin-6
Up-regulated	5	Disturbed	TraesCS6D02G076500.1	1.63973	0.0471071	Protein Rf1, mitochondrial
Up-regulated	5	Disturbed	TraesCS1D02G450900.2	1.63962	0.0270965	RBR-type E3 ubiquitin transferase [Source:UniProtKB/TrEMBL;Acc:A0A341PR84]
Up-regulated	5	Disturbed	TraesCS5B02G375500.1	1.63379	0.00016832	nuclear transcription factor Y subunit A-10-like
Up-regulated	5	Disturbed	TraesCS6B02G278100.1	1.63259	0.00212439	Glutathione peroxidase [Source:UniProtKB/TrEMBL;Acc:A0A341WZ35]
Up-regulated	5	Disturbed	TraesCS2A02G083600.1	1.6323	0.00295587	MLO-like protein [Source:UniProtKB/TrEMBL;Acc:W5B000]
Up-regulated	5	Disturbed	TraesCS2D02G182700.1	1.62881	0.0437921	probable 6-phosphogluconolactonase 2
Up-regulated	5	Disturbed	TraesCS3B02G449100.1	1.62872	0.000219898	probable proline transporter 2
Up-regulated	5	Disturbed	TraesCS1D02G422600.1	1.62381	0.0138806	oleosin 1-like
Up-regulated	5	Disturbed	TraesCS5A02G228600.1	1.62214	0.00962582	hypothetical protein TRIUR3_31710
Up-regulated	5	Disturbed	TraesCS2A02G440600.1	1.61743	0.0033741	putative lipid-transfer protein DIR1
Up-regulated	5	Disturbed	TraesCS5B02G293700.1	1.61722	0.00464334	hypothetical protein TRIUR3_00845
Up-regulated	5	Disturbed	TraesCS2A02G048000.1	1.6148	0.00130416	unnamed protein product
Up-regulated	5	Disturbed	TraesCS5A02G225100.1	1.6144	3.9418e-06	cinnamoyl-CoA reductase 1-like
Up-regulated	5	Disturbed	TraesCS6A02G264400.1	1.61257	5.03274e-05	hypothetical protein TRIUR3_30366
Up-regulated	5	Disturbed	TraesCS7B02G449500.1	1.60948	0.0145492	Protein kinase APK1B, chloroplastic
Up-regulated	5	Disturbed	TraesCS2A02G209700.1	1.60867	0.00132925	uncharacterized protein LOC109787453
Up-regulated	5	Disturbed	TraesCSU02G192400.1	1.60643	0.0458261	uncharacterized protein LOC109741038
Up-regulated	5	Disturbed	TraesCS3A02G528800.1	1.60503	0.0010248	vacuolar-processing enzyme gamma-isozyme-like
Up-regulated	5	Disturbed	TraesCS5A02G171600.1	1.6021	0.0227249	uncharacterized protein LOC109767473
Up-regulated	5	Disturbed	TraesCS7B02G271800.1	1.60146	0.0269302	uncharacterized protein LOC109775473
Up-regulated	5	Disturbed	TraesCS4B02G143700.1	1.60115	8.97017e-06	myb-related protein MYBAS1-like
Up-regulated	5	Disturbed	TraesCS4D02G310100.1	1.59851	0.000915682	putative transporter arsB
Up-regulated	5	Disturbed	TraesCS5A02G423300.1	1.59797	0.00656901	zinc finger CCCH domain-containing protein 16
Up-regulated	5	Disturbed	TraesCS2D02G393700.1	1.59795	0.000406094	ferric reduction oxidase 2-like
Up-regulated	5	Disturbed	TraesCS7B02G232700.1	1.59607	4.22053e-05	spermidine synthase
Up-regulated	5	Disturbed	TraesCS6A02G187600.1	1.59264	0.0010248	uncharacterized protein LOC109761622
Up-regulated	5	Disturbed	TraesCS4B02G078400.1	1.59124	0.0359277	zinc finger protein 7-like
Up-regulated	5	Disturbed	TraesCS2B02G094100.5	1.59088	7.13833e-06	U-box domain-containing protein 33-like
Up-regulated	5	Disturbed	TraesCS4D02G112800.1	1.59079	0.0233882	two-component response regulator-like APRR3
Up-regulated	5	Disturbed	TraesCS7A02G368800.1	1.59009	0.00167923	hypothetical protein TRIUR3_11117
Up-regulated	5	Disturbed	TraesCS7A02G039100.1	1.58909	0.00482331	Disease resistance protein RPM1
Up-regulated	5	Disturbed	TraesCS5A02G226800.1	1.58755	0.0155567	Sugar transport protein 7
Up-regulated	5	Disturbed	TraesCS4A02G375800.1	1.58739	0.0226622	uncharacterized protein LOC100833654
Up-regulated	5	Disturbed	TraesCS7D02G387800.1	1.58664	0.0127495	protein GLUTAMINE DUMPER 6-like
Up-regulated	5	Disturbed	TraesCS5D02G239000.1	1.58651	0.0227249	uncharacterized protein LOC109770493
Up-regulated	5	Disturbed	TraesCS7B02G080800.1	1.58562	0.000887284	Blue copper protein
Up-regulated	5	Disturbed	TraesCS1B02G211700.1	1.58318	0.000557477	cytochrome P450 85A1-like
Up-regulated	5	Disturbed	TraesCS4A02G173300.2	1.58261	1.82101e-06	Myb-related protein MYBAS1
Up-regulated	5	Disturbed	TraesCS7A02G504000.1	1.58252	8.97106e-05	hydrophobic protein RCI2A-like
Up-regulated	5	Disturbed	TraesCS3B02G152300.1	1.5803	1.57591e-05	Glutathione S-transferase 1
Up-regulated	5	Disturbed	TraesCS4D02G236500.3	1.57287	1.06916e-05	Inositol-tetrakisphosphate 1-kinase [Source:UniProtKB/TrEMBL;Acc:A0A341UHA5]
Up-regulated	5	Disturbed	TraesCS4A02G326300.1	1.57262	0.00104215	predicted protein
Up-regulated	5	Disturbed	TraesCS5D02G365100.1	1.57067	0.00892463	phytoene synthase 2, chloroplastic-like
Up-regulated	5	Disturbed	TraesCS7D02G134300.4	1.56509	0.0312595	probable LRR receptor-like serine/threonine-protein kinase At5g10290
Up-regulated	5	Disturbed	TraesCS3B02G347000.1	1.56503	0.000223788	Inositol hexakisphosphate and diphosphoinositol-pentakisphosphate kinase [Source:UniProtKB/TrEMBL;Acc:A0A1D5W3L7]
Up-regulated	5	Disturbed	TraesCS4A02G093500.1	1.56392	0.0491204	protein DA1-related 2
Up-regulated	5	Disturbed	TraesCS4D02G088200.2	1.5598	0.0106131	Sucrose-phosphate synthase [Source:UniProtKB/TrEMBL;Acc:Q6EZE8]
Up-regulated	5	Disturbed	TraesCS7A02G231200.1	1.55806	1.81554e-08	phosphate transporter PHO1-3
Up-regulated	5	Disturbed	TraesCS5D02G470400.2	1.55796	4.26069e-06	Cellulose synthase [Source:UniProtKB/TrEMBL;Acc:A0A341WI42]
Up-regulated	5	Disturbed	TraesCS7A02G376800.1	1.55773	0.000274847	Thiamine thiazole synthase, chloroplastic [Source:UniProtKB/TrEMBL;Acc:A0A341Y122]
Up-regulated	5	Disturbed	TraesCS6B02G154900.1	1.55715	0.0108461	uncharacterized protein LOC109783826
Up-regulated	5	Disturbed	TraesCS4B02G113200.1	1.55708	0.0289539	disease resistance protein RGA2-like
Up-regulated	5	Disturbed	TraesCS5B02G539800.1	1.55521	0.00021058	putative disease resistance protein RGA1
Up-regulated	5	Disturbed	TraesCS4D02G036500.4	1.55438	0.00456245	Phosphatidylinositol 4-phosphate 5-kinase [Source:UniProtKB/TrEMBL;Acc:A0A341UDC0]
Up-regulated	5	Disturbed	TraesCS7D02G231300.1	1.5523	1.43733e-06	phosphate transporter PHO1-3
Up-regulated	5	Disturbed	TraesCS5A02G518300.1	1.55093	0.0341923	putative aquaporin TIP4-1
Up-regulated	5	Disturbed	TraesCS4A02G107200.2	1.55082	0.0297372	phosphatidylinositol transfer protein 2-like
Up-regulated	5	Disturbed	TraesCS6B02G141200.1	1.55032	0.0253251	AIG2-like protein D
Up-regulated	5	Disturbed	TraesCS6A02G328700.1	1.54881	0.0160576	auxin-responsive protein SAUR32-like
Up-regulated	5	Disturbed	TraesCS1B02G269500.1	1.54804	0.0395651	isopentenyl-diphosphate Delta-isomerase I-like
Up-regulated	5	Disturbed	TraesCS4A02G140000.1	1.54259	0.0467985	Sucrose synthase [Source:UniProtKB/TrEMBL;Acc:A0A1D6DDQ0]
Up-regulated	5	Disturbed	TraesCS5D02G376600.2	1.53984	0.0044327	uncharacterized protein LOC109777104
Up-regulated	5	Disturbed	TraesCS2D02G047200.1	1.53861	0.0344072	unnamed protein product
Up-regulated	5	Disturbed	TraesCS4D02G142300.1	1.53595	1.7675e-06	myb-related protein MYBAS1-like
Up-regulated	5	Disturbed	TraesCS4A02G321500.1	1.53478	1.29647e-06	fructan exohydrolase
Up-regulated	5	Disturbed	TraesCS4D02G306000.1	1.53376	0.00672207	PHD finger protein ING [Source:UniProtKB/TrEMBL;Acc:A0A341UMH4]
Up-regulated	5	Disturbed	TraesCS1A02G265800.1	1.53156	0.0442202	putative proteinase inhibitor-related protein
Up-regulated	5	Disturbed	TraesCS2D02G047100.1	1.52673	0.0388978	hypothetical protein TRIUR3_10753
Up-regulated	5	Disturbed	TraesCS5A02G191000.1	1.52215	8.43497e-05	uncharacterized protein LOC109754359
Up-regulated	5	Disturbed	TraesCS4D02G276500.1	1.52192	0.00293813	heat shock factor HsfA2d
Up-regulated	5	Disturbed	TraesCS6B02G130800.1	1.51724	0.000466992	protein NLP3-like
Up-regulated	5	Disturbed	TraesCS1A02G066900.1	1.51298	0.000178058	uncharacterized protein ycf45
Up-regulated	5	Disturbed	TraesCS7A02G554800.1	1.51174	0.0198862	SPX domain-containing protein 3-like
Up-regulated	5	Disturbed	TraesCS3B02G149600.2	1.50869	0.0350538	NADPH:adrenodoxin oxidoreductase, mitochondrial [Source:UniProtKB/TrEMBL;Acc:A0A341SKP9]
Up-regulated	5	Disturbed	TraesCS1A02G163700.2	1.50716	0.000699566	uncharacterized protein LOC109740951
Up-regulated	5	Disturbed	TraesCS2A02G522100.1	1.50375	9.61862e-06	hypothetical protein TRIUR3_32658
Up-regulated	5	Disturbed	TraesCS2B02G061200.1	1.50283	0.0155815	unnamed protein product
Up-regulated	5	Disturbed	TraesCS6A02G170000.1	1.49963	0.000239357	hypothetical protein TRIUR3_22544
Up-regulated	5	Disturbed	TraesCS3A02G386100.3	1.49607	0.00400925	Beta-galactosidase [Source:UniProtKB/TrEMBL;Acc:A0A1D5V971]
Up-regulated	5	Disturbed	TraesCS4B02G253400.1	1.49508	0.00105501	uncharacterized protein LOC109755456
Up-regulated	5	Disturbed	TraesCS4A02G298000.1	1.48852	0.028613	TATA-box-binding protein 2
Up-regulated	5	Disturbed	TraesCS4A02G096400.1	1.48815	0.0106638	Laccase [Source:UniProtKB/TrEMBL;Acc:A0A1D5XBX9]
Up-regulated	5	Disturbed	TraesCS2B02G508400.1	1.48753	0.0234846	anthocyanidin reductase ((2S)-flavan-3-ol-forming)-like
Up-regulated	5	Disturbed	TraesCS2A02G435500.1	1.48661	0.0416555	unnamed protein product
Up-regulated	5	Disturbed	TraesCS3A02G230300.1	1.48559	0.000388658	CASP-like protein [Source:UniProtKB/TrEMBL;Acc:A0A1D5VA81]
Up-regulated	5	Disturbed	TraesCS5D02G551900.1	1.48536	7.13015e-05	beta-fructofuranosidase, insoluble isoenzyme 4-like
Up-regulated	5	Disturbed	TraesCS5A02G373500.1	1.48527	5.4186e-05	nuclear transcription factor Y subunit A-10-like
Up-regulated	5	Disturbed	TraesCS6B02G005000.1	1.48502	0.0221972	Uncharacterized protein
Up-regulated	5	Disturbed	TraesCS4D02G273600.1	1.48465	0.0388978	probable serine/threonine-protein kinase PBL16
Up-regulated	5	Disturbed	TraesCS5B02G089200.1	1.48437	0.000171406	myb-related protein MYBAS2-like
Up-regulated	5	Disturbed	TraesCS4D02G165000.1	1.48326	0.00239997	unnamed protein product
Up-regulated	5	Disturbed	TraesCS5D02G301900.1	1.48098	0.0182005	uncharacterized protein LOC109752143
Up-regulated	5	Disturbed	TraesCS4B02G145600.2	1.4807	0.00871467	U2 snRNP auxiliary factor large subunit [Source:UniProtKB/TrEMBL;Acc:A0A341U5B5]
Up-regulated	5	Disturbed	TraesCS5D02G237600.2	1.47718	1.12736e-05	uncharacterized protein LOC109773854
Up-regulated	5	Disturbed	TraesCS7A02G476500.2	1.47039	0.000176449	ROR1 [Source:UniProtKB/TrEMBL;Acc:A0A1D6BRF4]
Up-regulated	5	Disturbed	TraesCS3D02G408800.1	1.47003	0.0384705	probable proline transporter 2
Up-regulated	5	Disturbed	TraesCS2B02G596600.1	1.46834	0.0493106	unnamed protein product
Up-regulated	5	Disturbed	TraesCS1B02G213600.2	1.46763	0.00132513	probable methyltransferase PMT21
Up-regulated	5	Disturbed	TraesCS7B02G129700.1	1.46453	8.39553e-05	phosphate transporter PHO1-3
Up-regulated	5	Disturbed	TraesCS6B02G150700.1	1.46144	0.026931	uncharacterized protein LOC109758739
Up-regulated	5	Disturbed	TraesCS5B02G351200.1	1.45937	3.4608e-07	uncharacterized protein LOC109782065
Up-regulated	5	Disturbed	TraesCS5D02G466600.1	1.45821	0.0350538	protochlorophyllide-dependent translocon component 52, chloroplastic-like
Up-regulated	5	Disturbed	TraesCS6D02G004500.1	1.45754	0.00194799	Uncharacterized protein
Up-regulated	5	Disturbed	TraesCS1D02G155400.1	1.45551	0.00915517	uncharacterized protein LOC109787057
Up-regulated	5	Disturbed	TraesCS4B02G090800.1	1.45365	0.0135912	protein NRT1/ PTR FAMILY 4.3-like
Up-regulated	5	Disturbed	TraesCSU02G110500.1	1.45293	1.97109e-06	GDSL esterase/lipase At1g09390-like
Up-regulated	5	Disturbed	TraesCS7D02G460700.1	1.45285	0.00136075	Phosphoglycerate kinase [Source:UniProtKB/TrEMBL;Acc:A0A1D6CST5]
Up-regulated	5	Disturbed	TraesCS6A02G379700.1	1.45232	0.000234219	phosphate transporter PHO1-2-like
Up-regulated	5	Disturbed	TraesCS2D02G183900.1	1.4507	0.010872	LRR receptor-like serine/threonine-protein kinase RPK2
Up-regulated	5	Disturbed	TraesCS5B02G028500.2	1.45037	0.00321905	CCAAT-binding transcription factor B
Up-regulated	5	Disturbed	TraesCS3A02G066600.1	1.44986	0.00871467	hypothetical protein TRIUR3_01698
Up-regulated	5	Disturbed	TraesCS5B02G320500.1	1.44772	0.0475579	two-component response regulator-like PRR95
Up-regulated	5	Disturbed	TraesCS1D02G277600.1	1.44496	0.0182682	auxin transporter-like protein 2
Up-regulated	5	Disturbed	TraesCS7B02G490900.2	1.44479	0.00627244	putative disease resistance RPP13-like protein 2
Up-regulated	5	Disturbed	TraesCS5B02G539200.1	1.44428	0.0117939	uncharacterized protein At5g65660-like
Up-regulated	5	Disturbed	TraesCS3B02G123700.1	1.44323	0.00262778	monothiol glutaredoxin-S2-like
Up-regulated	5	Disturbed	TraesCS6A02G043200.1	1.44267	0.0152592	uncharacterized protein LOC109736158
Up-regulated	5	Disturbed	TraesCS3A02G148700.1	1.44059	0.00930842	hypothetical protein TRIUR3_34658
Up-regulated	5	Disturbed	TraesCS7D02G451900.1	1.44047	0.000786441	metal transporter Nramp3
Up-regulated	5	Disturbed	TraesCS4D02G087900.1	1.44036	0.00585372	protein NRT1/ PTR FAMILY 4.3-like
Up-regulated	5	Disturbed	TraesCS7D02G541100.2	1.43949	0.0108461	SPX domain-containing protein 3-like
Up-regulated	5	Disturbed	TraesCS5B02G227400.1	1.43769	0.00443912	uncharacterized protein LOC109770493
Up-regulated	5	Disturbed	TraesCS2D02G264300.1	1.43579	0.010008	uncharacterized protein LOC109740225
Up-regulated	5	Disturbed	TraesCS5D02G095600.2	1.43508	0.00196198	myb-related protein MYBAS2-like
Up-regulated	5	Disturbed	TraesCS2B02G198700.1	1.4346	0.0174228	nuclear transcription factor Y subunit A-7-like
Up-regulated	5	Disturbed	TraesCS5D02G438700.1	1.42679	0.00856623	uncharacterized protein LOC109787329
Up-regulated	5	Disturbed	TraesCS3D02G312200.1	1.42677	0.00859753	Inositol hexakisphosphate and diphosphoinositol-pentakisphosphate kinase [Source:UniProtKB/TrEMBL;Acc:A0A341T6H0]
Up-regulated	5	Disturbed	TraesCS4A02G211800.2	1.42597	0.0129812	transcriptional corepressor SEUSS-like
Up-regulated	5	Disturbed	TraesCS4D02G173400.1	1.42548	7.03976e-07	probable inactive receptor kinase At5g58300
Up-regulated	5	Disturbed	TraesCS4B02G006200.1	1.42442	0.032714	uncharacterized protein LOC109761799
Up-regulated	5	Disturbed	TraesCS2D02G274800.2	1.42158	0.00136061	probable UDP-N-acetylglucosamine--peptide N-acetylglucosaminyltransferase SEC
Up-regulated	5	Disturbed	TraesCS7A02G183500.1	1.42065	0.00635766	Defensin Tk-AMP-D4
Up-regulated	5	Disturbed	TraesCS5B02G137400.2	1.42026	0.0403836	Protein ZINC INDUCED FACILITATOR-LIKE 1
Up-regulated	5	Disturbed	TraesCS3A02G246000.1	1.41765	0.00394412	Auxin response factor [Source:UniProtKB/TrEMBL;Acc:A0A1D5VCE0]
Up-regulated	5	Disturbed	TraesCS4A02G476200.1	1.41551	0.00546491	putative disease resistance RPP13-like protein 1
Up-regulated	5	Disturbed	TraesCS2B02G300600.1	1.41428	0.0235928	uncharacterized protein LOC109732778
Up-regulated	5	Disturbed	TraesCS3A02G110900.1	1.41366	0.000587116	hypothetical protein TRIUR3_33902
Up-regulated	5	Disturbed	TraesCS1A02G363800.2	1.41317	0.000250018	uncharacterized protein LOC109733809
Up-regulated	5	Disturbed	TraesCS4A02G042100.1	1.41237	0.0135238	putative polyol transporter 1
Up-regulated	5	Disturbed	TraesCS2A02G404900.2	1.41068	0.0365166	protein LAZ1-like
Up-regulated	5	Disturbed	TraesCS2B02G284200.2	1.41055	0.0196874	probable xyloglucan endotransglucosylase/hydrolase protein 23
Up-regulated	5	Disturbed	TraesCS3A02G489100.1	1.40821	0.000274847	cysteine-rich and transmembrane domain-containing protein A-like
Up-regulated	5	Disturbed	TraesCS5D02G421400.1	1.40705	0.00463232	uncharacterized protein LOC109763220
Up-regulated	5	Disturbed	TraesCS5A02G469100.1	1.40691	0.0076518	hypothetical protein BRADI_1g04090v3
Up-regulated	5	Disturbed	TraesCS6D02G235700.1	1.40636	0.000830734	transcription factor bHLH123-like
Up-regulated	5	Disturbed	TraesCS7D02G020800.2	1.40592	0.000259881	disease resistance protein RPP13-like
Up-regulated	5	Disturbed	TraesCS3A02G319100.1	1.40518	0.000817604	Inositol hexakisphosphate and diphosphoinositol-pentakisphosphate kinase [Source:UniProtKB/TrEMBL;Acc:A0A341S894]
Up-regulated	5	Disturbed	TraesCS3B02G573400.1	1.40508	0.0107651	Putative disease resistance RPP13-like protein 3
Up-regulated	5	Disturbed	TraesCS1B02G180400.1	1.40047	0.0103649	uncharacterized protein LOC109740951
Up-regulated	5	Disturbed	TraesCS5D02G095600.1	1.39471	0.0305088	myb-related protein MYBAS2-like
Up-regulated	5	Disturbed	TraesCS6D02G255600.1	1.39463	0.0045723	hypothetical protein TRIUR3_03215
Up-regulated	5	Disturbed	TraesCS5B02G036000.1	1.39451	0.0401497	unnamed protein product
Up-regulated	5	Disturbed	TraesCS7D02G160900.1	1.39135	0.0119467	uncharacterized protein LOC109752758
Up-regulated	5	Disturbed	TraesCS3B02G120200.1	1.39077	0.0307304	Transcription factor bHLH51
Up-regulated	5	Disturbed	TraesCS3A02G127100.1	1.3904	0.0285102	predicted protein
Up-regulated	5	Disturbed	TraesCS3D02G243500.1	1.38808	0.000149478	uncharacterized protein LOC109759318
Up-regulated	5	Disturbed	TraesCS1B02G212200.1	1.38752	0.000746293	uncharacterized protein LOC109744571
Up-regulated	5	Disturbed	TraesCS2B02G062700.1	1.38662	0.0154322	unnamed protein product
Up-regulated	5	Disturbed	TraesCS6A02G307100.1	1.38341	0.00620134	Hexosyltransferase [Source:UniProtKB/TrEMBL;Acc:A0A1D6A5P7]
Up-regulated	5	Disturbed	TraesCS7D02G541100.1	1.38212	0.00041726	SPX domain-containing protein 3-like
Up-regulated	5	Disturbed	TraesCS5D02G340300.1	1.37833	0.00108533	aspartyl protease family protein 1-like
Up-regulated	5	Disturbed	TraesCS5A02G538700.1	1.37779	0.0167613	metalloendoproteinase 4-MMP-like
Up-regulated	5	Disturbed	TraesCS5A02G506500.1	1.37649	0.00829496	Cyclin-dependent kinase inhibitor [Source:UniProtKB/TrEMBL;Acc:A0A1D5YQT8]
Up-regulated	5	Disturbed	TraesCS5B02G131700.1	1.37438	0.00597104	R3H domain-containing protein 4
Up-regulated	5	Disturbed	TraesCS7A02G227800.1	1.37403	0.0341609	unnamed protein product
Up-regulated	5	Disturbed	TraesCS3A02G533600.2	1.37138	0.019996	Pectin acetylesterase [Source:UniProtKB/TrEMBL;Acc:A0A1D5V9K3]
Up-regulated	5	Disturbed	TraesCS7B02G339300.1	1.3684	0.000344688	RNA polymerase I-specific transcription initiation factor RRN3-like
Up-regulated	5	Disturbed	TraesCS2B02G086200.1	1.3683	5.32029e-05	predicted protein
Up-regulated	5	Disturbed	TraesCS5D02G434000.1	1.36655	0.0395592	predicted protein
Up-regulated	5	Disturbed	TraesCS1D02G126500.1	1.36606	0.0144284	S-type anion channel SLAH2-like
Up-regulated	5	Disturbed	TraesCS5B02G090200.1	1.36521	0.00915517	ribonucleoside-diphosphate reductase large subunit
Up-regulated	5	Disturbed	TraesCS7A02G428400.1	1.36513	0.0495136	Peroxidase [Source:UniProtKB/TrEMBL;Acc:A0A1D6BPT6]
Up-regulated	5	Disturbed	TraesCS1A02G198600.1	1.36325	0.00264256	probable methyltransferase PMT21
Up-regulated	5	Disturbed	TraesCS4B02G312200.1	1.36243	1.67941e-08	N/A
Up-regulated	5	Disturbed	TraesCS1A02G168600.1	1.36123	0.0222478	calcium uniporter protein 2, mitochondrial-like
Up-regulated	5	Disturbed	TraesCS3B02G353000.1	1.36101	0.000183026	quinone reductase 2
Up-regulated	5	Disturbed	TraesCS4D02G074500.1	1.36027	0.00167433	4-coumarate--CoA ligase-like 7
Up-regulated	5	Disturbed	TraesCS3A02G060500.1	1.35969	0.045824	BTB/POZ and MATH domain-containing protein 2-like
Up-regulated	5	Disturbed	TraesCS1B02G203600.2	1.35903	0.00620335	U1 small nuclear ribonucleoprotein 70 kDa-like
Up-regulated	5	Disturbed	TraesCS6A02G323800.1	1.34979	0.0438169	universal stress protein PHOS32
Up-regulated	5	Disturbed	TraesCS1A02G012600.1	1.34636	0.00453115	polygalacturonase inhibitor-like
Up-regulated	5	Disturbed	TraesCS1A02G238600.1	1.34326	0.00369539	subtilisin-like protease SBT1.2
Up-regulated	5	Disturbed	TraesCS6A02G320700.1	1.34252	0.00239997	Protein SRG1
Up-regulated	5	Disturbed	TraesCS3A02G109300.1	1.34237	7.40053e-05	transcription factor MYB1R1-like
Up-regulated	5	Disturbed	TraesCS5B02G532000.2	1.34185	0.0107074	putative RNA-binding protein Luc7-like 2
Up-regulated	5	Disturbed	TraesCS3A02G178200.1	1.34052	0.00615915	unnamed protein product
Up-regulated	5	Disturbed	TraesCS6A02G379300.1	1.33976	4.3384e-05	hypothetical protein TRIUR3_26900
Up-regulated	5	Disturbed	TraesCS4D02G350700.3	1.33848	0.00118822	uncharacterized protein LOC109748233
Up-regulated	5	Disturbed	TraesCS6A02G107700.3	1.33801	0.00279261	probable UDP-N-acetylglucosamine--peptide N-acetylglucosaminyltransferase SPINDLY [
Up-regulated	5	Disturbed	TraesCS4D02G214100.1	1.33718	0.0177896	Uncharacterized RNA-binding protein C25G10.01
Up-regulated	5	Disturbed	TraesCS1A02G393900.1	1.33627	0.000266558	hypothetical protein TRIUR3_10766
Up-regulated	5	Disturbed	TraesCS4A02G208400.1	1.33509	0.0137421	abcissic acid stress ripening
Up-regulated	5	Disturbed	TraesCS5D02G103600.2	1.33375	0.000260374	N/A
Up-regulated	5	Disturbed	TraesCS5D02G302700.1	1.33315	0.0400261	beta-glucosidase 31-like
Up-regulated	5	Disturbed	TraesCS1B02G451800.1	1.33205	0.00760569	PLASMODESMATA CALLOSE-BINDING PROTEIN 2-like
Up-regulated	5	Disturbed	TraesCS2B02G052400.1	1.33038	0.0433649	disease resistance protein Pik-2
Up-regulated	5	Disturbed	TraesCS5D02G482100.1	1.32756	0.00836443	WAT1-related protein [Source:UniProtKB/TrEMBL;Acc:A0A341W9S7]
Up-regulated	5	Disturbed	TraesCS2B02G545100.1	1.32619	1.4465e-06	uncharacterized vacuolar membrane protein YML018C
Up-regulated	5	Disturbed	TraesCS6D02G236700.1	1.32504	0.00215812	dof zinc finger protein DOF4.6-like
Up-regulated	5	Disturbed	TraesCS7A02G148700.1	1.32448	0.0315375	thioredoxin H2-like
Up-regulated	5	Disturbed	TraesCS2D02G259400.2	1.32409	0.000952582	protein NRT1/ PTR FAMILY 4.5-like
Up-regulated	5	Disturbed	TraesCS6B02G127600.1	1.32293	0.0480815	CASP-like protein [Source:UniProtKB/TrEMBL;Acc:A0A1D6B1Q9]
Up-regulated	5	Disturbed	TraesCS3D02G437200.1	1.32214	0.00566165	Dirigent protein [Source:UniProtKB/TrEMBL;Acc:A0A1D5WHT2]
Up-regulated	5	Disturbed	TraesCS7A02G552000.1	1.32117	0.0403548	Flavin-containing monooxygenase [Source:UniProtKB/TrEMBL;Acc:A0A1D6BI02]
Up-regulated	5	Disturbed	TraesCS5A02G404600.1	1.32094	0.00928727	BTB/POZ domain-containing protein At3g50780
Up-regulated	5	Disturbed	TraesCS3D02G107400.1	1.31996	0.000256845	monothiol glutaredoxin-S2-like
Up-regulated	5	Disturbed	TraesCS6B02G368100.1	1.31987	0.00836443	uncharacterized protein LOC109751366
Up-regulated	5	Disturbed	TraesCS4D02G216700.1	1.31949	0.0117939	uncharacterized protein LOC109775146
Up-regulated	5	Disturbed	TraesCS4B02G113500.1	1.31923	0.00725468	proline-rich protein HaeIII subfamily 1-like
Up-regulated	5	Disturbed	TraesCS5D02G168900.1	1.31786	0.00620134	inactive LRR receptor-like serine/threonine-protein kinase BIR2
Up-regulated	5	Disturbed	TraesCS2A02G042700.1	1.31324	0.0167321	myb-related protein MYBAS2-like
Up-regulated	5	Disturbed	TraesCS4A02G274200.1	1.30996	0.00871467	Phosphatidylinositol 4-phosphate 5-kinase [Source:UniProtKB/TrEMBL;Acc:W5DMI7]
Up-regulated	5	Disturbed	TraesCS7B02G103800.2	1.30972	0.0213774	pyruvate dehydrogenase E1 component subunit alpha-2, mitochondrial
Up-regulated	5	Disturbed	TraesCS3D02G164800.2	1.3097	0.00664669	putative ubiquitin-conjugating enzyme E2 38
Up-regulated	5	Disturbed	TraesCS5B02G255800.1	1.30935	0.00588634	uncharacterized protein LOC109757586
Up-regulated	5	Disturbed	TraesCS6B02G059200.1	1.30868	0.0112462	uncharacterized protein LOC109736158
Up-regulated	5	Disturbed	TraesCS4D02G080700.2	1.3075	0.00252726	ATP-dependent (S)-NAD(P)H-hydrate dehydratase [Source:UniProtKB/TrEMBL;Acc:W5ETE1]
Up-regulated	5	Disturbed	TraesCS3B02G213400.1	1.30697	0.0294136	Uncharacterized RNA-binding protein C25G10.01
Up-regulated	5	Disturbed	TraesCS6B02G110200.1	1.30616	0.00359987	18.9 kDa heat shock protein-like
Up-regulated	5	Disturbed	TraesCS4D02G361300.1	1.30534	0.00664189	HKT8 [Source:UniProtKB/TrEMBL;Acc:A4ZGN6]
Up-regulated	5	Disturbed	TraesCS5D02G025200.1	1.30509	0.0192702	PI-PLC X domain-containing protein At5g67130-like
Up-regulated	5	Disturbed	TraesCS5D02G394900.1	1.30475	0.00769933	serine/threonine protein phosphatase 2A 57 kDa regulatory subunit B' theta isoform-like
Up-regulated	5	Disturbed	TraesCS2B02G270100.1	1.30234	0.0189655	probable inactive leucine-rich repeat receptor-like protein kinase At3g03770
Up-regulated	5	Disturbed	TraesCS4B02G326900.1	1.30069	0.00209537	expansin-like A1
Up-regulated	5	Disturbed	TraesCS2B02G383100.5	1.30056	0.0223204	uncharacterized protein LOC109749374
Up-regulated	5	Disturbed	TraesCS7A02G472100.1	1.29975	0.0116237	Disease resistance protein RPP13
Up-regulated	5	Disturbed	TraesCS2B02G509700.1	1.29782	0.0177612	organic cation/carnitine transporter 4-like
Up-regulated	5	Disturbed	TraesCS7D02G378500.1	1.29758	0.0188725	probable calcium-binding protein CML21
Up-regulated	5	Disturbed	TraesCS4A02G199000.1	1.29758	0.00871467	protein SMAX1-LIKE 3-like
Up-regulated	5	Disturbed	TraesCS6D02G091000.1	1.29752	0.0316481	protein NLP3-like
Up-regulated	5	Disturbed	TraesCS4B02G179000.2	1.29682	0.035676	autophagy-related protein 18a
Up-regulated	5	Disturbed	TraesCS5B02G424500.1	1.29648	0.0250892	WPP domain-associated protein-like
Up-regulated	5	Disturbed	TraesCS4B02G245400.2	1.29545	0.0020041	microtubule-associated protein 70-4-like
Up-regulated	5	Disturbed	TraesCS5A02G019700.1	1.2953	0.00272017	PI-PLC X domain-containing protein At5g67130-like
Up-regulated	5	Disturbed	TraesCS4A02G308700.1	1.29436	0.00175903	1-aminocyclopropane-1-carboxylate oxidase homolog 1-like
Up-regulated	5	Disturbed	TraesCS7A02G404300.1	1.29374	5.03341e-07	Stress response protein [Source:UniProtKB/TrEMBL;Acc:H6WRE2]
Up-regulated	5	Disturbed	TraesCS1B02G167800.1	1.29365	0.0231326	acyltransferase-like protein At1g54570, chloroplastic
Up-regulated	5	Disturbed	TraesCS3D02G058900.1	1.291	0.0190965	lipid phosphate phosphatase 2-like
Up-regulated	5	Disturbed	TraesCS4A02G230700.1	1.28946	0.00579219	Protein NLP2
Up-regulated	5	Disturbed	TraesCS2A02G131500.1	1.2868	0.016035	uncharacterized protein LOC109742578
Up-regulated	5	Disturbed	TraesCS1D02G086300.1	1.28566	0.0407775	uncharacterized protein LOC109733060
Up-regulated	5	Disturbed	TraesCS7D02G430000.2	1.28411	0.000441075	RNA polymerase I-specific transcription initiation factor RRN3-like
Up-regulated	5	Disturbed	TraesCS5A02G029900.1	1.2826	0.000895859	nuclear transcription factor Y subunit A-2-like
Up-regulated	5	Disturbed	TraesCS6A02G222000.1	1.28195	0.00439759	Phytosulfokine receptor 1
Up-regulated	5	Disturbed	TraesCS6D02G219700.1	1.28142	0.0211071	2-methyl-6-phytyl-1,4-hydroquinone methyltransferase 1, chloroplastic
Up-regulated	5	Disturbed	TraesCS3B02G120000.1	1.27763	0.029558	pyruvate decarboxylase 1-like
Up-regulated	5	Disturbed	TraesCS1B02G144500.1	1.27699	0.0311957	zinc transporter 7-like
Up-regulated	5	Disturbed	TraesCS2A02G168200.1	1.27604	0.00268961	Sucrose synthase [Source:UniProtKB/TrEMBL;Acc:A0A341Q089]
Up-regulated	5	Disturbed	TraesCS6D02G395900.1	1.27518	0.000153494	wall-associated receptor kinase 1-like
Up-regulated	5	Disturbed	TraesCS4D02G118500.2	1.2731	0.018304	Non-specific serine/threonine protein kinase [Source:UniProtKB/TrEMBL;Acc:W5ETB2]
Up-regulated	5	Disturbed	TraesCS5B02G228800.1	1.2724	0.00489768	predicted protein
Up-regulated	5	Disturbed	TraesCS5B02G231400.1	1.27177	0.00364867	E3 ubiquitin-protein ligase RING1-like protein
Up-regulated	5	Disturbed	TraesCS7A02G061000.1	1.27074	0.00627484	short-chain dehydrogenase TIC 32, chloroplastic-like
Up-regulated	5	Disturbed	TraesCS3D02G317400.1	1.26758	0.00664669	NAD(P)H dehydrogenase (quinone) FQR1-like
Up-regulated	5	Disturbed	TraesCS3D02G474500.1	1.26721	8.10653e-05	N/A
Up-regulated	5	Disturbed	TraesCS2D02G179600.1	1.26671	6.03887e-05	nuclear transcription factor Y subunit A-7-like
Up-regulated	5	Disturbed	TraesCS2D02G425700.1	1.26605	0.0218339	ethylene-responsive transcription factor 4-like
Up-regulated	5	Disturbed	TraesCS4D02G332500.1	1.26493	0.0257325	Cyclin-dependent kinase inhibitor [Source:UniProtKB/TrEMBL;Acc:A0A341UNC8]
Up-regulated	5	Disturbed	TraesCS5B02G285000.1	1.26463	0.026858	probable auxin efflux carrier component 5b
Up-regulated	5	Disturbed	TraesCS7A02G376200.1	1.26445	2.63626e-06	SPX domain-containing protein 1-like
Up-regulated	5	Disturbed	TraesCS1A02G350200.3	1.2633	0.0353544	Tubulin alpha chain [Source:UniProtKB/TrEMBL;Acc:A4K4Y1]
Up-regulated	5	Disturbed	TraesCS6D02G178600.1	1.26185	0.00289599	uncharacterized protein LOC109761622
Up-regulated	5	Disturbed	TraesCS3A02G189600.1	1.26131	0.0498789	Dof zinc finger protein DOF3.3
Up-regulated	5	Disturbed	TraesCS2A02G048300.1	1.25976	0.0095759	unnamed protein product
Up-regulated	5	Disturbed	TraesCS1A02G379900.1	1.2591	0.0164116	uncharacterized protein LOC109777220
Up-regulated	5	Disturbed	TraesCS5A02G235600.1	1.25897	0.0133728	Annexin A13
Up-regulated	5	Disturbed	TraesCS5D02G449200.1	1.25787	0.000256845	transcription factor UNE12-like
Up-regulated	5	Disturbed	TraesCS6B02G267800.1	1.25598	0.000161957	SPX domain-containing membrane protein Os02g45520
Up-regulated	5	Disturbed	TraesCS5D02G119400.1	1.25477	0.00836443	SAGA-associated factor 29-like
Up-regulated	5	Disturbed	TraesCS4D02G330300.1	1.25255	0.0306081	aspartic proteinase nepenthesin-1-like
Up-regulated	5	Disturbed	TraesCS3A02G385500.9	1.25148	0.00499186	1-phosphatidylinositol-3-phosphate 5-kinase FAB1B-like
Up-regulated	5	Disturbed	TraesCS3D02G421300.1	1.25095	0.0390715	uncharacterized protein LOC109742795
Up-regulated	5	Disturbed	TraesCS1D02G259200.1	1.24785	0.0294601	F-box/FBD/LRR-repeat protein At1g13570-like
Up-regulated	5	Disturbed	TraesCS4B02G319900.1	1.24664	0.0195001	Non-specific serine/threonine protein kinase [Source:UniProtKB/TrEMBL;Acc:A0A1D5XN49]
Up-regulated	5	Disturbed	TraesCS6D02G364100.1	1.24649	0.00169881	phosphate transporter PHO1-2-like
Up-regulated	5	Disturbed	TraesCS6D02G253100.1	1.24605	0.011138	RING-type E3 ubiquitin transferase [Source:UniProtKB/TrEMBL;Acc:W5GWD6]
Up-regulated	5	Disturbed	TraesCS3A02G142100.2	1.24484	0.0493334	hypothetical protein TRIUR3_23325
Up-regulated	5	Disturbed	TraesCS6D02G083600.3	1.23931	0.028613	synaptotagmin-5-like
Up-regulated	5	Disturbed	TraesCS6A02G154700.1	1.23903	0.0129501	predicted protein
Up-regulated	5	Disturbed	TraesCS4B02G091700.1	1.2388	0.0192125	unnamed protein product
Up-regulated	5	Disturbed	TraesCS4A02G476300.1	1.2383	0.0415044	putative disease resistance RPP13-like protein 1
Up-regulated	5	Disturbed	TraesCS7A02G211100.1	1.23643	0.00292354	protein NSP-INTERACTING KINASE 1-like
Up-regulated	5	Disturbed	TraesCS7B02G042400.2	1.23624	0.0115603	codeine O-demethylase-like
Up-regulated	5	Disturbed	TraesCS1B02G478700.1	1.23204	0.0143378	uncharacterized protein LOC109754650
Up-regulated	5	Disturbed	TraesCS4D02G109500.1	1.23159	8.05366e-05	Abscisic stress-ripening protein [Source:UniProtKB/TrEMBL;Acc:J7EJB7]
Up-regulated	5	Disturbed	TraesCS4A02G212100.1	1.23073	0.00626339	Reticuline oxidase-like protein
Up-regulated	5	Disturbed	TraesCS2A02G202000.2	1.22923	0.0409143	Protein DETOXIFICATION [Source:UniProtKB/TrEMBL;Acc:W5B067]
Up-regulated	5	Disturbed	TraesCS6A02G106000.2	1.22769	0.00328285	thiosulfate sulfurtransferase 18-like
Up-regulated	5	Disturbed	TraesCS2D02G224400.1	1.22749	0.00108942	Translation initiation factor [Source:UniProtKB/TrEMBL;Acc:Q8LRM9]
Up-regulated	5	Disturbed	TraesCS5B02G334700.1	1.22744	0.00763803	aspartyl protease family protein 1-like
Up-regulated	5	Disturbed	TraesCS1B02G179200.3	1.22607	0.0285231	vacuolar protein sorting-associated protein 52 A-like
Up-regulated	5	Disturbed	TraesCS7D02G485300.1	1.22403	0.028613	protein GLUTAMINE DUMPER 1-like
Up-regulated	5	Disturbed	TraesCS4A02G212800.1	1.22019	0.000158557	probable monogalactosyldiacylglycerol synthase 2, chloroplastic
Up-regulated	5	Disturbed	TraesCS4A02G387600.1	1.21961	0.00967284	aspartic proteinase CDR1-like
Up-regulated	5	Disturbed	TraesCS6B02G217000.1	1.21611	0.0107074	uncharacterized protein LOC109761622
Up-regulated	5	Disturbed	TraesCS2B02G016300.1	1.21563	0.00280218	NDR1/HIN1-like protein 10
Up-regulated	5	Disturbed	TraesCS2B02G195900.1	1.21525	0.0326389	SPX domain-containing protein 6-like
Up-regulated	5	Disturbed	TraesCS1D02G387300.1	1.21223	0.00839329	uncharacterized protein LOC109777220
Up-regulated	5	Disturbed	TraesCS1D02G075700.1	1.21217	0.0268459	KN1-type homeobox transcription factor [Source:UniProtKB/TrEMBL;Acc:B6F212]
Up-regulated	5	Disturbed	TraesCS2A02G126100.1	1.21195	0.0448164	Cysteine proteinase inhibitor [Source:UniProtKB/TrEMBL;Acc:A0A341PXS4]
Up-regulated	5	Disturbed	TraesCS5B02G202300.1	1.21074	0.00526485	protein trichome birefringence-like 14
Up-regulated	5	Disturbed	TraesCS2A02G323000.1	1.20885	0.0234846	BTB/POZ and TAZ domain-containing protein 2-like
Up-regulated	5	Disturbed	TraesCS2B02G415600.1	1.2081	0.0275338	polyprenol reductase 1
Up-regulated	5	Disturbed	TraesCS5D02G388900.1	1.20717	0.0319687	polycomb group protein EMBRYONIC FLOWER 2-like
Up-regulated	5	Disturbed	TraesCS6B02G404700.1	1.20692	0.0121046	probable monogalactosyldiacylglycerol synthase 3, chloroplastic
Up-regulated	5	Disturbed	TraesCS1A02G428300.1	1.20254	0.0225327	putative F-box/kelch-repeat protein At1g15680
Up-regulated	5	Disturbed	TraesCS5B02G535400.1	1.20217	0.00771172	putative disease resistance protein RGA4
Up-regulated	5	Disturbed	TraesCS7A02G331100.1	1.20186	0.000293038	Auxin-responsive protein [Source:UniProtKB/TrEMBL;Acc:A0A1D6BHR3]
Up-regulated	5	Disturbed	TraesCS3A02G395800.1	1.20092	0.0464237	probable methyltransferase PMT19
Up-regulated	5	Disturbed	TraesCS6A02G238500.1	1.19918	0.0174228	vacuolar processing enzyme 1
Up-regulated	5	Disturbed	TraesCS5A02G498900.1	1.19822	0.0106351	expansin-like A1
Up-regulated	5	Disturbed	TraesCS6A02G254300.1	1.19821	0.0061647	transcription factor bHLH123-like
Up-regulated	5	Disturbed	TraesCS6A02G061100.1	1.19806	0.021416	uncharacterized protein LOC109737532
Up-regulated	5	Disturbed	TraesCS1A02G309200.3	1.19781	0.0310224	MYB transcription factor
Up-regulated	5	Disturbed	TraesCS4D02G016600.1	1.19595	0.00199327	protein MARD1
Up-regulated	5	Disturbed	TraesCS5A02G331300.1	1.19435	0.00800159	SKP1-like protein 1B
Up-regulated	5	Disturbed	TraesCS1A02G127500.1	1.19414	0.049964	S-type anion channel SLAH3
Up-regulated	5	Disturbed	TraesCS2A02G172500.1	1.19402	0.00289056	nuclear transcription factor Y subunit A9
Up-regulated	5	Disturbed	TraesCS7A02G413700.1	1.19264	0.042888	uncharacterized protein LOC109761676
Up-regulated	5	Disturbed	TraesCS5B02G535300.1	1.19105	0.0170359	Putative disease resistance protein RGA4
Up-regulated	5	Disturbed	TraesCS1B02G396000.1	1.18612	0.044487	heat stress transcription factor A-2c-like
Up-regulated	5	Disturbed	TraesCS3B02G595500.1	1.18598	0.0248688	Wall-associated receptor kinase 1
Up-regulated	5	Disturbed	TraesCS6A02G272900.1	1.18573	0.0407755	universal stress protein PHOS34
Up-regulated	5	Disturbed	TraesCS5D02G483500.1	1.18554	0.0024052	uncharacterized protein LOC109774930
Up-regulated	5	Disturbed	TraesCS4A02G485400.2	1.18483	0.0461427	Sucrose:fructan 6-fructosyltransferase [Source:UniProtKB/TrEMBL;Acc:Q8W431]
Up-regulated	5	Disturbed	TraesCS6B02G259100.1	1.1837	0.0010248	Phytosulfokine receptor 1
Up-regulated	5	Disturbed	TraesCS2D02G027200.1	1.1829	0.0278461	putative amidase C869.01
Up-regulated	5	Disturbed	TraesCS2D02G356100.1	1.17859	0.0104493	xylulose kinase-like
Up-regulated	5	Disturbed	TraesCS6B02G314700.2	1.17805	0.00103355	KH domain-containing protein At5g56140-like
Up-regulated	5	Disturbed	TraesCS3A02G525500.1	1.17595	0.0336698	hypothetical protein TRIUR3_01588
Up-regulated	5	Disturbed	TraesCS3D02G321500.1	1.17456	0.0394441	Ethylene-responsive factor-like transcription factor ERFL1a [Source:UniProtKB/TrEMBL;Acc:A7XA07]
Up-regulated	5	Disturbed	TraesCS4D02G005600.1	1.17409	0.0256583	1-aminocyclopropane-1-carboxylate oxidase homolog 1-like
Up-regulated	5	Disturbed	TraesCS7A02G314900.1	1.17389	0.042888	uncharacterized protein LOC109781204
Up-regulated	5	Disturbed	TraesCS5A02G130400.1	1.17107	0.0277426	Phytosulfokine-alpha 1 [Source:UniProtKB/TrEMBL;Acc:Q0QD30]
Up-regulated	5	Disturbed	TraesCS6D02G213000.1	1.17043	0.00480899	phytosulfokine receptor 1-like
Up-regulated	5	Disturbed	TraesCS7D02G287100.1	1.16897	0.0405257	uncharacterized protein At1g04910-like
Up-regulated	5	Disturbed	TraesCS4A02G412500.1	1.16874	0.00430524	putative transporter arsB
Up-regulated	5	Disturbed	TraesCS1D02G032200.1	1.16617	0.0033102	putative disease resistance protein At1g50180
Up-regulated	5	Disturbed	TraesCS3D02G060300.1	1.16519	0.0486831	putative receptor-like protein kinase At3g47110
Up-regulated	5	Disturbed	TraesCS2A02G301500.1	1.16467	0.00783598	hypothetical protein
Up-regulated	5	Disturbed	TraesCS3A02G182500.1	1.16412	0.0230684	unnamed protein product
Up-regulated	5	Disturbed	TraesCS4B02G114600.1	1.16212	0.0193561	BEL1-like homeodomain protein 1
Up-regulated	5	Disturbed	TraesCS7A02G396300.1	1.16147	0.0321556	cinnamoyl-CoA reductase 2-like
Up-regulated	5	Disturbed	TraesCS3D02G287300.1	1.16094	0.00655615	inorganic pyrophosphatase 1-like
Up-regulated	5	Disturbed	TraesCS6D02G144400.2	1.1588	0.0208247	light-inducible protein CPRF2-like
Up-regulated	5	Disturbed	TraesCS7B02G277700.1	1.15815	0.000408805	SPX domain-containing protein 1-like
Up-regulated	5	Disturbed	TraesCS5B02G445900.1	1.15758	0.000250725	transcription factor UNE12-like
Up-regulated	5	Disturbed	TraesCS7D02G009400.2	1.15733	0.00531051	sucrose:sucrose 1-fructosyltransferase-like
Up-regulated	5	Disturbed	TraesCS6B02G214400.1	1.15662	0.0035601	tetraspanin-2-like
Up-regulated	5	Disturbed	TraesCS3B02G175900.1	1.15654	0.0238085	Cold induced protein
Up-regulated	5	Disturbed	TraesCS5B02G563700.1	1.15588	0.0489665	Mediator of RNA polymerase II transcription subunit 13 [Source:UniProtKB/TrEMBL;Acc:A0A1D5Z6C6]
Up-regulated	5	Disturbed	TraesCS6B02G418600.1	1.15529	0.00050276	phosphate transporter PHO1-2-like
Up-regulated	5	Disturbed	TraesCS7B02G118100.1	1.15315	0.0131791	protein NSP-INTERACTING KINASE 1-like
Up-regulated	5	Disturbed	TraesCS1D02G048600.1	1.15169	0.0391983	uncharacterized protein LOC109744923
Up-regulated	5	Disturbed	TraesCS3B02G093100.1	1.15091	0.00034644	ricin B-like lectin R40G3
Up-regulated	5	Disturbed	TraesCS6B02G002300.1	1.14926	0.0273644	wall-associated receptor kinase 1-like
Up-regulated	5	Disturbed	TraesCS4D02G099600.1	1.14826	0.00311398	probable monogalactosyldiacylglycerol synthase 2, chloroplastic
Up-regulated	5	Disturbed	TraesCS2D02G455300.1	1.14428	0.0418123	unnamed protein product
Up-regulated	5	Disturbed	TraesCS7D02G339300.1	1.14186	0.011688	Auxin-responsive protein [Source:UniProtKB/TrEMBL;Acc:A0A1D6CRV1]
Up-regulated	5	Disturbed	TraesCS1B02G158600.1	1.14148	0.0407043	protein fluG
Up-regulated	5	Disturbed	TraesCS7B02G303900.1	1.13904	0.000301387	Zinc finger A20 and AN1 domain-containing stress-associated protein 8
Up-regulated	5	Disturbed	TraesCS7A02G125100.1	1.13848	0.0048312	inorganic pyrophosphatase 2-like
Up-regulated	5	Disturbed	TraesCS3D02G484000.1	1.13779	0.00279187	cysteine-rich and transmembrane domain-containing protein A-like
Up-regulated	5	Disturbed	TraesCS4B02G115800.1	1.13509	0.00161841	cyclin-T1-3-like
Up-regulated	5	Disturbed	TraesCS3B02G322000.1	1.1306	0.0285733	inorganic pyrophosphatase 1-like
Up-regulated	5	Disturbed	TraesCS2D02G197300.1	1.12963	0.0206201	NADP-dependent glyceraldehyde-3-phosphate dehydrogenase
Up-regulated	5	Disturbed	TraesCS4B02G399200.1	1.12809	0.0337089	molybdate-anion transporter-like
Up-regulated	5	Disturbed	TraesCS5D02G504300.1	1.1276	0.0481586	Dirigent protein [Source:UniProtKB/TrEMBL;Acc:A0A1D5ZJF2]
Up-regulated	5	Disturbed	TraesCS5B02G085400.2	1.12708	0.0126625	Nuclear/nucleolar GTPase 2 [Source:UniProtKB/TrEMBL;Acc:A0A341VQ60]
Up-regulated	5	Disturbed	TraesCS4D02G263000.1	1.12669	0.0426834	putative polyol transporter 1
Up-regulated	5	Disturbed	TraesCS2B02G079700.1	1.12663	0.0293479	aspartyl protease family protein 1-like
Up-regulated	5	Disturbed	TraesCS7B02G181800.2	1.12636	0.0169265	ABCF1b [Source:UniProtKB/TrEMBL;Acc:A0A2P1AAS7]
Up-regulated	5	Disturbed	TraesCS5A02G091500.1	1.12601	0.0237695	peptidyl-prolyl cis-trans isomerase G
Up-regulated	5	Disturbed	TraesCS3A02G222900.1	1.1254	0.000711758	probable aldo-keto reductase 1
Up-regulated	5	Disturbed	TraesCS6A02G380000.1	1.12055	0.000937469	phosphate transporter PHO1-2-like
Up-regulated	5	Disturbed	TraesCS4B02G216100.1	1.11984	0.0272523	uncharacterized protein LOC109775146
Up-regulated	5	Disturbed	TraesCS2B02G275500.1	1.11738	0.00589083	glycine-rich cell wall structural protein-like
Up-regulated	5	Disturbed	TraesCS3A02G391600.1	1.11707	0.000205495	Two-component response regulator [Source:UniProtKB/TrEMBL;Acc:A0A1D5VDA8]
Up-regulated	5	Disturbed	TraesCS1A02G409200.1	1.11602	0.0233601	disease resistance protein RPP13-like
Up-regulated	5	Disturbed	TraesCS2A02G220400.1	1.11509	0.0114564	glucose-6-phosphate/phosphate translocator 2, chloroplastic-like
Up-regulated	5	Disturbed	TraesCS4A02G025900.1	1.11491	0.0300137	uncharacterized protein LOC109759244
Up-regulated	5	Disturbed	TraesCS3D02G538300.1	1.11138	0.0221587	wall-associated receptor kinase 2-like
Up-regulated	5	Disturbed	TraesCS5B02G503500.1	1.10656	0.0414889	Dirigent protein [Source:UniProtKB/TrEMBL;Acc:A0A341VXB3]
Up-regulated	5	Disturbed	TraesCS1A02G328400.1	1.10631	0.0293479	hypothetical protein TRIUR3_28317
Up-regulated	5	Disturbed	TraesCS5D02G021800.1	1.10593	0.0463299	WAT1-related protein [Source:UniProtKB/TrEMBL;Acc:W5G4J4]
Up-regulated	5	Disturbed	TraesCS1B02G422900.1	1.10433	0.00457874	uncharacterized protein LOC109782568
Up-regulated	5	Disturbed	TraesCS7B02G345600.1	1.10404	0.000396229	homeobox protein BEL1 homolog
Up-regulated	5	Disturbed	TraesCS5A02G192600.1	1.10287	0.0383173	hypothetical protein TRIUR3_23276
Up-regulated	5	Disturbed	TraesCS4D02G165700.1	1.10257	0.00717172	lysine-specific demethylase JMJ25
Up-regulated	5	Disturbed	TraesCS7D02G228700.1	1.10044	0.0342187	diacylglycerol O-acyltransferase 2-like
Up-regulated	5	Disturbed	TraesCS1A02G374200.1	1.09887	0.0137346	non-specific lipid-transfer protein 2-like
Up-regulated	5	Disturbed	TraesCS4B02G213400.1	1.0985	0.0233311	unnamed protein product
Up-regulated	5	Disturbed	TraesCS6A02G154400.1	1.09814	0.00168802	putative callose synthase 8
Up-regulated	5	Disturbed	TraesCS6B02G454500.1	1.09438	0.0162701	light-harvesting complex-like protein OHP1, chloroplastic
Up-regulated	5	Disturbed	TraesCS7D02G373100.2	1.09357	0.0391983	Thiamine thiazole synthase, chloroplastic [Source:UniProtKB/TrEMBL;Acc:W5HZJ1]
Up-regulated	5	Disturbed	TraesCS7A02G044700.1	1.09133	0.0416094	disease resistance protein RPM1-like
Up-regulated	5	Disturbed	TraesCS7D02G000100.3	1.09026	0.0178221	heterotrimeric G protein alpha subunit
Up-regulated	5	Disturbed	TraesCS4B02G137200.1	1.09019	0.0272144	Ferritin [Source:UniProtKB/TrEMBL;Acc:B6UZ91]
Up-regulated	5	Disturbed	TraesCS7B02G278200.1	1.08971	0.0181481	Thiamine thiazole synthase, chloroplastic [Source:UniProtKB/TrEMBL;Acc:A0A341YG38]
Up-regulated	5	Disturbed	TraesCS4B02G112000.1	1.08847	0.00448204	abscisic stress-ripening protein
Up-regulated	5	Disturbed	TraesCS7D02G212800.1	1.08809	0.0464455	protein NSP-INTERACTING KINASE 1-like
Up-regulated	5	Disturbed	TraesCS6B02G225100.2	1.08757	0.00620263	uncharacterized protein LOC109746752
Up-regulated	5	Disturbed	TraesCS3D02G097100.1	1.08693	0.00635766	uncharacterized protein LOC109754133
Up-regulated	5	Disturbed	TraesCS3A02G424700.1	1.08598	0.0152592	cytochrome P450 CYP99A1-like
Up-regulated	5	Disturbed	TraesCS3D02G160000.1	1.0833	0.0035706	proline-rich receptor-like protein kinase PERK1
Up-regulated	5	Disturbed	TraesCS1A02G211300.1	1.08311	0.0121046	QWRF motif-containing protein 7-like
Up-regulated	5	Disturbed	TraesCS6D02G364600.1	1.08196	0.00262778	phosphate transporter PHO1-2-like
Up-regulated	5	Disturbed	TraesCS1D02G255800.1	1.08083	0.0222364	Cysteine proteinase inhibitor [Source:UniProtKB/TrEMBL;Acc:A0A341PVZ8]
Up-regulated	5	Disturbed	TraesCS2A02G042000.1	1.07676	0.0389532	phosphoglycerate mutase-like protein 1
Up-regulated	5	Disturbed	TraesCS2B02G556600.1	1.07275	0.0015904	transcription factor TGAL6-like
Up-regulated	5	Disturbed	TraesCS3D02G332200.1	1.0718	0.000294058	glycerophosphodiester phosphodiesterase GDPD1, chloroplastic-like
Up-regulated	5	Disturbed	TraesCS3B02G022900.1	1.07133	0.00147862	Glutamate decarboxylase [Source:UniProtKB/TrEMBL;Acc:A0A1D5VZC0]
Up-regulated	5	Disturbed	TraesCS4D02G195400.1	1.06746	0.00175646	phosphoinositide phosphatase SAC8
Up-regulated	5	Disturbed	TraesCS7B02G070900.1	1.06697	0.0109446	Mechanosensitive ion channel protein [Source:UniProtKB/TrEMBL;Acc:A0A1D6CIR1]
Up-regulated	5	Disturbed	TraesCS5A02G382900.1	1.06614	0.000125028	ATP sulfurylase
Up-regulated	5	Disturbed	TraesCS4D02G254800.1	1.06579	0.0443727	uncharacterized protein LOC109763007
Up-regulated	5	Disturbed	TraesCS2B02G514900.1	1.06547	0.00699969	hypothetical protein TRIUR3_30344
Up-regulated	5	Disturbed	TraesCS2A02G116100.2	1.06467	0.0083347	myb family transcription factor EFM-like
Up-regulated	5	Disturbed	TraesCS3A02G056000.1	1.06392	0.00698821	GID2 protein isoform 1 [Source:UniProtKB/TrEMBL;Acc:A0A173FEH1]
Up-regulated	5	Disturbed	TraesCS1A02G219400.1	1.06119	0.0463523	MYBS3 [Source:UniProtKB/TrEMBL;Acc:W4ZMU5]
Up-regulated	5	Disturbed	TraesCS2A02G202600.1	1.06061	0.00244048	protein STRUBBELIG-RECEPTOR FAMILY 3-like
Up-regulated	5	Disturbed	TraesCS1B02G197000.1	1.05797	0.0306041	uncharacterized protein LOC109761971
Up-regulated	5	Disturbed	TraesCS3A02G334500.1	1.057	0.00230082	somatic embryogenesis receptor kinase 1-like
Up-regulated	5	Disturbed	TraesCS3D02G187300.1	1.05553	0.0138762	respiratory burst oxidase homolog protein B-like
Up-regulated	5	Disturbed	TraesCS2B02G435700.2	1.05347	0.026858	deSI-like protein At4g17486
Up-regulated	5	Disturbed	TraesCS6A02G016200.1	1.05162	0.0113209	NEDD8-conjugating enzyme Ubc12-like
Up-regulated	5	Disturbed	TraesCS5B02G541600.1	1.05115	0.0126633	uncharacterized protein LOC109747600
Up-regulated	5	Disturbed	TraesCS6D02G136700.1	1.05056	0.0384705	Chorismate mutase [Source:UniProtKB/TrEMBL;Acc:W5H508]
Up-regulated	5	Disturbed	TraesCS4D02G032900.5	1.04887	0.0427447	Lysine--tRNA ligase [Source:UniProtKB/TrEMBL;Acc:A0A1D5Y8E2]
Up-regulated	5	Disturbed	TraesCS1B02G279100.2	1.04841	5.5499e-05	isoflavone reductase homolog IRL-like
Up-regulated	5	Disturbed	TraesCS6B02G270100.1	1.04757	0.00664669	dof zinc finger protein DOF4.6-like
Up-regulated	5	Disturbed	TraesCS1D02G067900.2	1.04646	0.0434577	uncharacterized protein ycf45
Up-regulated	5	Disturbed	TraesCS4D02G099200.1	1.04481	0.034548	Nucleoside diphosphate kinase [Source:UniProtKB/TrEMBL;Acc:A0A341UBP5]
Up-regulated	5	Disturbed	TraesCS5A02G083100.1	1.04361	0.0253474	myb-related protein MYBAS2-like
Up-regulated	5	Disturbed	TraesCS3A02G323800.1	1.04285	0.00911044	quinone reductase 2
Up-regulated	5	Disturbed	TraesCS1A02G259100.1	1.0421	0.0256407	hypothetical protein TRIUR3_12558
Up-regulated	5	Disturbed	TraesCS3B02G213700.1	1.04191	0.0407185	probable peptide/nitrate transporter At3g43790
Up-regulated	5	Disturbed	TraesCS6D02G342200.1	1.04103	0.0471114	Two-component response regulator [Source:UniProtKB/TrEMBL;Acc:A0A1D6B4L4]
Up-regulated	5	Disturbed	TraesCS3A02G444600.1	1.04094	0.0056469	Dirigent protein [Source:UniProtKB/TrEMBL;Acc:A0A1D5V8D4]
Up-regulated	5	Disturbed	TraesCS7D02G402300.1	1.03881	0.00451399	arogenate dehydrogenase 2, chloroplastic-like
Up-regulated	5	Disturbed	TraesCS3A02G326200.1	1.03842	0.0349845	FBD-associated F-box protein At4g10400-like
Up-regulated	5	Disturbed	TraesCS1D02G074400.1	1.03472	0.000274014	Metal tolerance protein 1
Up-regulated	5	Disturbed	TraesCS6D02G019200.1	1.03339	0.000352724	NEDD8-conjugating enzyme Ubc12-like
Up-regulated	5	Disturbed	TraesCS3D02G156500.1	1.03277	0.0440212	Cold induced 16 [Source:UniProtKB/TrEMBL;Acc:S6AWC2]
Up-regulated	5	Disturbed	TraesCS3B02G370300.1	1.03188	0.000817604	glycerophosphodiester phosphodiesterase GDPD1, chloroplastic-like
Up-regulated	5	Disturbed	TraesCS4A02G134300.2	1.03083	0.0351617	Non-specific serine/threonine protein kinase [Source:UniProtKB/TrEMBL;Acc:A0A341TK32]
Up-regulated	5	Disturbed	TraesCS3A02G116300.2	1.02757	0.0419882	gigantea 3
Up-regulated	5	Disturbed	TraesCS2D02G529000.1	1.02481	0.00799486	transcription factor TGAL6-like
Up-regulated	5	Disturbed	TraesCS5B02G164900.2	1.02423	0.0474662	FRIGIDA-like protein [Source:UniProtKB/TrEMBL;Acc:A0A341VB37]
Up-regulated	5	Disturbed	TraesCS7D02G173000.1	1.02356	0.0300137	uncharacterized protein LOC109739109
Up-regulated	5	Disturbed	TraesCS2D02G481500.1	1.02301	0.0444813	Anthocyanidin reductase
Up-regulated	5	Disturbed	TraesCS6D02G238500.1	1.01997	0.00128203	SPX domain-containing membrane protein Os02g45520
Up-regulated	5	Disturbed	TraesCS6D02G377200.4	1.0192	0.0452851	uncharacterized protein LOC109740014
Up-regulated	5	Disturbed	TraesCS7A02G088700.1	1.01854	0.0048312	probable sulfate transporter 3.4
Up-regulated	5	Disturbed	TraesCS3D02G056100.1	1.01835	0.0399058	GID2 protein isoform 3 (Fragment) (Fragment) [Source:UniProtKB/TrEMBL;Acc:A1E0V2]
Up-regulated	5	Disturbed	TraesCS4A02G194800.1	1.01673	0.0485308	Non-specific serine/threonine protein kinase [Source:UniProtKB/TrEMBL;Acc:A0A341TIR6]
Up-regulated	5	Disturbed	TraesCS7D02G142000.2	1.01516	0.0123476	protein SRG1-like
Up-regulated	5	Disturbed	TraesCS5A02G490800.1	1.01313	0.00339743	callose synthase 3-like
Up-regulated	5	Disturbed	TraesCS2D02G300100.1	1.013	0.0222725	loricrin-like
Up-regulated	5	Disturbed	TraesCS3A02G024100.1	1.01145	0.0470536	alanyl-tRNA synthetase, putative, expressed
Up-regulated	5	Disturbed	TraesCS6B02G266100.1	1.00598	0.0434577	vesicle-associated protein 1-2-like
Up-regulated	5	Disturbed	TraesCS7A02G319400.1	1.00549	0.0491204	MADS-box transcription factor 26
Up-regulated	5	Disturbed	TraesCS3D02G444600.1	1.00541	0.0370985	heavy metal-associated isoprenylated plant protein 35-like
Up-regulated	5	Disturbed	TraesCS7D02G397700.1	1.00331	0.0177709	A20/AN1 zinc-finger protein [Source:UniProtKB/TrEMBL;Acc:W5I3V3]
Up-regulated	5	Disturbed	TraesCS2A02G087000.2	1.0019	0.00347454	probable AMP deaminase
Up-regulated	5	Disturbed	TraesCS4A02G133400.1	1.00119	0.0010212	probable inactive receptor kinase At5g58300
Up-regulated	5	Disturbed	TraesCS6B02G023900.1	1.0009	0.00335533	NEDD8-conjugating enzyme Ubc12-like

## Sheet: 5 Weeks only Undisturbed
Tags	Week	Previous host	Disturbance	Name	logFC	FDR	Description
Up-regulated	5	O. compressus	Undisturbed	TraesCS5B02G022800.4	13.4384	2.43096e-29	5-methyltetrahydropteroyltriglutamate--homocysteine methyltransferase 1
Up-regulated	5	O. compressus	Undisturbed	TraesCS6B02G056800.1	12.0421	1.2665e-26	Catalase isozyme 2
Up-regulated	5	O. compressus	Undisturbed	TraesCS5D02G181600.3	11.7104	6.51854e-20	bifunctional aspartokinase/homoserine dehydrogenase 2, chloroplastic
Up-regulated	5	O. compressus	Undisturbed	TraesCS7B02G182800.1	11.6521	3.88038e-12	Polyadenylate-binding protein
Up-regulated	5	O. compressus	Undisturbed	TraesCS2B02G263500.1	11.5786	6.13346e-08	ubiquitin carboxyl-terminal hydrolase 12-like
Up-regulated	5	O. compressus	Undisturbed	TraesCS6A02G116500.2	11.4108	0.000677401	26S proteasome non-ATPase regulatory subunit 2 homolog
Up-regulated	5	O. compressus	Undisturbed	TraesCS1D02G245900.1	11.3802	3.43756e-28	argininosuccinate synthase, chloroplastic
Up-regulated	5	O. compressus	Undisturbed	TraesCS5B02G185200.2	11.2002	1.06024e-07	proton pump-interactor 1
Up-regulated	5	O. compressus	Undisturbed	TraesCS1A02G270700.1	11.162	6.50721e-19	Subtilisin-like protease
Up-regulated	5	O. compressus	Undisturbed	TraesCS2A02G280700.1	11.0219	2.73513e-05	Acyl-[acyl-carrier-protein] desaturase
Up-regulated	5	O. compressus	Undisturbed	TraesCS1B02G238600.3	10.967	9.30311e-21	protein trichome birefringence-like 28
Up-regulated	5	O. compressus	Undisturbed	TraesCS1A02G116200.2	10.874	1.97019e-12	Cellulose synthase
Up-regulated	5	O. compressus	Undisturbed	TraesCS5A02G279600.2	10.8107	3.60916e-10	uncharacterized protein
Up-regulated	5	O. compressus	Undisturbed	TraesCS1B02G153400.3	10.725	5.77278e-18	uncharacterized protein
Up-regulated	5	O. compressus	Undisturbed	TraesCS6A02G285900.2	10.6317	0.000290596	KH domain-containing protein At5g56140-like
Up-regulated	5	O. compressus	Undisturbed	TraesCS3D02G330500.1	10.6172	1.29602e-12	ADP-ribosylation factor 2
Up-regulated	5	O. compressus	Undisturbed	TraesCS5D02G551300.2	10.6052	9.81427e-15	Mediator of RNA polymerase II transcription subunit 13
Up-regulated	5	O. compressus	Undisturbed	TraesCS2B02G132900.1	10.4058	6.0869e-07	uncharacterized protein
Up-regulated	5	O. compressus	Undisturbed	TraesCS1A02G072000.2	10.3977	4.39507e-13	Glutamate--cysteine ligase B, chloroplastic
Up-regulated	5	O. compressus	Undisturbed	TraesCS1D02G222600.1	10.3695	7.11977e-05	D-3-phosphoglycerate dehydrogenase
Up-regulated	5	O. compressus	Undisturbed	TraesCS1B02G337800.2	10.3667	1.74091e-06	protein RNA-directed DNA methylation 3
Up-regulated	5	O. compressus	Undisturbed	TraesCS4A02G087800.1	10.3256	0.00113141	ATPase family AAA domain-containing protein 5
Up-regulated	5	O. compressus	Undisturbed	TraesCS4B02G173500.1	10.3208	2.62282e-06	guanine nucleotide exchange factor SPIKE 1
Up-regulated	5	O. compressus	Undisturbed	TraesCS1D02G265200.6	10.201	2.95554e-06	dual specificity protein phosphatase PHS1
Up-regulated	5	O. compressus	Undisturbed	TraesCS2D02G249100.4	10.1653	0.00181222	ubiquitin carboxyl-terminal hydrolase 12
Up-regulated	5	O. compressus	Undisturbed	TraesCS7D02G269200.3	10.1557	2.36019e-09	uncharacterized protein
Up-regulated	5	O. compressus	Undisturbed	TraesCS3B02G592100.2	10.1484	8.02426e-10	probable histone acetyltransferase HAC-like 3
Up-regulated	5	O. compressus	Undisturbed	TraesCS5A02G143600.1	10.1249	9.91387e-11	beta-galactosidase 15
Up-regulated	5	O. compressus	Undisturbed	TraesCS1B02G049300.3	10.119	4.04295e-07	Poly [ADP-ribose] polymerase
Up-regulated	5	O. compressus	Undisturbed	TraesCS7A02G231600.3	10.1095	5.0856e-05	Phospholipid-transporting ATPase
Up-regulated	5	O. compressus	Undisturbed	TraesCS1B02G153600.8	10.0534	0.00269923	transcription initiation factor IIF subunit alpha
Up-regulated	5	O. compressus	Undisturbed	TraesCS1D02G132200.2	10.0263	2.28485e-11	uncharacterized protein
Up-regulated	5	O. compressus	Undisturbed	TraesCS7D02G388400.3	10.0166	8.17089e-08	tryptophan synthase beta chain 2
Up-regulated	5	O. compressus	Undisturbed	TraesCS5D02G544300.3	10.0051	2.01418e-10	putative disease resistance protein RGA4
Up-regulated	5	O. compressus	Undisturbed	TraesCS4D02G154600.1	10.0018	3.08814e-06	pre-mRNA-processing factor 17
Up-regulated	5	O. compressus	Undisturbed	TraesCS7A02G328100.1	9.93281	0.000366222	probable serine/threonine-protein kinase At5g41260
Up-regulated	5	O. compressus	Undisturbed	TraesCS3D02G191600.6	9.91581	0.00739562	argonaute 4
Up-regulated	5	O. compressus	Undisturbed	TraesCS6D02G314500.2	9.89406	2.11308e-10	Kinesin-like protein
Up-regulated	5	O. compressus	Undisturbed	TraesCS5D02G211200.1	9.86821	5.4582e-05	protein TIFY 6b
Up-regulated	5	O. compressus	Undisturbed	TraesCS1D02G167000.1	9.86777	0.00154276	uncharacterized protein
Up-regulated	5	O. compressus	Undisturbed	TraesCS2A02G342900.1	9.83318	1.47135e-09	uncharacterized protein
Up-regulated	5	O. compressus	Undisturbed	TraesCS2A02G159900.1	9.80557	0.00149526	probable inactive receptor kinase At5g10020
Up-regulated	5	O. compressus	Undisturbed	TraesCS5B02G429800.2	9.79647	0.00148343	indole-3-acetaldehyde oxidase-like
Up-regulated	5	O. compressus	Undisturbed	TraesCS5D02G325000.2	9.79067	1.328e-07	subtilisin-like protease SBT3.6
Up-regulated	5	O. compressus	Undisturbed	TraesCS4A02G089800.2	9.76238	5.25783e-05	anthranilate synthase alpha 1 subunit
Up-regulated	5	O. compressus	Undisturbed	TraesCS2D02G400400.2	9.74147	0.00524347	protein CHROMATIN REMODELING 19
Up-regulated	5	O. compressus	Undisturbed	TraesCS1B02G168700.1	9.67431	5.30936e-09	DExH-box ATP-dependent RNA helicase DExH1
Up-regulated	5	O. compressus	Undisturbed	TraesCS2A02G422600.2	9.65467	0.000814675	Potassium transporter
Up-regulated	5	O. compressus	Undisturbed	TraesCS3D02G208000.3	9.65126	0.00844917	uncharacterized protein
Up-regulated	5	O. compressus	Undisturbed	TraesCS6B02G405200.1	9.63971	4.33637e-06	N-alpha-acetyltransferase 35, NatC auxiliary subunit
Up-regulated	5	O. compressus	Undisturbed	TraesCS4A02G274700.2	9.6213	1.6558e-08	uncharacterized protein
Up-regulated	5	O. compressus	Undisturbed	TraesCS6B02G360000.5	9.60961	1.03824e-07	uncharacterized protein
Up-regulated	5	O. compressus	Undisturbed	TraesCS4A02G445600.2	9.60338	0.000788216	4-hydroxyphenylacetaldehyde oxime monooxygenase-like
Up-regulated	5	O. compressus	Undisturbed	TraesCS6D02G075400.1	9.59042	1.18669e-08	stAR-related lipid transfer protein 7, mitochondrial-like
Up-regulated	5	O. compressus	Undisturbed	TraesCS6D02G311700.2	9.58226	4.32015e-07	THO complex subunit 5A
Up-regulated	5	O. compressus	Undisturbed	TraesCS5B02G113700.3	9.55826	1.50141e-07	CCR4-NOT transcription complex subunit 11-like
Up-regulated	5	O. compressus	Undisturbed	TraesCS5B02G282900.1	9.53456	9.2947e-06	Ubiquitinyl hydrolase 1
Up-regulated	5	O. compressus	Undisturbed	TraesCS3B02G416100.2	9.50642	1.67487e-07	uncharacterized protein
Up-regulated	5	O. compressus	Undisturbed	TraesCS7A02G268600.4	9.4999	0.000208082	uncharacterized protein
Up-regulated	5	O. compressus	Undisturbed	TraesCS6D02G165700.1	9.48367	0.000710974	ADP-ribosylation factor GTPase-activating protein
Up-regulated	5	O. compressus	Undisturbed	TraesCS3A02G143500.2	9.48367	0.000710974	uncharacterized protein
Up-regulated	5	O. compressus	Undisturbed	TraesCS4A02G112000.4	9.45354	3.67573e-05	rab3 GTPase-activating protein catalytic subunit
Up-regulated	5	O. compressus	Undisturbed	TraesCS2D02G217400.5	9.43361	0.000100936	Serine/threonine-protein kinase
Up-regulated	5	O. compressus	Undisturbed	TraesCS4B02G107900.2	9.39115	1.19488e-05	mRNA-capping enzyme-like
Up-regulated	5	O. compressus	Undisturbed	TraesCS5D02G167600.1	9.38992	0.000644403	CCR4-NOT transcription complex subunit 10
Up-regulated	5	O. compressus	Undisturbed	TraesCS1D02G001600.2	9.36738	5.9453e-05	probable L-gulonolactone oxidase 4
Up-regulated	5	O. compressus	Undisturbed	TraesCS3D02G079000.1	9.33626	1.62374e-07	E3 ubiquitin-protein ligase CHFR
Up-regulated	5	O. compressus	Undisturbed	TraesCS1D02G290600.2	9.31044	7.14142e-06	putative serine/threonine-protein kinase
Up-regulated	5	O. compressus	Undisturbed	TraesCS3A02G248800.10	9.30835	2.36858e-07	myosin-17-like
Up-regulated	5	O. compressus	Undisturbed	TraesCS1D02G352300.2	9.29288	4.55086e-06	protein STICHEL-like 4
Up-regulated	5	O. compressus	Undisturbed	TraesCS6A02G103200.2	9.28183	3.88116e-07	Kinesin-related protein 4
Up-regulated	5	O. compressus	Undisturbed	TraesCS2D02G443300.1	9.27542	4.52136e-05	HBS1-like protein
Up-regulated	5	O. compressus	Undisturbed	TraesCS3B02G286300.1	9.27162	2.95554e-06	Farnesyl pyrophosphate synthase B1
Up-regulated	5	O. compressus	Undisturbed	TraesCS2A02G514400.1	9.26401	0.00129625	E3 ubiquitin ligase
Up-regulated	5	O. compressus	Undisturbed	TraesCS7D02G282000.3	9.22148	0.00493739	uncharacterized protein
Up-regulated	5	O. compressus	Undisturbed	TraesCS3B02G093800.1	9.20487	1.66282e-06	C-type lectin receptor-like tyrosine-protein kinase
Up-regulated	5	O. compressus	Undisturbed	TraesCS3D02G534200.1	9.19789	1.0397e-05	Vacuolar-processing enzyme
Up-regulated	5	O. compressus	Undisturbed	TraesCS5D02G170100.3	9.18754	1.26776e-05	histone-lysine N-methyltransferase TRX1
Up-regulated	5	O. compressus	Undisturbed	TraesCS2B02G406500.3	9.1847	0.000122971	SH3 domain-containing protein 2
Up-regulated	5	O. compressus	Undisturbed	TraesCS4B02G309800.3	9.18413	2.28804e-06	uncharacterized protein (DENN superfamily)
Up-regulated	5	O. compressus	Undisturbed	TraesCS3A02G499100.2	9.18094	1.16502e-06	RNA-binding protein
Up-regulated	5	O. compressus	Undisturbed	TraesCS4B02G181000.1	9.14928	7.65276e-05	NHL repeat-containing protein 2
Up-regulated	5	O. compressus	Undisturbed	TraesCS3A02G134100.1	9.12868	0.000621318	Mannosyltransferase
Up-regulated	5	O. compressus	Undisturbed	TraesCS7B02G246900.4	9.12868	0.000621318	Mitogen-activated protein kinase
Up-regulated	5	O. compressus	Undisturbed	TraesCS7A02G561900.3	9.12022	3.47467e-05	putative disease resistance protein At1g50180
Up-regulated	5	O. compressus	Undisturbed	TraesCS5D02G140400.1	9.11528	0.0032172	L-galactono-1,4-lactone dehydrogenase
Up-regulated	5	O. compressus	Undisturbed	TraesCS3B02G449800.2	9.11309	2.62282e-06	integrator complex subunit 9
Up-regulated	5	O. compressus	Undisturbed	TraesCS2D02G217100.2	9.02463	6.94617e-06	mixed-linked glucan synthase 3
Up-regulated	5	O. compressus	Undisturbed	TraesCS4A02G183400.3	9.00892	0.00305427	transcription factor TGAL4-like
Up-regulated	5	O. compressus	Undisturbed	TraesCS2B02G132900.5	8.98796	3.82864e-06	uncharacterized protein
Up-regulated	5	O. compressus	Undisturbed	TraesCS1B02G288000.3	8.97283	0.00244467	beta-glucosidase BoGH3B-like
Up-regulated	5	O. compressus	Undisturbed	TraesCS6A02G364300.2	8.95301	0.00448216	shugoshin-1
Up-regulated	5	O. compressus	Undisturbed	TraesCS2D02G248200.2	8.94382	0.00135329	probable inactive leucine-rich repeat receptor-like protein kinase
Up-regulated	5	O. compressus	Undisturbed	TraesCS6A02G208900.3	8.90133	0.000366222	uncharacterized protein
Up-regulated	5	O. compressus	Undisturbed	TraesCS3D02G183800.2	8.89736	9.24191e-06	uncharacterized protein
Up-regulated	5	O. compressus	Undisturbed	TraesCS5D02G234000.2	8.89018	1.00502e-05	ATP-dependent 6-phosphofructokinase
Up-regulated	5	O. compressus	Undisturbed	TraesCS2D02G468900.2	8.88968	0.00236696	starch synthase 3, chloroplastic/amyloplastic-like
Up-regulated	5	O. compressus	Undisturbed	TraesCS7D02G242500.2	8.87114	0.00019033	glycerophosphodiester phosphodiesterase GDPDL4
Up-regulated	5	O. compressus	Undisturbed	TraesCS3B02G233000.1	8.85854	1.47797e-05	vacuolar processing enzyme 4
Up-regulated	5	O. compressus	Undisturbed	TraesCS4D02G242000.2	8.85375	0.000192042	uncharacterized protein
Up-regulated	5	O. compressus	Undisturbed	TraesCS3D02G355400.1	8.82024	0.00513127	pumilio homolog 1-like
Up-regulated	5	O. compressus	Undisturbed	TraesCS6B02G354800.3	8.78201	0.000189176	protein NRDE2 homolog
Up-regulated	5	O. compressus	Undisturbed	TraesCS7D02G412400.4	8.77423	1.82375e-05	Heavy metal transporting P1B-ATPase 2
Up-regulated	5	O. compressus	Undisturbed	TraesCS7B02G460900.2	8.74583	0.00229995	mediator of RNA polymerase II transcription subunit 15a-like
Up-regulated	5	O. compressus	Undisturbed	TraesCS3D02G176600.3	8.7258	0.000185907	5'-nucleotidase domain-containing protein 4
Up-regulated	5	O. compressus	Undisturbed	TraesCS3D02G068900.1	8.72101	0.000153354	Chromatin-remodeling complex ATPase
Up-regulated	5	O. compressus	Undisturbed	TraesCS7D02G120700.1	8.71463	0.000138712	hsp70-Hsp90 organizing protein 1-like
Up-regulated	5	O. compressus	Undisturbed	TraesCS5B02G386700.2	8.71283	2.62737e-05	Protein transport protein SEC23
Up-regulated	5	O. compressus	Undisturbed	TraesCS3B02G191900.1	8.71172	5.2551e-05	uncharacterized protein
Up-regulated	5	O. compressus	Undisturbed	TraesCS7B02G052800.1	8.70755	3.167e-05	BTB/POZ domain-containing protein NPY1-like
Up-regulated	5	O. compressus	Undisturbed	TraesCS3A02G223400.1	8.68864	0.00494082	N-alpha-acetyltransferase 16, NatA auxiliary subunit
Up-regulated	5	O. compressus	Undisturbed	TraesCS1D02G421100.2	8.67561	0.000108547	fatty acid amide hydrolase
Up-regulated	5	O. compressus	Undisturbed	TraesCS2B02G366000.2	8.67333	3.57857e-05	sn1-specific diacylglycerol lipase beta
Up-regulated	5	O. compressus	Undisturbed	TraesCS4D02G168400.2	8.64872	0.00489969	putative ubiquitin-like-specific protease 1
Up-regulated	5	O. compressus	Undisturbed	TraesCS5B02G002600.1	8.63766	0.00139954	CCD-B1
Up-regulated	5	O. compressus	Undisturbed	TraesCS7B02G183000.3	8.6277	0.00213717	afadin- and alpha-actinin-binding protein
Up-regulated	5	O. compressus	Undisturbed	TraesCS5A02G181500.2	8.62384	0.00886669	GDP-mannose transporter GONST4-like
Up-regulated	5	O. compressus	Undisturbed	TraesCS4B02G114800.1	8.62365	3.94321e-05	transcription factor LHW-like
Up-regulated	5	O. compressus	Undisturbed	TraesCS7D02G246700.2	8.62003	8.50834e-05	plant intracellular Ras-group-related LRR protein 4
Up-regulated	5	O. compressus	Undisturbed	TraesCS2B02G253000.1	8.61007	0.000287099	uncharacterized protein
Up-regulated	5	O. compressus	Undisturbed	TraesCS7B02G335500.2	8.59438	0.000665558	IAA-amino acid hydrolase ILR1-like 6
Up-regulated	5	O. compressus	Undisturbed	TraesCS1B02G162100.1	8.58236	4.63622e-05	uncharacterized protein
Up-regulated	5	O. compressus	Undisturbed	TraesCS5A02G380400.1	8.58036	0.000136057	CWF19-like protein 2
Up-regulated	5	O. compressus	Undisturbed	TraesCS5A02G434400.2	8.57866	0.000657411	5'-3' exoribonuclease
Up-regulated	5	O. compressus	Undisturbed	TraesCS3D02G379300.2	8.57517	0.000119064	beta-galactosidase 3
Up-regulated	5	O. compressus	Undisturbed	TraesCS1A02G313500.4	8.56717	6.1814e-05	polyubiquitin-like
Up-regulated	5	O. compressus	Undisturbed	TraesCS4B02G037900.2	8.53731	0.00029321	Lipoxygenase
Up-regulated	5	O. compressus	Undisturbed	TraesCS5D02G041000.2	8.52653	0.00108901	uncharacterized protein
Up-regulated	5	O. compressus	Undisturbed	TraesCS1D02G217100.1	8.52111	0.000161545	SH2 domain-containing protein
Up-regulated	5	O. compressus	Undisturbed	TraesCS1A02G346300.1	8.51949	0.000466441	probable LRR receptor-like serine/threonine-protein kinase At1g05700
Up-regulated	5	O. compressus	Undisturbed	TraesCS3B02G097000.3	8.51702	0.00853955	DNA excision repair protein CSB
Up-regulated	5	O. compressus	Undisturbed	TraesCS1D02G176100.2	8.50992	0.000239505	kinesin-like protein KIN-7K, chloroplastic
Up-regulated	5	O. compressus	Undisturbed	TraesCS1D02G286500.7	8.49467	0.0084211	SAC3 family protein A
Up-regulated	5	O. compressus	Undisturbed	TraesCS2D02G018000.1	8.49354	0.000138522	Pectate lyase
Up-regulated	5	O. compressus	Undisturbed	TraesCS6A02G097000.1	8.4881	0.000119064	protoheme IX farnesyltransferase, mitochondrial-like
Up-regulated	5	O. compressus	Undisturbed	TraesCS2D02G307000.2	8.4345	0.00108311	regulator of nonsense transcripts UPF3
Up-regulated	5	O. compressus	Undisturbed	TraesCS1A02G360500.1	8.4301	0.000346491	Nucleosome assembly protein 1
Up-regulated	5	O. compressus	Undisturbed	TraesCS3D02G303600.1	8.4301	0.000346491	uncharacterized protein
Up-regulated	5	O. compressus	Undisturbed	TraesCS3D02G136600.1	8.42549	0.0084211	NF-X1-type zinc finger protein NFXL2
Up-regulated	5	O. compressus	Undisturbed	TraesCS3A02G130200.5	8.41936	0.00674307	DEAD-box ATP-dependent RNA helicase 14
Up-regulated	5	O. compressus	Undisturbed	TraesCS1B02G439600.3	8.41657	0.00258494	protein timeless homolog
Up-regulated	5	O. compressus	Undisturbed	TraesCS3A02G085900.3	8.40066	0.000276798	monocopper oxidase-like protein
Up-regulated	5	O. compressus	Undisturbed	TraesCS1D02G190900.2	8.37845	0.000119064	protein RRC1-like
Up-regulated	5	O. compressus	Undisturbed	TraesCS2B02G447400.2	8.37021	0.000498854	Potassium transporter
Up-regulated	5	O. compressus	Undisturbed	TraesCS4D02G132600.1	8.33309	0.00183004	nuclear pore complex protein NUP98A
Up-regulated	5	O. compressus	Undisturbed	TraesCS5D02G444500.1	8.32353	0.000153354	kinesin-like protein
Up-regulated	5	O. compressus	Undisturbed	TraesCS6D02G189700.3	8.3142	0.00227878	probable serine/threonine-protein kinase
Up-regulated	5	O. compressus	Undisturbed	TraesCS3A02G122500.3	8.30434	0.000163555	ABC transporter G family member 31
Up-regulated	5	O. compressus	Undisturbed	TraesCS2A02G425400.2	8.30163	0.0035536	KS protein
Up-regulated	5	O. compressus	Undisturbed	TraesCS2A02G495700.1	8.30163	0.0035536	uncharacterized protein
Up-regulated	5	O. compressus	Undisturbed	TraesCS6D02G182600.2	8.24137	0.00135978	transcription factor E2FA-like
Up-regulated	5	O. compressus	Undisturbed	TraesCS5B02G384200.3	8.23582	0.000904192	vacuolar protein sorting-associated protein 18 homolog
Up-regulated	5	O. compressus	Undisturbed	TraesCS4D02G022100.2	8.20987	0.0124067	uncharacterized protein (Fer2 superfamily)
Up-regulated	5	O. compressus	Undisturbed	TraesCS1D02G405800.4	8.19495	0.00139125	E3 ubiquitin-protein ligase MBR2-like
Up-regulated	5	O. compressus	Undisturbed	TraesCS1B02G278200.1	8.18942	0.015541	RNA-binding protein 7
Up-regulated	5	O. compressus	Undisturbed	TraesCS3D02G412500.2	8.18339	0.000287099	dolichyl-diphosphooligosaccharide--protein glycosyltransferase subunit 2
Up-regulated	5	O. compressus	Undisturbed	TraesCS2B02G561800.2	8.18339	0.000287099	uncharacterized protein
Up-regulated	5	O. compressus	Undisturbed	TraesCS7D02G264900.1	8.16771	0.00805568	O-fucosyltransferase 13
Up-regulated	5	O. compressus	Undisturbed	TraesCS4A02G142800.5	8.16571	0.005601	uncharacterized protein
Up-regulated	5	O. compressus	Undisturbed	TraesCS1D02G049800.2	8.1622	0.000325802	ankyrin-3-like
Up-regulated	5	O. compressus	Undisturbed	TraesCS7A02G200400.3	8.15398	0.0125572	tRNA threonylcarbamoyladenosine dehydratase
Up-regulated	5	O. compressus	Undisturbed	TraesCS4B02G137900.4	8.15292	0.00214162	protein CHUP1, chloroplastic-like
Up-regulated	5	O. compressus	Undisturbed	TraesCS6D02G145400.4	8.14068	0.000370242	succinate-semialdehyde dehydrogenase, mitochondrial
Up-regulated	5	O. compressus	Undisturbed	TraesCS1A02G221000.2	8.13688	0.000612281	D-3-phosphoglycerate dehydrogenase, chloroplastic
Up-regulated	5	O. compressus	Undisturbed	TraesCS2A02G368900.1	8.10982	0.00138467	O-glucosyltransferase rumi homolog
Up-regulated	5	O. compressus	Undisturbed	TraesCS7A02G524400.2	8.06708	0.0005159	protein SRC2 homolog
Up-regulated	5	O. compressus	Undisturbed	TraesCS4B02G168900.1	8.04867	0.00135978	uncharacterized protein
Up-regulated	5	O. compressus	Undisturbed	TraesCS3D02G300700.2	8.04323	0.0159243	unnamed protein product (Acetamidase/Formamidase family)
Up-regulated	5	O. compressus	Undisturbed	TraesCS3D02G158300.2	8.04136	0.00420106	GTPase Der
Up-regulated	5	O. compressus	Undisturbed	TraesCS2B02G614100.2	8.04136	0.00420106	Peroxidase
Up-regulated	5	O. compressus	Undisturbed	TraesCS6D02G287700.2	8.01905	0.00330976	serine/threonine-protein kinase EDR1-like
Up-regulated	5	O. compressus	Undisturbed	TraesCS1B02G364000.2	8.01139	0.00662139	protein STICHEL-like 4
Up-regulated	5	O. compressus	Undisturbed	TraesCS1B02G305300.2	7.99697	0.000835944	uncharacterized protein
Up-regulated	5	O. compressus	Undisturbed	TraesCS4B02G209500.3	7.99144	0.00065659	uncharacterized protein
Up-regulated	5	O. compressus	Undisturbed	TraesCS3B02G003100.4	7.9639	0.00181222	uncharacterized protein
Up-regulated	5	O. compressus	Undisturbed	TraesCS4B02G351600.1	7.94589	0.00179873	alpha-L-fucosidase 2-like
Up-regulated	5	O. compressus	Undisturbed	TraesCS5A02G447900.1	7.93894	0.00524347	uncharacterized protein
Up-regulated	5	O. compressus	Undisturbed	TraesCS7D02G510800.2	7.92983	0.00772659	PX domain-containing protein EREL1
[truncated: 1,589 more rows]
