# Supplementary material for: Transcriptome Analysis of Wheat Roots Reveals a Differential Regulation of Stress Responses Related to Arbuscular Mycorrhizal Fungi and Soil Disturbance
Source: Biology (Basel). 2019 Dec 11;8(4):93. doi: 10.3390/biology8040093 (PMC6956056; doi:10.3390/biology8040093)
Supplement: Supplementary file 1 [file biology-08-00093-s001.zip › Table S6.xlsx]

## Sheet: 1 week Und vs Dis in Ornithopus
UP-REGULATED in 1 week wheat after O. compressus Undisturbed
Pathway	Pathway ID	#Enzs in Pathway	Enzyme	#Seqs of Enzyme	Seqs		Legend
Biosynthesis of antibiotics	map01130	4	ec:2.7.2.11 - 5-kinase, ec:2.2.1.6 - synthase, ec:1.2.1.41 - dehydrogenase, ec:4.2.1.20 - synthase	1, 1, 1, 1	TraesCS3D02G357200.2, TraesCS6D02G201500.1, TraesCS3D02G357200.2, TraesCS7D02G388400.3		Biosynthesis of antibiotics
Purine metabolism	map00230	3	ec:3.6.1.3 - adenylpyrophosphatase, ec:3.6.1.15 - phosphatase, ec:3.5.4.4 - deaminase	8, 17, 1	TraesCS2D02G430700.2, TraesCS4A02G046800.2, TraesCS3D02G124400.4, TraesCS5D02G142900.1, TraesCS2B02G528900.1, TraesCS4A02G178600.5, TraesCS3B02G395000.1, TraesCS3D02G258300.3, TraesCS2B02G320800.4, TraesCS2D02G430700.2, TraesCS6D02G291700.2, TraesCS1B02G479100.1, TraesCS3D02G197700.2, TraesCS5D02G142900.1, TraesCS2B02G528900.1, TraesCS1D02G176100.3, TraesCS2A02G185500.1, TraesCS3D02G258300.3, Tra…		Carbohydrate metabolism
Pyruvate metabolism	map00620	2	ec:1.1.1.39 - dehydrogenase (decarboxylating), ec:1.1.1.38 - dehydrogenase (oxaloacetate-decarboxylating)	1, 1	TraesCS3D02G285700.3, TraesCS3D02G285700.3		Nucleotide metabolism
Arginine biosynthesis	map00220	2	ec:1.4.1.2 - dehydrogenase, ec:1.4.1.3 - dehydrogenase [NAD(P)+]	1, 1	TraesCS2D02G388800.1, TraesCS2D02G388800.1		Amino acid metabolism
One carbon pool by folate	map00670	2	ec:1.5.1.3 - reductase, ec:2.1.1.45 - synthase	1, 1	TraesCS2D02G520000.2, TraesCS2D02G520000.2		Metabolism of other amino acids
Nitrogen metabolism	map00910	2	ec:1.4.1.2 - dehydrogenase, ec:1.4.1.3 - dehydrogenase [NAD(P)+]	1, 1	TraesCS2D02G388800.1, TraesCS2D02G388800.1		Lipid metabolism
Thiamine metabolism	map00730	2	ec:3.6.1.15 - phosphatase, ec:3.1.3.2 - phosphatase	17, 1	TraesCS2B02G320800.4, TraesCS2D02G430700.2, TraesCS6D02G291700.2, TraesCS1B02G479100.1, TraesCS3D02G197700.2, TraesCS5D02G142900.1, TraesCS2B02G528900.1, TraesCS1D02G176100.3, TraesCS2A02G185500.1, TraesCS3D02G258300.3, TraesCS1B02G168700.3, TraesCS2D02G385000.3, TraesCS4A02G046800.2, TraesCS3D02G124400.4, TraesCS1B02G019100.2, TraesCS4A02G178600.5, TraesCS3B02G395000.1, TraesCS5A02G286100.1		Metabolism of cofactors and vitamins
Folate biosynthesis	map00790	2	ec:1.5.1.3 - reductase, ec:4.1.3.38 - lyase	1, 1	TraesCS2D02G520000.2, TraesCS3B02G191100.2		Biosynthesis of other secondary metabolites
Alanine, aspartate and glutamate metabolism	map00250	2	ec:1.4.1.2 - dehydrogenase, ec:1.4.1.3 - dehydrogenase [NAD(P)+]	1, 1	TraesCS2D02G388800.1, TraesCS2D02G388800.1		Xenobiotics biodegradation and metabolism
Carbapenem biosynthesis	map00332	2	ec:2.7.2.11 - 5-kinase, ec:1.2.1.41 - dehydrogenase	1, 1	TraesCS3D02G357200.2, TraesCS3D02G357200.2		Energy metabolism
Porphyrin and chlorophyll metabolism	map00860	2	ec:4.2.1.24 - synthase, ec:2.5.1.61 - synthase	1, 1	TraesCS7D02G408000.3, TraesCS6D02G132500.1		Metabolism of terpenoids and polyketides
Arginine and proline metabolism	map00330	2	ec:2.7.2.11 - 5-kinase, ec:1.2.1.41 - dehydrogenase	1, 1	TraesCS3D02G357200.2, TraesCS3D02G357200.2		Glycan biosynthesis and metabolism
Lysine degradation	map00310	1	ec:2.1.1.43 - N-methyltransferase	2	TraesCS2D02G378500.1, TraesCS2B02G317900.2		Chemical structure transformation maps
Various types of N-glycan biosynthesis	map00513	1	ec:3.2.1.113 - 1,2-alpha-mannosidase	1	TraesCS1A02G126300.2		Signal transduction
Phenylalanine, tyrosine and tryptophan biosynthesis	map00400	1	ec:4.2.1.20 - synthase	1	TraesCS7D02G388400.3		Translation
Pantothenate and CoA biosynthesis	map00770	1	ec:2.2.1.6 - synthase	1	TraesCS6D02G201500.1		Immune system
Caffeine metabolism	map00232	1	ec:2.3.1.5 - N-acetyltransferase	1	TraesCS2B02G052300.1
Valine, leucine and isoleucine biosynthesis	map00290	1	ec:2.2.1.6 - synthase	1	TraesCS6D02G201500.1
Valine, leucine and isoleucine degradation	map00280	1	ec:1.1.1.31 - dehydrogenase	1	TraesCS7B02G363700.1
Nitrotoluene degradation	map00633	1	ec:2.3.1.5 - N-acetyltransferase	1	TraesCS2B02G052300.1
Amino sugar and nucleotide sugar metabolism	map00520	1	ec:2.4.1.43 - 4-alpha-galacturonosyltransferase	1	TraesCS5D02G087600.1
N-Glycan biosynthesis	map00510	1	ec:3.2.1.113 - 1,2-alpha-mannosidase	1	TraesCS1A02G126300.2
Aminoacyl-tRNA biosynthesis	map00970	1	ec:6.1.1.1 - ligase	1	TraesCS7B02G205000.1
C5-Branched dibasic acid metabolism	map00660	1	ec:2.2.1.6 - synthase	1	TraesCS6D02G201500.1
Pentose and glucuronate interconversions	map00040	1	ec:3.2.1.15 - pectin depolymerase	1	TraesCS3A02G225800.2
D-Glutamine and D-glutamate metabolism	map00471	1	ec:1.4.1.3 - dehydrogenase [NAD(P)+]	1	TraesCS2D02G388800.1
Butanoate metabolism	map00650	1	ec:2.2.1.6 - synthase	1	TraesCS6D02G201500.1
Taurine and hypotaurine metabolism	map00430	1	ec:1.4.1.2 - dehydrogenase	1	TraesCS2D02G388800.1
Riboflavin metabolism	map00740	1	ec:3.1.3.2 - phosphatase	1	TraesCS5A02G286100.1
Glycine, serine and threonine metabolism	map00260	1	ec:4.2.1.20 - synthase	1	TraesCS7D02G388400.3
Starch and sucrose metabolism	map00500	1	ec:2.4.1.12 - synthase (UDP-forming)	1	TraesCS2D02G217100.2
Drug metabolism - other enzymes	map00983	1	ec:2.3.1.5 - N-acetyltransferase	1	TraesCS2B02G052300.1
Carbon fixation in photosynthetic organisms	map00710	1	ec:1.1.1.39 - dehydrogenase (decarboxylating)	1	TraesCS3D02G285700.3
Ascorbate and aldarate metabolism	map00053	1	ec:1.3.2.3 - dehydrogenase	2	TraesCS5D02G140400.1, TraesCS5B02G132600.2
Glycosphingolipid biosynthesis - globo and isoglobo series	map00603	1	ec:2.4.1.69 - 1 galactoside alpha-(1,2)-fucosyltransferase	1	TraesCS6A02G320100.1
Other glycan degradation	map00511	1	ec:3.2.1.24 - alpha-D-mannosidase	1	TraesCS1A02G126300.2
Pyrimidine metabolism	map00240	1	ec:2.1.1.45 - synthase	1	TraesCS2D02G520000.2
Glycosphingolipid biosynthesis - lacto and neolacto series	map00601	1	ec:2.4.1.69 - 1 galactoside alpha-(1,2)-fucosyltransferase	1	TraesCS6A02G320100.1
UP-REGULATED in 1 week wheat after O. compressus Disturbed
Pathway	Pathway ID	#Enzs in Pathway	Enzyme	#Seqs of Enzyme	Seqs
Biosynthesis of antibiotics	map01130	8	ec:2.7.7.64 - uridylyltransferase, ec:2.3.1.12 - acetyltransferase, ec:2.7.1.11 - phosphohexokinase, ec:2.7.7.9 - uridylyltransferase, ec:1.2.1.3 - dehydrogenase (NAD+), ec:3.5.4.10 - cyclohydrolase, ec:2.7.1.90 - 1-phosphotransferase, ec:2.1.2.3 - formyltransferase	1, 1, 1, 1, 1, 1, 1, 1	TraesCS5B02G356300.2, TraesCS4A02G481800.2, TraesCS7A02G198200.1, TraesCS5B02G356300.2, TraesCS6B02G408100.1, TraesCS1D02G287300.2, TraesCS7A02G198200.1, TraesCS1D02G287300.2
Purine metabolism	map00230	5	ec:3.6.1.3 - adenylpyrophosphatase, ec:3.6.1.15 - phosphatase, ec:3.5.4.4 - deaminase, ec:3.5.4.10 - cyclohydrolase, ec:2.1.2.3 - formyltransferase	7, 15, 1, 1, 1	TraesCS7A02G360700.2, TraesCS6B02G304100.1, TraesCS2D02G407800.2, TraesCS3B02G173900.2, TraesCS3D02G124400.3, TraesCS4A02G178600.3, TraesCS3D02G258300.1, TraesCS7A02G360700.2, TraesCS6B02G304100.1, TraesCS3B02G173900.2, TraesCS6D02G314500.4, TraesCS2B02G221800.1, TraesCS3D02G197700.1, TraesCS3D02G258300.1, TraesCS1B02G168700.1, TraesCS2D02G407800.2, TraesCS3D02G124400.3, TraesCS6B02G365300.1, Tra…
Starch and sucrose metabolism	map00500	5	ec:2.4.1.13 - synthase, ec:3.1.3.12 - trehalose 6-phosphatase, ec:2.4.1.34 - synthase, ec:2.7.7.9 - uridylyltransferase, ec:2.4.1.12 - synthase (UDP-forming)	1, 1, 1, 1, 1	TraesCS7D02G159800.3, TraesCS1B02G224300.2, TraesCS2D02G600000.1, TraesCS5B02G356300.2, TraesCS5D02G260800.4
Glycolysis / Gluconeogenesis	map00010	4	ec:2.3.1.12 - acetyltransferase, ec:2.7.1.11 - phosphohexokinase, ec:1.2.1.3 - dehydrogenase (NAD+), ec:2.7.1.90 - 1-phosphotransferase	1, 1, 1, 1	TraesCS4A02G481800.2, TraesCS7A02G198200.1, TraesCS6B02G408100.1, TraesCS7A02G198200.1
Pyruvate metabolism	map00620	4	ec:1.1.1.39 - dehydrogenase (decarboxylating), ec:2.3.1.12 - acetyltransferase, ec:1.2.1.3 - dehydrogenase (NAD+), ec:1.1.1.38 - dehydrogenase (oxaloacetate-decarboxylating)	1, 1, 1, 1	TraesCS3D02G285700.1, TraesCS4A02G481800.2, TraesCS6B02G408100.1, TraesCS3D02G285700.1
Galactose metabolism	map00052	3	ec:2.7.7.64 - uridylyltransferase, ec:2.7.1.11 - phosphohexokinase, ec:2.7.7.9 - uridylyltransferase	1, 1, 1	TraesCS5B02G356300.2, TraesCS7A02G198200.1, TraesCS5B02G356300.2
Pentose and glucuronate interconversions	map00040	3	ec:2.7.7.64 - uridylyltransferase, ec:3.2.1.15 - pectin depolymerase, ec:2.7.7.9 - uridylyltransferase	1, 1, 1	TraesCS5B02G356300.2, TraesCS3A02G225800.1, TraesCS5B02G356300.2
Tryptophan metabolism	map00380	2	ec:1.2.1.3 - dehydrogenase (NAD+), ec:3.5.1.4 - acylamidase	1, 1	TraesCS6B02G408100.1, TraesCS2D02G039600.1
Lysine degradation	map00310	2	ec:2.1.1.43 - N-methyltransferase, ec:1.2.1.3 - dehydrogenase (NAD+)	1, 1	TraesCS2A02G382000.6, TraesCS6B02G408100.1
Glycerolipid metabolism	map00561	2	ec:2.7.7.9 - uridylyltransferase, ec:1.2.1.3 - dehydrogenase (NAD+)	1, 1	TraesCS5B02G356300.2, TraesCS6B02G408100.1
Amino sugar and nucleotide sugar metabolism	map00520	2	ec:2.7.7.64 - uridylyltransferase, ec:2.7.7.9 - uridylyltransferase	1, 1	TraesCS5B02G356300.2, TraesCS5B02G356300.2
Aminoacyl-tRNA biosynthesis	map00970	2	ec:6.1.1.6 - ligase, ec:6.1.1.5 - ligase	1, 1	TraesCS4D02G032900.3, TraesCS6D02G317100.3
Thiamine metabolism	map00730	2	ec:3.6.1.15 - phosphatase, ec:3.1.3.2 - phosphatase	15, 1	TraesCS7A02G360700.2, TraesCS6B02G304100.1, TraesCS3B02G173900.2, TraesCS6D02G314500.4, TraesCS2B02G221800.1, TraesCS3D02G197700.1, TraesCS3D02G258300.1, TraesCS1B02G168700.1, TraesCS2D02G407800.2, TraesCS3D02G124400.3, TraesCS6B02G365300.1, TraesCS3D02G248700.1, TraesCS4A02G178600.3, TraesCS3D02G302800.2, TraesCS2B02G320800.1, TraesCS5A02G286100.2
beta-Alanine metabolism	map00410	2	ec:4.1.1.15 - decarboxylase, ec:1.2.1.3 - dehydrogenase (NAD+)	1, 1	TraesCS3D02G023900.2, TraesCS6B02G408100.1
Ascorbate and aldarate metabolism	map00053	2	ec:2.7.7.64 - uridylyltransferase, ec:1.2.1.3 - dehydrogenase (NAD+)	1, 1	TraesCS5B02G356300.2, TraesCS6B02G408100.1
Pentose phosphate pathway	map00030	2	ec:2.7.1.11 - phosphohexokinase, ec:2.7.1.90 - 1-phosphotransferase	1, 1	TraesCS7A02G198200.1, TraesCS7A02G198200.1
Fructose and mannose metabolism	map00051	2	ec:2.7.1.11 - phosphohexokinase, ec:2.7.1.90 - 1-phosphotransferase	1, 1	TraesCS7A02G198200.1, TraesCS7A02G198200.1
Arginine and proline metabolism	map00330	2	ec:1.2.1.3 - dehydrogenase (NAD+), ec:3.5.1.4 - acylamidase	1, 1	TraesCS6B02G408100.1, TraesCS2D02G039600.1
Phenylpropanoid biosynthesis	map00940	1	ec:1.11.1.7 - lactoperoxidase	2	TraesCS5A02G113100.3, TraesCS3B02G212900.5
Steroid hormone biosynthesis	map00140	1	ec:1.1.1.145 - dehydrogenase	1	TraesCS4B02G151900.2
Nicotinate and nicotinamide metabolism	map00760	1	ec:2.7.1.23 - kinase	1	TraesCS1B02G200000.1
Selenocompound metabolism	map00450	1	ec:2.1.1.14 - S-methyltransferase	1	TraesCS5B02G022800.1
Steroid degradation	map00984	1	ec:1.1.1.145 - dehydrogenase	1	TraesCS4B02G151900.2
Styrene degradation	map00643	1	ec:3.5.1.4 - acylamidase	1	TraesCS2D02G039600.1
Valine, leucine and isoleucine degradation	map00280	1	ec:1.2.1.3 - dehydrogenase (NAD+)	1	TraesCS6B02G408100.1
Methane metabolism	map00680	1	ec:2.7.1.11 - phosphohexokinase	1	TraesCS7A02G198200.1
One carbon pool by folate	map00670	1	ec:2.1.2.3 - formyltransferase	1	TraesCS1D02G287300.2
Phenylalanine metabolism	map00360	1	ec:3.5.1.4 - acylamidase	1	TraesCS2D02G039600.1
Sphingolipid metabolism	map00600	1	ec:3.2.1.45 - psychosine hydrolase	1	TraesCS4B02G088800.4
Nitrogen metabolism	map00910	1	ec:4.2.1.1 - anhydrase	1	TraesCS3D02G223300.3
Aminobenzoate degradation	map00627	1	ec:3.5.1.4 - acylamidase	1	TraesCS2D02G039600.1
Histidine metabolism	map00340	1	ec:1.2.1.3 - dehydrogenase (NAD+)	1	TraesCS6B02G408100.1
Butanoate metabolism	map00650	1	ec:4.1.1.15 - decarboxylase	1	TraesCS3D02G023900.2
Riboflavin metabolism	map00740	1	ec:3.1.3.2 - phosphatase	1	TraesCS5A02G286100.2
Chloroalkane and chloroalkene degradation	map00625	1	ec:1.2.1.3 - dehydrogenase (NAD+)	1	TraesCS6B02G408100.1
Taurine and hypotaurine metabolism	map00430	1	ec:4.1.1.15 - decarboxylase	1	TraesCS3D02G023900.2
Cysteine and methionine metabolism	map00270	1	ec:2.1.1.14 - S-methyltransferase	1	TraesCS5B02G022800.1
Glycine, serine and threonine metabolism	map00260	1	ec:1.2.1.8 - dehydrogenase	1	TraesCS6B02G408100.1
Fatty acid degradation	map00071	1	ec:1.2.1.3 - dehydrogenase (NAD+)	1	TraesCS6B02G408100.1
Carbon fixation in photosynthetic organisms	map00710	1	ec:1.1.1.39 - dehydrogenase (decarboxylating)	1	TraesCS3D02G285700.1
Drug metabolism - other enzymes	map00983	1	ec:3.1.1.1 - ali-esterase	1	TraesCS6D02G317100.3
Alanine, aspartate and glutamate metabolism	map00250	1	ec:4.1.1.15 - decarboxylase	1	TraesCS3D02G023900.2
Other glycan degradation	map00511	1	ec:3.2.1.45 - psychosine hydrolase	1	TraesCS4B02G088800.4
Porphyrin and chlorophyll metabolism	map00860	1	ec:2.5.1.61 - synthase	1	TraesCS6D02G132500.2
Limonene and pinene degradation	map00903	1	ec:1.2.1.3 - dehydrogenase (NAD+)	1	TraesCS6B02G408100.1
Insect hormone biosynthesis	map00981	1	ec:1.2.1.3 - dehydrogenase (NAD+)	1	TraesCS6B02G408100.1
Citrate cycle (TCA cycle)	map00020	1	ec:2.3.1.12 - acetyltransferase	1	TraesCS4A02G481800.2

## Sheet: 1 week Und vs Dis in Lolium
UP-REGULATED in 1 week wheat after L. rigidum Undisturbed
Pathway	Pathway ID	#Enzs in Pathway	Enzyme	#Seqs of Enzyme	Seqs		Legend
Purine metabolism	map00230	2	ec:3.6.1.15 - phosphatase, ec:3.6.1.3 - adenylpyrophosphatase	24, 18	TraesCS1D02G176100.4, TraesCS2A02G304100.2, TraesCS5A02G276700.5, TraesCS3D02G257900.1, TraesCS6B02G304100.1, TraesCS3B02G148100.1, TraesCS3B02G290700.1, TraesCS7B02G016300.2, TraesCS1D02G140400.1, TraesCS3B02G401600.1, TraesCS7D02G231800.3, TraesCS3A02G129000.1, TraesCS5B02G479900.2, TraesCS3A02G258000.1, TraesCS4D02G269100.2, TraesCS3D02G234400.1, TraesCS4D02G181700.2, TraesCS1B02G354200.1, Tra…		Biosynthesis of antibiotics
Aminoacyl-tRNA biosynthesis	map00970	7	ec:6.1.1.7 - ligase, ec:6.1.1.16 - ligase, ec:6.1.1.3 - ligase, ec:6.1.1.22 - ligase, ec:6.1.1.12 - ligase, ec:6.1.1.6 - ligase, ec:6.1.1.9 - ligase	1, 1, 2, 1, 2, 4, 1	TraesCS4D02G055000.1, TraesCS1A02G145100.1, TraesCS1A02G235200.1, TraesCS1B02G248400.1, TraesCS7D02G028100.1, TraesCS5A02G327900.1, TraesCS5B02G327800.1, TraesCS4D02G032900.5, TraesCS4A02G278500.2, TraesCS3B02G282000.1, TraesCS4B02G034500.1, TraesCS2D02G249200.2		Carbohydrate metabolism
Starch and sucrose metabolism	map00500	8	ec:3.1.3.24 - phosphatase, ec:2.4.1.11 - synthase, ec:3.2.1.48 - alpha-glucosidase, ec:2.4.1.18 - branching enzyme, ec:3.2.1.20 - maltase, ec:2.4.1.12 - synthase (UDP-forming), ec:2.4.1.1 - phosphorylase, ec:3.2.1.26 - invertase	1, 1, 1, 1, 1, 1, 1, 1	TraesCS5B02G002900.1, TraesCS2D02G468900.2, TraesCS2D02G382600.2, TraesCS2B02G309500.1, TraesCS2D02G382600.2, TraesCS5B02G221600.1, TraesCS4B02G105300.1, TraesCS2D02G382600.2		Nucleotide metabolism
Glycerophospholipid metabolism	map00564	4	ec:1.1.1.8 - dehydrogenase (NAD+), ec:3.1.4.4 - D, ec:3.1.4.3 - C, ec:1.1.1.94 - dehydrogenase [NAD(P)+]	1, 1, 1, 1	TraesCS4B02G286700.2, TraesCS5B02G525600.2, TraesCS1D02G071800.3, TraesCS4B02G286700.2		Amino acid metabolism
Pyruvate metabolism	map00620	3	ec:1.1.1.39 - dehydrogenase (decarboxylating), ec:1.1.1.38 - dehydrogenase (oxaloacetate-decarboxylating), ec:6.2.1.1 - ligase	1, 1, 1	TraesCS1D02G164800.2, TraesCS1D02G164800.2, TraesCS2A02G290900.3		Metabolism of other amino acids
Biosynthesis of antibiotics	map01130	3	ec:1.4.1.14 - synthase (NADH), ec:1.1.1.35 - dehydrogenase, ec:6.2.1.1 - ligase	1, 1, 1	TraesCS3D02G266400.2, TraesCS6B02G153900.2, TraesCS2A02G290900.3		Lipid metabolism
Lysine degradation	map00310	2	ec:1.1.1.35 - dehydrogenase, ec:2.1.1.43 - N-methyltransferase	1, 1	TraesCS6B02G153900.2, TraesCS2B02G317900.3		Metabolism of cofactors and vitamins
Galactose metabolism	map00052	2	ec:3.2.1.20 - maltase, ec:3.2.1.26 - invertase	1, 1	TraesCS2D02G382600.2, TraesCS2D02G382600.2		Biosynthesis of other secondary metabolites
Ether lipid metabolism	map00565	2	ec:3.1.4.4 - D, ec:3.1.4.3 - C	1, 1	TraesCS5B02G525600.2, TraesCS1D02G071800.3		Xenobiotics biodegradation and metabolism
Nitrogen metabolism	map00910	2	ec:4.2.1.1 - anhydrase, ec:1.4.1.14 - synthase (NADH)	1, 1	TraesCS5B02G243100.2, TraesCS3D02G266400.2		Energy metabolism
Inositol phosphate metabolism	map00562	2	ec:3.1.4.11 - phospholipase C, ec:3.1.4.3 - C	1, 1	TraesCS1D02G071800.3, TraesCS1D02G071800.3		Metabolism of terpenoids and polyketides
Carbon fixation pathways in prokaryotes	map00720	2	ec:1.1.1.35 - dehydrogenase, ec:6.2.1.1 - ligase	1, 1	TraesCS6B02G153900.2, TraesCS2A02G290900.3		Glycan biosynthesis and metabolism
Thiamine metabolism	map00730	1	ec:3.6.1.15 - phosphatase	24	TraesCS1D02G176100.4, TraesCS2A02G304100.2, TraesCS5A02G276700.5, TraesCS3D02G257900.1, TraesCS6B02G304100.1, TraesCS3B02G148100.1, TraesCS3B02G290700.1, TraesCS7B02G016300.2, TraesCS1D02G140400.1, TraesCS3B02G401600.1, TraesCS7D02G231800.3, TraesCS3A02G129000.1, TraesCS5B02G479900.2, TraesCS3A02G258000.1, TraesCS4D02G269100.2, TraesCS3D02G234400.1, TraesCS4D02G181700.2, TraesCS1B02G354200.1, Tra…		Chemical structure transformation maps
Phenylpropanoid biosynthesis	map00940	1	ec:1.11.1.7 - lactoperoxidase	2	TraesCS2B02G614900.1, TraesCS1D02G080600.1		Signal transduction
Selenocompound metabolism	map00450	1	ec:4.4.1.11 - gamma-lyase	2	TraesCS1D02G184500.1, TraesCS1A02G181000.1		Translation
Sphingolipid metabolism	map00600	1	ec:3.2.1.45 - psychosine hydrolase	2	TraesCS4A02G226400.1, TraesCS4B02G088800.2		Immune system
Cysteine and methionine metabolism	map00270	1	ec:4.4.1.11 - gamma-lyase	2	TraesCS1D02G184500.1, TraesCS1A02G181000.1
Drug metabolism - other enzymes	map00983	1	ec:3.1.1.1 - ali-esterase	2	TraesCS1A02G341800.2, TraesCS2D02G249200.2
Th1 and Th2 cell differentiation	map04658	1	ec:3.1.3.16 - phosphatase	2	TraesCS3B02G277900.2, TraesCS7B02G129500.1
T cell receptor signaling pathway	map04660	1	ec:3.1.3.16 - phosphatase	2	TraesCS3B02G277900.2, TraesCS7B02G129500.1
Other glycan degradation	map00511	1	ec:3.2.1.45 - psychosine hydrolase	2	TraesCS4A02G226400.1, TraesCS4B02G088800.2
Glyoxylate and dicarboxylate metabolism	map00630	1	ec:6.2.1.1 - ligase	1	TraesCS2A02G290900.3
Glycolysis / Gluconeogenesis	map00010	1	ec:6.2.1.1 - ligase	1	TraesCS2A02G290900.3
Tryptophan metabolism	map00380	1	ec:1.1.1.35 - dehydrogenase	1	TraesCS6B02G153900.2
Caprolactam degradation	map00930	1	ec:1.1.1.35 - dehydrogenase	1	TraesCS6B02G153900.2
Nicotinate and nicotinamide metabolism	map00760	1	ec:2.7.1.23 - kinase	1	TraesCS1B02G200000.2
Fatty acid elongation	map00062	1	ec:1.1.1.35 - dehydrogenase	1	TraesCS6B02G153900.2
Valine, leucine and isoleucine degradation	map00280	1	ec:1.1.1.35 - dehydrogenase	1	TraesCS6B02G153900.2
Benzoate degradation	map00362	1	ec:1.1.1.35 - dehydrogenase	1	TraesCS6B02G153900.2
Methane metabolism	map00680	1	ec:6.2.1.1 - ligase	1	TraesCS2A02G290900.3
Toluene degradation	map00623	1	ec:1.1.1.35 - dehydrogenase	1	TraesCS6B02G153900.2
Pentose and glucuronate interconversions	map00040	1	ec:3.1.1.11 - pectin demethoxylase	1	TraesCS1A02G341800.2
Butanoate metabolism	map00650	1	ec:1.1.1.35 - dehydrogenase	1	TraesCS6B02G153900.2
Riboflavin metabolism	map00740	1	ec:2.7.7.2 - synthetase	1	TraesCS5A02G190600.2
Phosphatidylinositol signaling system	map04070	1	ec:3.1.4.11 - phospholipase C	1	TraesCS1D02G071800.3
Fatty acid degradation	map00071	1	ec:1.1.1.35 - dehydrogenase	1	TraesCS6B02G153900.2
Geraniol degradation	map00281	1	ec:1.1.1.35 - dehydrogenase	1	TraesCS6B02G153900.2
Carbon fixation in photosynthetic organisms	map00710	1	ec:1.1.1.39 - dehydrogenase (decarboxylating)	1	TraesCS1D02G164800.2
Alanine, aspartate and glutamate metabolism	map00250	1	ec:1.4.1.14 - synthase (NADH)	1	TraesCS3D02G266400.2
Propanoate metabolism	map00640	1	ec:6.2.1.1 - ligase	1	TraesCS2A02G290900.3
UP-REGULATED in 1 week wheat after L. rigidum Disturbed
Pathway	Pathway ID	#Enzs in Pathway	Enzyme	#Seqs of Enzyme	Seqs
Thiamine metabolism	map00730	2	ec:3.6.1.15 - phosphatase, ec:3.1.3.2 - phosphatase	7, 1	TraesCS1D02G135500.2, TraesCS1B02G168700.1, TraesCS4A02G046800.1, TraesCS6B02G365300.1, TraesCS6A02G103200.1, TraesCS3D02G183100.1, TraesCS4A02G386100.2, TraesCS4D02G357300.1
Purine metabolism	map00230	3	ec:3.6.1.3 - adenylpyrophosphatase, ec:3.6.1.15 - phosphatase, ec:3.5.2.17 - hydrolase	2, 7, 1	TraesCS1D02G135500.2, TraesCS4A02G046800.1, TraesCS1D02G135500.2, TraesCS1B02G168700.1, TraesCS4A02G046800.1, TraesCS6B02G365300.1, TraesCS6A02G103200.1, TraesCS3D02G183100.1, TraesCS4A02G386100.2, TraesCS4D02G200200.3
Biosynthesis of antibiotics	map01130	5	ec:5.1.3.3 - 1-epimerase, ec:2.6.1.42 - transaminase, ec:5.3.1.1 - isomerase, ec:2.7.2.3 - kinase, ec:1.1.1.27 - dehydrogenase	1, 1, 1, 1, 1	TraesCS2D02G321700.1, TraesCS4B02G235400.2, TraesCS3A02G359400.1, TraesCS1A02G313300.2, TraesCS6D02G078300.1
Glycolysis / Gluconeogenesis	map00010	4	ec:5.1.3.3 - 1-epimerase, ec:5.3.1.1 - isomerase, ec:2.7.2.3 - kinase, ec:1.1.1.27 - dehydrogenase	1, 1, 1, 1	TraesCS2D02G321700.1, TraesCS3A02G359400.1, TraesCS1A02G313300.2, TraesCS6D02G078300.1
Cysteine and methionine metabolism	map00270	4	ec:2.6.1.42 - transaminase, ec:2.1.1.14 - S-methyltransferase, ec:1.1.1.27 - dehydrogenase, ec:2.1.1.37 - (cytosine-5-)-methyltransferase	1, 1, 1, 1	TraesCS4B02G235400.2, TraesCS5B02G022800.1, TraesCS6D02G078300.1, TraesCS2B02G260800.1
Pyruvate metabolism	map00620	3	ec:1.1.1.39 - dehydrogenase (decarboxylating), ec:1.1.1.27 - dehydrogenase, ec:1.1.1.38 - dehydrogenase (oxaloacetate-decarboxylating)	1, 1, 1	TraesCS1D02G164800.3, TraesCS6D02G078300.1, TraesCS1D02G164800.3
Carbon fixation in photosynthetic organisms	map00710	3	ec:5.3.1.1 - isomerase, ec:2.7.2.3 - kinase, ec:1.1.1.39 - dehydrogenase (decarboxylating)	1, 1, 1	TraesCS3A02G359400.1, TraesCS1A02G313300.2, TraesCS1D02G164800.3
Pentose and glucuronate interconversions	map00040	2	ec:3.1.1.11 - pectin demethoxylase, ec:3.2.1.15 - pectin depolymerase	1, 1	TraesCS1A02G341800.1, TraesCS4A02G168800.2
Phenylpropanoid biosynthesis	map00940	1	ec:1.11.1.7 - lactoperoxidase	2	TraesCS2A02G572500.1, TraesCS5B02G099700.1
Lysine degradation	map00310	1	ec:2.1.1.43 - N-methyltransferase	2	TraesCS2B02G399300.1, TraesCS2D02G378500.1
Nicotinate and nicotinamide metabolism	map00760	1	ec:2.7.1.23 - kinase	2	TraesCS6D02G226300.3, TraesCS1B02G200000.1
Ether lipid metabolism	map00565	1	ec:3.1.4.4 - D	2	TraesCS7D02G531300.1, TraesCS7D02G531200.1
Biosynthesis of unsaturated fatty acids	map01040	1	ec:1.14.19.2 - 9-desaturase	2	TraesCS3D02G403800.1, TraesCS3A02G408700.1
Glycerophospholipid metabolism	map00564	1	ec:3.1.4.4 - D	2	TraesCS7D02G531300.1, TraesCS7D02G531200.1
Fatty acid biosynthesis	map00061	1	ec:1.14.19.2 - 9-desaturase	2	TraesCS3D02G403800.1, TraesCS3A02G408700.1
Sulfur metabolism	map00920	1	ec:1.8.3.1 - oxidase	1	TraesCS7A02G259700.1
Pantothenate and CoA biosynthesis	map00770	1	ec:2.6.1.42 - transaminase	1	TraesCS4B02G235400.2
Selenocompound metabolism	map00450	1	ec:2.1.1.14 - S-methyltransferase	1	TraesCS5B02G022800.1
Steroid hormone biosynthesis	map00140	1	ec:1.1.1.145 - dehydrogenase	1	TraesCS4D02G157900.3
Steroid degradation	map00984	1	ec:1.1.1.145 - dehydrogenase	1	TraesCS4D02G157900.3
Valine, leucine and isoleucine biosynthesis	map00290	1	ec:2.6.1.42 - transaminase	1	TraesCS4B02G235400.2
Valine, leucine and isoleucine degradation	map00280	1	ec:2.6.1.42 - transaminase	1	TraesCS4B02G235400.2
Galactose metabolism	map00052	1	ec:5.1.3.3 - 1-epimerase	1	TraesCS2D02G321700.1
Amino sugar and nucleotide sugar metabolism	map00520	1	ec:2.4.1.43 - 4-alpha-galacturonosyltransferase	1	TraesCS5A02G073900.2
Sphingolipid metabolism	map00600	1	ec:3.2.1.45 - psychosine hydrolase	1	TraesCS4A02G226400.2
Aminoacyl-tRNA biosynthesis	map00970	1	ec:6.1.1.19 - ligase	1	TraesCS1D02G111300.1
Glucosinolate biosynthesis	map00966	1	ec:2.6.1.42 - transaminase	1	TraesCS4B02G235400.2
Riboflavin metabolism	map00740	1	ec:3.1.3.2 - phosphatase	1	TraesCS4D02G357300.1
Inositol phosphate metabolism	map00562	1	ec:5.3.1.1 - isomerase	1	TraesCS3A02G359400.1
Starch and sucrose metabolism	map00500	1	ec:2.4.1.12 - synthase (UDP-forming)	1	TraesCS1A02G099100.1
Drug metabolism - other enzymes	map00983	1	ec:3.1.1.1 - ali-esterase	1	TraesCS1A02G341800.1
Other glycan degradation	map00511	1	ec:3.2.1.45 - psychosine hydrolase	1	TraesCS4A02G226400.2
Fructose and mannose metabolism	map00051	1	ec:5.3.1.1 - isomerase	1	TraesCS3A02G359400.1
Propanoate metabolism	map00640	1	ec:1.1.1.27 - dehydrogenase	1	TraesCS6D02G078300.1

## Sheet: 1 week only Undisturbed
UP-REGULATED in 1 week wheat after O. compressus Undisturbed
Pathway	Pathway ID	#Enzs in Pathway	Enzyme	#Seqs of Enzyme	Seqs		Legend
Biosynthesis of antibiotics	map01130	6	ec:2.7.6.1 - diphosphokinase, ec:2.7.2.11 - 5-kinase, ec:2.6.1.42 - transaminase, ec:2.3.3.1 - (Si)-synthase, ec:1.2.1.41 - dehydrogenase, ec:4.2.1.20 - synthase	1, 1, 1, 1, 1, 1	TraesCS6A02G088200.1, TraesCS3D02G357200.2, TraesCS4B02G235400.2, TraesCS6B02G194700.2, TraesCS3D02G357200.2, TraesCS7D02G388400.3		Biosynthesis of antibiotics
Purine metabolism	map00230	5	ec:2.7.6.1 - diphosphokinase, ec:3.6.1.3 - adenylpyrophosphatase, ec:3.6.1.15 - phosphatase, ec:3.5.1.5 - ec:3.5.1.5 urease, ec:3.5.4.4 - deaminase	1, 8, 17, 1, 1	TraesCS6A02G088200.1, TraesCS2D02G430700.2, TraesCS7B02G060100.3, TraesCS7B02G150600.7, TraesCS3B02G306400.3, TraesCS4A02G046800.1, TraesCS2B02G528900.1, TraesCS7A02G380900.2, TraesCS3D02G258300.3, TraesCS2D02G430700.2, TraesCS7B02G060100.3, TraesCS7B02G150600.7, TraesCS3B02G306400.3, TraesCS1A02G438600.1, TraesCS3D02G197700.2, TraesCS6A02G103200.1, TraesCS2B02G528900.1, TraesCS1D02G176100.3, Tra…		Carbohydrate metabolism
Arginine biosynthesis	map00220	3	ec:1.4.1.2 - dehydrogenase, ec:3.5.1.5 - ec:3.5.1.5 urease, ec:1.4.1.3 - dehydrogenase [NAD(P)+]	1, 1, 1	TraesCS2D02G388800.1, TraesCS5A02G484200.2, TraesCS2D02G388800.1		Nucleotide metabolism
Cysteine and methionine metabolism	map00270	3	ec:2.6.1.42 - transaminase, ec:2.1.1.37 - (cytosine-5-)-methyltransferase, ec:6.3.2.2 - ligase	1, 1, 1	TraesCS4B02G235400.2, TraesCS4B02G201800.3, TraesCS1A02G072000.2		Amino acid metabolism
Starch and sucrose metabolism	map00500	3	ec:3.2.1.4 - endo-1,4-beta-D-glucanase, ec:2.7.7.27 - adenylyltransferase, ec:2.4.1.12 - synthase (UDP-forming)	1, 1, 2	TraesCS2A02G352800.4, TraesCS7B02G183300.2, TraesCS5D02G260800.1, TraesCS2D02G217100.2		Metabolism of other amino acids
Porphyrin and chlorophyll metabolism	map00860	3	ec:4.2.1.24 - synthase, ec:6.6.1.1 - chelatase, ec:2.5.1.61 - synthase	1, 1, 1	TraesCS7D02G408000.3, TraesCS5A02G466100.2, TraesCS6D02G132500.1		Lipid metabolism
Pyruvate metabolism	map00620	2	ec:1.1.1.39 - dehydrogenase (decarboxylating), ec:1.1.1.38 - dehydrogenase (oxaloacetate-decarboxylating)	2, 2	TraesCS1D02G164800.2, TraesCS3D02G285700.3, TraesCS1D02G164800.2, TraesCS3D02G285700.3		Metabolism of cofactors and vitamins
Amino sugar and nucleotide sugar metabolism	map00520	2	ec:2.7.7.27 - adenylyltransferase, ec:2.4.1.43 - 4-alpha-galacturonosyltransferase	1, 1	TraesCS7B02G183300.2, TraesCS5B02G080300.3		Biosynthesis of other secondary metabolites
Nitrogen metabolism	map00910	2	ec:1.4.1.2 - dehydrogenase, ec:1.4.1.3 - dehydrogenase [NAD(P)+]	1, 1	TraesCS2D02G388800.1, TraesCS2D02G388800.1		Xenobiotics biodegradation and metabolism
Alanine, aspartate and glutamate metabolism	map00250	2	ec:1.4.1.2 - dehydrogenase, ec:1.4.1.3 - dehydrogenase [NAD(P)+]	1, 1	TraesCS2D02G388800.1, TraesCS2D02G388800.1		Energy metabolism
Carbapenem biosynthesis	map00332	2	ec:2.7.2.11 - 5-kinase, ec:1.2.1.41 - dehydrogenase	1, 1	TraesCS3D02G357200.2, TraesCS3D02G357200.2		Metabolism of terpenoids and polyketides
Arginine and proline metabolism	map00330	2	ec:2.7.2.11 - 5-kinase, ec:1.2.1.41 - dehydrogenase	1, 1	TraesCS3D02G357200.2, TraesCS3D02G357200.2		Glycan biosynthesis and metabolism
Glyoxylate and dicarboxylate metabolism	map00630	1	ec:2.3.3.1 - (Si)-synthase	1	TraesCS6B02G194700.2		Chemical structure transformation maps
Glutathione metabolism	map00480	1	ec:6.3.2.2 - ligase	1	TraesCS1A02G072000.2		Signal transduction
Lysine degradation	map00310	1	ec:2.1.1.43 - N-methyltransferase	2	TraesCS4D02G184600.2, TraesCS2D02G378500.1		Translation
Various types of N-glycan biosynthesis	map00513	1	ec:3.2.1.113 - 1,2-alpha-mannosidase	1	TraesCS1A02G126300.2		Immune system
Phenylalanine, tyrosine and tryptophan biosynthesis	map00400	1	ec:4.2.1.20 - synthase	1	TraesCS7D02G388400.3
Sulfur metabolism	map00920	1	ec:3.1.3.7 - nucleotidase	1	TraesCS5B02G121500.1
Pantothenate and CoA biosynthesis	map00770	1	ec:2.6.1.42 - transaminase	1	TraesCS4B02G235400.2
Glycosylphosphatidylinositol (GPI)-anchor biosynthesis	map00563	1	ec:2.4.1.198 - N-acetylglucosaminyltransferase	1	TraesCS5A02G412100.2
Valine, leucine and isoleucine biosynthesis	map00290	1	ec:2.6.1.42 - transaminase	1	TraesCS4B02G235400.2
Valine, leucine and isoleucine degradation	map00280	1	ec:2.6.1.42 - transaminase	1	TraesCS4B02G235400.2
Ether lipid metabolism	map00565	1	ec:3.1.4.4 - D	1	TraesCS5B02G200600.3
Biosynthesis of unsaturated fatty acids	map01040	1	ec:1.14.19.2 - 9-desaturase	1	TraesCS2A02G280700.1
N-Glycan biosynthesis	map00510	1	ec:3.2.1.113 - 1,2-alpha-mannosidase	1	TraesCS1A02G126300.2
Atrazine degradation	map00791	1	ec:3.5.1.5 - ec:3.5.1.5 urease	1	TraesCS5A02G484200.2
Aminoacyl-tRNA biosynthesis	map00970	1	ec:6.1.1.9 - ligase	1	TraesCS3B02G139700.1
D-Glutamine and D-glutamate metabolism	map00471	1	ec:1.4.1.3 - dehydrogenase [NAD(P)+]	1	TraesCS2D02G388800.1
Glucosinolate biosynthesis	map00966	1	ec:2.6.1.42 - transaminase	1	TraesCS4B02G235400.2
Taurine and hypotaurine metabolism	map00430	1	ec:1.4.1.2 - dehydrogenase	1	TraesCS2D02G388800.1
Glycerophospholipid metabolism	map00564	1	ec:3.1.4.4 - D	1	TraesCS5B02G200600.3
Riboflavin metabolism	map00730	1	ec:3.6.1.15 - phosphatase	17	TraesCS2D02G430700.2, TraesCS7B02G060100.3, TraesCS7B02G150600.7, TraesCS3B02G306400.3, TraesCS1A02G438600.1, TraesCS3D02G197700.2, TraesCS6A02G103200.1, TraesCS2B02G528900.1, TraesCS1D02G176100.3, TraesCS2A02G185500.1, TraesCS3D02G258300.3, TraesCS2D02G385000.3, TraesCS2B02G505400.1, TraesCS4B02G148500.2, TraesCS4A02G046800.1, TraesCS1B02G019100.2, TraesCS7A02G380900.2
Glycine, serine and threonine metabolism	map00260	1	ec:4.2.1.20 - synthase	1	TraesCS7D02G388400.3
Drug metabolism - other enzymes	map00983	1	ec:3.1.1.1 - ali-esterase	1	TraesCS3B02G139700.1
Ascorbate and aldarate metabolism	map00053	1	ec:1.3.2.3 - dehydrogenase	3	TraesCS5D02G140400.1, TraesCS5A02G132300.1, TraesCS5B02G132600.2
Carbon fixation in photosynthetic organisms	map00710	1	ec:1.1.1.39 - dehydrogenase (decarboxylating)	2	TraesCS1D02G164800.2, TraesCS3D02G285700.3
Th1 and Th2 cell differentiation	map04658	1	ec:3.1.3.16 - phosphatase	2	TraesCS1B02G466300.2, TraesCSU02G068800.1
T cell receptor signaling pathway	map04660	1	ec:3.1.3.16 - phosphatase	2	TraesCS1B02G466300.2, TraesCSU02G068800.1
Glycosphingolipid biosynthesis - globo and isoglobo series	map00603	1	ec:2.4.1.69 - 1 galactoside alpha-(1,2)-fucosyltransferase	1	TraesCS7B02G076100.1
Fatty acid biosynthesis	map00061	1	ec:1.14.19.2 - 9-desaturase	1	TraesCS2A02G280700.1
Pentose phosphate pathway	map00030	1	ec:2.7.6.1 - diphosphokinase	1	TraesCS6A02G088200.1
Other glycan degradation	map00511	1	ec:3.2.1.24 - alpha-D-mannosidase	1	TraesCS1A02G126300.2
Glycosphingolipid biosynthesis - lacto and neolacto series	map00601	1	ec:2.4.1.69 - 1 galactoside alpha-(1,2)-fucosyltransferase	1	TraesCS7B02G076100.1
Citrate cycle (TCA cycle)	map00020	1	ec:2.3.3.1 - (Si)-synthase	1	TraesCS6B02G194700.2
UP-REGULATED in 1 week wheat after L. rigidum Undisturbed
Pathway	Pathway ID	#Enzs in Pathway	Enzyme	#Seqs of Enzyme	Seqs
Starch and sucrose metabolism	map00500	10	ec:2.4.1.15 - synthase (UDP-forming), ec:3.2.1.48 - alpha-glucosidase, ec:2.4.1.34 - synthase, ec:2.4.1.14 - synthase, ec:2.4.1.18 - branching enzyme, ec:3.2.1.20 - maltase, ec:2.4.1.13 - synthase, ec:2.4.1.12 - synthase (UDP-forming), ec:3.2.1.26 - invertase, ec:2.4.1.1 - phosphorylase	1, 2, 2, 1, 2, 2, 4, 12, 2, 1	TraesCS1D02G341100.3, TraesCS2D02G382600.2, TraesCS2B02G403000.1, TraesCS3B02G230100.1, TraesCS2D02G600000.1, TraesCS4D02G088200.1, TraesCS7A02G549100.4, TraesCS7D02G535400.2, TraesCS2D02G382600.2, TraesCS2B02G403000.1, TraesCS7D02G159800.3, TraesCS4A02G446700.1, TraesCS7D02G036600.2, TraesCS7A02G040900.2, TraesCS5B02G221600.3, TraesCS5D02G230300.1, TraesCS7B02G188400.2, TraesCS3D02G289600.1, Tra…
Biosynthesis of antibiotics	map01130	8	ec:2.5.1.54 - synthase, ec:6.3.4.5 - synthase, ec:2.3.1.61 - succinyltransferase, ec:2.5.1.47 - synthase, ec:1.1.1.49 - dehydrogenase (NADP+), ec:4.3.3.7 - synthase, ec:1.11.1.6 - equilase, ec:6.2.1.1 - ligase	1, 1, 1, 1, 1, 1, 1, 1	TraesCS2D02G170400.1, TraesCS1D02G245900.1, TraesCS2A02G041100.2, TraesCS6A02G187300.1, TraesCS4A02G126200.2, TraesCS2D02G513500.1, TraesCS6A02G041700.1, TraesCS6D02G376900.2
Cysteine and methionine metabolism	map00270	5	ec:6.3.2.3 - synthase, ec:4.4.1.11 - gamma-lyase, ec:2.5.1.47 - synthase, ec:2.1.1.14 - S-methyltransferase, ec:2.1.1.37 - (cytosine-5-)-methyltransferase	1, 1, 1, 2, 1	TraesCS7B02G341200.2, TraesCS1A02G181000.1, TraesCS6A02G187300.1, TraesCS5A02G024900.3, TraesCS5B02G022800.1, TraesCS6B02G022800.1
Inositol phosphate metabolism	map00562	4	ec:3.1.4.11 - phospholipase C, ec:2.7.1.159 - 5/6-kinase, ec:3.1.4.3 - C, ec:2.7.1.134 - 1-kinase	2, 1, 2, 1	TraesCS1D02G071800.3, TraesCS1D02G071800.1, TraesCS4B02G235100.3, TraesCS1D02G071800.3, TraesCS1D02G071800.1, TraesCS4B02G235100.3
Purine metabolism	map00230	4	ec:3.6.1.15 - phosphatase, ec:3.5.1.5 - ec:3.5.1.5 urease, ec:3.6.1.3 - adenylpyrophosphatase, ec:3.5.4.4 - deaminase	59, 2, 33, 1	TraesCS1D02G176100.4, TraesCS5B02G183500.1, TraesCS7D02G114100.3, TraesCS7D02G412400.3, TraesCS2B02G429200.2, TraesCS7D02G412400.1, TraesCS3D02G258300.1, TraesCS3B02G306400.1, TraesCS3A02G069900.2, TraesCS5D02G396300.2, TraesCS2B02G505400.2, TraesCS2A02G387400.2, TraesCS2A02G228000.3, TraesCS4B02G180200.2, TraesCS1B02G354200.2, TraesCS2D02G407800.5, TraesCS7B02G254000.1, TraesCS5A02G276700.5, Tra…
Pyruvate metabolism	map00620	3	ec:1.1.1.39 - dehydrogenase (decarboxylating), ec:1.1.1.38 - dehydrogenase (oxaloacetate-decarboxylating), ec:6.2.1.1 - ligase	1, 1, 1	TraesCS3D02G285700.1, TraesCS3D02G285700.1, TraesCS6D02G376900.2
Galactose metabolism	map00052	3	ec:3.2.1.20 - maltase, ec:2.4.1.123 - 3-alpha-galactosyltransferase, ec:3.2.1.26 - invertase	2, 1, 2	TraesCS2D02G382600.2, TraesCS2B02G403000.1, TraesCS2B02G109800.1, TraesCS2D02G382600.2, TraesCS2B02G403000.1
Phenylalanine metabolism	map00360	3	ec:4.3.1.24 - ammonia-lyase, ec:3.5.1.4 - acylamidase, ec:4.3.1.25 - ammonia-lyase	3, 1, 3	TraesCS2B02G398000.2, TraesCS6D02G212400.1, TraesCS6D02G212200.1, TraesCS1D02G421100.2, TraesCS2B02G398000.2, TraesCS6D02G212400.1, TraesCS6D02G212200.1
Drug metabolism - other enzymes	map00983	3	ec:2.4.1.17 - 1-naphthol glucuronyltransferase, ec:2.7.1.48 - kinase, ec:2.3.1.5 - N-acetyltransferase	1, 1, 2	TraesCS2A02G040300.1, TraesCS5D02G292700.2, TraesCS3B02G592100.1, TraesCS3D02G530000.2
Phenylpropanoid biosynthesis	map00940	3	ec:4.3.1.24 - ammonia-lyase, ec:1.11.1.7 - lactoperoxidase, ec:4.3.1.25 - ammonia-lyase	3, 10, 3	TraesCS2B02G398000.2, TraesCS6D02G212400.1, TraesCS6D02G212200.1, TraesCS5A02G113100.3, TraesCS5A02G093600.1, TraesCS3B02G212900.5, TraesCS3B02G386600.1, TraesCS4D02G324800.1, TraesCS1A02G104200.1, TraesCS1D02G096200.1, TraesCS1D02G096300.1, TraesCS6A02G041700.1, TraesCS5A02G499900.1, TraesCS2B02G398000.2, TraesCS6D02G212400.1, TraesCS6D02G212200.1
Glyoxylate and dicarboxylate metabolism	map00630	2	ec:1.11.1.6 - equilase, ec:6.2.1.1 - ligase	1, 1	TraesCS6A02G041700.1, TraesCS6D02G376900.2
Glutathione metabolism	map00480	2	ec:6.3.2.3 - synthase, ec:1.1.1.49 - dehydrogenase (NADP+)	1, 1	TraesCS7B02G341200.2, TraesCS4A02G126200.2
Tryptophan metabolism	map00380	2	ec:3.5.1.4 - acylamidase, ec:1.11.1.6 - equilase	1, 1	TraesCS1D02G421100.2, TraesCS6A02G041700.1
Selenocompound metabolism	map00450	2	ec:4.4.1.11 - gamma-lyase, ec:2.1.1.14 - S-methyltransferase	1, 2	TraesCS1A02G181000.1, TraesCS5A02G024900.3, TraesCS5B02G022800.1
Aminoacyl-tRNA biosynthesis	map00970	2	ec:6.1.1.6 - ligase, ec:6.1.1.19 - ligase	2, 1	TraesCS4D02G032900.1, TraesCS4B02G034500.1, TraesCS1A02G107800.4
Phosphatidylinositol signaling system	map04070	2	ec:3.1.4.11 - phospholipase C, ec:2.7.1.159 - 5/6-kinase	2, 1	TraesCS1D02G071800.3, TraesCS1D02G071800.1, TraesCS4B02G235100.3
Alanine, aspartate and glutamate metabolism	map00250	2	ec:6.3.4.5 - synthase, ec:4.1.1.15 - decarboxylase	1, 1	TraesCS1D02G245900.1, TraesCS3D02G023900.2
Pyrimidine metabolism	map00240	2	ec:2.7.4.22 - kinase, ec:2.7.1.48 - kinase	1, 1	TraesCS3B02G581900.1, TraesCS5D02G292700.2
Porphyrin and chlorophyll metabolism	map00860	2	ec:2.4.1.17 - 1-naphthol glucuronyltransferase, ec:2.5.1.61 - synthase	1, 1	TraesCS2A02G040300.1, TraesCS6D02G132500.2
Sulfur metabolism	map00920	2	ec:2.5.1.47 - synthase, ec:1.8.7.1 - sulfite reductase (ferredoxin)	1, 1	TraesCS6A02G187300.1, TraesCS1A02G323400.1
Arginine biosynthesis	map00220	2	ec:3.5.1.5 - ec:3.5.1.5 urease, ec:6.3.4.5 - synthase	2, 1	TraesCS5A02G484200.1, TraesCS5B02G497700.2, TraesCS1D02G245900.1
Drug metabolism - cytochrome P450	map00982	2	ec:1.14.13.8 - monooxygenase, ec:2.4.1.17 - 1-naphthol glucuronyltransferase	1, 1	TraesCS1B02G224600.3, TraesCS2A02G040300.1
Ether lipid metabolism	map00565	2	ec:3.1.4.4 - D, ec:3.1.4.3 - C	2, 2	TraesCS5B02G525600.2, TraesCS5B02G200600.2, TraesCS1D02G071800.3, TraesCS1D02G071800.1
Riboflavin metabolism	map00740	2	ec:2.7.7.2 - synthetase, ec:3.1.3.2 - phosphatase	1, 1	TraesCS5D02G200300.1, TraesCS5A02G286100.2
Glycerophospholipid metabolism	map00564	2	ec:3.1.4.4 - D, ec:3.1.4.3 - C	2, 2	TraesCS5B02G525600.2, TraesCS5B02G200600.2, TraesCS1D02G071800.3, TraesCS1D02G071800.1
Thiamine metabolism	map00730	2	ec:3.6.1.15 - phosphatase, ec:3.1.3.2 - phosphatase	59, 1	TraesCS1D02G176100.4, TraesCS5B02G183500.1, TraesCS7D02G114100.3, TraesCS7D02G412400.3, TraesCS2B02G429200.2, TraesCS7D02G412400.1, TraesCS3D02G258300.1, TraesCS3B02G306400.1, TraesCS3A02G069900.2, TraesCS5D02G396300.2, TraesCS2B02G505400.2, TraesCS2A02G387400.2, TraesCS2A02G228000.3, TraesCS4B02G180200.2, TraesCS1B02G354200.2, TraesCS2D02G407800.5, TraesCS7B02G254000.1, TraesCS5A02G276700.5, Tra…
Other glycan degradation	map00511	2	ec:3.2.1.24 - alpha-D-mannosidase, ec:3.2.1.45 - psychosine hydrolase	1, 3	TraesCS2A02G432100.2, TraesCS1A02G152200.3, TraesCS1A02G183900.2, TraesCS4B02G088800.2
Mannose type O-glycan biosynthesis	map00515	1	ec:2.4.1.135 - 3-beta-glucuronosyltransferase	1	TraesCS2A02G040300.1
Glycolysis / Gluconeogenesis	map00010	1	ec:6.2.1.1 - ligase	1	TraesCS6D02G376900.2
Glycosaminoglycan biosynthesis - heparan sulfate / heparin	map00534	1	ec:2.4.1.135 - 3-beta-glucuronosyltransferase	1	TraesCS2A02G040300.1
Caffeine metabolism	map00232	1	ec:2.3.1.5 - N-acetyltransferase	2	TraesCS3B02G592100.1, TraesCS3D02G530000.2
Glycosylphosphatidylinositol (GPI)-anchor biosynthesis	map00563	1	ec:2.4.1.198 - N-acetylglucosaminyltransferase	2	TraesCS5D02G131700.1, TraesCS3B02G113200.2
Monobactam biosynthesis	map00261	1	ec:4.3.3.7 - synthase	1	TraesCS2D02G513500.1
Styrene degradation	map00643	1	ec:3.5.1.4 - acylamidase	1	TraesCS1D02G421100.2
Valine, leucine and isoleucine degradation	map00280	1	ec:1.1.1.31 - dehydrogenase	1	TraesCS7B02G363700.2
Nitrotoluene degradation	map00633	1	ec:2.3.1.5 - N-acetyltransferase	2	TraesCS3B02G592100.1, TraesCS3D02G530000.2
Amino sugar and nucleotide sugar metabolism	map00520	1	ec:2.4.1.43 - 4-alpha-galacturonosyltransferase	1	TraesCS5B02G320100.2
N-Glycan biosynthesis	map00510	1	ec:3.2.1.113 - 1,2-alpha-mannosidase	1	TraesCS2A02G432100.2
Metabolism of xenobiotics by cytochrome P450	map00980	1	ec:2.4.1.17 - 1-naphthol glucuronyltransferase	1	TraesCS2A02G040300.1
Atrazine degradation	map00791	1	ec:3.5.1.5 - ec:3.5.1.5 urease	2	TraesCS5A02G484200.1, TraesCS5B02G497700.2
Sphingolipid metabolism	map00600	1	ec:3.2.1.45 - psychosine hydrolase	3	TraesCS1A02G152200.3, TraesCS1A02G183900.2, TraesCS4B02G088800.2
Aminobenzoate degradation	map00627	1	ec:3.5.1.4 - acylamidase	1	TraesCS1D02G421100.2
Taurine and hypotaurine metabolism	map00430	1	ec:4.1.1.15 - decarboxylase	1	TraesCS3D02G023900.2
beta-Alanine metabolism	map00410	1	ec:4.1.1.15 - decarboxylase	1	TraesCS3D02G023900.2
Th1 and Th2 cell differentiation	map04658	1	ec:3.1.3.16 - phosphatase	2	TraesCS5D02G472100.3, TraesCS1B02G466300.1
T cell receptor signaling pathway	map04660	1	ec:3.1.3.16 - phosphatase	2	TraesCS5D02G472100.3, TraesCS1B02G466300.1
Fructose and mannose metabolism	map00051	1	ec:2.7.1.105 - phosphofructokinase 2	1	TraesCS1D02G112300.1
Arginine and proline metabolism	map00330	1	ec:3.5.1.4 - acylamidase	1	TraesCS1D02G421100.2
Lysine degradation	map00310	1	ec:2.3.1.61 - succinyltransferase	1	TraesCS2A02G041100.2
Various types of N-glycan biosynthesis	map00513	1	ec:3.2.1.113 - 1,2-alpha-mannosidase	1	TraesCS2A02G432100.2
Phenylalanine, tyrosine and tryptophan biosynthesis	map00400	1	ec:2.5.1.54 - synthase	1	TraesCS2D02G170400.1
Lysine biosynthesis	map00300	1	ec:4.3.3.7 - synthase	1	TraesCS2D02G513500.1
Steroid hormone biosynthesis	map00140	1	ec:2.4.1.17 - 1-naphthol glucuronyltransferase	1	TraesCS2A02G040300.1
Glycosaminoglycan biosynthesis - chondroitin sulfate / dermatan sulfate	map00532	1	ec:2.4.1.135 - 3-beta-glucuronosyltransferase	1	TraesCS2A02G040300.1
Retinol metabolism	map00830	1	ec:2.4.1.17 - 1-naphthol glucuronyltransferase	1	TraesCS2A02G040300.1
Methane metabolism	map00680	1	ec:6.2.1.1 - ligase	1	TraesCS6D02G376900.2
Zeatin biosynthesis	map00908	1	ec:1.5.99.12 - dehydrogenase	1	TraesCS1B02G176000.2
Nitrogen metabolism	map00910	1	ec:4.2.1.1 - anhydrase	1	TraesCS5B02G243100.2
Pentose and glucuronate interconversions	map00040	1	ec:2.4.1.17 - 1-naphthol glucuronyltransferase	1	TraesCS2A02G040300.1
Ubiquinone and other terpenoid-quinone biosynthesis	map00130	1	ec:1.6.5.2 - dehydrogenase (quinone)	1	TraesCS2A02G259000.1
Butanoate metabolism	map00650	1	ec:4.1.1.15 - decarboxylase	1	TraesCS3D02G023900.2
Carbon fixation pathways in prokaryotes	map00720	1	ec:6.2.1.1 - ligase	1	TraesCS6D02G376900.2
Ascorbate and aldarate metabolism	map00053	1	ec:2.4.1.17 - 1-naphthol glucuronyltransferase	1	TraesCS2A02G040300.1
Carbon fixation in photosynthetic organisms	map00710	1	ec:1.1.1.39 - dehydrogenase (decarboxylating)	1	TraesCS3D02G285700.1
Pentose phosphate pathway	map00030	1	ec:1.1.1.49 - dehydrogenase (NADP+)	1	TraesCS4A02G126200.2
Citrate cycle (TCA cycle)	map00020	1	ec:2.3.1.61 - succinyltransferase	1	TraesCS2A02G041100.2
Propanoate metabolism	map00640	1	ec:6.2.1.1 - ligase	1	TraesCS6D02G376900.2

## Sheet: 5 weeks only Undisturbed
UP-REGULATED in 5 week wheat after O. compressus Undisturbed
Pathway	Pathway ID	#Enzs in Pathway	Enzyme	#Seqs of Enzyme	Seqs		Legend
Tryptophan metabolism	map00380	2	ec:3.5.1.4 - acylamidase, ec:1.11.1.6 - equilase	2, 1	TraesCS3A02G347600.1, TraesCS1D02G421100.2, TraesCS6B02G056800.1		Biosynthesis of antibiotics
Purine metabolism	map00230	3	ec:3.6.1.3 - adenylpyrophosphatase, ec:3.6.1.15 - phosphatase, ec:6.3.3.1 - cyclo-ligase	10, 26, 1	TraesCS3A02G122500.3, TraesCS7D02G412400.4, TraesCS7B02G381200.1, TraesCS7A02G231600.3, TraesCS6D02G246300.2, TraesCS3D02G068900.1, TraesCS1B02G118900.1, TraesCS2A02G304900.1, TraesCS3D02G068900.3, TraesCS5A02G309700.1, TraesCS3B02G224600.1, TraesCS7D02G412400.4, TraesCS6D02G314500.2, TraesCS6D02G246300.2, TraesCS3D02G068900.1, TraesCS1D02G176100.2, TraesCS3D02G068900.3, TraesCS3A02G122500.3, Tra…		Carbohydrate metabolism
Cysteine and methionine metabolism	map00270	5	ec:2.1.1.14 - S-methyltransferase, ec:2.1.1.37 - (cytosine-5-)-methyltransferase, ec:2.7.2.4 - kinase, ec:1.1.1.3 - dehydrogenase, ec:6.3.2.2 - ligase	1, 3, 1, 1, 1	TraesCS5B02G022800.4, TraesCS2B02G260800.2, TraesCS2D02G241800.1, TraesCS2A02G235900.1, TraesCS5D02G181600.3, TraesCS5D02G181600.3, TraesCS1A02G072000.2		Nucleotide metabolism
Starch and sucrose metabolism	map00500	3	ec:2.4.1.11 - synthase, ec:2.4.1.12 - synthase (UDP-forming), ec:2.4.1.1 - phosphorylase	1, 3, 1	TraesCS2D02G468900.2, TraesCS1A02G116200.2, TraesCS6A02G286900.2, TraesCS2D02G217100.2, TraesCS4B02G105300.1		Amino acid metabolism
Biosynthesis of antibiotics	map01130	11	ec:2.5.1.10 - diphosphate synthase, ec:6.3.3.1 - cyclo-ligase, ec:2.5.1.29 - diphosphate synthase, ec:2.7.1.11 - phosphohexokinase, ec:4.1.3.27 - synthase, ec:2.7.2.4 - kinase, ec:1.1.1.3 - dehydrogenase, ec:2.5.1.1 - geranyl-diphosphate synthase, ec:6.3.4.5 - synthase, ec:4.2.1.20 - synthase, ec:1.11.1.6 - equilase	1, 1, 1, 1, 1, 1, 1, 1, 1, 1, 1	TraesCS3B02G286300.1, TraesCS4A02G364400.1, TraesCS6A02G097000.1, TraesCS5D02G234000.2, TraesCS4A02G089800.2, TraesCS5D02G181600.3, TraesCS5D02G181600.3, TraesCS3B02G286300.1, TraesCS1D02G245900.1, TraesCS7D02G388400.3, TraesCS6B02G056800.1		Metabolism of other amino acids
Terpenoid backbone biosynthesis	map00900	3	ec:2.5.1.10 - diphosphate synthase, ec:2.5.1.29 - diphosphate synthase, ec:2.5.1.1 - geranyl-diphosphate synthase	1, 1, 1	TraesCS3B02G286300.1, TraesCS6A02G097000.1, TraesCS3B02G286300.1		Lipid metabolism
Glycine, serine and threonine metabolism	map00260	3	ec:2.7.2.4 - kinase, ec:1.1.1.3 - dehydrogenase, ec:4.2.1.20 - synthase	1, 1, 1	TraesCS5D02G181600.3, TraesCS5D02G181600.3, TraesCS7D02G388400.3		Metabolism of cofactors and vitamins
Phenylalanine, tyrosine and tryptophan biosynthesis	map00400	2	ec:4.1.3.27 - synthase, ec:4.2.1.20 - synthase	1, 1	TraesCS4A02G089800.2, TraesCS7D02G388400.3		Biosynthesis of other secondary metabolites
Lysine biosynthesis	map00300	2	ec:2.7.2.4 - kinase, ec:1.1.1.3 - dehydrogenase	1, 1	TraesCS5D02G181600.3, TraesCS5D02G181600.3		Xenobiotics biodegradation and metabolism
One carbon pool by folate	map00670	2	ec:1.5.1.3 - reductase, ec:2.1.1.45 - synthase	1, 1	TraesCS2D02G520000.1, TraesCS2D02G520000.1		Energy metabolism
Alanine, aspartate and glutamate metabolism	map00250	2	ec:1.2.1.16 - dehydrogenase [NAD(P)+], ec:6.3.4.5 - synthase	1, 1	TraesCS6D02G145400.4, TraesCS1D02G245900.1		Metabolism of terpenoids and polyketides
Thiamine metabolism	map00730	1	ec:3.6.1.15 - phosphatase	26	TraesCS3B02G224600.1, TraesCS7D02G412400.4, TraesCS6D02G314500.2, TraesCS6D02G246300.2, TraesCS3D02G068900.1, TraesCS1D02G176100.2, TraesCS3D02G068900.3, TraesCS3A02G122500.3, TraesCS3A02G200400.3, TraesCS1B02G168700.1, TraesCS7A02G231600.3, TraesCS5D02G444500.1, TraesCS2A02G344500.1, TraesCS2D02G443300.1, TraesCS5D02G087800.1, TraesCS6D02G165700.1, TraesCS2B02G229500.1, TraesCS5D02G041000.2, Tra…		Glycan biosynthesis and metabolism
Phenylpropanoid biosynthesis	map00940	1	ec:1.11.1.7 - lactoperoxidase	3	TraesCS6B02G071200.1, TraesCS2B02G614100.2, TraesCS6B02G056800.1		Chemical structure transformation maps
Caffeine metabolism	map00232	1	ec:2.3.1.5 - N-acetyltransferase	2	TraesCS3B02G592100.2, TraesCS4D02G264300.1		Signal transduction
Styrene degradation	map00643	1	ec:3.5.1.4 - acylamidase	2	TraesCS3A02G347600.1, TraesCS1D02G421100.2		Translation
Nitrotoluene degradation	map00633	1	ec:2.3.1.5 - N-acetyltransferase	2	TraesCS3B02G592100.2, TraesCS4D02G264300.1		Immune system
Phenylalanine metabolism	map00360	1	ec:3.5.1.4 - acylamidase	2	TraesCS3A02G347600.1, TraesCS1D02G421100.2
mTOR signaling pathway	map04150	1	ec:2.7.11.24 - protein kinase	2	TraesCS1D02G422800.3, TraesCS7B02G246900.4
Aminobenzoate degradation	map00627	1	ec:3.5.1.4 - acylamidase	2	TraesCS3A02G347600.1, TraesCS1D02G421100.2
Drug metabolism - other enzymes	map00983	1	ec:2.3.1.5 - N-acetyltransferase	2	TraesCS3B02G592100.2, TraesCS4D02G264300.1
Th1 and Th2 cell differentiation	map04658	1	ec:3.1.3.16 - phosphatase	2	TraesCS1D02G265200.6, TraesCS4B02G107900.2
T cell receptor signaling pathway	map04660	1	ec:3.1.3.16 - phosphatase	2	TraesCS1D02G265200.6, TraesCS4B02G107900.2
Arginine and proline metabolism	map00330	1	ec:3.5.1.4 - acylamidase	2	TraesCS3A02G347600.1, TraesCS1D02G421100.2
Glyoxylate and dicarboxylate metabolism	map00630	1	ec:1.11.1.6 - equilase	1	TraesCS6B02G056800.1
Glycolysis / Gluconeogenesis	map00010	1	ec:2.7.1.11 - phosphohexokinase	1	TraesCS5D02G234000.2
Glutathione metabolism	map00480	1	ec:6.3.2.2 - ligase	1	TraesCS1A02G072000.2
Sulfur metabolism	map00920	1	ec:3.1.3.7 - nucleotidase	1	TraesCS5B02G121500.1
Nicotinate and nicotinamide metabolism	map00760	1	ec:1.2.1.16 - dehydrogenase [NAD(P)+]	1	TraesCS6D02G145400.4
Selenocompound metabolism	map00450	1	ec:2.1.1.14 - S-methyltransferase	1	TraesCS5B02G022800.4
Monobactam biosynthesis	map00261	1	ec:2.7.2.4 - kinase	1	TraesCS5D02G181600.3
Arginine biosynthesis	map00220	1	ec:6.3.4.5 - synthase	1	TraesCS1D02G245900.1
Valine, leucine and isoleucine degradation	map00280	1	ec:3.1.2.4 - hydrolase	1	TraesCS7D02G352500.2
Galactose metabolism	map00052	1	ec:2.7.1.11 - phosphohexokinase	1	TraesCS5D02G234000.2
Phenazine biosynthesis	map00405	1	ec:4.1.3.27 - synthase	1	TraesCS4A02G089800.2
Methane metabolism	map00680	1	ec:2.7.1.11 - phosphohexokinase	1	TraesCS5D02G234000.2
Biosynthesis of unsaturated fatty acids	map01040	1	ec:1.14.19.2 - 9-desaturase	1	TraesCS2A02G280700.1
Pentose and glucuronate interconversions	map00040	1	ec:4.2.2.2 - lyase	1	TraesCS2D02G018000.1
Aminoacyl-tRNA biosynthesis	map00970	1	ec:6.1.1.19 - ligase	1	TraesCS1B02G129900.2
Tyrosine metabolism	map00350	1	ec:1.2.1.16 - dehydrogenase [NAD(P)+]	1	TraesCS6D02G145400.4
Butanoate metabolism	map00650	1	ec:1.2.1.16 - dehydrogenase [NAD(P)+]	1	TraesCS6D02G145400.4
Folate biosynthesis	map00790	1	ec:1.5.1.3 - reductase	1	TraesCS2D02G520000.1
beta-Alanine metabolism	map00410	1	ec:3.1.2.4 - hydrolase	1	TraesCS7D02G352500.2
Ascorbate and aldarate metabolism	map00053	1	ec:1.3.2.3 - dehydrogenase	1	TraesCS5D02G140400.1
Fatty acid biosynthesis	map00061	1	ec:1.14.19.2 - 9-desaturase	1	TraesCS2A02G280700.1
Pentose phosphate pathway	map00030	1	ec:2.7.1.11 - phosphohexokinase	1	TraesCS5D02G234000.2
Other glycan degradation	map00511	1	ec:3.2.1.51 - alpha-fucosidase	1	TraesCS4B02G351600.1
Pyrimidine metabolism	map00240	1	ec:2.1.1.45 - synthase	1	TraesCS2D02G520000.1
Fructose and mannose metabolism	map00051	1	ec:2.7.1.11 - phosphohexokinase	1	TraesCS5D02G234000.2
Propanoate metabolism	map00640	1	ec:3.1.2.4 - hydrolase	1	TraesCS7D02G352500.2
UP-REGULATED in 5 week wheat after L. rigidum Undisturbed
Pathway	Pathway ID	#Enzs in Pathway	Enzyme	#Seqs of Enzyme	Seqs
Biosynthesis of antibiotics	map01130	18	ec:5.1.3.3 - 1-epimerase, ec:1.17.7.1 - synthase (ferredoxin), ec:2.5.1.29 - diphosphate synthase, ec:4.1.1.32 - carboxykinase (GTP), ec:2.5.1.21 - synthase, ec:1.1.1.95 - dehydrogenase, ec:2.7.1.2 - glucokinase (phosphorylating), ec:2.5.1.47 - synthase, ec:2.5.1.10 - diphosphate synthase, ec:2.2.1.7 - synthase, ec:2.7.1.11 - phosphohexokinase, ec:2.7.1.40 - kinase, ec:2.7.1.1 - hexokinase type I…	1, 2, 1, 2, 1, 1, 1, 2, 1, 2, 3, 1, 1, 2, 1, 1, 1, 1	TraesCS2D02G322200.1, TraesCS4A02G251600.1, TraesCS6D02G197800.1, TraesCS5D02G026000.1, TraesCS7D02G333900.1, TraesCS7A02G345400.1, TraesCS5D02G026000.1, TraesCS3A02G146800.1, TraesCS3D02G276000.3, TraesCS5D02G027600.1, TraesCS5B02G018700.1, TraesCS5D02G026000.1, TraesCS2B02G626400.1, TraesCS2A02G565400.1, TraesCS5D02G234000.1, TraesCS3A02G107600.1, TraesCS3D02G109600.1, TraesCS4D02G104100.1, Tra…
Starch and sucrose metabolism	map00500	14	ec:2.4.1.15 - synthase (UDP-forming), ec:2.4.1.11 - synthase, ec:3.2.1.48 - alpha-glucosidase, ec:2.4.1.34 - synthase, ec:2.4.1.14 - synthase, ec:2.4.1.18 - branching enzyme, ec:3.2.1.20 - maltase, ec:3.2.1.4 - endo-1,4-beta-D-glucanase, ec:2.7.1.2 - glucokinase (phosphorylating), ec:2.4.1.13 - synthase, ec:2.7.1.1 - hexokinase type IV glucokinase, ec:2.4.1.12 - synthase (UDP-forming), ec:3.2.1.2…	1, 1, 2, 1, 1, 1, 2, 1, 1, 2, 1, 2, 2, 1	TraesCS1A02G064800.3, TraesCS1B02G155700.3, TraesCS6D02G026400.1, TraesCS6B02G031600.1, TraesCS5D02G111000.2, TraesCS4A02G225100.1, TraesCS7A02G549100.3, TraesCS6D02G026400.1, TraesCS6B02G031600.1, TraesCS4B02G066700.1, TraesCS3D02G276000.3, TraesCS7D02G159800.3, TraesCS7A02G158900.1, TraesCS3D02G276000.3, TraesCS2B02G236400.1, TraesCS5B02G221600.3, TraesCS6D02G026400.1, TraesCS6B02G031600.1, Tra…
Glycolysis / Gluconeogenesis	map00010	8	ec:5.1.3.3 - 1-epimerase, ec:4.1.1.32 - carboxykinase (GTP), ec:2.7.1.2 - glucokinase (phosphorylating), ec:2.7.1.11 - phosphohexokinase, ec:2.7.1.40 - kinase, ec:2.7.1.1 - hexokinase type IV glucokinase, ec:4.2.1.11 - hydratase, ec:6.2.1.1 - ligase	1, 2, 1, 3, 1, 1, 2, 1	TraesCS2D02G322200.1, TraesCS7D02G333900.1, TraesCS7A02G345400.1, TraesCS3D02G276000.3, TraesCS5D02G234000.1, TraesCS3A02G107600.1, TraesCS3D02G109600.1, TraesCS4D02G104100.1, TraesCS3D02G276000.3, TraesCS7D02G071200.1, TraesCS7A02G075600.1, TraesCS2A02G290900.2
Galactose metabolism	map00052	8	ec:5.1.3.3 - 1-epimerase, ec:3.2.1.20 - maltase, ec:2.4.1.123 - 3-alpha-galactosyltransferase, ec:2.7.1.2 - glucokinase (phosphorylating), ec:3.2.1.23 - lactase (ambiguous), ec:2.7.1.11 - phosphohexokinase, ec:2.7.1.1 - hexokinase type IV glucokinase, ec:3.2.1.26 - invertase	1, 2, 1, 1, 2, 3, 1, 2	TraesCS2D02G322200.1, TraesCS6D02G026400.1, TraesCS6B02G031600.1, TraesCS4B02G179300.1, TraesCS3D02G276000.3, TraesCS4B02G220500.1, TraesCS4D02G220800.1, TraesCS5D02G234000.1, TraesCS3A02G107600.1, TraesCS3D02G109600.1, TraesCS3D02G276000.3, TraesCS6D02G026400.1, TraesCS6B02G031600.1
Methane metabolism	map00680	6	ec:1.1.1.95 - dehydrogenase, ec:4.1.1.31 - carboxylase, ec:2.7.1.29 - kinase, ec:2.7.1.11 - phosphohexokinase, ec:4.2.1.11 - hydratase, ec:6.2.1.1 - ligase	1, 2, 1, 3, 2, 1	TraesCS3A02G146800.1, TraesCS7D02G333900.1, TraesCS7A02G345400.1, TraesCS4D02G051400.3, TraesCS5D02G234000.1, TraesCS3A02G107600.1, TraesCS3D02G109600.1, TraesCS7D02G071200.1, TraesCS7A02G075600.1, TraesCS2A02G290900.2
Pyruvate metabolism	map00620	5	ec:4.1.1.32 - carboxykinase (GTP), ec:4.4.1.5 - lyase, ec:4.1.1.31 - carboxylase, ec:2.7.1.40 - kinase, ec:6.2.1.1 - ligase	2, 1, 2, 1, 1	TraesCS7D02G333900.1, TraesCS7A02G345400.1, TraesCS2D02G069300.2, TraesCS7D02G333900.1, TraesCS7A02G345400.1, TraesCS4D02G104100.1, TraesCS2A02G290900.2
Amino sugar and nucleotide sugar metabolism	map00520	5	ec:3.2.1.14 - ChiC, ec:2.7.1.2 - glucokinase (phosphorylating), ec:3.2.1.52 - hexosaminidase, ec:2.7.1.1 - hexokinase type IV glucokinase, ec:3.2.1.55 - end alpha-L-arabinofuranosidase	3, 1, 2, 1, 3	TraesCS2D02G033100.1, TraesCS2A02G033600.1, TraesCS1D02G207100.1, TraesCS3D02G276000.3, TraesCS3B02G434500.1, TraesCS3D02G396400.1, TraesCS3D02G276000.3, TraesCS4D02G125100.2, TraesCS4A02G188300.2, TraesCS2D02G097800.2
Phenylpropanoid biosynthesis	map00940	5	ec:1.1.1.195 - dehydrogenase, ec:1.2.1.44 - reductase, ec:4.3.1.24 - ammonia-lyase, ec:1.11.1.7 - lactoperoxidase, ec:4.3.1.25 - ammonia-lyase	1, 2, 9, 47, 9	TraesCS6A02G173700.1, TraesCS5A02G163400.1, TraesCS5B02G223700.1, TraesCS4A02G401300.1, TraesCS6D02G212400.1, TraesCS2D02G377600.1, TraesCS2B02G398400.1, TraesCS2A02G380900.1, TraesCS6D02G212200.1, TraesCS1A02G037700.1, TraesCS2B02G398200.1, TraesCS2A02G381100.1, TraesCS2B02G126300.1, TraesCS4D02G117100.1, TraesCS2D02G107900.1, TraesCS3A02G280200.1, TraesCS4A02G196400.1, TraesCS7A02G474200.1, Tra…
Other glycan degradation	map00511	5	ec:3.2.1.51 - alpha-fucosidase, ec:3.2.1.25 - mannanase, ec:3.2.1.23 - lactase (ambiguous), ec:3.2.1.52 - hexosaminidase, ec:3.2.1.45 - psychosine hydrolase	2, 1, 2, 2, 3	TraesCS5B02G309700.1, TraesCS4B02G351600.2, TraesCS1B02G255900.2, TraesCS4B02G220500.1, TraesCS4D02G220800.1, TraesCS3B02G434500.1, TraesCS3D02G396400.1, TraesCS7A02G320000.2, TraesCS7B02G221100.2, TraesCS4A02G226400.1
Purine metabolism	map00230	4	ec:3.6.1.15 - phosphatase, ec:3.6.1.3 - adenylpyrophosphatase, ec:2.7.1.40 - kinase, ec:3.5.2.17 - hydrolase	51, 39, 1, 1	TraesCS1D02G345100.1, TraesCS7D02G412400.1, TraesCS4B02G343800.2, TraesCS2A02G387400.2, TraesCS7D02G386500.1, TraesCS2D02G407800.5, TraesCS2A02G502400.1, TraesCS4D02G176300.2, TraesCS5B02G479900.1, TraesCS2B02G221800.1, TraesCS1A02G213900.2, TraesCS7A02G391000.1, TraesCS1B02G356200.1, TraesCS5A02G249900.1, TraesCS1A02G342900.3, TraesCS5A02G467600.1, TraesCS7B02G381200.2, TraesCS7D02G298600.1, Tra…
Terpenoid backbone biosynthesis	map00900	4	ec:1.17.7.1 - synthase (ferredoxin), ec:2.5.1.29 - diphosphate synthase, ec:2.5.1.10 - diphosphate synthase, ec:2.2.1.7 - synthase	2, 1, 1, 2	TraesCS4A02G251600.1, TraesCS6D02G197800.1, TraesCS5D02G026000.1, TraesCS5D02G026000.1, TraesCS2B02G626400.1, TraesCS2A02G565400.1
Glyoxylate and dicarboxylate metabolism	map00630	3	ec:6.3.1.2 - synthetase, ec:1.11.1.6 - equilase, ec:6.2.1.1 - ligase	3, 1, 1	TraesCS4A02G063800.1, TraesCS4B02G240900.1, TraesCS4D02G240700.1, TraesCS6B02G056800.2, TraesCS2A02G290900.2
Glutathione metabolism	map00480	3	ec:1.11.1.9 - peroxidase, ec:3.4.19.13 - hydrolase, ec:2.5.1.18 - transferase	1, 1, 3	TraesCS6A02G246400.1, TraesCS2D02G321200.3, TraesCS6B02G080000.1, TraesCS1D02G081200.1, TraesCS3B02G334500.1
Phenylalanine metabolism	map00360	3	ec:4.3.1.24 - ammonia-lyase, ec:1.4.3.21 - oxidase, ec:4.3.1.25 - ammonia-lyase	9, 1, 9	TraesCS4A02G401300.1, TraesCS6D02G212400.1, TraesCS2D02G377600.1, TraesCS2B02G398400.1, TraesCS2A02G380900.1, TraesCS6D02G212200.1, TraesCS1A02G037700.1, TraesCS2B02G398200.1, TraesCS2A02G381100.1, TraesCS2D02G335300.1, TraesCS4A02G401300.1, TraesCS6D02G212400.1, TraesCS2D02G377600.1, TraesCS2B02G398400.1, TraesCS2A02G380900.1, TraesCS6D02G212200.1, TraesCS1A02G037700.1, TraesCS2B02G398200.1, Tra…
Cysteine and methionine metabolism	map00270	3	ec:4.4.1.14 - synthase, ec:2.5.1.47 - synthase, ec:2.1.1.14 - S-methyltransferase	1, 2, 1	TraesCS3B02G125200.1, TraesCS5D02G027600.1, TraesCS5B02G018700.1, TraesCS5B02G022800.1
Glycine, serine and threonine metabolism	map00260	3	ec:1.1.1.95 - dehydrogenase, ec:1.4.3.21 - oxidase, ec:4.2.1.20 - synthase	1, 1, 1	TraesCS3A02G146800.1, TraesCS2D02G335300.1, TraesCS7B02G294800.1
Drug metabolism - other enzymes	map00983	3	ec:3.1.1.1 - ali-esterase, ec:2.5.1.18 - transferase, ec:2.3.1.5 - N-acetyltransferase	1, 3, 3	TraesCS4A02G087100.1, TraesCS6B02G080000.1, TraesCS1D02G081200.1, TraesCS3B02G334500.1, TraesCS2D02G038100.1, TraesCS3B02G592100.1, TraesCS2A02G039500.2
Thiamine metabolism	map00730	3	ec:3.6.1.15 - phosphatase, ec:2.2.1.7 - synthase, ec:3.1.3.2 - phosphatase	51, 2, 2	TraesCS1D02G345100.1, TraesCS7D02G412400.1, TraesCS4B02G343800.2, TraesCS2A02G387400.2, TraesCS7D02G386500.1, TraesCS2D02G407800.5, TraesCS2A02G502400.1, TraesCS4D02G176300.2, TraesCS5B02G479900.1, TraesCS2B02G221800.1, TraesCS1A02G213900.2, TraesCS7A02G391000.1, TraesCS1B02G356200.1, TraesCS5A02G249900.1, TraesCS1A02G342900.3, TraesCS5A02G467600.1, TraesCS7B02G381200.2, TraesCS7D02G298600.1, Tra…
Neomycin, kanamycin and gentamicin biosynthesis	map00524	2	ec:2.7.1.2 - glucokinase (phosphorylating), ec:2.7.1.1 - hexokinase type IV glucokinase	1, 1	TraesCS3D02G276000.3, TraesCS3D02G276000.3
Selenocompound metabolism	map00450	2	ec:2.1.1.12 - S-methyltransferase, ec:2.1.1.14 - S-methyltransferase	1, 1	TraesCS1D02G011700.2, TraesCS5B02G022800.1
Glycosphingolipid biosynthesis - ganglio series	map00604	2	ec:3.2.1.23 - lactase (ambiguous), ec:3.2.1.52 - hexosaminidase	2, 2	TraesCS4B02G220500.1, TraesCS4D02G220800.1, TraesCS3B02G434500.1, TraesCS3D02G396400.1
Sphingolipid metabolism	map00600	2	ec:3.2.1.23 - lactase (ambiguous), ec:3.2.1.45 - psychosine hydrolase	2, 3	TraesCS4B02G220500.1, TraesCS4D02G220800.1, TraesCS7A02G320000.2, TraesCS7B02G221100.2, TraesCS4A02G226400.1
Aminoacyl-tRNA biosynthesis	map00970	2	ec:6.1.1.7 - ligase, ec:6.1.1.6 - ligase	2, 1	TraesCS4B02G398200.1, TraesCS7D02G199300.3, TraesCS4D02G032900.1
beta-Alanine metabolism	map00410	2	ec:1.4.3.21 - oxidase, ec:4.1.1.15 - decarboxylase	1, 3	TraesCS2D02G335300.1, TraesCS4A02G262600.1, TraesCS4B02G052300.1, TraesCS4D02G052500.1
Alanine, aspartate and glutamate metabolism	map00250	2	ec:6.3.1.2 - synthetase, ec:4.1.1.15 - decarboxylase	3, 3	TraesCS4A02G063800.1, TraesCS4B02G240900.1, TraesCS4D02G240700.1, TraesCS4A02G262600.1, TraesCS4B02G052300.1, TraesCS4D02G052500.1
Fructose and mannose metabolism	map00051	2	ec:2.7.1.11 - phosphohexokinase, ec:2.7.1.1 - hexokinase type IV glucokinase	3, 1	TraesCS5D02G234000.1, TraesCS3A02G107600.1, TraesCS3D02G109600.1, TraesCS3D02G276000.3
Lysine degradation	map00310	2	ec:2.1.1.43 - N-methyltransferase, ec:1.5.1.8 - dehydrogenase (NADP+, L-lysine-forming)	3, 1	TraesCS2A02G382000.6, TraesCS2B02G317900.2, TraesCS1A02G241600.2, TraesCS6A02G344000.2
Sulfur metabolism	map00920	2	ec:2.5.1.47 - synthase, ec:2.8.1.1 - sulfurtransferase	2, 1	TraesCS5D02G027600.1, TraesCS5B02G018700.1, TraesCS5D02G063700.1
Glycerolipid metabolism	map00561	2	ec:2.3.1.20 - O-acyltransferase, ec:2.7.1.29 - kinase	1, 1	TraesCS3A02G013700.1, TraesCS4D02G051400.3
Arachidonic acid metabolism	map00590	2	ec:1.11.1.9 - peroxidase, ec:3.1.1.4 - A2	1, 1	TraesCS6A02G246400.1, TraesCS4A02G087100.1
Drug metabolism - cytochrome P450	map00982	2	ec:1.14.13.8 - monooxygenase, ec:2.5.1.18 - transferase	1, 3	TraesCSU02G087500.2, TraesCS6B02G080000.1, TraesCS1D02G081200.1, TraesCS3B02G334500.1
Ether lipid metabolism	map00565	2	ec:3.1.4.4 - D, ec:3.1.1.4 - A2	1, 1	TraesCS1D02G379900.1, TraesCS4A02G087100.1
Butanoate metabolism	map00650	2	ec:4.1.3.4 - lyase, ec:4.1.1.15 - decarboxylase	1, 3	TraesCS3A02G185500.2, TraesCS4A02G262600.1, TraesCS4B02G052300.1, TraesCS4D02G052500.1
Glycerophospholipid metabolism	map00564	2	ec:3.1.4.4 - D, ec:3.1.1.4 - A2	1, 1	TraesCS1D02G379900.1, TraesCS4A02G087100.1
Carbon fixation pathways in prokaryotes	map00720	2	ec:4.1.1.31 - carboxylase, ec:6.2.1.1 - ligase	2, 1	TraesCS7D02G333900.1, TraesCS7A02G345400.1, TraesCS2A02G290900.2
Steroid biosynthesis	map00100	2	ec:2.5.1.21 - synthase, ec:5.3.3.5 - Delta-isomerase	1, 2	TraesCS5D02G026000.1, TraesCS5B02G029700.1, TraesCS5D02G005800.1
Glycosaminoglycan degradation	map00531	2	ec:3.2.1.23 - lactase (ambiguous), ec:3.2.1.52 - hexosaminidase	2, 2	TraesCS4B02G220500.1, TraesCS4D02G220800.1, TraesCS3B02G434500.1, TraesCS3D02G396400.1
Streptomycin biosynthesis	map00521	2	ec:2.7.1.2 - glucokinase (phosphorylating), ec:2.7.1.1 - hexokinase type IV glucokinase	1, 1	TraesCS3D02G276000.3, TraesCS3D02G276000.3
Tryptophan metabolism	map00380	1	ec:1.11.1.6 - equilase	1	TraesCS6B02G056800.2
Caffeine metabolism	map00232	1	ec:2.3.1.5 - N-acetyltransferase	3	TraesCS2D02G038100.1, TraesCS3B02G592100.1, TraesCS2A02G039500.2
Synthesis and degradation of ketone bodies	map00072	1	ec:4.1.3.4 - lyase	1	TraesCS3A02G185500.2
alpha-Linolenic acid metabolism	map00592	1	ec:3.1.1.4 - A2	1	TraesCS4A02G087100.1
Carotenoid biosynthesis	map00906	1	ec:2.5.1.32 - synthase	1	TraesCS5D02G026000.1
Valine, leucine and isoleucine degradation	map00280	1	ec:4.1.3.4 - lyase	1	TraesCS3A02G185500.2
Nitrotoluene degradation	map00633	1	ec:2.3.1.5 - N-acetyltransferase	3	TraesCS2D02G038100.1, TraesCS3B02G592100.1, TraesCS2A02G039500.2
Metabolism of xenobiotics by cytochrome P450	map00980	1	ec:2.5.1.18 - transferase	3	TraesCS6B02G080000.1, TraesCS1D02G081200.1, TraesCS3B02G334500.1
mTOR signaling pathway	map04150	1	ec:2.7.11.24 - protein kinase	1	TraesCS4B02G197800.1
Tyrosine metabolism	map00350	1	ec:1.4.3.21 - oxidase	1	TraesCS2D02G335300.1
Tropane, piperidine and pyridine alkaloid biosynthesis	map00960	1	ec:1.4.3.21 - oxidase	1	TraesCS2D02G335300.1
Taurine and hypotaurine metabolism	map00430	1	ec:4.1.1.15 - decarboxylase	3	TraesCS4A02G262600.1, TraesCS4B02G052300.1, TraesCS4D02G052500.1
Folate biosynthesis	map00790	1	ec:4.1.3.38 - lyase	1	TraesCS3B02G191100.1
Linoleic acid metabolism	map00591	1	ec:3.1.1.4 - A2	1	TraesCS4A02G087100.1
Th1 and Th2 cell differentiation	map04658	1	ec:3.1.3.16 - phosphatase	3	TraesCS3D02G206300.2, TraesCS3B02G401900.5, TraesCS6B02G398500.1
T cell receptor signaling pathway	map04660	1	ec:3.1.3.16 - phosphatase	3	TraesCS3D02G206300.2, TraesCS3B02G401900.5, TraesCS6B02G398500.1
Glycosphingolipid biosynthesis - globo and isoglobo series	map00603	1	ec:3.2.1.52 - hexosaminidase	2	TraesCS3B02G434500.1, TraesCS3D02G396400.1
Porphyrin and chlorophyll metabolism	map00860	1	ec:6.6.1.1 - chelatase	1	TraesCS5B02G477800.1
Sesquiterpenoid and triterpenoid biosynthesis	map00909	1	ec:2.5.1.21 - synthase	1	TraesCS5D02G026000.1
Isoquinoline alkaloid biosynthesis	map00950	1	ec:1.4.3.21 - oxidase	1	TraesCS2D02G335300.1
Various types of N-glycan biosynthesis	map00513	1	ec:3.2.1.52 - hexosaminidase	2	TraesCS3B02G434500.1, TraesCS3D02G396400.1
Phenylalanine, tyrosine and tryptophan biosynthesis	map00400	1	ec:4.2.1.20 - synthase	1	TraesCS7B02G294800.1
Biosynthesis of terpenoids and steroids	map01062	1	ec:2.5.1.32 - synthase	1	TraesCS5D02G026000.1
Arginine biosynthesis	map00220	1	ec:6.3.1.2 - synthetase	3	TraesCS4A02G063800.1, TraesCS4B02G240900.1, TraesCS4D02G240700.1
Diterpenoid biosynthesis	map00904	1	ec:1.14.11.13 - 2beta-dioxygenase	1	TraesCS3D02G293800.1
Nitrogen metabolism	map00910	1	ec:6.3.1.2 - synthetase	3	TraesCS4A02G063800.1, TraesCS4B02G240900.1, TraesCS4D02G240700.1
Ubiquinone and other terpenoid-quinone biosynthesis	map00130	1	ec:1.6.5.2 - dehydrogenase (quinone)	2	TraesCS2A02G124200.1, TraesCS4B02G205400.1
Riboflavin metabolism	map00740	1	ec:3.1.3.2 - phosphatase	2	TraesCS5A02G182300.1, TraesCS5B02G285400.1
Cutin, suberine and wax biosynthesis	map00073	1	ec:2.3.1.20 - O-acyltransferase	1	TraesCS3A02G013700.1
Geraniol degradation	map00281	1	ec:4.1.3.4 - lyase	1	TraesCS3A02G185500.2
Carbon fixation in photosynthetic organisms	map00710	1	ec:4.1.1.31 - carboxylase	2	TraesCS7D02G333900.1, TraesCS7A02G345400.1
Pentose phosphate pathway	map00030	1	ec:2.7.1.11 - phosphohexokinase	3	TraesCS5D02G234000.1, TraesCS3A02G107600.1, TraesCS3D02G109600.1
Propanoate metabolism	map00640	1	ec:6.2.1.1 - ligase	1	TraesCS2A02G290900.2
Citrate cycle (TCA cycle)	map00020	1	ec:4.1.1.32 - carboxykinase (GTP)	2	TraesCS7D02G333900.1, TraesCS7A02G345400.1

## Sheet: 5 weeks Und vs Dis
UP-REGULATED in 5 weeks Undisturbed
Pathway	Pathway ID	#Enzs in Pathway	Enzyme	#Seqs of Enzyme	Seqs		Legend
Biosynthesis of antibiotics	map01130	25	ec:5.1.3.3 - 1-epimerase, ec:1.1.1.34 - reductase (NADPH), ec:2.7.2.11 - 5-kinase, ec:4.2.1.3 - hydratase, ec:2.7.4.6 - kinase, ec:1.2.4.2 - dehydrogenase (succinyl-transferring), ec:3.5.4.10 - cyclohydrolase, ec:1.2.4.1 - dehydrogenase (acetyl-transferring), ec:2.1.2.3 - formyltransferase, ec:2.5.1.47 - synthase, ec:5.3.1.9 - isomerase, ec:6.4.1.2 - carboxylase, ec:1.1.1.49 - dehydrogenase (NADP…	3, 1, 1, 1, 1, 2, 1, 3, 1, 1, 1, 3, 1, 2, 2, 8, 1, 1, 1, 1, 1, 1, 3, 1, 1	TraesCS2D02G321700.1, TraesCS2D02G321800.1, TraesCS2A02G343900.1, TraesCS5A02G269300.1, TraesCS1B02G290600.2, TraesCS5A02G505000.2, TraesCS1A02G444300.1, TraesCS2D02G076900.1, TraesCS2A02G079500.1, TraesCS3A02G459600.1, TraesCS2A02G010100.1, TraesCS2B02G012500.1, TraesCS2D02G010700.1, TraesCS3A02G459600.1, TraesCS5B02G300800.1, TraesCS5D02G253700.1, TraesCS2B02G082500.1, TraesCS2A02G069400.1, Tra…		Biosynthesis of antibiotics
Starch and sucrose metabolism	map00500	10	ec:3.2.1.48 - alpha-glucosidase, ec:2.4.1.34 - synthase, ec:3.2.1.20 - maltase, ec:3.2.1.4 - endo-1,4-beta-D-glucanase, ec:5.3.1.9 - isomerase, ec:3.1.3.12 - trehalose 6-phosphatase, ec:2.7.1.1 - hexokinase type IV glucokinase, ec:2.4.1.12 - synthase (UDP-forming), ec:3.2.1.26 - invertase, ec:2.4.1.25 - disproportionating enzyme	1, 1, 1, 1, 1, 3, 1, 12, 1, 1	TraesCS7A02G010200.1, TraesCS3D02G246000.1, TraesCS7A02G010200.1, TraesCS2D02G351300.2, TraesCS5D02G253700.1, TraesCS1D02G213700.1, TraesCS2D02G168200.1, TraesCS2A02G161000.1, TraesCS2A02G005200.1, TraesCS7A02G298600.1, TraesCS7B02G188400.2, TraesCS7D02G349200.1, TraesCSU02G003300.1, TraesCS1A02G099100.1, TraesCS2D02G102100.3, TraesCS5B02G517500.1, TraesCS5D02G517200.1, TraesCS1A02G196100.1, Trae…		Carbohydrate metabolism
Glycolysis / Gluconeogenesis	map00010	7	ec:5.1.3.3 - 1-epimerase, ec:1.2.4.1 - dehydrogenase (acetyl-transferring), ec:5.3.1.9 - isomerase, ec:1.8.1.4 - dehydrogenase, ec:2.7.1.40 - kinase, ec:2.7.1.1 - hexokinase type IV glucokinase, ec:4.2.1.11 - hydratase	3, 3, 1, 2, 8, 1, 3	TraesCS2D02G321700.1, TraesCS2D02G321800.1, TraesCS2A02G343900.1, TraesCS2A02G010100.1, TraesCS2B02G012500.1, TraesCS2D02G010700.1, TraesCS5D02G253700.1, TraesCS1D02G107400.2, TraesCS1A02G099500.3, TraesCS3B02G267800.1, TraesCS1A02G213000.1, TraesCS1D02G215900.1, TraesCS3A02G239300.1, TraesCS3A02G239300.2, TraesCS1B02G226500.1, TraesCS3D02G239500.1, TraesCS4B02G021300.1, TraesCS2A02G005200.1, Tra…		Nucleotide metabolism
Pyruvate metabolism	map00620	7	ec:2.3.3.13 - synthase, ec:1.2.4.1 - dehydrogenase (acetyl-transferring), ec:6.4.1.2 - carboxylase, ec:1.1.1.39 - dehydrogenase (decarboxylating), ec:1.8.1.4 - dehydrogenase, ec:2.7.1.40 - kinase, ec:1.1.1.38 - dehydrogenase (oxaloacetate-decarboxylating)	1, 3, 3, 1, 2, 8, 1	TraesCS5D02G139800.1, TraesCS2A02G010100.1, TraesCS2B02G012500.1, TraesCS2D02G010700.1, TraesCS2B02G082500.1, TraesCS2A02G069400.1, TraesCS2D02G068100.1, TraesCS3D02G110700.1, TraesCS1D02G107400.2, TraesCS1A02G099500.3, TraesCS3B02G267800.1, TraesCS1A02G213000.1, TraesCS1D02G215900.1, TraesCS3A02G239300.1, TraesCS3A02G239300.2, TraesCS1B02G226500.1, TraesCS3D02G239500.1, TraesCS4B02G021300.1, Tra…		Amino acid metabolism
Fatty acid biosynthesis	map00061	7	ec:1.14.19.2 - 9-desaturase, ec:2.3.1.86 - synthase, ec:2.3.1.85 - synthase, ec:6.4.1.2 - carboxylase, ec:2.3.1.39 - S-malonyltransferase, ec:2.3.1.41 - synthase I, ec:1.1.1.100 - reductase	2, 1, 8, 3, 3, 2, 3	TraesCS3A02G426800.1, TraesCS3D02G421700.1, TraesCS4B02G269200.1, TraesCS2B02G549400.1, TraesCS2B02G296500.1, TraesCS4A02G114200.1, TraesCS4B02G189900.1, TraesCS4D02G191300.1, TraesCS2D02G521400.1, TraesCS2D02G278000.1, TraesCS2A02G278900.2, TraesCS2B02G082500.1, TraesCS2A02G069400.1, TraesCS2D02G068100.1, TraesCS4A02G114200.1, TraesCS4B02G189900.1, TraesCS4D02G191300.1, TraesCS2B02G549400.1, Tra…		Metabolism of other amino acids
Purine metabolism	map00230	7	ec:3.6.1.15 - phosphatase, ec:2.7.4.6 - kinase, ec:3.5.4.10 - cyclohydrolase, ec:2.1.2.3 - formyltransferase, ec:3.6.1.3 - adenylpyrophosphatase, ec:2.7.1.40 - kinase, ec:2.7.4.3 - kinase	36, 1, 1, 1, 24, 8, 1	TraesCS5A02G205100.1, TraesCS5A02G543300.1, TraesCS4D02G015400.1, TraesCS3B02G290300.1, TraesCS6A02G183200.1, TraesCS6D02G170100.1, TraesCS6D02G246300.1, TraesCS3B02G285600.1, TraesCS2A02G185500.2, TraesCS5B02G203200.1, TraesCS3A02G253700.2, TraesCS1B02G400300.2, TraesCS5D02G211000.1, TraesCS3B02G326200.1, TraesCS1D02G004700.1, TraesCS2A02G304100.1, TraesCS4A02G296600.1, TraesCS5D02G163600.1, Tra…		Lipid metabolism
Amino sugar and nucleotide sugar metabolism	map00520	6	ec:5.1.3.18 - 3,5-epimerase, ec:3.2.1.14 - ChiC, ec:5.3.1.9 - isomerase, ec:3.2.1.52 - hexosaminidase, ec:2.7.1.1 - hexokinase type IV glucokinase, ec:5.3.1.8 - isomerase	1, 3, 1, 3, 1, 1	TraesCS1D02G410200.1, TraesCS6A02G216100.1, TraesCS6B02G246800.1, TraesCS6D02G199500.1, TraesCS5D02G253700.1, TraesCS2A02G185800.1, TraesCS3D02G396400.1, TraesCS2D02G201900.1, TraesCS2A02G005200.1, TraesCS3D02G036100.1		Metabolism of cofactors and vitamins
Galactose metabolism	map00052	5	ec:5.1.3.3 - 1-epimerase, ec:3.2.1.20 - maltase, ec:3.2.1.23 - lactase (ambiguous), ec:2.7.1.1 - hexokinase type IV glucokinase, ec:3.2.1.26 - invertase	3, 1, 2, 1, 1	TraesCS2D02G321700.1, TraesCS2D02G321800.1, TraesCS2A02G343900.1, TraesCS7A02G010200.1, TraesCS3B02G418300.1, TraesCS7D02G359500.1, TraesCS2A02G005200.1, TraesCS7A02G010200.1		Biosynthesis of other secondary metabolites
Aminoacyl-tRNA biosynthesis	map00970	5	ec:6.1.1.7 - ligase, ec:6.1.1.16 - ligase, ec:6.1.1.12 - ligase, ec:6.1.1.21 - ligase, ec:6.1.1.5 - ligase	1, 1, 2, 1, 2	TraesCS4D02G055000.1, TraesCS1A02G145100.1, TraesCS5D02G333800.2, TraesCS5B02G327800.1, TraesCS1D02G101300.1, TraesCS7D02G506300.1, TraesCS7D02G506300.2		Xenobiotics biodegradation and metabolism
Porphyrin and chlorophyll metabolism	map00860	5	ec:4.99.1.1 - ferrochelatase, ec:4.99.1.4 - ferrochelatase, ec:2.4.1.17 - 1-naphthol glucuronyltransferase, ec:1.3.1.76 - dehydrogenase, ec:2.1.1.107 - C-methyltransferase	2, 2, 1, 2, 2	TraesCS3A02G227700.1, TraesCS3D02G225500.1, TraesCS3A02G227700.1, TraesCS3D02G225500.1, TraesCS4A02G098300.1, TraesCS3A02G227700.1, TraesCS3D02G225500.1, TraesCS3A02G227700.1, TraesCS3D02G225500.1		Energy metabolism
Drug metabolism - other enzymes	map00983	4	ec:2.7.4.6 - kinase, ec:3.1.1.1 - ali-esterase, ec:2.4.1.17 - 1-naphthol glucuronyltransferase, ec:2.3.1.5 - N-acetyltransferase	1, 3, 1, 1	TraesCS1A02G444300.1, TraesCS3D02G230200.1, TraesCS7D02G506300.1, TraesCS7D02G506300.2, TraesCS4A02G098300.1, TraesCS6A02G107300.1		Metabolism of terpenoids and polyketides
Nitrogen metabolism	map00910	4	ec:4.2.1.1 - anhydrase, ec:6.3.1.2 - synthetase, ec:1.7.7.1 - reductase, ec:1.4.1.14 - synthase (NADH)	1, 3, 1, 2	TraesCS5D02G290900.1, TraesCS2D02G500600.1, TraesCS2A02G500400.1, TraesCS2B02G528300.2, TraesCS6A02G333900.1, TraesCS3A02G266300.2, TraesCS3D02G266400.1		Glycan biosynthesis and metabolism
Glycerophospholipid metabolism	map00564	4	ec:1.1.1.8 - dehydrogenase (NAD+), ec:3.1.4.4 - D, ec:1.1.1.94 - dehydrogenase [NAD(P)+], ec:3.1.1.32 - A1	3, 2, 3, 1	TraesCS3A02G523900.1, TraesCSU02G054700.2, TraesCS3D02G529400.2, TraesCS7D02G531200.1, TraesCS5B02G200600.2, TraesCS3A02G523900.1, TraesCSU02G054700.2, TraesCS3D02G529400.2, TraesCS3D02G230200.1		Chemical structure transformation maps
Pentose phosphate pathway	map00030	4	ec:5.3.1.9 - isomerase, ec:1.1.1.49 - dehydrogenase (NADP+), ec:2.2.1.2 - dihydroxyacetonetransferase, ec:1.1.1.44 - dehydrogenase (NADP+-dependent, decarboxylating)	1, 1, 1, 1	TraesCS5D02G253700.1, TraesCS2B02G080000.1, TraesCS7B02G202400.1, TraesCS1D02G361400.1		Signal transduction
Other glycan degradation	map00511	4	ec:3.2.1.24 - alpha-D-mannosidase, ec:3.2.1.23 - lactase (ambiguous), ec:3.2.1.52 - hexosaminidase, ec:3.2.1.45 - psychosine hydrolase	4, 2, 3, 1	TraesCS1A02G087500.1, TraesCS1A02G087500.2, TraesCS1D02G088800.1, TraesCS1D02G088800.2, TraesCS3B02G418300.1, TraesCS7D02G359500.1, TraesCS2A02G185800.1, TraesCS3D02G396400.1, TraesCS2D02G201900.1, TraesCS1A02G183900.2		Translation
Citrate cycle (TCA cycle)	map00020	4	ec:4.2.1.3 - hydratase, ec:1.2.4.2 - dehydrogenase (succinyl-transferring), ec:1.2.4.1 - dehydrogenase (acetyl-transferring), ec:1.8.1.4 - dehydrogenase	1, 2, 3, 2	TraesCS5A02G505000.2, TraesCS2D02G076900.1, TraesCS2A02G079500.1, TraesCS2A02G010100.1, TraesCS2B02G012500.1, TraesCS2D02G010700.1, TraesCS1D02G107400.2, TraesCS1A02G099500.3		Immune system
Glyoxylate and dicarboxylate metabolism	map00630	3	ec:4.2.1.3 - hydratase, ec:6.3.1.2 - synthetase, ec:1.11.1.6 - equilase	1, 3, 1	TraesCS5A02G505000.2, TraesCS2D02G500600.1, TraesCS2A02G500400.1, TraesCS2B02G528300.2, TraesCS2D02G333600.1
Valine, leucine and isoleucine degradation	map00280	3	ec:1.2.1.27 - dehydrogenase (CoA-acylating), ec:1.8.1.4 - dehydrogenase, ec:2.3.3.10 - synthase	1, 2, 1	TraesCS2D02G477100.2, TraesCS1D02G107400.2, TraesCS1A02G099500.3, TraesCS4B02G353100.1
Cysteine and methionine metabolism	map00270	3	ec:4.4.1.11 - gamma-lyase, ec:2.5.1.47 - synthase, ec:2.1.1.14 - S-methyltransferase	1, 1, 2	TraesCS1A02G181000.1, TraesCS5B02G300800.1, TraesCS4B02G014700.2, TraesCS4B02G014700.1
Phenylpropanoid biosynthesis	map00940	3	ec:4.3.1.24 - ammonia-lyase, ec:1.11.1.7 - lactoperoxidase, ec:4.3.1.25 - ammonia-lyase	1, 48, 1	TraesCS2D02G377200.1, TraesCS2B02G126300.1, TraesCS3A02G297200.1, TraesCS7D02G369700.1, TraesCS4B02G340200.1, TraesCS7A02G353000.1, TraesCS7A02G474200.1, TraesCS1A02G318400.1, TraesCS7B02G325800.1, TraesCS3B02G209800.1, TraesCS1D02G130200.1, TraesCS7A02G424100.1, TraesCS2D02G108200.1, TraesCS2A02G107800.1, TraesCS6B02G071200.1, TraesCS4B02G340100.1, TraesCS4D02G352200.1, TraesCS1D02G317700.1, Tra…
Thiamine metabolism	map00730	3	ec:3.6.1.15 - phosphatase, ec:3.1.3.2 - phosphatase, ec:2.7.4.3 - kinase	36, 6, 1	TraesCS5A02G205100.1, TraesCS5A02G543300.1, TraesCS4D02G015400.1, TraesCS3B02G290300.1, TraesCS6A02G183200.1, TraesCS6D02G170100.1, TraesCS6D02G246300.1, TraesCS3B02G285600.1, TraesCS2A02G185500.2, TraesCS5B02G203200.1, TraesCS3A02G253700.2, TraesCS1B02G400300.2, TraesCS5D02G211000.1, TraesCS3B02G326200.1, TraesCS1D02G004700.1, TraesCS2A02G304100.1, TraesCS4A02G296600.1, TraesCS5D02G163600.1, Tra…
Ascorbate and aldarate metabolism	map00053	3	ec:5.1.3.18 - 3,5-epimerase, ec:1.13.99.1 - oxygenase, ec:2.4.1.17 - 1-naphthol glucuronyltransferase	1, 3, 1	TraesCS1D02G410200.1, TraesCS7B02G269900.1, TraesCS7A02G357800.1, TraesCS7D02G364900.1, TraesCS4A02G098300.1
Propanoate metabolism	map00640	3	ec:1.2.1.27 - dehydrogenase (CoA-acylating), ec:6.4.1.2 - carboxylase, ec:1.8.1.4 - dehydrogenase	1, 3, 2	TraesCS2D02G477100.2, TraesCS2B02G082500.1, TraesCS2A02G069400.1, TraesCS2D02G068100.1, TraesCS1D02G107400.2, TraesCS1A02G099500.3
Glutathione metabolism	map00480	2	ec:1.1.1.49 - dehydrogenase (NADP+), ec:1.1.1.44 - dehydrogenase (NADP+-dependent, decarboxylating)	1, 1	TraesCS2B02G080000.1, TraesCS1D02G361400.1
Tryptophan metabolism	map00380	2	ec:1.2.4.2 - dehydrogenase (succinyl-transferring), ec:1.11.1.6 - equilase	2, 1	TraesCS2D02G076900.1, TraesCS2A02G079500.1, TraesCS2D02G333600.1
Selenocompound metabolism	map00450	2	ec:4.4.1.11 - gamma-lyase, ec:2.1.1.14 - S-methyltransferase	1, 2	TraesCS1A02G181000.1, TraesCS4B02G014700.2, TraesCS4B02G014700.1
Valine, leucine and isoleucine biosynthesis	map00290	2	ec:2.3.3.13 - synthase, ec:4.2.1.33 - dehydratase	1, 1	TraesCS5D02G139800.1, TraesCS6D02G074300.1
Glycosphingolipid biosynthesis - ganglio series	map00604	2	ec:3.2.1.23 - lactase (ambiguous), ec:3.2.1.52 - hexosaminidase	2, 3	TraesCS3B02G418300.1, TraesCS7D02G359500.1, TraesCS2A02G185800.1, TraesCS3D02G396400.1, TraesCS2D02G201900.1
Phenylalanine metabolism	map00360	2	ec:4.3.1.24 - ammonia-lyase, ec:4.3.1.25 - ammonia-lyase	1, 1	TraesCS2D02G377200.1, TraesCS2D02G377200.1
Sphingolipid metabolism	map00600	2	ec:3.2.1.23 - lactase (ambiguous), ec:3.2.1.45 - psychosine hydrolase	2, 1	TraesCS3B02G418300.1, TraesCS7D02G359500.1, TraesCS1A02G183900.2
Oxidative phosphorylation	map00190	2	ec:3.6.1.1 - diphosphatase, ec:1.9.3.1 - oxidase	1, 1	TraesCS1B02G283300.1, TraesCS4A02G390800.1
Inositol phosphate metabolism	map00562	2	ec:1.13.99.1 - oxygenase, ec:2.7.1.68 - 5-kinase	3, 1	TraesCS7B02G269900.1, TraesCS7A02G357800.1, TraesCS7D02G364900.1, TraesCS4A02G274200.2
Alanine, aspartate and glutamate metabolism	map00250	2	ec:6.3.1.2 - synthetase, ec:1.4.1.14 - synthase (NADH)	3, 2	TraesCS2D02G500600.1, TraesCS2A02G500400.1, TraesCS2B02G528300.2, TraesCS3A02G266300.2, TraesCS3D02G266400.1
Glycosphingolipid biosynthesis - globo and isoglobo series	map00603	2	ec:2.4.1.69 - 1 galactoside alpha-(1,2)-fucosyltransferase, ec:3.2.1.52 - hexosaminidase	1, 3	TraesCS6D02G300000.1, TraesCS2A02G185800.1, TraesCS3D02G396400.1, TraesCS2D02G201900.1
Fructose and mannose metabolism	map00051	2	ec:2.7.1.1 - hexokinase type IV glucokinase, ec:5.3.1.8 - isomerase	1, 1	TraesCS2A02G005200.1, TraesCS3D02G036100.1
Arginine and proline metabolism	map00330	2	ec:2.7.2.11 - 5-kinase, ec:1.2.1.41 - dehydrogenase	1, 1	TraesCS1B02G290600.2, TraesCS1B02G290600.2
Biotin metabolism	map00780	2	ec:2.3.1.41 - synthase I, ec:1.1.1.100 - reductase	2, 3	TraesCS2B02G549400.1, TraesCS2D02G521400.1, TraesCS2A02G278900.2, TraesCS2D02G278000.1, TraesCS2B02G296500.1
Pentose and glucuronate interconversions	map00040	2	ec:3.2.1.15 - pectin depolymerase, ec:2.4.1.17 - 1-naphthol glucuronyltransferase	2, 1	TraesCS3D02G021700.1, TraesCS3B02G020300.1, TraesCS4A02G098300.1
Terpenoid backbone biosynthesis	map00900	2	ec:1.1.1.34 - reductase (NADPH), ec:2.3.3.10 - synthase	1, 1	TraesCS5A02G269300.1, TraesCS4B02G353100.1
Carbon fixation pathways in prokaryotes	map00720	2	ec:4.2.1.3 - hydratase, ec:6.4.1.2 - carboxylase	1, 3	TraesCS5A02G505000.2, TraesCS2B02G082500.1, TraesCS2A02G069400.1, TraesCS2D02G068100.1
Glycosaminoglycan degradation	map00531	2	ec:3.2.1.23 - lactase (ambiguous), ec:3.2.1.52 - hexosaminidase	2, 3	TraesCS3B02G418300.1, TraesCS7D02G359500.1, TraesCS2A02G185800.1, TraesCS3D02G396400.1, TraesCS2D02G201900.1
Carbapenem biosynthesis	map00332	2	ec:2.7.2.11 - 5-kinase, ec:1.2.1.41 - dehydrogenase	1, 1	TraesCS1B02G290600.2, TraesCS1B02G290600.2
Cyanoamino acid metabolism	map00460	1	ec:4.4.1.9 - synthase	1	TraesCS5B02G300800.1
Caffeine metabolism	map00232	1	ec:2.3.1.5 - N-acetyltransferase	1	TraesCS6A02G107300.1
Neomycin, kanamycin and gentamicin biosynthesis	map00524	1	ec:2.7.1.1 - hexokinase type IV glucokinase	1	TraesCS2A02G005200.1
Synthesis and degradation of ketone bodies	map00072	1	ec:2.3.3.10 - synthase	1	TraesCS4B02G353100.1
alpha-Linolenic acid metabolism	map00592	1	ec:3.1.1.32 - A1	1	TraesCS3D02G230200.1
Lipoic acid metabolism	map00785	1	ec:2.8.1.8 - synthase	2	TraesCS1B02G343800.1, TraesCS1A02G330200.1
Nitrotoluene degradation	map00633	1	ec:2.3.1.5 - N-acetyltransferase	1	TraesCS6A02G107300.1
Biosynthesis of unsaturated fatty acids	map01040	1	ec:1.14.19.2 - 9-desaturase	2	TraesCS3A02G426800.1, TraesCS3D02G421700.1
Metabolism of xenobiotics by cytochrome P450	map00980	1	ec:2.4.1.17 - 1-naphthol glucuronyltransferase	1	TraesCS4A02G098300.1
Phosphatidylinositol signaling system	map04070	1	ec:2.7.1.68 - 5-kinase	1	TraesCS4A02G274200.2
Glycine, serine and threonine metabolism	map00260	1	ec:1.8.1.4 - dehydrogenase	2	TraesCS1D02G107400.2, TraesCS1A02G099500.3
Th1 and Th2 cell differentiation	map04658	1	ec:3.1.3.16 - phosphatase	2	TraesCS7A02G143200.1, TraesCS2B02G309400.2
T cell receptor signaling pathway	map04660	1	ec:3.1.3.16 - phosphatase	2	TraesCS7A02G143200.1, TraesCS2B02G309400.2
Pyrimidine metabolism	map00240	1	ec:2.7.4.6 - kinase	1	TraesCS1A02G444300.1
Aflatoxin biosynthesis	map00254	1	ec:6.4.1.2 - carboxylase	3	TraesCS2B02G082500.1, TraesCS2A02G069400.1, TraesCS2D02G068100.1
Indole alkaloid biosynthesis	map00901	1	ec:4.3.3.2 - synthase	1	TraesCS2A02G170200.2
Lysine degradation	map00310	1	ec:1.2.4.2 - dehydrogenase (succinyl-transferring)	2	TraesCS2D02G076900.1, TraesCS2A02G079500.1
Various types of N-glycan biosynthesis	map00513	1	ec:3.2.1.52 - hexosaminidase	3	TraesCS2A02G185800.1, TraesCS3D02G396400.1, TraesCS2D02G201900.1
Sulfur metabolism	map00920	1	ec:2.5.1.47 - synthase	1	TraesCS5B02G300800.1
Steroid hormone biosynthesis	map00140	1	ec:2.4.1.17 - 1-naphthol glucuronyltransferase	1	TraesCS4A02G098300.1
Glycerolipid metabolism	map00561	1	ec:2.7.1.30 - kinase	3	TraesCS2D02G517200.1, TraesCS2B02G544200.1, TraesCS2A02G515700.1
Arginine biosynthesis	map00220	1	ec:6.3.1.2 - synthetase	3	TraesCS2D02G500600.1, TraesCS2A02G500400.1, TraesCS2B02G528300.2
Drug metabolism - cytochrome P450	map00982	1	ec:2.4.1.17 - 1-naphthol glucuronyltransferase	1	TraesCS4A02G098300.1
Retinol metabolism	map00830	1	ec:2.4.1.17 - 1-naphthol glucuronyltransferase	1	TraesCS4A02G098300.1
Methane metabolism	map00680	1	ec:4.2.1.11 - hydratase	3	TraesCS5A02G188100.1, TraesCS5D02G202900.1, TraesCS5B02G195500.1
Ether lipid metabolism	map00565	1	ec:3.1.4.4 - D	2	TraesCS7D02G531200.1, TraesCS5B02G200600.2
One carbon pool by folate	map00670	1	ec:2.1.2.3 - formyltransferase	1	TraesCS3A02G459600.1
Ubiquinone and other terpenoid-quinone biosynthesis	map00130	1	ec:1.6.5.2 - dehydrogenase (quinone)	1	TraesCS2A02G259200.1
Butanoate metabolism	map00650	1	ec:2.3.3.10 - synthase	1	TraesCS4B02G353100.1
Riboflavin metabolism	map00740	1	ec:3.1.3.2 - phosphatase	6	TraesCS4B02G247300.1, TraesCS4B02G364000.1, TraesCS5A02G129100.1, TraesCS4B02G348600.1, TraesCS4D02G357200.1, TraesCS5D02G090100.4
Carbon fixation in photosynthetic organisms	map00710	1	ec:1.1.1.39 - dehydrogenase (decarboxylating)	1	TraesCS3D02G110700.1
Streptomycin biosynthesis	map00521	1	ec:2.7.1.1 - hexokinase type IV glucokinase	1	TraesCS2A02G005200.1
Glycosphingolipid biosynthesis - lacto and neolacto series	map00601	1	ec:2.4.1.69 - 1 galactoside alpha-(1,2)-fucosyltransferase	1	TraesCS6D02G300000.1
UP-REGULATED in 5 weeks Disturbed
Pathway	Pathway ID	#Enzs in Pathway	Enzyme	#Seqs of Enzyme	Seqs
Biosynthesis of antibiotics	map01130	12	ec:2.7.2.3 - kinase, ec:2.7.4.6 - kinase, ec:5.3.3.2 - Delta-isomerase, ec:2.7.7.4 - adenylyltransferase, ec:2.5.1.29 - diphosphate synthase, ec:2.5.1.21 - synthase, ec:3.5.4.6 - deaminase, ec:4.1.2.13 - aldolase, ec:5.4.99.5 - mutase, ec:2.7.1.11 - phosphohexokinase, ec:3.1.1.31 - phosphogluconolactonase, ec:1.11.1.6 - equilase	1, 1, 1, 1, 1, 1, 1, 1, 1, 1, 1, 1	TraesCS7D02G460700.1, TraesCS4D02G099200.1, TraesCS1B02G269500.1, TraesCS5A02G382900.1, TraesCS5D02G365100.1, TraesCS5D02G365100.1, TraesCS2A02G087000.2, TraesCS7B02G283000.1, TraesCS6D02G136700.1, TraesCS5A02G226600.1, TraesCS2D02G182700.1, TraesCS6A02G041700.1
Purine metabolism	map00230	6	ec:3.6.1.15 - phosphatase, ec:2.7.4.6 - kinase, ec:2.7.7.4 - adenylyltransferase, ec:2.4.2.7 - phosphoribosyltransferase, ec:3.5.4.6 - deaminase, ec:3.6.1.3 - adenylpyrophosphatase	6, 1, 1, 1, 1, 2	TraesCS1A02G438600.1, TraesCS7A02G336600.2, TraesCS7B02G181800.2, TraesCS1A02G132600.4, TraesCS7D02G000100.3, TraesCS1A02G350200.3, TraesCS4D02G099200.1, TraesCS5A02G382900.1, TraesCS2A02G358100.1, TraesCS2A02G087000.2, TraesCS1A02G132600.4, TraesCS7B02G181800.2
Starch and sucrose metabolism	map00500	5	ec:2.4.1.15 - synthase (UDP-forming), ec:2.4.1.34 - synthase, ec:2.4.1.14 - synthase, ec:2.4.1.13 - synthase, ec:2.4.1.12 - synthase (UDP-forming)	1, 2, 1, 2, 2	TraesCS1D02G341100.1, TraesCS5A02G490800.1, TraesCS6A02G154400.1, TraesCS4D02G088200.2, TraesCS2A02G168200.1, TraesCS4A02G140000.1, TraesCS2B02G119700.3, TraesCS5D02G470400.2
Drug metabolism - other enzymes	map00983	5	ec:2.7.4.6 - kinase, ec:2.7.4.14 - kinase, ec:3.1.1.1 - ali-esterase, ec:2.5.1.18 - transferase, ec:2.3.1.5 - N-acetyltransferase	1, 1, 1, 1, 1	TraesCS4D02G099200.1, TraesCS3B02G155300.1, TraesCS2D02G182700.1, TraesCS3B02G152200.1, TraesCS2A02G323000.1
Glycolysis / Gluconeogenesis	map00010	4	ec:2.7.2.3 - kinase, ec:4.1.2.13 - aldolase, ec:1.2.1.9 - dehydrogenase (NADP+), ec:2.7.1.11 - phosphohexokinase	1, 1, 1, 1	TraesCS7D02G460700.1, TraesCS7B02G283000.1, TraesCS2D02G197300.1, TraesCS5A02G226600.1
Phosphatidylinositol signaling system	map04070	4	ec:2.7.4.24 - kinase, ec:2.7.1.159 - 5/6-kinase, ec:2.7.1.68 - 5-kinase, ec:2.7.4.21 - kinase	1, 3, 2, 1	TraesCS3B02G347000.1, TraesCS4A02G059500.1, TraesCS4A02G059500.3, TraesCS4D02G236500.3, TraesCS4A02G274200.1, TraesCS4D02G036500.4, TraesCS3B02G347000.1
Pentose phosphate pathway	map00030	4	ec:4.1.2.13 - aldolase, ec:1.2.1.9 - dehydrogenase (NADP+), ec:2.7.1.11 - phosphohexokinase, ec:3.1.1.31 - phosphogluconolactonase	1, 1, 1, 1	TraesCS7B02G283000.1, TraesCS2D02G197300.1, TraesCS5A02G226600.1, TraesCS2D02G182700.1
Glutathione metabolism	map00480	3	ec:6.3.2.3 - synthase, ec:1.11.1.9 - peroxidase, ec:2.5.1.18 - transferase	1, 1, 1	TraesCS7A02G442500.1, TraesCS6B02G278100.1, TraesCS3B02G152200.1
Inositol phosphate metabolism	map00562	3	ec:2.7.1.159 - 5/6-kinase, ec:2.7.1.68 - 5-kinase, ec:2.7.1.134 - 1-kinase	3, 2, 3	TraesCS4A02G059500.1, TraesCS4A02G059500.3, TraesCS4D02G236500.3, TraesCS4A02G274200.1, TraesCS4D02G036500.4, TraesCS4A02G059500.1, TraesCS4A02G059500.3, TraesCS4D02G236500.3
Carbon fixation in photosynthetic organisms	map00710	3	ec:2.7.2.3 - kinase, ec:4.1.2.13 - aldolase, ec:1.1.1.39 - dehydrogenase (decarboxylating)	1, 1, 1	TraesCS7D02G460700.1, TraesCS7B02G283000.1, TraesCS3D02G275500.1
Glyoxylate and dicarboxylate metabolism	map00630	2	ec:6.3.1.2 - synthetase, ec:1.11.1.6 - equilase	1, 1	TraesCS1B02G158600.1, TraesCS6A02G041700.1
Pyruvate metabolism	map00620	2	ec:1.1.1.39 - dehydrogenase (decarboxylating), ec:1.1.1.38 - dehydrogenase (oxaloacetate-decarboxylating)	1, 1	TraesCS3D02G275500.1, TraesCS3D02G275500.1
Galactose metabolism	map00052	2	ec:3.2.1.23 - lactase (ambiguous), ec:2.7.1.11 - phosphohexokinase	1, 1	TraesCS3A02G386100.3, TraesCS5A02G226600.1
Drug metabolism - cytochrome P450	map00982	2	ec:1.14.13.8 - monooxygenase, ec:2.5.1.18 - transferase	2, 1	TraesCS5A02G348400.1, TraesCS7A02G552000.1, TraesCS3B02G152200.1
Methane metabolism	map00680	2	ec:4.1.2.13 - aldolase, ec:2.7.1.11 - phosphohexokinase	1, 1	TraesCS7B02G283000.1, TraesCS5A02G226600.1
Aminoacyl-tRNA biosynthesis	map00970	2	ec:6.1.1.7 - ligase, ec:6.1.1.6 - ligase	1, 1	TraesCS3A02G024100.1, TraesCS4D02G032900.5
Terpenoid backbone biosynthesis	map00900	2	ec:5.3.3.2 - Delta-isomerase, ec:2.5.1.29 - diphosphate synthase	1, 1	TraesCS1B02G269500.1, TraesCS5D02G365100.1
Thiamine metabolism	map00730	2	ec:3.6.1.15 - phosphatase, ec:2.7.6.2 - diphosphokinase	6, 1	TraesCS1A02G438600.1, TraesCS7A02G336600.2, TraesCS7B02G181800.2, TraesCS1A02G132600.4, TraesCS7D02G000100.3, TraesCS1A02G350200.3, TraesCS2D02G106300.1
Alanine, aspartate and glutamate metabolism	map00250	2	ec:6.3.1.2 - synthetase, ec:4.1.1.15 - decarboxylase	1, 1	TraesCS1B02G158600.1, TraesCS3B02G022900.1
Porphyrin and chlorophyll metabolism	map00860	2	ec:1.14.13.122 - oxygenase, ec:1.16.3.1 - ceruloplasmin	1, 1	TraesCS5D02G466600.1, TraesCS4B02G137200.1
Pyrimidine metabolism	map00240	2	ec:2.7.4.6 - kinase, ec:2.7.4.14 - kinase	1, 1	TraesCS4D02G099200.1, TraesCS3B02G155300.1
Fructose and mannose metabolism	map00051	2	ec:4.1.2.13 - aldolase, ec:2.7.1.11 - phosphohexokinase	1, 1	TraesCS7B02G283000.1, TraesCS5A02G226600.1
Phenylpropanoid biosynthesis	map00940	1	ec:1.11.1.7 - lactoperoxidase	5	TraesCS3A02G249200.1, TraesCS7A02G428400.1, TraesCS7D02G420800.1, TraesCS6A02G041700.1, TraesCS6B02G278100.1
Tryptophan metabolism	map00380	1	ec:1.11.1.6 - equilase	1	TraesCS6A02G041700.1
Phenylalanine, tyrosine and tryptophan biosynthesis	map00400	1	ec:5.4.99.5 - mutase	1	TraesCS6D02G136700.1
Sulfur metabolism	map00920	1	ec:2.7.7.4 - adenylyltransferase	1	TraesCS5A02G382900.1
Caffeine metabolism	map00232	1	ec:2.3.1.5 - N-acetyltransferase	1	TraesCS2A02G323000.1
Selenocompound metabolism	map00450	1	ec:2.7.7.4 - adenylyltransferase	1	TraesCS5A02G382900.1
Monobactam biosynthesis	map00261	1	ec:2.7.7.4 - adenylyltransferase	1	TraesCS5A02G382900.1
Steroid degradation	map00984	1	ec:1.3.99.5 - 4-dehydrogenase (acceptor)	1	TraesCS2B02G415600.1
Glycerolipid metabolism	map00561	1	ec:2.3.1.20 - O-acyltransferase	1	TraesCS3B02G011800.1
Glycosphingolipid biosynthesis - ganglio series	map00604	1	ec:3.2.1.23 - lactase (ambiguous)	1	TraesCS3A02G386100.3
Arginine biosynthesis	map00220	1	ec:6.3.1.2 - synthetase	1	TraesCS1B02G158600.1
Arachidonic acid metabolism	map00590	1	ec:1.11.1.9 - peroxidase	1	TraesCS6B02G278100.1
Nitrotoluene degradation	map00633	1	ec:2.3.1.5 - N-acetyltransferase	1	TraesCS2A02G323000.1
Amino sugar and nucleotide sugar metabolism	map00520	1	ec:2.4.1.43 - 4-alpha-galacturonosyltransferase	1	TraesCS6A02G307100.1
N-Glycan biosynthesis	map00510	1	ec:2.4.1.256 - alpha-1,2-glucosyltransferase	1	TraesCS2D02G356700.1
Metabolism of xenobiotics by cytochrome P450	map00980	1	ec:2.5.1.18 - transferase	1	TraesCS3B02G152200.1
Nitrogen metabolism	map00910	1	ec:6.3.1.2 - synthetase	1	TraesCS1B02G158600.1
Sphingolipid metabolism	map00600	1	ec:3.2.1.23 - lactase (ambiguous)	1	TraesCS3A02G386100.3
Ubiquinone and other terpenoid-quinone biosynthesis	map00130	1	ec:1.6.5.2 - dehydrogenase (quinone)	3	TraesCS3A02G323800.1, TraesCS3B02G353000.1, TraesCS3D02G317400.1
Butanoate metabolism	map00650	1	ec:4.1.1.15 - decarboxylase	1	TraesCS3B02G022900.1
Taurine and hypotaurine metabolism	map00430	1	ec:4.1.1.15 - decarboxylase	1	TraesCS3B02G022900.1
Glycerophospholipid metabolism	map00564	1	ec:2.1.1.103 - N-methyltransferase	1	TraesCS1D02G375600.1
Cutin, suberine and wax biosynthesis	map00073	1	ec:2.3.1.20 - O-acyltransferase	1	TraesCS3B02G011800.1
Cysteine and methionine metabolism	map00270	1	ec:6.3.2.3 - synthase	1	TraesCS7A02G442500.1
beta-Alanine metabolism	map00410	1	ec:4.1.1.15 - decarboxylase	1	TraesCS3B02G022900.1
Steroid biosynthesis	map00100	1	ec:2.5.1.21 - synthase	1	TraesCS5D02G365100.1
Glycosaminoglycan degradation	map00531	1	ec:3.2.1.23 - lactase (ambiguous)	1	TraesCS3A02G386100.3
Other glycan degradation	map00511	1	ec:3.2.1.23 - lactase (ambiguous)	1	TraesCS3A02G386100.3
Sesquiterpenoid and triterpenoid biosynthesis	map00909	1	ec:2.5.1.21 - synthase	1	TraesCS5D02G365100.1

## Sheet: R. irregulare
lightyellow module (related to L. rigidum)
Pathway	Pathway ID	#Enzs in Pathway	Enzyme	#Seqs of Enzyme	Seqs			Legend
Biosynthesis of antibiotics	map01130	3	ec:4.3.2.2 - lyase, ec:1.4.1.14 - synthase (NADH), ec:2.7.1.11 - phosphohexokinase	1, 1, 1	1529571, 1734856, 1618749			Biosynthesis of antibiotics
Aminoacyl-tRNA biosynthesis	map00970	2	ec:6.1.1.17 - ligase, ec:2.1.2.9 - formyltransferase	1, 1	1451450, 1612931			Carbohydrate metabolism
Purine metabolism	map00230	2	ec:4.3.2.2 - lyase, ec:3.6.1.15 - phosphatase	1, 1	1529571, 1651869			Nucleotide metabolism
Alanine, aspartate and glutamate metabolism	map00250	2	ec:4.3.2.2 - lyase, ec:1.4.1.14 - synthase (NADH)	1, 1	1529571, 1734856			Amino acid metabolism
One carbon pool by folate	map00670	1	ec:2.1.2.9 - formyltransferase	1	1612931			Lipid metabolism
Nitrogen metabolism	map00910	1	ec:1.4.1.14 - synthase (NADH)	1	1734856			Metabolism of cofactors and vitamins
Glycolysis / Gluconeogenesis	map00010	1	ec:2.7.1.11 - phosphohexokinase	1	1618749			Energy metabolism
Lysine degradation	map00310	1	ec:2.1.1.43 - N-methyltransferase	1	1681311			Translation
Riboflavin metabolism	map00740	1	ec:2.7.1.26 - kinase	1	1495548			Signal transduction
Thiamine metabolism	map00730	1	ec:3.6.1.15 - phosphatase	1	1651869
Cysteine and methionine metabolism	map00270	1	ec:4.1.1.50 - decarboxylase	1	1596757
Galactose metabolism	map00052	1	ec:2.7.1.11 - phosphohexokinase	1	1618749
Pentose phosphate pathway	map00030	1	ec:2.7.1.11 - phosphohexokinase	1	1618749
Methane metabolism	map00680	1	ec:2.7.1.11 - phosphohexokinase	1	1618749
Porphyrin and chlorophyll metabolism	map00860	1	ec:6.1.1.17 - ligase	1	1451450
Fructose and mannose metabolism	map00051	1	ec:2.7.1.11 - phosphohexokinase	1	1618749
Biosynthesis of unsaturated fatty acids	map01040	1	ec:1.14.19.1 - 9-desaturase	1	1538150
Arginine and proline metabolism	map00330	1	ec:4.1.1.50 - decarboxylase	1	1596757
orange module (related to O. compressus)
Pathway	Pathway ID	#Enzs in Pathway	Enzyme	#Seqs of Enzyme	Seqs
Nicotinate and nicotinamide metabolism	map00760	1	ec:2.7.1.23 - kinase	1	1731956
Glycerolipid metabolism	map00561	1	ec:2.7.1.107 - kinase (ATP)	1	1731956
Oxidative phosphorylation	map00190	1	ec:1.9.3.1 - oxidase	1	1740251
Glycerophospholipid metabolism	map00564	1	ec:2.7.1.107 - kinase (ATP)	1	1731956
Phosphatidylinositol signaling system	map04070	1	ec:2.7.1.107 - kinase (ATP)	1	1731956
