# Supplementary material for: Transcriptome Analysis of Wheat Roots Reveals a Differential Regulation of Stress Responses Related to Arbuscular Mycorrhizal Fungi and Soil Disturbance
Source: Biology (Basel). 2019 Dec 11;8(4):93. doi: 10.3390/biology8040093 (PMC6956056; doi:10.3390/biology8040093)
Supplement: Supplementary file 1 [file biology-08-00093-s001.zip › Table S7.xlsx]

## Sheet: Folha1
Table S6. Rhizoglomus irregulare genes in the "lightyellow" and "orange" modules.
lightyellow (related to L. rigidum)
Accession	GO	Gene	Pfam domain
1461428	oxidoreductase activity/oxidation reduction process	2OG-Fe(II) oxygenase superfamily	2OG-Fe(II) oxygenase superfamily
1618749	6-phosphofructokinase activity	6-phosphofructokinase	Phosphofructokinase
1641508	ATP binding	Peroxisome assembly factor 2 containing the AAA+-type ATPase domain	ATPase family associated with various cellular activities (AAA)
1529571	catalytic activity/purine ribonucleotide biosynthetic process/N6-(1,2-dicarboxyethyl)AMP AMP-lyase (fumarate-forming) activity	Adenylosuccinate lyase	Adenylosuccinate lyase C-terminus, Lyase
1789705	NA	Arrestin (or S-antigen), N-terminal domain	Arrestin (or S-antigen), N-terminal domain
1474604	protein binding	Proteins containing BTB/POZ and Kelch domains, involved in regulatory/signal transduction processes	BTB/POZ domain, BTB And C-terminal Kelch
1785978	protein binding	BTP/POZ domain	BTB/POZ domain, BTB And C-terminal Kelch, TLD
1504245	binding	Protein involved in cell differentiation/sexual development	Cell differentiation family, Rcd1-like
1785122	chromosome, centromeric region	centromere protein P	CENP-A-nucleosome distal (CAD) centromere subunit, CENP-P
1632623	ATP binding; protein kinase activity	checkpoint kinase and related serine/threonine protein kinases	Protein kinase domain
1756336	iron ion binding/oxireductase activity/heme binding	cytochrome P450 CYP11/CYP12/CYP24/CYP27 family	Cytochrome P450
1638705	iron ion binding/ocxireductase activity/heme binding	cytochrome P450 CYP2 family	Cytochrome P450
1767856	oxireductase activity/oxidation reduction process	D-aspartate oxidase	FAD dependent oxidoreductase
1582414	metabolic process; oxidoreductase activity	Di-copper centre-containing protein	Hemocyanin, copper containing domain, Hemocyanin, ig-like domain
1521720	NA	DUF544 domain protein containing protein	MINDY deubiquitinase
1641533	nucleic acid binding; protein binding	Translation initiation factor 2C (eIF-2C) and related proteins	Piwi domain, PAZ domain
1618133	protein binding	F box like	F-box-like
346538	protein binding	F box like	F-box-like
1476465	protein binding	F-box domain
1449605	predicted RNA binding protein	fibronectin RNA binding protein	NFACT protein RNA binding domain, NFACT protein C-terminal domain
1460712	NA	Polyadenylation factor I complex, subunit FIP1, Fip1-domain containing protein	Fip1 motif
1558640	DNA binding; nucleus; transcription, DNA-templated; zinc ion binding	fungal specific transcription factor domain	Fungal specific transcription factor domain
1734856	glutamate biosynthetic process; oxidoreductase activity; iron ion binding; nitrogen compound metabolic process	glutamate synthase	Pyridine nucleotide-disulphide oxidoreductase, Glutamate synthase central domain, Dihydroprymidine dehydrogenase domain II, 4Fe-4S cluster, Glutamine amidotransferases class-II, GXGXG motif, Conserved region in glutamate synthase
1485065	NA	Hsp70 family protein
747299	cellular response to DNA damage stimulus/mitotic cell checkpoint	Integrator complex subunit 3
1616574	metalloendopeptidase activity; membrane	Intramembrane metalloprotease (sterol-regulatory element-binding protein (SREBP) protease)	Peptidase family M50
1556586	component of membrane	Predicted endoplasmic reticulum membrane protein Lec35/MPDU1 involved in monosaccharide-P-dolichol utilization	PQ loop repeat
1445951	NA	MD 2 related lipid recognition domin containing protein	ML domain
1658451	integral component of membrane/transmembrane transport	membrane transport protein	Membrane transport protein
1612931	methionyl-tRNA formyltransferase activity/biosynthetic process	methionyl-tRNA formyltransferase	Formyl transferase
1520940	mitochodrial transport/mitochodrial membrane	Mitochondrial oxoglutarate/malate carrier proteins	Mitochondrial carrier protein
1876310	NA	NA
1861646	NA	NA
1787466	NA	NA
1769842	NA	NA
1728707	NA	NA
1717975	NA	NA
1693676	NA	NA
1595273	NA	NA
1582460	NA	NA
1572597	NA	NA
1529190	NA	NA
1479710	NA	NA
163414	NA	NA
18313	NA	NA
1543720	NA	NAD(P) binding protein	NmrA-like family
1726350	mitochondrion; electron transport chain	NADH ubiquinone oxireductase B12 family	NADH-ubiquinone oxidoreductase B12 subunit family
1699942	binding	Neurochondrin/leucine-rich protein	Neurochondrin
1563369	zinc ion binding	Nuclear pore complex rNpl4 component	NPL4 family, putative zinc binding region, Nuclear pore localisation protein NPL4
1529551	NA	Nuclear RNA-splicing-associated protein	Nuclear RNA-splicing-associated protein
1458475	mRNA binding; meiotic cell cycle	nuclear segregation protein bfr1
1736250	NA	peptidase inhibitor I9	Peptidase inhibitor I9
1789260	serine-type peptidase activity; proteolysis	peptidase s41 family protein	Peptidase family S41
1703386	methyltransferase activity;	predicted N6-adenine methylase involved in transcrition regulation	MT-A70
1644480	metabolic process; hydrolase activity	putative amidohydrolase	Peptidase dimerisation domain, Peptidase family M20/M25/M40
1536708	phosphoric ester hydrolase activity	putative phosphoinositide phosphatase	SacI homology domain
1681311	protein binding/nucleus/histone lysine methyltransferase activity	Putative transcription factor ASH1/LIN-59	SET domain
1510736	integral component of membrane	Golgi proteins involved in ER retention , RER1-like protein	Rer1 family
816160	protein binding; zinc ion binding	Ring finger domain	Ring finger domain
1497217	DNA binding/DNA directed RNA polymerase activity/transcription DNA templated	RNA polymerase 25kDa subunit	RNA polymerase Rpb5, C-terminal domain, RNA polymerase Rpb5, N-terminal domain
1705510	NA	S-adenosyl L methionine dependent methyltransferase	Methyltransferase domain
1787132	ATP binding; protein kinase activity	serine threonine protein kinase	Protein tyrosine kinase
1687269	NA	serine threonine protein kinase	Protein kinase domain
1785138	electron carrier activity/ oxireductase activity/ cell redox homeostasis	SH3 binding glutamic acid rich protein	SH3-binding, glutamic acid-rich protein
1482121	protein binding	SH3 domain	SH3 domain
1462664	membrane	Prohibitins and stomatins of the PID superfamily, SPFH domain	SPFH domain / Band 7 family
1449652	protein binding/ATP binding/chromosome	Structural maintenance of chromosome protein 1	RecF/RecN/SMC N terminal domain, SMC proteins Flexible Hinge Domain
1765105	serine-type endopeptidase activity/proteolysis	Subsitilin-related protease/vacuolar protease B	Subtilase family, Peptidase inhibitor I9
1642413	response to oxidative stress	Svf1-like N terminal lipocain domain	Svf1-like N-terminal lipocalin domain
1541314	calcium ion binding/protein binding	Synaptic vesicle protein EHS-1 and related EH domain proteins	UBA/TS-N domain, Cytoskeletal-regulatory complex EF hand
3634	NA	Targeting protein for xkpl2 homolog	Targeting protein for Xklp2 (TPX2)
1670779	protein binding	Ubiquitin family	Ubiquitin family
1661978	ion channel activity/ion transport/membrane transport	Voltage-gated K+ channel KCNB/KCNC	Ion transport protein
1520061	oxireductase activity/oxidation reduction process	Voltage-gated shaker-like K+ channel	Aldo/keto reductase family
1542160	GTPase activator activity	Ypt/Rab GTPase activating protein	Rab-GTPase-TBC domain
1529482	GTPase activator activity	Ypt/Rab GTPase activating protein GYP6	Rab-GTPase-TBC domain
852900	nucleic acid binding; positive regulation of transcription	zinc coordinating transcription factor sfp1
1771731	protein binding/zinc ion binding	Zinc finger, RING type
orange (related to O. compressus)
Accession	GO	Gene	Pfam domain
1680088	nucleic acid binding/exonuclease activity	3'-5' exonuclease	Exonuclease
1776101	fatty acid metabolic process	acyl-CoA oxidase
1846999	GTP binding/proteolysis/peptidase activity	AIG1 family	AIG1 family, Hint module
1871433	oxireductase activity	Alkyl hydroperoxide reductase	AhpC/TSA family
1518252	ATP binding	ATPase aaa
1727319	nucleotide binding/Mg ion transport/component membrane/ metal ion binding	Ca2+ transporting ATPase	Cation transporting ATPase, C-terminus, haloacid dehalogenase-like hydrolase, E1-E2 ATPase, Cation transporter/ATPase, N-terminus
519291	NA	camk/camkl protein kinase
1667545	cation transport/integral component of membrane	Cation efflux family; Co/Zn/Cd cation transporter-like	Cation efflux family
1712923	NA	crinkler family protein
1467874	NA	CSL zinc finger domain-containing protein	CSL zinc finger
1740251	DNA binding/cytochrome C oxidase activity/iron binding activity/electron carrier activity/heme binding/aerobic respiration	Cytochrome C oxidase	LAGLIDADG endonuclease, Cytochrome C and Quinol oxidase polypeptide I
1855991	iron ion binding/oxireductase activity/heme binding	Cytochrome P450 CYP4/CYP19/CYP26	Cytochrome P450
1702159	iron ion binding/oxireductase activity/heme binding	Cytochrome P450 CYP4/CYP19/CYP26	Cytochrome P450
1624068	mitotic nuclear division	DASH complex subunit	DASH complex subunit Duo1
1690771	NA	DUF185-domain-containing protein	Putative S-adenosyl-L-methionine-dependent methyltransferase
1544531	protein binding/zinc ion binding	E3 ubiquitin ligase
1532773	protein binding/zinc ion binding	E3 ubiquitin ligase	WD-repeat region, FANCL C-terminal domain
1876235	protein binding	F box domain	F-box domain
1437115	protein binding	FHA domain	FHA domain
1618419	transferase activity/protein glycosylation	glycosyltransferase family 31 protein
1770795	protein binding	GYF domain protein	GYF domain
1514669	NA	GYF domain protein
1778383	NA	His-Me finger endonuclease	HNH endonuclease
1778451	intracellular/sequence specific DNA binding/protein heterodimerization activity	histone like transcription factor	Histone-like transcription factor (CBF/NF-Y) and archaeal histone
1590479	NA	HMG (high mobility group) box	HMG (high mobility group) box
1789767	catalytic activity/metalloendopetidase activity/metal ion binding	Insulinase superfamily	Insulinase (Peptidase family M16), Peptidase M16 inactive domain
1669926	oxidation-reduction process/thyroxine 5' deiodinase activity	iodothyronine deiodinase	Iodothyronine deiodinase
1604945	NA	Jacalin-like_lectin_dom
1687481	chromosome segregation/centromere complex assembly	kinetochore protein CHL4 like	Kinetochore protein CHL4 like
1673346	NA	LCD1 superfamily	TLD
1594751	NA	lipopolysaccharide-induced tumor necrosis factor-alpha factor homolog	LITAF-like zinc ribbon domain
1688215	catalytic activity/carbohydrate metabolic process/carbohydrate binding	maltase glucoamylase and related hydrolases family 31	Galactose mutarotase-like, Trefoil (P-type) domain, Glycosyl hydrolases family 31
1496921	NA	map3k12-binding inhibitory protein 1
1727432	proteolysis/metabolic process/metallopeptidase activity	glutamate carboxypeptidase protein (Metalloexopeptidase)	Peptidase dimerisation domain, Peptidase family M20/M25/M40
1862919	ATP binding/mismatch repair	mismatch repair ATPase	MutS domain V, MutS family domain IV, MutS domain III
1678727	heat shock protein binding	molecular chaperones HSP70
1502385	heat shock protein binding	molecular chaperones HSP70	Hsp70 protein
1470446	heat shock protein binding	molecular chaperones HSP70
1788410	heat shock protein binding	Molecular chaperones HSP70/HSC70, HSP70 superfamily	Hsp70 protein
1678511	heat shock protein binding	Molecular chaperones HSP70/HSC70, HSP70 superfamily
849097	negative regulation of gene expression, epigenetic	m-phase phosphoprotein 8-like
1459571	nucleic acid binding	mRNA binding protein Encore	R3H domain
1492793	DNA binding/chromatin binding	MYB transcription factor	Myb-like DNA-binding domain
1665554	DNA-binding transcription factor activity	myb-like DNA-binding protein
1886493	NA	NA
1881401	NA	NA
1875686	NA	NA
1867663	NA	NA
1847257	NA	NA
1791161	NA	NA
1789637	NA	NA
1789233	NA	NA
1783298	NA	NA
1779355	NA	NA
1776287	NA	NA
1773503	NA	NA
1773501	NA	NA
1729335	NA	NA
1722956	NA	NA
1719040	NA	NA
1716664	NA	NA
1705836	NA	NA
1697164	NA	NA
1689894	NA	NA
1676791	NA	NA
1641300	NA	NA
1565337	NA	NA
1555216	NA	NA
1498946	NA	NA
1484012	NA	NA
1483187	NA	NA
1480178	NA	NA
1476995	NA	NA
1459039	NA	NA
588502	NA	NA
477537	NA	NA
1565040	oxireductase activity	NADH cytochrome b-5 reductase	Oxidoreductase NAD-binding domain, Oxidoreductase FAD-binding domain
1853333	ATP binding; hydrolase activity; mitochondrion organization	RNA helicase, P-loop containing nucleoside triphosphate hydrolase protein	AAA domain
1692778	NA	P-loop_NTPase	AAA domain
1835370	protein kinase activity/ATP binding/protein phosphorylation	Protein tyrosine kinase	Protein tyrosine kinase
1665783	intracellular transport	RAN binding protein1	RanBP1 domain
1678184	termination of G protein coupled receptor signaling pathway	RGS domain-containing protein	Regulator of G protein signaling domain
201300	protein kinase activity/ATP binding/protein phosphorylation	ribosomal protein S6 kinase	Protein tyrosine kinase
1743499	catalytic activity/iron sulfur cluster binding	Radical SAM superfamily, Elp3/MiaB/NifB	4Fe-4S single cluster domain, Radical SAM superfamily
1514052	cation transport/pore complex/hemolysis in other organism involved in symbiotic interaction	sea anemone cytolysin	Sea anemone cytotoxic protein
1154641	protein binding	SET domain	SET domain
1720051	NA	slime mold cyclic AMP receptor	Slime mold cyclic AMP receptor
1654068	GTP binding/proteolysis	sonic hedgehog and related proteins	AIG1 family, Hint module
1579524	GTP binding/proteolysis	sonic hedgehog and related proteins	AIG1 family, Hint module
1731956	NAD+ kinase activity/diacylglycerol kinase activity/metabolic process	Sphingosine kinase	Diacylglycerol kinase catalytic domain
1863903	serine type-endopeptidase activity	Subsitilin-related protease/vacuolar protease B	Subtilase family
1572471	NA	SufI Superfamily
1838179	DNA binding/protein binding	SWIRM domain	SWIRM domain
47119	calcium ion binding/protein binding	Synaptic vesicle protein EHS 1	Cytoskeletal-regulatory complex EF hand
1448689	NA	Thymidylate kinase/adenylate kinase	Thymidylate kinase
1449040	protein binding	TPR containing nuclear phosphoprotein that regulates K+ uptake	Tetratricopeptide repeat
1473582	DNA binding/regulation of transcription, DNA templated	transcription factor, contains HOX domain	Homeodomain
1486661	translation regulator	translation regulator	PPR repeat
1836111	protein kinase activity/ATP binding/protein phosphorylation	Tyrosine kinase specific for activated GTP-bound; Mg2+, Co2+ transporter	Protein kinase domain
1573401	protein kinase activity/ATP binding/protein phosphorylation	Tyrosine kinase specific for activated GTP-bound; Mg2+, Co2+ transporter	Protein tyrosine kinase
1519792	protein kinase activity/ATP binding/protein phosphorylation	Tyrosine kinase specific for activated GTP-bound	Protein tyrosine kinase
147734	protein kinase activity/ATP binding/protein phosphorylation	Tyrosine kinase specific for activated GTP-bound	Protein kinase domain
1875732	protein kinase activity/ATP binding/protein phosphorylation	Tyrosine kinases	Protein tyrosine kinase
1880686	protein binding/response to stress/zinc ion binding	ubiquitin family	Ubiquitin family, TerD domain
1670701	protein binding	ubiquitin like proteins	Ubiquitin-2 like Rad60 SUMO-like
1449807	NA	ubiquitin protein ligase	Ubiquitin-conjugating enzyme
1522696	aldo-keto reductase activity	voltage gated shaker like K+ channel/aldoketo reductase	Aldo/keto reductase family
1461054	NA	zinc knuckle transcription factor
1622156	chromatin organization/regulation of transcription, DNA-templated	MRG-domain-containing protein	MRG, RNA binding activity-knot of a chromodomain
1619938	metal ion binding	NA
